# Supplementary material for: Activation of lysosomal iron triggers ferroptosis in cancer
Source: Research Square preprint supplement (doi:10.21203/rs.3.rs-4165774/v1), 2024-04-08
Supplement: Supplementary file 1 [file 1291bbcd1e8a67531e47f5b1.xlsx]

## Sheet: Title
	Supplementary Table 3
	Quantitative mass spectrometry-based lipidomics of lisophospholipids in
	HT1080 cells treated with Fentomycin

## Sheet: LPC
precursorexpmz$A	sumcomposition	precursorppmdev$A	name	intensity:Exp_Sebastian_10_00.mzML	intensity:Exp_Sebastian_10_01.mzML	intensity:Exp_Sebastian_10_02.mzML	intensity:Exp_Sebastian_10_03.mzML	intensity:Exp_Sebastian_10_07.mzML	intensity:Exp_Sebastian_10_08.mzML	intensity:Exp_Sebastian_10_09.mzML	intensity:Exp_Sebastian_10_13.mzML	intensity:Exp_Sebastian_10_14.mzML	intensity:Exp_Sebastian_10_15.mzML	intensity:Exp_Sebastian_10_19.mzML	intensity:Exp_Sebastian_10_20.mzML	intensity:Exp_Sebastian_10_21.mzML	intensity:Exp_Sebastian_10_25.mzML	intensity:Exp_Sebastian_10_26.mzML	intensity:Exp_Sebastian_10_27.mzML
					Ctrl.	Fento 1 µM	Fento 2 µM	Ctrl.	Fento 1 µM	Fento 2 µM	Ctrl.	Fento 1 µM	Fento 2 µM	Ctrl.	Fento 1 µM	Fento 2 µM	Ctrl.	Fento 1 µM	Fento 2 µM
###
526.315	H49 C24 N1 O9 P1	-0.22ppm	LPC 14:0	0	0	0	5082.7	0	0	0	0	0	0	0	0	0	0	0	0
554.346	H53 C26 N1 O9 P1	-0.05ppm	LPC 16:0	0	185943	214918	416404	179622	257987	229346	141076	200722	270137	190217	218991	203473	164904	256962	332657
552.331	H51 C26 N1 O9 P1	0.24ppm	LPC 16:1	0	5389.8	0	20618.4	5704.2	9106.9	16134.4	0	11091.7	17036.8	17643.8	13044.8	16171	0	20958.8	13971.6
582.378	H57 C28 N1 O9 P1	0.39ppm	LPC 18:0	0	252758	250734	437177	214487	306170	266975	150066	256326	287669	159579	237618	200159	161878	283095	319398
580.362	H55 C28 N1 O9 P1	0.44ppm	LPC 18:1	0	106973	122496	217463	79937.5	158504	147742	71555.4	112714	152911	114508	143547	130269	107663	138397	191249
578.347	H53 C28 N1 O9 P1	0.88ppm	LPC 18:2	0	0	0	0	0	0	0	0	0	7031.9	0	0	8220.9	0	0	14701.1
608.394	H59 C30 N1 O9 P1	0.63ppm	LPC 20:1	0	0	0	0	0	0	0	0	0	0	0	0	0	0	0	0
628.363	H55 C32 N1 O9 P1	1.35ppm	LPC 22:5	0	0	0	0	0	0	0	0	0	0	0	6198.5	0	0	0	7687.3
precursorexpmz$A	sumcomposition	precursorppmdev$A	name	intensity:Exp6_Sebastian_10_00.mzML	intensity:Exp6_Sebastian_10_01.mzML	intensity:Exp6_Sebastian_10_02.mzML	intensity:Exp6_Sebastian_10_03.mzML	intensity:Exp6_Sebastian_10_07.mzML	intensity:Exp6_Sebastian_10_08.mzML	intensity:Exp6_Sebastian_10_09.mzML	intensity:Exp6_Sebastian_10_13.mzML	intensity:Exp6_Sebastian_10_14.mzML	intensity:Exp6_Sebastian_10_15.mzML	intensity:Exp6_Sebastian_10_19.mzML	intensity:Exp6_Sebastian_10_20.mzML	intensity:Exp6_Sebastian_10_21.mzML	intensity:Exp6_Sebastian_10_25.mzML	intensity:Exp6_Sebastian_10_26.mzML	intensity:Exp6_Sebastian_10_27.mzML
					Ctrl.	Fento 1 µM	Fento 2 µM	Ctrl.	Fento 1 µM	Fento 2 µM	Ctrl.	Fento 1 µM	Fento 2 µM	Ctrl.	Fento 1 µM	Fento 2 µM	Ctrl.	Fento 1 µM	Fento 2 µM
526.315	H49 C24 N1 O9 P1	-0.07ppm	LPC 14:0	0	0	4554.1	0	8371.2	0	4059.5	0	26788.1	32566	0	5916.4	28026.4	0	8748	32696.8
524.299	H47 C24 N1 O9 P1	-0.31ppm	LPC 14:1	0	0	0	0	0	0	0	0	5162.2	16327.4	0	0	6534.8	0	0	14014.2
554.346	H53 C26 N1 O9 P1	-0.12ppm	LPC 16:0	0	145941	158449	150598	236051	161898	116906	81246.7	279746	298423	93735.2	147019	370737	99572.6	221285	406572
552.331	H51 C26 N1 O9 P1	0.37ppm	LPC 16:1	0	6213.6	14683.5	3596.3	18226	8974.3	0	0	71848	73985.2	10586.3	21415.6	82579.5	13746.5	43671.8	95801.8
550.315	H49 C26 N1 O9 P1	0.67ppm	LPC 16:2	0	0	0	0	0	0	0	0	0	0	0	0	3642.4	0	0	5209.5
582.378	H57 C28 N1 O9 P1	0.36ppm	LPC 18:0	0	155870	146380	146372	227821	157826	109555	68243.6	158537	176339	83457.3	127255	200133	81832.4	145562	260169
580.362	H55 C28 N1 O9 P1	0.31ppm	LPC 18:1	0	71013.2	87081.5	84672.8	147346	83109.5	66633	47278.6	247859	239166	61250.2	111782	311534	60148.9	174566	328971
578.346	H53 C28 N1 O9 P1	0.28ppm	LPC 18:2	0	0	0	0	0	0	0	0	18109.1	10842.7	0	11940.5	25166	0	15452.9	32012.5
608.394	H59 C30 N1 O9 P1	0.88ppm	LPC 20:1	0	0	0	0	0	0	0	0	0	0	0	0	7706.9	0	0	13694
606.379	H57 C30 N1 O9 P1	2.77ppm	LPC 20:2	0	0	0	11570	8642.4	11123.8	4527	0	10013.1	0	0	0	10712.1	0	0	10881.8
604.362	H55 C30 N1 O9 P1	0.52ppm	LPC 20:3	0	0	0	0	0	0	0	0	0	3469.1	0	8268.2	24398	0	10783.6	38140.3
602.347	H53 C30 N1 O9 P1	0.79ppm	LPC 20:4	0	0	0	0	6155.9	0	0	0	16226.3	15661.7	0	17877.7	33886.7	3819.9	21717.6	48103

## Sheet: LPE
precursorexpmz$A	sumcomposition	precursorppmdev$A	name	intensity:Exp6_Sebastian_10_00.mzML	intensity:Exp6_Sebastian_10_01.mzML	intensity:Exp6_Sebastian_10_02.mzML	intensity:Exp6_Sebastian_10_03.mzML	intensity:Exp6_Sebastian_10_07.mzML	intensity:Exp6_Sebastian_10_08.mzML	intensity:Exp6_Sebastian_10_09.mzML	intensity:Exp6_Sebastian_10_13.mzML	intensity:Exp6_Sebastian_10_14.mzML	intensity:Exp6_Sebastian_10_15.mzML	intensity:Exp6_Sebastian_10_19.mzML	intensity:Exp6_Sebastian_10_20.mzML	intensity:Exp6_Sebastian_10_21.mzML	intensity:Exp6_Sebastian_10_25.mzML	intensity:Exp6_Sebastian_10_26.mzML	intensity:Exp6_Sebastian_10_27.mzML
					Ctrl.	Fento 1 µM	Fento 2 µM	Ctrl.	Fento 1 µM	Fento 2 µM	Ctrl.	Fento 1 µM	Fento 2 µM	Ctrl.	Fento 1 µM	Fento 2 µM	Ctrl.	Fento 1 µM	Fento 2 µM
###	LPEO
436.283	H43 C21 N1 O6 P1	0.13ppm	LPE O- 16:1	0	15885.7	29513.8	25486.2	13431.9	8428.9	30665.6	5645.2	38957.1	23200.3	8347.4	8441	34561.6	4222.9	23989.2	30978.2
434.268	H41 C21 N1 O6 P1	0.18ppm	LPE O- 16:2	0	3654.7	14966.2	0	0	0	8313.6	0	0	4088.2	0	0	0	0	5153.7	0
464.315	H47 C23 N1 O6 P1	-0.14ppm	LPE O- 18:1	18816.6	19152.5	164253	47271.3	10275.4	14483.8	23062.2	25623.8	23958.8	37580.6	45428.2	16227.6	32585.1	39376.9	37207.8	30963.7
462.299	H45 C23 N1 O6 P1	0.60ppm	LPE O- 18:2	0	5038	33142.5	18813.1	0	5603.6	6542.1	0	12563.1	7894.4	4787.5	0	17084.5	4337.4	11720.3	17849.1
492.346	H51 C25 N1 O6 P1	0.35ppm	LPE O- 20:1	15565.2	8253.9	109151	19834.4	3487.1	9548	10620.2	25574	6789.4	12522.8	29140.1	12766	13449.7	33715.5	21719.1	17249.2
490.33	H49 C25 N1 O6 P1	0.19ppm	LPE O- 20:2	0	0	31760.2	9390.7	0	0	0	0	3231.9	5835.4	0	0	0	4095.6	4338.7	0
###	LPE
452.278	H43 C21 N1 O7 P1	0.15ppm	LPE 16:0	0	3371.4	8591.6	10584.4	4073.1	0	3152	0	8877.1	12356.4	0	0	19269.3	0	9395.9	15190.4
480.31	H47 C23 N1 O7 P1	0.18ppm	LPE 18:0	7133.8	52769.4	130298	78524.7	28974.2	46773.7	40406.6	24768.4	60937.8	154690	53037.7	33023.3	77279.3	41532.7	61902.1	84891.3
478.294	H45 C23 N1 O7 P1	-0.03ppm	LPE 18:1	0	5967.8	24419.5	46536.1	13509.5	5232	7236.9	3393.9	56341.6	35950.1	9116.4	19800.4	63093.3	4978.3	44230.7	77731.5
508.341	H51 C25 N1 O7 P1	-0.13ppm	LPE 20:0	9978	32117.4	66002.5	33721.5	12401.4	15774.5	18011.2	0	13443.7	87135.4	27974.2	16917	11796.6	27072.2	19212.3	14207.5
506.325	H49 C25 N1 O7 P1	-0.14ppm	LPE 20:1	0	8489.2	28179	19535.8	9664.9	0	4309.9	4795.9	4846.4	40339	5741.3	0	18170.4	0	15957.3	22239.7
500.278	H43 C25 N1 O7 P1	0.27ppm	LPE 20:4	0	0	0	9395.7	11959.4	0	3423.4	0	35180.2	5573.8	0	25764.3	44807.9	0	24915.8	50178.4
534.357	H53 C27 N1 O7 P1	0.66ppm	LPE 22:1	0	0	9836.5	0	0	0	0	0	0	0	3881	0	0	4674.3	0	0
528.309	H47 C27 N1 O7 P1	-0.25ppm	LPE 22:4	0	0	0	0	0	0	0	0	7351.9	0	0	3289.7	7793.6	0	4087.2	9965.2
526.294	H45 C27 N1 O7 P1	-0.11ppm	LPE 22:5	0	0	0	0	0	0	0	0	0	0	0	3456.7	21399.9	0	9041.9	8689
precursorexpmz$A	sumcomposition	precursorppmdev$A	name	intensity:Exp6_Sebastian_10_00.mzML	intensity:Exp6_Sebastian_10_01.mzML	intensity:Exp6_Sebastian_10_02.mzML	intensity:Exp6_Sebastian_10_03.mzML	intensity:Exp6_Sebastian_10_07.mzML	intensity:Exp6_Sebastian_10_08.mzML	intensity:Exp6_Sebastian_10_09.mzML	intensity:Exp6_Sebastian_10_13.mzML	intensity:Exp6_Sebastian_10_14.mzML	intensity:Exp6_Sebastian_10_15.mzML	intensity:Exp6_Sebastian_10_19.mzML	intensity:Exp6_Sebastian_10_20.mzML	intensity:Exp6_Sebastian_10_21.mzML	intensity:Exp6_Sebastian_10_25.mzML	intensity:Exp6_Sebastian_10_26.mzML	intensity:Exp6_Sebastian_10_27.mzML
					Ctrl.	Fento 1 µM	Fento 2 µM	Ctrl.	Fento 1 µM	Fento 2 µM	Ctrl.	Fento 1 µM	Fento 2 µM	Ctrl.	Fento 1 µM	Fento 2 µM	Ctrl.	Fento 1 µM	Fento 2 µM
###	LPEO
436.283	H43 C21 N1 O6 P1	0.13ppm	LPE O- 16:1	0	15885.7	29513.8	25486.2	13431.9	8428.9	30665.6	5645.2	38957.1	23200.3	8347.4	8441	34561.6	4222.9	23989.2	30978.2
434.268	H41 C21 N1 O6 P1	0.18ppm	LPE O- 16:2	0	3654.7	14966.2	0	0	0	8313.6	0	0	4088.2	0	0	0	0	5153.7	0
464.315	H47 C23 N1 O6 P1	-0.14ppm	LPE O- 18:1	18816.6	19152.5	164253	47271.3	10275.4	14483.8	23062.2	25623.8	23958.8	37580.6	45428.2	16227.6	32585.1	39376.9	37207.8	30963.7
462.299	H45 C23 N1 O6 P1	0.60ppm	LPE O- 18:2	0	5038	33142.5	18813.1	0	5603.6	6542.1	0	12563.1	7894.4	4787.5	0	17084.5	4337.4	11720.3	17849.1
492.346	H51 C25 N1 O6 P1	0.35ppm	LPE O- 20:1	15565.2	8253.9	109151	19834.4	3487.1	9548	10620.2	25574	6789.4	12522.8	29140.1	12766	13449.7	33715.5	21719.1	17249.2
490.33	H49 C25 N1 O6 P1	0.19ppm	LPE O- 20:2	0	0	31760.2	9390.7	0	0	0	0	3231.9	5835.4	0	0	0	4095.6	4338.7	0
###	LPE
452.278	H43 C21 N1 O7 P1	0.15ppm	LPE 16:0	0	3371.4	8591.6	10584.4	4073.1	0	3152	0	8877.1	12356.4	0	0	19269.3	0	9395.9	15190.4
480.31	H47 C23 N1 O7 P1	0.18ppm	LPE 18:0	7133.8	52769.4	130298	78524.7	28974.2	46773.7	40406.6	24768.4	60937.8	154690	53037.7	33023.3	77279.3	41532.7	61902.1	84891.3
478.294	H45 C23 N1 O7 P1	-0.03ppm	LPE 18:1	0	5967.8	24419.5	46536.1	13509.5	5232	7236.9	3393.9	56341.6	35950.1	9116.4	19800.4	63093.3	4978.3	44230.7	77731.5
508.341	H51 C25 N1 O7 P1	-0.13ppm	LPE 20:0	9978	32117.4	66002.5	33721.5	12401.4	15774.5	18011.2	0	13443.7	87135.4	27974.2	16917	11796.6	27072.2	19212.3	14207.5
506.325	H49 C25 N1 O7 P1	-0.14ppm	LPE 20:1	0	8489.2	28179	19535.8	9664.9	0	4309.9	4795.9	4846.4	40339	5741.3	0	18170.4	0	15957.3	22239.7
500.278	H43 C25 N1 O7 P1	0.27ppm	LPE 20:4	0	0	0	9395.7	11959.4	0	3423.4	0	35180.2	5573.8	0	25764.3	44807.9	0	24915.8	50178.4
534.357	H53 C27 N1 O7 P1	0.66ppm	LPE 22:1	0	0	9836.5	0	0	0	0	0	0	0	3881	0	0	4674.3	0	0
528.309	H47 C27 N1 O7 P1	-0.25ppm	LPE 22:4	0	0	0	0	0	0	0	0	7351.9	0	0	3289.7	7793.6	0	4087.2	9965.2
526.294	H45 C27 N1 O7 P1	-0.11ppm	LPE 22:5	0	0	0	0	0	0	0	0	0	0	0	3456.7	21399.9	0	9041.9	8689

## Sheet: LPS
precursorexpmz$A	sumcomposition	precursorppmdev$A	name	intensity:Exp_Sebastian_2_00.mzML	intensity:Exp_Sebastian_2_01.mzML	intensity:Exp_Sebastian_2_02.mzML	intensity:Exp_Sebastian_2_03.mzML	intensity:Exp_Sebastian_2_07.mzML	intensity:Exp_Sebastian_2_08.mzML	intensity:Exp_Sebastian_2_09.mzML	intensity:Exp_Sebastian_2_13.mzML	intensity:Exp_Sebastian_2_14.mzML	intensity:Exp_Sebastian_2_15.mzML	intensity:Exp_Sebastian_2_19.mzML	intensity:Exp_Sebastian_2_20.mzML	intensity:Exp_Sebastian_2_21.mzML	intensity:Exp_Sebastian_2_25.mzML	intensity:Exp_Sebastian_2_26.mzML	intensity:Exp_Sebastian_2_27.mzML
###	LPS				Ctrl.	Fento 1 µM	Fento 2 µM	Ctrl.	Fento 1 µM	Fento 2 µM	Ctrl.	Fento 1 µM	Fento 2 µM	Ctrl.	Fento 1 µM	Fento 2 µM	Ctrl.	Fento 1 µM	Fento 2 µM
496.268	H43 C22 N1 O9 P1	-0.53ppm	LPS 16:0	0	0	12619	26504.2	0	0	14300.9	0	13471.7	17269.6	0	6396.2	14306.4	0	6179.5	9280.2
524.299	H47 C24 N1 O9 P1	-1.13ppm	LPS 18:0	0	146341	244795	288454	231815	141361	390497	117421	262516	381643	255190	293780	355093	227925	212549	349965
522.283	H45 C24 N1 O9 P1	-1.22ppm	LPS 18:1	0	31332.2	80333.7	79275.4	53486	34315.4	122363	10122.5	75112.9	125984	82195.9	71121.7	119211	43719.6	63816	104294
572.299	H47 C28 N1 O9 P1	-0.69ppm	LPS 22:4	0	0	0	0	0	0	0	0	0	0	0	0	0	0	0	0
570.283	H45 C28 N1 O9 P1	-1.79ppm	LPS 22:5	0	0	0	0	5432.7	0	0	0	0	0	0	0	7770.6	0	0	6607.2
568.268	H43 C28 N1 O9 P1	-0.27ppm	LPS 22:6	0	0	0	0	0	0	0	0	0	0	0	0	9968.5	0	0	0
precursorexpmz$A	sumcomposition	precursorppmdev$A	name	intensity:Exp6_Sebastian_2_00.mzML	intensity:Exp6_Sebastian_2_01.mzML	intensity:Exp6_Sebastian_2_02.mzML	intensity:Exp6_Sebastian_2_03.mzML	intensity:Exp6_Sebastian_2_07.mzML	intensity:Exp6_Sebastian_2_08.mzML	intensity:Exp6_Sebastian_2_09.mzML	intensity:Exp6_Sebastian_2_13.mzML	intensity:Exp6_Sebastian_2_14.mzML	intensity:Exp6_Sebastian_2_15.mzML	intensity:Exp6_Sebastian_2_19.mzML	intensity:Exp6_Sebastian_2_20.mzML	intensity:Exp6_Sebastian_2_21.mzML	intensity:Exp6_Sebastian_2_25.mzML	intensity:Exp6_Sebastian_2_26.mzML	intensity:Exp6_Sebastian_2_27.mzML
###	LPS				Ctrl.	Fento 1 µM	Fento 2 µM	Ctrl.	Fento 1 µM	Fento 2 µM	Ctrl.	Fento 1 µM	Fento 2 µM	Ctrl.	Fento 1 µM	Fento 2 µM	Ctrl.	Fento 1 µM	Fento 2 µM
496.268	H43 C22 N1 O9 P1	0.53ppm	LPS 16:0	0	11379.1	9717.7	4913.6	0	10727.2	5841.1	0	16376.7	22220.1	0	7018	29687	0	13720.3	25120.3
522.284	H45 C24 N1 O9 P1	-0.30ppm	LPS 18:1	0	46886.1	38996.6	44925.4	53542.8	39912.3	52820.6	20922.3	108017	102444	23044	49941.7	120639	15382.6	65671.4	125720
552.331	H51 C26 N1 O9 P1	0.26ppm	LPS 20:0	0	3444.7	4016.1	0	3285.9	0	3533.4	5829	73247.3	52112.2	0	17372.1	51991.7	3950.6	19064.1	37118.4
550.315	H49 C26 N1 O9 P1	-0.10ppm	LPS 20:1	0	0	0	0	0	0	0	0	14111.6	26925.9	0	0	14889.6	0	7597.1	33171.8
578.346	H53 C28 N1 O9 P1	0.29ppm	LPS 22:1	0	0	0	0	0	0	0	0	45184.8	50254.3	0	7959.9	33987.3	0	25429.9	32842.3
576.331	H51 C28 N1 O9 P1	-0.08ppm	LPS 22:2	0	0	0	0	0	0	0	0	7010.4	8501.5	0	0	10916.9	0	5568.1	14638.9
572.299	H47 C28 N1 O9 P1	-0.13ppm	LPS 22:4	0	0	0	0	0	0	3616.9	0	0	0	0	0	0	0	6435.5	3197.6

## Sheet: LPI
precursorexpmz$A	sumcomposition	precursorppmdev$A	name	intensity:Exp_Sebastian_2_00.mzML	intensity:Exp_Sebastian_2_01.mzML	intensity:Exp_Sebastian_2_02.mzML	intensity:Exp_Sebastian_2_03.mzML	intensity:Exp_Sebastian_2_07.mzML	intensity:Exp_Sebastian_2_08.mzML	intensity:Exp_Sebastian_2_09.mzML	intensity:Exp_Sebastian_2_13.mzML	intensity:Exp_Sebastian_2_14.mzML	intensity:Exp_Sebastian_2_15.mzML	intensity:Exp_Sebastian_2_19.mzML	intensity:Exp_Sebastian_2_20.mzML	intensity:Exp_Sebastian_2_21.mzML	intensity:Exp_Sebastian_2_25.mzML	intensity:Exp_Sebastian_2_26.mzML	intensity:Exp_Sebastian_2_27.mzML
###	LPI				Ctrl.	Fento 1 µM	Fento 2 µM	Ctrl.	Fento 1 µM	Fento 2 µM	Ctrl.	Fento 1 µM	Fento 2 µM	Ctrl.	Fento 1 µM	Fento 2 µM	Ctrl.	Fento 1 µM	Fento 2 µM
571.288	H48 C25 O12 P1	-0.94ppm	LPI 16:0	4030.6	24622.8	56787.4	102343	31945.5	36519.7	101814	17507.1	32542.4	114706	40394.8	51900.8	95731.1	35736	51955	101066
569.273	H46 C25 O12 P1	-0.78ppm	LPI 16:1	0	0	0	8254.3	0	0	0	0	0	0	0	0	0	0	0	0
599.32	H52 C27 O12 P1	-0.49ppm	LPI 18:0	52882.8	458699	872098	1099056	628709	474539	1.34616e+06	354840	816156	1.45879e+06	890630	873288	1.27565e+06	779132	694378	1.17271e+06
597.304	H50 C27 O12 P1	-0.55ppm	LPI 18:1	0	62218.5	130511	235438	92213	70813.5	240100	47319.2	146388	315827	115398	164768	286813	106804	150036	241424
595.289	H48 C27 O12 P1	0.19ppm	LPI 18:2	0	0	0	0	0	0	0	0	0	10779.4	0	0	0	0	0	6863.6
621.304	H50 C29 O12 P1	-0.37ppm	LPI 20:3	0	0	0	7468.6	0	0	0	0	6646.5	26631.6	0	8641.7	24364.9	0	0	10831.4
619.288	H48 C29 O12 P1	-0.78ppm	LPI 20:4	0	70117.6	90903.8	117661	90765.5	35374.5	115181	11093	76842.4	117510	118253	49389.1	115544	50975.5	58355.4	92633.2
647.321	H52 C31 O12 P1	1.21ppm	LPI 22:4	0	0	0	0	0	0	0	0	0	0	0	0	0	0	0	0
645.304	H50 C31 O12 P1	-0.34ppm	LPI 22:5	0	6212	0	0	0	0	0	0	0	0	0	0	0	0	0	0
643.289	H48 C31 O12 P1	0.09ppm	LPI 22:6	0	0	0	0	0	0	0	0	0	0	0	0	0	0	0	0
precursorexpmz$A	sumcomposition	precursorppmdev$A	name	intensity:Exp6_Sebastian_2_00.mzML	intensity:Exp6_Sebastian_2_01.mzML	intensity:Exp6_Sebastian_2_02.mzML	intensity:Exp6_Sebastian_2_03.mzML	intensity:Exp6_Sebastian_2_07.mzML	intensity:Exp6_Sebastian_2_08.mzML	intensity:Exp6_Sebastian_2_09.mzML	intensity:Exp6_Sebastian_2_13.mzML	intensity:Exp6_Sebastian_2_14.mzML	intensity:Exp6_Sebastian_2_15.mzML	intensity:Exp6_Sebastian_2_19.mzML	intensity:Exp6_Sebastian_2_20.mzML	intensity:Exp6_Sebastian_2_21.mzML	intensity:Exp6_Sebastian_2_25.mzML	intensity:Exp6_Sebastian_2_26.mzML	intensity:Exp6_Sebastian_2_27.mzML
###	LPI				Ctrl.	Fento 1 µM	Fento 2 µM	Ctrl.	Fento 1 µM	Fento 2 µM	Ctrl.	Fento 1 µM	Fento 2 µM	Ctrl.	Fento 1 µM	Fento 2 µM	Ctrl.	Fento 1 µM	Fento 2 µM
571.289	H48 C25 O12 P1	0.07ppm	LPI 16:0	3378.8	39875.3	29795.7	28040.4	13003.1	8514.3	30201.3	23319.1	57395	79474.8	19867.4	41435.2	96100.3	10419.6	55920	98980.2
569.274	H46 C25 O12 P1	0.39ppm	LPI 16:1	0	0	3252.7	0	0	0	0	0	0	0	0	0	4721.3	0	0	14438.4
599.32	H52 C27 O12 P1	0.41ppm	LPI 18:0	13789.5	387565	351952	375077	206552	406886	399855	415615	807571	1.01304e+06	317052	535579	1.11624e+06	236884	753014	1.28822e+06
597.305	H50 C27 O12 P1	0.41ppm	LPI 18:1	0	68894.5	60910.9	65253.5	41818.3	66837.4	77152.2	83877.1	255797	315296	49417.3	113029	353352	37086.8	197989	354245
595.289	H48 C27 O12 P1	0.41ppm	LPI 18:2	0	4064	0	0	0	0	0	0	9269.2	4585.7	0	0	9876.5	0	0	6347.9
625.336	H54 C29 O12 P1	0.17ppm	LPI 20:1	0	0	0	0	0	0	0	0	5949.9	8518.1	0	7476.7	10377.4	0	6981.3	5242.8
621.305	H50 C29 O12 P1	0.18ppm	LPI 20:3	0	0	0	0	0	5361.8	0	0	4849.8	0	0	0	4381.9	0	3902.8	5054.9
619.289	H48 C29 O12 P1	0.13ppm	LPI 20:4	0	31908.9	35176.8	35392.1	15553.5	38141	42865.8	41321.9	23351.5	38832.4	46472.2	27074.1	38761.3	26168.8	24491.6	44637.9
