# Supplementary material for: Activation of lysosomal iron triggers ferroptosis in cancer
Source: Research Square preprint supplement (doi:10.21203/rs.3.rs-4165774/v1), 2024-04-08
Supplement: Supplementary file 2 [file 348717cfc53dcc82262a67ce.xlsx]

## Sheet: Title
	Supplementary Table 2
	Quantitative mass spectrometry-based lipidomics of oxidised phospholipids in
	HT1080 cells treated with fentomycin and ferroptosis inhibitors

## Sheet: PC and PCOx
precursorexpmz$A	sumcomposition	precursorppmdev$A	name	intensity:Exp_Sebastian_10_00.mzML	intensity:Exp_Sebastian_10_01.mzML	intensity:Exp_Sebastian_10_02.mzML	intensity:Exp_Sebastian_10_03.mzML	intensity:Exp_Sebastian_10_04.mzML	intensity:Exp_Sebastian_10_05.mzML	intensity:Exp_Sebastian_10_06.mzML	intensity:Exp_Sebastian_10_07.mzML	intensity:Exp_Sebastian_10_08.mzML	intensity:Exp_Sebastian_10_09.mzML	intensity:Exp_Sebastian_10_10.mzML	intensity:Exp_Sebastian_10_11.mzML	intensity:Exp_Sebastian_10_12.mzML	intensity:Exp_Sebastian_10_13.mzML	intensity:Exp_Sebastian_10_14.mzML	intensity:Exp_Sebastian_10_15.mzML	intensity:Exp_Sebastian_10_16.mzML	intensity:Exp_Sebastian_10_17.mzML	intensity:Exp_Sebastian_10_18.mzML	intensity:Exp_Sebastian_10_19.mzML	intensity:Exp_Sebastian_10_20.mzML	intensity:Exp_Sebastian_10_21.mzML	intensity:Exp_Sebastian_10_22.mzML	intensity:Exp_Sebastian_10_23.mzML	intensity:Exp_Sebastian_10_24.mzML	intensity:Exp_Sebastian_10_25.mzML	intensity:Exp_Sebastian_10_26.mzML	intensity:Exp_Sebastian_10_27.mzML	intensity:Exp_Sebastian_10_28.mzML	intensity:Exp_Sebastian_10_29.mzML	intensity:Exp_Sebastian_10_30.mzML	name	intensity:Exp_Sebastian_10_01.mzML	intensity:Exp_Sebastian_10_02.mzML	intensity:Exp_Sebastian_10_03.mzML	intensity:Exp_Sebastian_10_04.mzML	intensity:Exp_Sebastian_10_05.mzML	intensity:Exp_Sebastian_10_06.mzML	intensity:Exp_Sebastian_10_07.mzML	intensity:Exp_Sebastian_10_08.mzML	intensity:Exp_Sebastian_10_09.mzML	intensity:Exp_Sebastian_10_10.mzML	intensity:Exp_Sebastian_10_11.mzML	intensity:Exp_Sebastian_10_12.mzML	intensity:Exp_Sebastian_10_13.mzML	intensity:Exp_Sebastian_10_14.mzML
					Ctrl.	Fento 1 µM	Fento 2 µM	Fento 1 µM + Toc	Fento 1 µM + Def	Fento 1 µM + Lip-1	Ctrl.	Fento 1 µM	Fento 2 µM	Fento 1 µM + Toc	Fento 1 µM + Def	Fento 1 µM + Lip-1	Ctrl.	Fento 1 µM	Fento 2 µM	Fento 1 µM + Toc	Fento 1 µM + Def	Fento 1 µM + Lip-1	Ctrl.	Fento 1 µM	Fento 2 µM	Fento 1 µM + Toc	Fento 1 µM + Def	Fento 1 µM + Lip-1	Ctrl.	Fento 1 µM	Fento 2 µM	Fento 1 µM + Toc	Fento 1 µM + Def	Fento 1 µM + Lip-1
###	Phosphatidylcholine			0	1	2	3	4	5	6	7	8	9	10	11	12	13	14	15	16	17	18	19	20	21	22	23	24	25	26	27	28	29	30		Normalisation
762.6	H85 C42 N1 O8 P1	-1.11ppm	PC 34:0	3.06525e+08	2.22598e+08	1.8879e+08	2.52008e+08	1.89839e+08	1.92275e+08	1.91382e+08	2.3922e+08	2.6421e+08	2.2676e+08	2.08352e+08	1.93014e+08	2.18645e+08	3.29746e+08	2.52735e+08	2.5932e+08	1.36811e+08	3.01959e+08	2.0394e+08	2.10412e+08	243466618	2.36823e+08	1.71957e+08	2.74235e+08	2.33287e+08	2.12417e+08	2.50349e+08	2.32807e+08	193884649	2.03566e+08	2.68211e+08		1	2	3	4	5	6	7	8	9	10	11	12	13	14
678.507	H73 C36 N1 O8 P1	0.02ppm	PC 28:0	0	5.2273e+06	4.69543e+06	4.57432e+06	5.444e+06	6378137	3.35379e+06	4.90358e+06	4.01365e+06	5.59805e+06	5.68492e+06	5.21375e+06	3.0955e+06	3.46865e+06	4.02441e+06	4.77909e+06	4.37294e+06	3.45485e+06	2.26837e+06	5.25377e+06	4.48171e+06	3.79596e+06	3.903e+06	3.22583e+06	2.42611e+06	4.13878e+06	3.99495e+06	3.8321e+06	3.46611e+06	2.67186e+06	2.61219e+06	PC 28:0	7.04495	7.46135	5.44545	8.60308	9.95158	5.25723	6.14947	4.55734	7.40613	8.18556	8.10366	4.2473	3.15575	4.77702
706.538	H77 C38 N1 O8 P1	-0.19ppm	PC 30:0	0	8.14501e+07	6.78361e+07	6.49202e+07	70973389	7.99289e+07	4.63631e+07	7.66584e+07	5.94072e+07	7.57167e+07	7.37411e+07	68121414	4.71809e+07	6.09459e+07	6.28403e+07	69611771	57788347	5.11593e+07	3.52306e+07	8.56846e+07	7.14271e+07	5.65544e+07	5.00122e+07	4.81306e+07	3.95377e+07	6.97505e+07	61257658	55239239	4.41529e+07	3.68275e+07	4.025e+07	PC 30:0	109.772	107.796	77.2836	112.158	124.71	72.6764	96.1355	67.4545	100.172	106.178	105.88	64.7364	55.4481	74.5922
734.569	H81 C40 N1 O8 P1	-0.45ppm	PC 32:0	0	1.46005e+08	1.13493e+08	1.03963e+08	1.0968e+08	1.28045e+08	6.66842e+07	1.40031e+08	9.95395e+07	1.2439e+08	1.17003e+08	1.1107e+08	6.908e+07	1.18007e+08	1.0887e+08	1.13523e+08	8.78944e+07	75970858	5.32819e+07	1.59486e+08	1.22143e+08	9.2089e+07	7.99722e+07	7.23568e+07	6.02054e+07	1.32537e+08	1.05051e+08	8.84976e+07	6.97516e+07	5.46148e+07	5.90333e+07	PC 32:0	196.775	180.347	123.762	173.325	199.784	104.531	175.61	113.023	164.566	168.469	172.634	94.7838	107.362	129.23
700.49	H71 C38 N1 O8 P1	-1.12ppm	PC 30:3	0	32388.3	70616.9	15961.4	149409	150949	69170.8	48404.7	49485.2	102556	147557	121894	38940.8	35550.4	52387	149198	128158	77739.3	65276.8	70625	105046	106681	55044.3	26327.2	100493	79220.9	90446.1	72240.4	49780.1	56204.3	88665	PC 30:3	0.0436505	0.112215	0.0190011	0.236109	0.23552	0.108429	0.0607032	0.0561885	0.13568	0.212463	0.189459	0.0534302	0.0323435	0.062184
728.522	H75 C40 N1 O8 P1	-0.30ppm	PC 32:3	0	1.95609e+06	2.15582e+06	1.81582e+06	2.30517e+06	2368101	1.57045e+06	1.98587e+06	1.81109e+06	2.05745e+06	2.39334e+06	2.41113e+06	1.71497e+06	2.01885e+06	2.34301e+06	3.07322e+06	2.01031e+06	1.85615e+06	1.6192e+06	2.71982e+06	2.27097e+06	2.18188e+06	1.74181e+06	1.78055e+06	1.76639e+06	2233796	1.96335e+06	2.42017e+06	1.71713e+06	2.21995e+06	1900899	PC 32:3	2.63627	3.42575	2.16162	3.64283	3.69486	2.46176	2.49043	2.05642	2.72197	3.44611	3.74759	2.35309	1.83673	2.78118
756.554	H79 C42 N1 O8 P1	0.17ppm	PC 34:3	0	1.35617e+07	1.26882e+07	1.1918e+07	1.22244e+07	1.43579e+07	9.95548e+06	1.25796e+07	1.06897e+07	1.40608e+07	1.34338e+07	1.27112e+07	1.09617e+07	1.11774e+07	1.29758e+07	1.4804e+07	1.04746e+07	1.03163e+07	9.56375e+06	1.57721e+07	1.385e+07	1.13868e+07	9.39448e+06	9.9418e+06	1.04764e+07	1.27367e+07	11456560	11883705	8.62548e+06	8.58366e+06	1.07816e+07	PC 34:3	18.2774	20.1623	14.1876	19.3181	22.4021	15.6057	15.7757	12.1377	18.6022	19.3429	19.7568	15.0404	10.1691	15.4024
754.538	H77 C42 N1 O8 P1	-0.42ppm	PC 34:4	0	4.81313e+06	5.61967e+06	4.35262e+06	4.84345e+06	5.18027e+06	3.90054e+06	4.67847e+06	4.60915e+06	5.08713e+06	5.37116e+06	5.79744e+06	4.49074e+06	4.55244e+06	5.37181e+06	6.6286e+06	3.98481e+06	3.68255e+06	3.59851e+06	5.48717e+06	4.60821e+06	4.24846e+06	3.26092e+06	3.48359e+06	3.81356e+06	4.7348e+06	4.03878e+06	5.0777e+06	3.21926e+06	5.21246e+06	4.01026e+06	PC 34:4	6.48676	8.93003	5.18153	7.65405	8.08259	6.11428	5.86717	5.2335	6.73019	7.73378	9.01089	6.16169	4.14177	6.3764
752.523	H75 C42 N1 O8 P1	0.60ppm	PC 34:5	0	281172	314694	277470	217991	332980	102443	262370	233620	423231	142590	169976	55709.9	329711	264436	432917	110668	267831	94068	524121	457407	306912	196338	191840	197301	266109	343169	217000	177155	213024	160860	PC 34:5	0.378941	0.500069	0.330311	0.344488	0.519537	0.160585	0.329032	0.265266	0.559928	0.205311	0.264192	0.0764389	0.299968	0.313889
748.491	H71 C42 N1 O8 P1	-0.25ppm	PC 34:7	0	124995	128848	113534	91441.6	173632	132160	86287	57106.8	185282	199182	143533	186816	104141	113321	0	75778.9	0	0	48606.8	367284	0	252808	438874	0	420954	29441.6	57321.7	325116	75381.5	548680	PC 34:7	0.168459	0.204748	0.135156	0.144504	0.270912	0.207168	0.108211	0.0648425	0.245124	0.286796	0.223092	0.256328	0.094747	0.134513
782.569	H81 C44 N1 O8 P1	-0.95ppm	PC 36:4	0	6.80088e+07	5.85234e+07	5.04171e+07	4.31227e+07	4.70908e+07	4.04716e+07	6.58781e+07	5.20131e+07	5.96423e+07	4.62698e+07	4.52042e+07	45862983	5.05984e+07	5.14266e+07	56692070	30877036	3.42317e+07	3.29249e+07	6.80459e+07	5.02403e+07	4.07604e+07	2.72329e+07	3.2359e+07	3.58509e+07	55322197	4.34023e+07	4.3603e+07	2.47775e+07	3.28382e+07	3.67459e+07	PC 36:4	91.657	92.9976	60.0186	68.1462	73.4741	63.4411	82.6162	59.0588	78.9058	66.6226	70.2604	62.928	46.034	61.044
780.553	H79 C44 N1 O8 P1	-0.63ppm	PC 36:5	0	1.1144e+07	1.01832e+07	8.87697e+06	8638681	9.45784e+06	6.97687e+06	1.09131e+07	9.03658e+06	1.06479e+07	9.16555e+06	8.78051e+06	8.06565e+06	9.55556e+06	1.01943e+07	11215367	6.90586e+06	7.09996e+06	6.73835e+06	1.3353e+07	1.05234e+07	8.35842e+06	6.40265e+06	6.88036e+06	7.21985e+06	1.0951e+07	9.10731e+06	8.79306e+06	5.61823e+06	6.73807e+06	7.306e+06	PC 36:5	15.0191	16.1818	10.5675	13.6516	14.7567	10.9366	13.6858	10.2607	14.087	13.1972	13.6474	11.0668	8.69358	12.1008
778.538	H77 C44 N1 O8 P1	-0.64ppm	PC 36:6	89742.1	2.44323e+06	2.21558e+06	2.06742e+06	2.19311e+06	2.50164e+06	1.46531e+06	2.20906e+06	1.90264e+06	2.29598e+06	2.33506e+06	2194298	1.62925e+06	2.1656e+06	2.26963e+06	2.4672e+06	1.98874e+06	1.76304e+06	1.60464e+06	3.0799e+06	2.32553e+06	1.92206e+06	1.7958e+06	1.64109e+06	1.59086e+06	2.44923e+06	2.04677e+06	2.02765e+06	1.4628e+06	1.36426e+06	1.78791e+06	PC 36:6	3.2928	3.5207	2.46114	3.46574	3.90322	2.29695	2.77033	2.16037	3.03754	3.36219	3.41057	2.23547	1.97024	2.69408
784.584	H83 C44 N1 O8 P1	-0.97ppm	PC 36:3	9.4589e+06	61508422	5.57636e+07	5.50848e+07	4.74411e+07	5.31308e+07	4.25198e+07	6.04337e+07	5.1262e+07	6.34229e+07	51666354	4.86935e+07	4.69653e+07	5.30397e+07	5.88648e+07	6.64408e+07	3.90962e+07	4.69832e+07	3.7937e+07	6.93599e+07	6.24466e+07	5.16098e+07	3.67708e+07	4.47336e+07	4.20196e+07	56403708	5.45544e+07	53087009	32428411	3.99174e+07	43117655	PC 36:3	82.8964	88.612	65.5751	74.9705	82.8982	66.6518	75.7886	58.206	83.9075	74.393	75.6837	64.4405	48.2551	69.8733
812.616	H87 C46 N1 O8 P1	-0.88ppm	PC 38:3	0	2.24139e+07	1.82142e+07	1.78349e+07	1.38095e+07	1.59123e+07	1.37726e+07	2.06764e+07	1.60801e+07	1.9954e+07	1.43011e+07	1.35409e+07	1.33262e+07	1.76834e+07	1.78793e+07	1.88681e+07	1.09942e+07	1.6285e+07	1.113e+07	2.43219e+07	2.02314e+07	1.51444e+07	1.03279e+07	1.55076e+07	1.21347e+07	1.96445e+07	1.7509e+07	1.54078e+07	8.68427e+06	1.15734e+07	1.19354e+07	PC 38:3	30.2078	28.9436	21.2313	21.823	24.8274	21.5891	25.9298	18.2583	26.3988	20.5918	21.0465	18.2847	16.0883	21.2229
810.6	H85 C46 N1 O8 P1	-1.01ppm	PC 38:4	0	8.69766e+07	6.91678e+07	6.27264e+07	4.75583e+07	5.29719e+07	4.64814e+07	8.3467e+07	6.13577e+07	7.35949e+07	5.00811e+07	4.70646e+07	5.05003e+07	6.83345e+07	6.30362e+07	63255735	3.55572e+07	5.27907e+07	3.90084e+07	9.07054e+07	6.86015e+07	5.07428e+07	3.33917e+07	5.01271e+07	4.23004e+07	73991069	5.91225e+07	4.96257e+07	2.87017e+07	3.92339e+07	42267152	PC 38:4	117.22	109.912	74.672	75.1558	82.6501	72.8618	104.674	69.6693	97.3649	72.1105	73.1519	69.2908	62.1702	74.8247
808.584	H83 C46 N1 O8 P1	-1.00ppm	PC 38:5	0	75940803	6.42736e+07	5.75599e+07	4.7373e+07	5.51316e+07	4.30139e+07	7.34584e+07	5.73345e+07	66561780	5.1669e+07	4.94764e+07	4.74162e+07	6.10392e+07	6.15242e+07	6.3328e+07	3.71751e+07	4.8394e+07	3.69922e+07	8.3942e+07	6.52888e+07	4.86179e+07	3.48921e+07	4.52692e+07	4.00859e+07	6.77602e+07	5.60278e+07	4.81394e+07	2.99705e+07	3.74582e+07	41675383	PC 38:5	102.347	102.135	68.5217	74.8629	86.0199	67.4264	92.1225	65.101	88.0602	74.3968	76.9006	65.0592	55.533	73.03
806.569	H81 C46 N1 O8 P1	-0.46ppm	PC 38:6	0	2.98303e+07	2.40455e+07	1.99047e+07	2.17573e+07	2.2965e+07	1.61349e+07	2.79855e+07	2.11253e+07	2.52681e+07	2.1314e+07	18580259	1.78418e+07	2.51419e+07	2.484e+07	2.61493e+07	1.7124e+07	1.8369e+07	1.52792e+07	35507440	2.71929e+07	2.30902e+07	1.46695e+07	16193181	1.74317e+07	2.84167e+07	2.24496e+07	2.03962e+07	1.45893e+07	16803134	1.63175e+07	PC 38:6	40.2031	38.2099	23.6953	34.3828	35.8314	25.2923	35.0959	23.9869	33.4293	30.6894	28.8791	24.4805	22.8739	29.4854
804.553	H79 C46 N1 O8 P1	-1.38ppm	PC 38:7	45312	2.73918e+06	2.62438e+06	2.11895e+06	2.63568e+06	2.85738e+06	1.91304e+06	2.93044e+06	2.30924e+06	2.62205e+06	2.88529e+06	2.61589e+06	2.12326e+06	2.66129e+06	2.72388e+06	3.12785e+06	2.05337e+06	2.13882e+06	1.71567e+06	3.68768e+06	2.63624e+06	2.19434e+06	1.77218e+06	1.92111e+06	1.96708e+06	2.66804e+06	2.42215e+06	2.27226e+06	1.77639e+06	1.87321e+06	1.95565e+06	PC 38:7	3.69166	4.17032	2.52248	4.16514	4.45826	2.99879	3.675	2.62205	3.46893	4.15446	4.06584	2.9133	2.42122	3.23328
838.631	H89 C48 N1 O8 P1	-0.71ppm	PC 40:4	0	14553078	1.18139e+07	1.08634e+07	9.12928e+06	1.01545e+07	7.07275e+06	1.39723e+07	1.00887e+07	1.26798e+07	9.26694e+06	8.96263e+06	7.5537e+06	1.1331e+07	1.11307e+07	1.14369e+07	6.90344e+06	1.10027e+07	6021768	1.59801e+07	1.26184e+07	9.11137e+06	6.61385e+06	1.02363e+07	6.38538e+06	1.30861e+07	1.07447e+07	9.10188e+06	5.64709e+06	7.44313e+06	6.27909e+06	PC 40:4	19.6135	18.7731	12.9323	14.4269	15.8437	11.0869	17.5224	11.4554	16.7752	13.3432	13.9305	10.3643	10.3088	13.2122
836.616	H87 C48 N1 O8 P1	-0.78ppm	PC 40:5	0	3.27912e+07	2.67723e+07	2.40577e+07	1.98244e+07	2.29985e+07	1.75216e+07	3.12923e+07	2.31578e+07	2.81066e+07	2.10395e+07	2.03562e+07	1.8674e+07	2.71234e+07	2.53086e+07	2.55426e+07	1.54851e+07	2.54856e+07	1.49604e+07	3.75303e+07	2.80609e+07	1.98413e+07	1.48788e+07	2.37778e+07	1.61504e+07	3.0316e+07	2.45869e+07	1.97258e+07	1.22786e+07	17975111	1.61193e+07	PC 40:5	44.1934	42.543	28.6393	31.3282	35.8838	27.466	39.2429	26.2947	37.1846	30.2942	31.6394	25.6224	24.6767	30.0416
834.6	H85 C48 N1 O8 P1	-0.85ppm	PC 40:6	4.9406e+06	3.31704e+07	2.59008e+07	2.28432e+07	2.08994e+07	2.30558e+07	1.77356e+07	3.17952e+07	2.36429e+07	2.66628e+07	2.13377e+07	1.93344e+07	18791703	2.97843e+07	27916983	2.68169e+07	1.72625e+07	2.55032e+07	1.73117e+07	4.17113e+07	3.00884e+07	2.39949e+07	1.602e+07	2.35486e+07	1.89492e+07	3.32515e+07	2.64239e+07	2.1576e+07	1.56511e+07	2.0717e+07	1.80331e+07	PC 40:6	44.7045	41.1581	27.1935	33.027	35.9731	27.8014	39.8736	26.8456	35.2745	30.7236	30.0512	25.7839	27.0976	33.1378
832.584	H83 C48 N1 O8 P1	-0.85ppm	PC 40:7	193719	16937418	1.35397e+07	1.21387e+07	1.30519e+07	1.42539e+07	8.442e+06	1.58754e+07	1.23829e+07	1.39533e+07	13628345	1.25851e+07	9.09839e+06	1.49675e+07	1.46437e+07	1.49395e+07	10986333	1.20502e+07	7.49982e+06	20784868	1.59749e+07	1.15779e+07	1.02852e+07	1.15239e+07	8362602	1.64571e+07	1.34234e+07	1.09631e+07	8.68299e+06	9.7471e+06	8.58985e+06	PC 40:7	22.827	21.5155	14.4504	20.6257	22.2399	13.2332	19.9089	14.0603	18.46	19.6231	19.5608	12.4838	13.6173	17.3822
830.568	H81 C48 N1 O8 P1	-1.86ppm	PC 40:8	256840	1.90942e+06	2.04775e+06	1.5118e+06	1.72841e+06	1883882	1.11599e+06	2.15214e+06	2.17053e+06	1.90609e+06	2.01588e+06	1.99194e+06	1.47278e+06	1.96211e+06	2.43214e+06	2.83093e+06	1.46605e+06	1.72624e+06	1.32986e+06	2.67469e+06	2.11864e+06	1.85502e+06	1.2796e+06	1.58994e+06	1243671	2081578	1.8682e+06	2.08693e+06	1.28823e+06	2.11249e+06	1.31713e+06	PC 40:8	2.57337	3.25401	1.79971	2.73138	2.93935	1.74937	2.69895	2.46455	2.52173	2.90261	3.09604	2.02078	1.78512	2.88698
840.647	H91 C48 N1 O8 P1	-0.59ppm	PC 40:3	0	3.1687e+06	2.54456e+06	2.38838e+06	2.03453e+06	2.27403e+06	1.78888e+06	3.116e+06	2.14108e+06	2.82025e+06	2.10626e+06	2.10352e+06	1.72925e+06	2.67714e+06	2.56651e+06	2.7849e+06	1.45424e+06	2.3859e+06	1.28702e+06	3793212	2.84633e+06	2.02324e+06	1.59224e+06	2.1929e+06	1.4007e+06	3.06568e+06	2.35725e+06	1.96966e+06	1.28621e+06	1.7743e+06	1.47139e+06	PC 40:3	4.27054	4.04347	2.84323	3.21513	3.54809	2.80416	3.90771	2.43111	3.73115	3.03275	3.26948	2.37268	2.43564	3.04648
868.679	H95 C50 N1 O8 P1	-0.35ppm	PC 42:3	0	1.25246e+06	1.06922e+06	851460	900110	1.07159e+06	649321	1.23633e+06	812824	1.01811e+06	952628	934414	653202	975441	971771	1099440	669035	950408	497009	1684774	1.21262e+06	866778	765566	960309	516947	1247171	1.04051e+06	781074	563794	660551	603284	PC 42:3	1.68798	1.69906	1.01361	1.42243	1.67196	1.01784	1.55045	0.92293	1.34694	1.37166	1.45235	0.896251	0.887449	1.1535
866.663	H93 C50 N1 O8 P1	-0.45ppm	PC 42:4	0	2.53832e+06	2.14151e+06	1.97676e+06	2.03638e+06	2.40727e+06	1.33266e+06	2.52262e+06	1.96034e+06	2.30226e+06	2199384	2.08989e+06	1.35976e+06	2.27181e+06	2.29093e+06	2.26151e+06	1.82656e+06	2.15021e+06	1.14405e+06	3.40591e+06	2600320	1.87335e+06	1.62281e+06	2.10641e+06	1.26018e+06	2.48958e+06	2.24661e+06	1.66534e+06	1.40719e+06	1.53182e+06	1238178	PC 42:4	3.42095	3.403	2.35321	3.21806	3.75598	2.08901	3.16357	2.22589	3.04585	3.16683	3.2483	1.8657	2.06688	2.71937
864.647	H91 C50 N1 O8 P1	-0.56ppm	PC 42:5	0	5.08594e+06	4.10472e+06	3.43295e+06	3.73762e+06	4194664	2.1846e+06	4.43292e+06	3.52887e+06	4.27877e+06	3.97499e+06	3.86113e+06	2.56838e+06	4.19842e+06	4.17812e+06	3.76863e+06	3.05196e+06	3973343	1.99544e+06	5.79406e+06	4439164	3.08342e+06	3.05546e+06	3.88579e+06	2.12575e+06	4.54601e+06	3.90349e+06	2.94542e+06	2475304	2.69183e+06	2.23907e+06	PC 42:5	6.85444	6.52267	4.08672	5.90652	6.54478	3.42446	5.55923	4.00689	5.66075	5.72349	6.0013	3.52404	3.81969	4.95948
862.632	H89 C50 N1 O8 P1	0.32ppm	PC 42:6	101073	3.15297e+06	2.78997e+06	2.01258e+06	2.40499e+06	2.60873e+06	1535332	3.23974e+06	2.37303e+06	2.76395e+06	2.49387e+06	2.35981e+06	1.74392e+06	2.93193e+06	2.89445e+06	2.81952e+06	2.10362e+06	2.85214e+06	1.37117e+06	4.29738e+06	3.42101e+06	2.02634e+06	1.92951e+06	2.45232e+06	1563775	3.33569e+06	2.62481e+06	2314726	1.58229e+06	2.03134e+06	1.43626e+06	PC 42:6	4.24933	4.43345	2.39586	3.80057	4.07031	2.40671	4.06289	2.69448	3.65666	3.59085	3.66782	2.39281	2.66744	3.43575
860.616	H87 C50 N1 O8 P1	-0.68ppm	PC 42:7	0	2.80035e+06	2.38473e+06	1.89619e+06	2.17427e+06	2.45167e+06	1.50698e+06	2.89992e+06	2001753	2.38006e+06	2.37066e+06	2.1732e+06	1.49288e+06	2.45071e+06	2.36153e+06	2.31985e+06	1.7087e+06	2.05911e+06	1.07241e+06	3.33631e+06	2.63576e+06	1.54966e+06	1.65281e+06	1.9975e+06	1.2443e+06	2763703	2.26187e+06	1.62348e+06	1.34603e+06	1.57348e+06	1.28967e+06	PC 42:7	3.77409	3.7895	2.25731	3.43598	3.82525	2.36226	3.63673	2.27291	3.14879	3.41344	3.37778	2.04836	2.22964	2.80316
858.6	H85 C50 N1 O8 P1	-0.95ppm	PC 42:8	662427	2.40206e+06	2.26204e+06	1905620	2.04708e+06	2.14673e+06	1.27488e+06	2.47247e+06	2.22126e+06	2.16955e+06	2.11817e+06	2013986	1.62235e+06	2.17214e+06	2.32553e+06	2283907	1.39148e+06	2.30253e+06	1.48173e+06	2.70302e+06	2.18918e+06	1.93138e+06	1.54234e+06	2.3012e+06	1.73223e+06	2.26775e+06	1834559	1.66963e+06	1.83939e+06	2.49158e+06	1.5116e+06	PC 42:8	3.23732	3.59453	2.26853	3.23498	3.34947	1.99844	3.10067	2.52215	2.87028	3.0499	3.13031	2.226	1.9762	2.76044
856.584	H83 C50 N1 O8 P1	-1.55ppm	PC 42:9	0	1.63371e+06	1.5311e+06	1.18706e+06	1112057	1.15627e+06	663270	1690147	1.46958e+06	1469493	1.26946e+06	903799	788409	1.49855e+06	1.68871e+06	1.69081e+06	884366	1.33025e+06	756132	2.05388e+06	1.65313e+06	1.17378e+06	889129	1.24186e+06	791649	1.67021e+06	1.3375e+06	1.35799e+06	689630	1.34655e+06	815338	PC 42:9	2.20179	2.43302	1.41313	1.75737	1.80409	1.03971	2.11957	1.66865	1.94412	1.82786	1.40476	1.08177	1.36337	2.00452
872.71	H99 C50 N1 O8 P1	-0.59ppm	PC 42:1	0	1.67896e+06	1.46659e+06	1.3697e+06	1.0558e+06	1.32694e+06	791263	1.68068e+06	1326008	1.57791e+06	1.20803e+06	1.14507e+06	812830	1.42984e+06	1.44292e+06	1.62479e+06	854358	1.05318e+06	647386	2.09027e+06	1.61098e+06	1.27644e+06	809238	1.03366e+06	768408	1.66476e+06	1.585e+06	1.18137e+06	608370	744131	695557	PC 42:1	2.26277	2.33051	1.63055	1.66846	2.07037	1.24034	2.1077	1.50563	2.08755	1.73942	1.77977	1.11527	1.30085	1.71277
844.678	H95 C48 N1 O8 P1	-0.76ppm	PC 40:1	0	1766358	1363545	1.10765e+06	936882	1.09607e+06	708381	1.49166e+06	1.10605e+06	1.47636e+06	1001674	1.0075e+06	666474	1.17668e+06	1.34712e+06	1.43666e+06	694622	991730	550012	2002146	1.44215e+06	1.09221e+06	681673	932890	581180	1.51231e+06	1.2386e+06	992534	517429	643836	555057	PC 40:1	2.38056	2.16676	1.3186	1.48054	1.71016	1.11042	1.87066	1.25588	1.95319	1.44228	1.56595	0.914461	1.07053	1.59905
816.647	H91 C46 N1 O8 P1	-0.40ppm	PC 38:1	0	3.67775e+06	2563358	2.31023e+06	1.51925e+06	2.41927e+06	1.52191e+06	3.25244e+06	2.25289e+06	2.54297e+06	2.08614e+06	1.97201e+06	1489946	3.12812e+06	2.69088e+06	2.78185e+06	1.40403e+06	2293436	1.36019e+06	4.61504e+06	2.88402e+06	2.07656e+06	1.58348e+06	2.23449e+06	1.34393e+06	3.27666e+06	2.88567e+06	1.95705e+06	1.04379e+06	1.68416e+06	1.27234e+06	PC 38:1	4.95659	4.07335	2.7502	2.40086	3.7747	2.38567	4.07881	2.55807	3.36431	3.00378	3.06508	2.04434	2.84594	3.1941
788.615	H87 C44 N1 O8 P1	-1.13ppm	PC 36:1	0	9.82086e+07	7.39234e+07	69063398	5.18031e+07	59473102	5.20219e+07	8.99664e+07	6.53382e+07	79611892	5.52148e+07	5.08049e+07	51677195	8.64709e+07	7.85605e+07	8.57458e+07	4.73646e+07	7.73134e+07	4.74711e+07	1.19282e+08	8.75995e+07	6.82278e+07	4.36045e+07	7.31607e+07	5.10219e+07	9.72214e+07	7.65555e+07	6.79749e+07	3.73288e+07	5.58199e+07	5.11267e+07	PC 36:1	132.358	117.469	82.2159	81.8638	92.7937	81.5468	112.825	74.1889	105.325	79.5023	78.9655	70.9057	78.6705	93.2523
760.585	H83 C42 N1 O8 P1	-0.35ppm	PC 34:1	0	6.25151e+08	5.04531e+08	4.69764e+08	3.78128e+08	439025911	382292798	5.85519e+08	4.41447e+08	5.54466e+08	4.02258e+08	3.8168e+08	3.91846e+08	4.7899e+08	4.67766e+08	5.10264e+08	3.12219e+08	4.13007e+08	3.0453e+08	672206138	5.28218e+08	4.10727e+08	279909077	3.89383e+08	3.38444e+08	5.48571e+08	4.55352e+08	4.0479e+08	2.4042e+08	300462461	3.44328e+08	PC 34:1	842.53	801.734	559.226	597.551	684.996	599.262	734.286	501.246	733.55	579.2	593.241	537.647	435.781	555.244
732.554	H79 C40 N1 O8 P1	-0.01ppm	PC 32:1	119023	1.93574e+08	162011476	1.53505e+08	1.5392e+08	1.75365e+08	1.29182e+08	1.84175e+08	143682293	1.8288e+08	163273462	1.51469e+08	1.3473e+08	1.39592e+08	1.41e+08	1.55861e+08	1.1916e+08	1.2825e+08	9.54275e+07	1.95165e+08	1.59685e+08	1.26623e+08	1.0614e+08	1.19755e+08	106701571	1.56719e+08	1.36549e+08	1.24923e+08	9.23025e+07	9.37627e+07	1.0914e+08	PC 32:1	260.885	257.447	182.739	243.237	273.616	202.499	230.969	163.146	241.947	235.093	235.426	184.861	127	167.368
704.523	H75 C38 N1 O8 P1	0.01ppm	PC 30:1	0	1.45893e+07	1.3282e+07	1.27449e+07	1.50222e+07	1.75079e+07	10568122	1.38375e+07	1.11551e+07	1.4917e+07	1.64231e+07	1.51891e+07	1.07522e+07	9.48298e+06	1.06529e+07	1.24241e+07	1.13933e+07	9.53672e+06	7.28067e+06	1.39145e+07	1.2452e+07	9.93346e+06	1.02246e+07	8.92069e+06	8272768	1.12804e+07	10276469	9.9128e+06	8.80265e+06	6.96182e+06	8.28309e+06	PC 30:1	19.6623	21.106	15.172	23.7394	27.3169	16.566	17.3533	12.6662	19.735	23.6472	23.6082	14.753	8.62754	12.6451
676.491	H71 C36 N1 O8 P1	0.23ppm	PC 28:1	0	127916	74554.2	83083.1	175354	214389	146981	85286	29627.5	82979.8	218028	164251	118603	66251.3	56965.7	51702.6	164142	0	128908	101442	89880.1	15281.7	120676	51088.1	125570	0	58168.8	72174.1	100791	19800.5	100907	PC 28:1	0.172396	0.118472	0.0989055	0.27711	0.334503	0.230399	0.106955	0.0336408	0.109781	0.313932	0.255294	0.162733	0.0602749	0.067619
870.694	H97 C50 N1 O8 P1	-0.67ppm	PC 42:2	0	1.7457e+06	1.44554e+06	1.39795e+06	1.18374e+06	1.38007e+06	909587	1.52344e+06	1.2749e+06	1.53961e+06	1.31652e+06	1.25865e+06	870654	1457916	1.44014e+06	1.581e+06	1.01369e+06	1.39811e+06	616529	2.13587e+06	1.55273e+06	1.28625e+06	982153	1.18979e+06	807653	1.69743e+06	1.41431e+06	1.16206e+06	641163	937658	697781	PC 42:2	2.35272	2.29706	1.66418	1.87064	2.15327	1.42582	1.91051	1.4476	2.03688	1.89562	1.95631	1.19461	1.3264	1.70946
842.663	H93 C48 N1 O8 P1	-0.72ppm	PC 40:2	0	1.97653e+06	1.52729e+06	1511136	1.33726e+06	1.73743e+06	1.15263e+06	2.09427e+06	1.42867e+06	1.6603e+06	1.51893e+06	1.3502e+06	1.21201e+06	1.65709e+06	1.5315e+06	1.66112e+06	1.08914e+06	1638360	839426	2.31786e+06	1.74495e+06	1.4764e+06	978550	1400861	930188	1.73675e+06	1.43101e+06	1.2607e+06	873949	1.04425e+06	875522	PC 40:2	2.66382	2.42696	1.79892	2.11325	2.71086	1.80681	2.62638	1.6222	2.19655	2.18707	2.09861	1.66298	1.50761	1.81791
814.631	H89 C46 N1 O8 P1	-0.90ppm	PC 38:2	0	13858121	1.07989e+07	1.02141e+07	8.50891e+06	1.01613e+07	8198563	1.26609e+07	9.91996e+06	1.17932e+07	9.0414e+06	8.52281e+06	8159974	1.1221e+07	1.09761e+07	1.17366e+07	7.40018e+06	1.0899e+07	6.65638e+06	1.66764e+07	1.23914e+07	9.69556e+06	6783525	9.92891e+06	7510596	1.26731e+07	1.11452e+07	9.40815e+06	5.48261e+06	7.4268e+06	7.42497e+06	PC 38:2	18.6769	17.1602	12.1593	13.4465	15.8543	12.8516	15.8778	11.2637	15.6022	13.0185	13.2469	11.1962	10.2088	13.0287
786.6	H85 C44 N1 O8 P1	-0.77ppm	PC 36:2	0	2.37292e+08	1.96408e+08	1.83063e+08	1.46165e+08	1.70981e+08	1.54296e+08	2.26654e+08	1.73966e+08	2.16315e+08	1.57459e+08	150432609	1.58688e+08	1.93796e+08	1.93146e+08	2.09182e+08	1.26171e+08	1.82251e+08	1.27789e+08	2.71952e+08	2.19339e+08	1.6647e+08	1.13874e+08	1.71246e+08	1.41249e+08	2.2108e+08	1.874e+08	1.6447e+08	9.90974e+07	1.32487e+08	1.4455e+08	PC 36:2	319.804	312.106	217.926	230.982	266.775	241.867	284.242	197.532	286.181	226.721	233.816	217.734	176.314	229.266
730.538	H77 C40 N1 O8 P1	0.13ppm	PC 32:2	0	1.98705e+07	1.77694e+07	1.73655e+07	1.84264e+07	2.1872e+07	1.50288e+07	1.8802e+07	1.59114e+07	20546048	2.04818e+07	1.86768e+07	1.56397e+07	1.50771e+07	1.55966e+07	1.79371e+07	1.45832e+07	1.43861e+07	1.14353e+07	2.11666e+07	1.83924e+07	1.44838e+07	1.32214e+07	1.3331e+07	1.27753e+07	1.65429e+07	1.52079e+07	1.4454e+07	1.16354e+07	9.99742e+06	1.3387e+07	PC 32:2	26.7799	28.2368	20.6726	29.119	34.1261	23.5583	23.5792	18.0667	27.1821	29.4912	29.0292	21.459	13.717	18.5134
758.569	H81 C42 N1 O8 P1	0.13ppm	PC 34:2	0	1.42678e+08	1.22693e+08	115271693	1.04062e+08	1.20245e+08	9.82457e+07	1.34741e+08	1.06589e+08	1.37132e+08	1.13234e+08	1.06293e+08	1.03239e+08	1.05369e+08	1.10915e+08	1.21515e+08	8.30724e+07	9.81136e+07	7.56584e+07	1.48191e+08	1.24615e+08	9.92447e+07	7.49228e+07	9.13861e+07	8.57103e+07	1.19382e+08	1.06741e+08	9.61484e+07	6.49893e+07	7.13978e+07	87897578	PC 34:2	192.29	194.967	137.224	164.448	187.614	154.005	168.975	121.028	181.423	163.043	165.21	141.653	95.8642	131.657
702.507	H73 C38 N1 O8 P1	0.57ppm	PC 30:2	0	528664	505419	505126	608392	784933	453578	513677	484205	628653	709533	659085	441424	511872	482431	590708	467699	411346	422630	660659	520618	483257	529004	401006	441693	511555	479855	436041	421553	329877	526982	PC 30:2	0.712493	0.803144	0.601322	0.961434	1.2247	0.711005	0.644191	0.549795	0.831698	1.02164	1.02441	0.605672	0.465698	0.572652
###	PhosphatidylcholineOx																																			0	0	0	0	0	0	0	0	0	0	0	0	0	0
748.55	H79 C40 N1 O9 P1	1.25ppm	PCOx 32:1	0	45585.5	94188.5	89396.7	42319.8	111461	0	41754.3	39427	162583	0	0	0	0	86746.9	193138	72328.5	50859.8	0	75035.4	107608	27511.6	22521.4	61557.7	0	0	157988	225207	0	0	0	PCOx 32:1	0.0614367	0.149672	0.106421	0.0668774	0.173908	0	0.0523631	0.0447678	0.215095	0	0	0	0	0.10297
776.58	H83 C42 N1 O9 P1	-0.68ppm	PCOx 34:1	0	197026	407778	687896	323072	419313	193610	276934	368337	701765	318418	232753	143717	269797	497270	754497	158184	390305	121841	611103	766732	561483	268817	418394	172923	352973	650473	716769	158668	163147	253517	PCOx 34:1	0.265537	0.647986	0.818899	0.510547	0.65424	0.303493	0.347297	0.418232	0.928424	0.458481	0.361765	0.197193	0.24546	0.590266
772.549	H79 C42 N1 O9 P1	1.04ppm	PCOx 34:3	0	0	304946	431469	25499.6	0	0	0	224344	544246	70489.5	21055	34748.1	61192.9	292983	550897	27191.2	109172	89889	52899	334026	402540	42996.6	66747.4	0	133472	378607	633445	41482.4	31210.1	27167.8	PCOx 34:3	0	0.484579	0.513638	0.0402967	0	0	0	0.254733	0.720029	0.101496	0.0327255	0.0476774	0.0556728	0.347774
800.58	H83 C44 N1 O9 P1	0.01ppm	PCOx 36:3	0	171592	635005	913718	95381.3	70052.1	63186	52074.8	349229	1.01784e+06	86272	51467.6	0	23841.5	612493	1.10901e+06	0	150297	51381.1	177824	830300	799318	65975.2	138682	0	28429.2	769942	948270	0	0	0	PCOx 36:3	0.231258	1.00907	1.08773	0.15073	0.1093	0.0990471	0.0653058	0.396535	1.34658	0.124221	0.0799955	0	0.0216908	0.727037
798.564	H81 C44 N1 O9 P1	-0.21ppm	PCOx 36:4	0	102788	528956	711868	47326.9	154837	0	70421.1	316006	763398	95294.2	72073.4	54033.4	23094.4	483755	908683	72775.8	182326	21003.5	164730	680634	664755	65626.4	134072	42446.8	135369	495298	826242	44048.4	23198.3	56932.3	PCOx 36:4	0.13853	0.840546	0.847436	0.0747901	0.241586	0	0.0883135	0.358812	1.00996	0.137212	0.112023	0.0741386	0.0210111	0.574223
828.611	H87 C46 N1 O9 P1	0.02ppm	PCOx 38:3	0	37679.7	87826.4	189345	0	0	0	0	44192.4	167582	0	0	0	0	56214.1	96984.6	0	0	18733.4	0	150868	40433.1	22100.1	0	0	21151.3	54428.1	259268	0	0	0	PCOx 38:3	0.0507818	0.139562	0.225404	0	0	0	0	0.0501787	0.221708	0	0	0	0	0.0667268
826.595	H85 C46 N1 O9 P1	-0.29ppm	PCOx 38:4	0	109633	513043	572762	75022.9	72428.6	0	99399.1	344427	692553	73516.5	152107	0	23024.7	448439	841858	15922.5	89499.1	0	65289.9	573769	510654	27771.2	79864.5	18899.5	37298.9	498352	615664	0	61598.8	47702.2	PCOx 38:4	0.147755	0.815259	0.68184	0.118558	0.113008	0	0.124654	0.391084	0.916237	0.105854	0.236418	0	0.0209477	0.532303
824.579	H83 C46 N1 O9 P1	-0.66ppm	PCOx 38:5	0	0	555432	734322	0	0	0	0	384544	804656	0	0	0	0	465119	976693	22592.9	70034.1	0	0	709545	688190	36531.1	91995.9	31616.1	21835.3	624341	786932	28193.5	0	28864.1	PCOx 38:5	0	0.882618	0.874167	0	0	0	0	0.436634	1.06455	0	0	0	0	0.552102
822.564	H81 C46 N1 O9 P1	-0.62ppm	PCOx 38:6	95392.3	25744.4	479921	530607	25630.4	44097.1	13712.5	0	347312	598478	0	16695.8	54169.7	36198.8	384894	772616	18225.6	97257.8	83638	90367.7	524859	596388	19390.1	45536.4	73994.3	68076.7	416207	684207	92288.6	35873.3	49202.8	PCOx 38:6	0.0346963	0.762626	0.631656	0.0405034	0.0688031	0.021495	0	0.394359	0.791777	0	0.0259501	0.0743256	0.0329334	0.456875
854.627	H89 C48 N1 O9 P1	-0.36ppm	PCOx 40:4	0	0	26736.5	15460.8	0	0	0	0	0	12675.1	0	0	0	0	11126.1	17345.7	0	0	0	0	0	9223	0	0	0	0	3043.7	-1.8	0	0	0	PCOx 40:4	0	0.0424861	0.0184052	0	0	0	0	0	0.016769	0	0	0	0	0.0132068
852.611	H87 C48 N1 O9 P1	-0.65ppm	PCOx 40:5	0	0	111543	171388	0	0	0	0	73163.6	127785	0	0	10596.6	0	120291	311882	0	5951.2	2634.8	0	114109	158216	0	22162.4	0	0	167221	232450	0	16836.4	0	PCOx 40:5	0	0.177249	0.204027	0	0	0	0	0.0830744	0.169058	0	0	0.0145395	0	0.142786
850.595	H85 C48 N1 O9 P1	-1.40ppm	PCOx 40:6	68811.6	0	393998	346929	0	42446.6	0	0	207036	481740	29153.3	36421.2	43538.4	17572.3	310932	535537	0	75957.9	81272.7	24645.6	409340	315965	0	123319	0	27962.6	341476	385587	18471.8	66825.4	35423.9	PCOx 40:6	0	0.626089	0.412998	0	0.0662279	0	0	0.235082	0.637335	0.041977	0.056609	0.0597385	0.0159871	0.36908
848.578	H83 C48 N1 O9 P1	-1.76ppm	PCOx 40:7	145097	23788	233330	298964	130099	94003.2	75844.1	100000	277638	369025	67847.7	25421.1	123353	115703	364376	384807	182422	202102	229958	23703.6	412670	394866	94000.2	133280	187641	150913	265437	435293	161687	181904	89256.3	PCOx 40:7	0.0320596	0.370776	0.355898	0.205594	0.14667	0.118889	0.125408	0.315247	0.488214	0.097692	0.0395117	0.169251	0.105266	0.432519
846.563	H81 C48 N1 O9 P1	-1.56ppm	PCOx 40:8	0	0	0	70218.1	0	0	0	0	0	0	0	0	0	0	34539.7	167960	0	0	0	0	55520.8	111072	0	0	0	0	33899.8	154828	0	0	0	PCOx 40:8	0	0	0.0835905	0	0	0	0	0	0	0	0	0	0	0.0409991
774.564	H81 C42 N1 O9 P1	-0.83ppm	PCOx 34:2	0	0	527229	641308	131033	214800	104523	0	330829	755887	61474.4	93042.4	46597.1	0	522614	867852	27047.2	51016.6	24652.7	0	670667	691567	85622.9	132748	36563.2	0	609893	843878	38583.7	40710.5	75063.7	PCOx 34:2	0	0.837802	0.763439	0.20707	0.335145	0.163845	0	0.375643	1.00003	0.0885153	0.144615	0.0639353	0	0.620349
802.595	H85 C44 N1 O9 P1	-0.55ppm	PCOx 36:2	0	0	361405	581726	53639.6	41617.6	59568.5	0	223974	584840	0	50015.7	36655.1	0	302835	716705	0	142702	24608.7	60922.2	428959	589452	62542.1	136802	46303.2	38084.1	392262	658886	0	59801.5	0	PCOx 36:2	0	0.574297	0.692511	0.084766	0.0649344	0.0933765	0	0.254313	0.773735	0	0.0777388	0.050294	0	0.359469
###	PhosphatidylcholineOx2																																			0	0	0	0	0	0	0	0	0	0	0	0	0	0
766.559	H81 C40 N1 O10 P1	-0.66ppm	PCOx2 32:0	0	396650	455275	1.00276e+06	384543	565395	415815	176587	375698	810185	604987	534983	304548	337522	587993	1.05393e+06	380045	477596	372731	509809	814395	764734	479294	538044	377121	353674	774773	827575	388284	458977	398238	PCOx2 32:0	0.534574	0.723463	1.19373	0.607689	0.882166	0.65181	0.221453	0.426591	1.07186	0.871104	0.831517	0.417867	0.307075	0.697955
764.544	H79 C40 N1 O10 P1	0.43ppm	PCOx2 32:1	681292	0	84323.4	691077	0	0	54555.9	31831.1	89590.3	269122	85353.7	90732.5	0	64208	199434	526146	71289.1	47489.4	118505	156356	290752	210007	178667	99654.8	112640	89183.6	353412	512773	161522	92918.3	178678	PCOx2 32:1	0	0.133995	0.822686	0	0	0.085519	0.0399187	0.101726	0.356044	0.122898	0.141024	0	0.058416	0.23673
792.574	H83 C42 N1 O10 P1	-0.97ppm	PCOx2 34:1	0	0	0	315635	0	0	0	0	0	366668	0	0	0	0	0	504213	0	0	0	0	84720.1	179687	0	0	0	0	114946	300523	0	0	0	PCOx2 34:1	0	0	0.375745	0	0	0	0	0	0.485097	0	0	0	0	0
788.544	H79 C42 N1 O10 P1	0.09ppm	PCOx2 34:3	0	0	40134.2	525406	0	0	0	0	0	191780	0	18776.4	0	0	108554	443377	0	0	0	73456.7	194266	0	0	32913.2	0	0	186279	102278	0	0	0	PCOx2 34:3	0	0.0637759	0.625465	0	0	0	0	0	0.253722	0	0.0291839	0	0	0.128854
816.574	H83 C44 N1 O10 P1	-1.33ppm	PCOx2 36:3	173741	0	311140	620896	0	0	0	0	39197	735917	0	0	0	0	304752	815839	0	0	0	0	480351	437547	0	0	0	0	355716	523168	0	0	0	PCOx2 36:3	0	0.494422	0.73914	0	0	0	0	0.0445066	0.973606	0	0	0	0	0.361744
814.559	H81 C44 N1 O10 P1	-0.53ppm	PCOx2 36:4	0	0	596079	868456	89795.4	34652	190019	48280.5	342226	895854	155124	101849	114968	77901.6	480692	950896	54628.9	36665.5	119513	246080	701766	686219	54636.1	52741.1	111243	170091	538400	893598	34101.1	0	116547	PCOx2 36:4	0	0.947209	1.03385	0.141902	0.0540663	0.297863	0.0605475	0.388584	1.1852	0.223359	0.158302	0.157746	0.0708743	0.570588
812.543	H79 C44 N1 O10 P1	-1.32ppm	PCOx2 36:5	0	0	198705	585837	0	0	54369.2	60916.2	75977.8	306022	47234.4	63634.6	0	35254.7	142790	473711	0	0	60328.1	32064	296244	239841	48438.7	16924.9	27830.8	40804	253543	350898	0	0	36756.9	PCOx2 36:5	0	0.315755	0.697404	0	0	0.0852263	0.0763936	0.0862698	0.404862	0.0680115	0.0989065	0	0.0320745	0.169494
844.606	H87 C46 N1 O10 P1	-0.45ppm	PCOx2 38:3	0	0	64879.4	129786	0	0	0	0	0	68689.1	0	0	0	0	42548.8	167623	0	0	0	0	91933.9	50847.7	0	0	0	29645.6	76030.6	187489	0	0	0	PCOx2 38:3	0	0.103098	0.154502	0	0	0	0	0	0.0908746	0	0	0	0	0.050506
840.576	H83 C46 N1 O10 P1	0.87ppm	PCOx2 38:5	-1.7	0	545434	1.375e+06	0	41789.7	0	73865.3	338027	1.04559e+06	39976.3	0	0	36791.4	501289	1.33286e+06	0	0	0	301894	809193	731384	63927.5	30505.6	61971.1	80062.6	593395	1.10696e+06	0	0	42107.9	PCOx2 38:5	0	0.866731	1.63685	0	0.065203	0	0.0926328	0.383816	1.3833	0.0575608	0	0	0.0334725	0.595036
838.559	H81 C46 N1 O10 P1	-0.62ppm	PCOx2 38:6	0	608372	658098	1.52317e+06	312043	350259	435958	761220	622392	1.01656e+06	432413	477118	335391	559277	859593	1.43831e+06	409775	412601	475782	301066	1.03637e+06	883419	438496	476468	564298	662815	1.02509e+06	1.22249e+06	428095	324203	418262	PCOx2 38:6	0.819918	1.04576	1.81324	0.493117	0.546496	0.683385	0.954628	0.706701	1.34489	0.62262	0.741578	0.460186	0.508826	1.02035
836.543	H79 C46 N1 O10 P1	-0.72ppm	PCOx2 38:7	0	108587	217848	826801	55740.6	95670.8	230058	186476	230544	465196	221308	91865.8	43388.2	118178	357112	606433	134802	52260.8	253569	479010	458784	411561	211787	93100.3	259044	271689	520226	547237	176394	0	199931	PCOx2 38:7	0.146345	0.346175	0.984258	0.0880861	0.149272	0.360627	0.233855	0.261774	0.615446	0.318656	0.142786	0.0595324	0.107517	0.423896
868.606	H87 C48 N1 O10 P1	-0.20ppm	PCOx2 40:5	0	0	51148.7	301197	0	0	0	0	0	337052	0	0	0	0	52381.3	356790	0	0	0	0	166696	218845	0	0	0	0	176553	254078	0	0	0	PCOx2 40:5	0	0.0812787	0.358557	0	0	0	0	0	0.445915	0	0	0	0	0.0621773
866.59	H85 C48 N1 O10 P1	-1.07ppm	PCOx2 40:6	0	0	234471	289809	0	0	16488.5	0	52439.9	409204	0	38564.3	0	0	196488	485067	0	0	18021.8	0	394481	368952	23898.4	0	21975.3	0	302314	445879	0	27566.3	49337.5	PCOx2 40:6	0	0.372591	0.345	0	0	0.0258465	0	0.0595434	0.54137	0	0.05994	0	0	0.233234
864.574	H83 C48 N1 O10 P1	-1.09ppm	PCOx2 40:7	0	46703.3	216184	275732	0	0	33208.5	55738.2	54737.1	283288	66521.5	0	0	45113	86324.5	374706	15690.6	29958.5	0	0	222432	264204	27483.3	0	0	0	175385	249885	45311.9	17338	0	PCOx2 40:7	0.0629431	0.343531	0.328243	0	0	0.0520559	0.0699	0.0621518	0.374786	0.0957825	0	0	0.0410435	0.102468
862.559	H81 C48 N1 O10 P1	-0.81ppm	PCOx2 40:8	0	92291.9	58538	112224	0	30208.9	0	14808	119275	47742.7	36842.3	48577.9	0	82762.9	25682.8	166423	0	61888.1	19875.8	45510.1	100997	29750.1	7783.2	17772.8	0	0	108316	129962	26557	29115.2	33916.4	PCOx2 40:8	0.124384	0.0930208	0.133596	0	0.0471339	0	0.0185704	0.135432	0.0631628	0.0530482	0.0755041	0	0.0752971	0.0304858
762.528	H77 C40 N1 O10 P1	0.20ppm	PCOx2 32:2	0	0	0	521463	0	0	0	0	0	64531.2	0	0	0	0	0	112215	0	0	0	0	46286.5	0	0	0	0	0	0	96545.5	0	0	0	PCOx2 32:2	0	0	0.620771	0	0	0	0	0	0.0853737	0	0	0	0	0
790.559	H81 C42 N1 O10 P1	0.34ppm	PCOx2 34:2	0	23454	0	1780548	0	0	82170.5	0	0	575070	0	0	0	0	89482.6	905540	0	0	0	336233	236929	0	59945.4	17169.8	0	0	418124	630715	0	0	0	PCOx2 34:2	0.0316095	0	2.11964	0	0	0.128806	0	0	0.760809	0	0	0	0	0.106217
																																				0	0	0	0	0	0	0	0	0	0	0	0	0	0
###	PhosphatidylcholineOx3																																			0	0	0	0	0	0	0	0	0	0	0	0	0	0
830.554	H81 C44 N1 O11 P1	0.06ppm	PCOx3 36:4	0	0	270328	285485	0	0	0	0	116748	461780	0	0	0	0	165434	434056	0	0	0	0	257994	251659	0	0	0	0	225707	369746	0	0	0	PCOx3 36:4	0	0.429569	0.339853	0	0	0	0	0.132562	0.610928	0	0	0	0	0.196372
856.569	H83 C46 N1 O11 P1	-0.34ppm	PCOx3 38:5	0	0	293014	644330	0	0	0	0	213264	672226	0	0	0	0	226987	749133	0	0	0	0	483147	509907	0	0	0	0	337240	620252	0	0	0	PCOx3 38:5	0	0.465618	0.767036	0	0	0	0	0.242152	0.889344	0	0	0	0	0.269436
854.554	H81 C46 N1 O11 P1	-0.56ppm	PCOx3 38:6	0	0	142493	269789	0	0	0	0	88726.5	352206	0	0	0	0	99886.8	517326	0	0	0	0	233946	231775	0	0	0	0	215017	355884	0	0	0	PCOx3 38:6	0	0.22643	0.321168	0	0	0	0	0.100745	0.465963	0	0	0	0	0.118567
880.569	H83 C48 N1 O11 P1	-0.48ppm	PCOx3 40:7	0	0	47706.8	50171.6	0	0	0	0	0	157300	0	0	0	0	21264.2	208054	0	0	0	0	68272.7	125825	0	0	0	0	35974.3	139050	0	0	0	PCOx3 40:7	0	0.0758093	0.0597263	0	0	0	0	0	0.208105	0	0	0	0	0.0252409
878.553	H81 C48 N1 O11 P1	-1.20ppm	PCOx3 40:8	0	0	0	0	0	0	0	0	0	0	0	0	0	0	0	24489.9	0	0	0	0	0	0	0	0	0	0	0	18492.6	0	0	0	PCOx3 40:8	0	0	0	0	0	0	0	0	0	0	0	0	0	0
																																				0	0	0	0	0	0	0	0	0	0	0	0	0	0
																																				0	0	0	0	0	0	0	0	0	0	0	0	0	0
###	PhosphatidylcholineOx4																																			0	0	0	0	0	0	0	0	0	0	0	0	0	0
848.565	H83 C44 N1 O12 P1	0.06ppm	PCOx4 36:3	0	0	0	75076	0	0	0	0	0	65204.1	0	0	0	0	0	101331	0	0	0	0	0	0	0	0	0	0	0	103350	0	0	0	PCOx4 36:3	0	0	0.0893735	0	0	0	0	0	0.086264	0	0	0	0	0
846.549	H81 C44 N1 O12 P1	0.05ppm	PCOx4 36:4	0	0	56582.2	284613	0	0	0	0	0	369142	0	0	0	0	33736.5	402151	0	0	0	0	107113	168805	0	0	0	0	0	253202	0	0	0	PCOx4 36:4	0	0.0899129	0.338815	0	0	0	0	0	0.488369	0	0	0	0	0.0400456
874.582	H85 C46 N1 O12 P1	1.83ppm	PCOx4 38:4	49423.3	0	88369.8	464681	0	0	0	0	0	648188	0	0	0	0	45411	647266	0	0	40944.7	0	207438	262630	0	0	32500	0	185512	389713	66544.5	25692	0	PCOx4 38:4	0	0.140425	0.553175	0	0	0	0	0	0.857543	0	0	0	0	0.0539034
872.566	H83 C46 N1 O12 P1	1.24ppm	PCOx4 38:5	0	0	294173	555364	0	0	0	0	95769.1	625562	0	0	31288.6	0	205010	860975	0	0	160022	21753.4	385294	453272	0	0	0	34653.6	360090	597224	0	24529.3	0	PCOx4 38:5	0	0.46746	0.661128	0	0	0	0	0.108742	0.827609	0	0	0.0429307	0	0.243349
870.549	H81 C46 N1 O12 P1	-0.01ppm	PCOx4 38:6	0	0	22649	125442	0	0	0	0	55266.5	273622	0	0	0	0	42208.7	397686	0	0	19552.5	0	69597.5	212027	0	0	16431.6	33001	22566.8	266809	0	22037.4	0	PCOx4 38:6	0	0.0359908	0.149331	0	0	0	0	0.0627529	0.361998	0	0	0	0	0.0501023
900.596	H87 C48 N1 O12 P1	-0.48ppm	PCOx4 40:5	0	0	43556.4	167721	0	0	0	0	0	176561	0	0	0	0	0	170702	0	0	0	0	67230.1	59384.5	0	0	0	0	43774.4	159394	0	0	0	PCOx4 40:5	0	0.069214	0.199661	0	0	0	0	0	0.233588	0	0	0	0	0
898.58	H85 C48 N1 O12 P1	-0.51ppm	PCOx4 40:6	0	0	29956.6	202854	0	0	0	0	0	330776	0	0	0	0	65524.4	436096	0	0	0	0	118959	125313	0	0	0	0	92803.9	191835	0	0	0	PCOx4 40:6	0	0.047603	0.241485	0	0	0	0	0	0.437611	0	0	0	0	0.0777783
896.564	H83 C48 N1 O12 P1	-0.27ppm	PCOx4 40:7	0	0	-1.8	86031.2	0	0	0	0	0	105188	0	-1.8	0	0	0	226244	0	0	0	0	11694.4	30108.9	0	0	0	0	53848.3	43938.7	0	0	0	PCOx4 40:7	0	-2.86032e-06	0.102415	0	0	0	0	0	0.139163	0	-2.79772e-06	0	0	0
																																				0	0	0	0	0	0	0	0	0	0	0	0	0	0
																																				0	0	0	0	0	0	0	0	0	0	0	0	0	0
###	PhosphatidylcholineOx5																																			0	0	0	0	0	0	0	0	0	0	0	0	0	0
864.561	H83 C44 N1 O13 P1	1.75ppm	PCOx5 36:3	0	0	25100.2	35813.9	0	25590.3	0	0	0	24466.6	0	0	0	0	0	6960.3	0	0	26759	0	4745.1	0	0	0	0	0	0	24121.6	0	25457.3	0	PCOx5 36:3	0	0.0398859	0.0426343	0	0.0399276	0	0	0	0.0323689	0	0	0	0	0
890.575	H85 C46 N1 O13 P1	-0.01ppm	PCOx5 38:4	0	0	77273.2	142340	0	0	0	0	0	232422	0	0	0	0	59875.2	192908	0	0	0	0	87698.2	204240	0	21268.5	0	0	67629.7	203553	0	0	0	PCOx5 38:4	0	0.122792	0.169447	0	0	0	0	0	0.30749	0	0	0	0	0.0710726
888.559	H83 C46 N1 O13 P1	-0.53ppm	PCOx5 38:5	0	0	104751	165287	0	0	0	0	72898.2	292492	0	0	0	0	47027	383116	0	0	0	0	111033	118715	0	0	0	0	96583.8	274731	0	0	0	PCOx5 38:5	0	0.166456	0.196764	0	0	0	0	0.082773	0.386962	0	0	0	0	0.0558216
916.591	H87 C48 N1 O13 P1	-0.55ppm	PCOx5 40:5	0	0	0	34167.6	0	0	0	0	0	0	0	0	0	0	0	16363.5	0	0	0	0	40612.1	37516.1	0	0	0	0	32444.2	41572.5	0	0	0	PCOx5 40:5	0	0	0.0406745	0	0	0	0	0	0	0	0	0	0	0
914.575	H85 C48 N1 O13 P1	-0.77ppm	PCOx5 40:6	0	0	0	34414.1	0	0	0	0	0	64993.3	0	0	0	0	0	45137.5	0	0	0	0	36804.3	18835.1	0	0	0	0	19922.7	121834	0	0	0	PCOx5 40:6	0	0	0.0409679	0	0	0	0	0	0.0859851	0	0	0	0	0
912.559	H83 C48 N1 O13 P1	-0.66ppm	PCOx5 40:7	0	0	0	22447	0	0	0	0	0	0	0	0	0	0	0	127455	0	0	0	0	0	53515	0	0	0	0	0	31836	0	0	0	PCOx5 40:7	0	0	0.0267218	0	0	0	0	0	0	0	0	0	0	0
																																				0	0	0	0	0	0	0	0	0	0	0	0	0	0
																																				0	0	0	0	0	0	0	0	0	0	0	0	0	0
###	PhosphatidylcholineOx6																																			0	0	0	0	0	0	0	0	0	0	0	0	0	0
906.57	H85 C46 N1 O14 P1	-0.22ppm	PCOx6 38:4	0	0	0	20954.1	0	0	0	0	0	11443.9	0	0	0	0	26426.3	186432	0	0	0	0	0	63822	0	0	0	0	25325.4	82601.7	0	0	0	PCOx6 38:4	0	0	0.0249446	0	0	0	0	0	0.0151401	0	0	0	0	0.0313683
904.555	H83 C46 N1 O14 P1	0.32ppm	PCOx6 38:5	0	0	33497	48303	0	0	0	0	0	83422.7	0	0	0	0	0	113238	0	0	0	0	25568.9	52756.3	0	0	0	0	49955.5	69556.7	0	0	0	PCOx6 38:5	0	0.053229	0.0575018	0	0	0	0	0	0.110367	0	0	0	0	0
930.57	H85 C48 N1 O14 P1	-0.25ppm	PCOx6 40:6	0	0	0	0	0	0	0	0	0	35514.4	0	0	0	0	0	24104.1	0	0	0	0	45085	0	0	0	0	0	0	61864.2	0	0	0	PCOx6 40:6	0	0	0	0	0	0	0	0	0.046985	0	0	0	0	0
																																				0	0	0	0	0	0	0	0	0	0	0	0	0	0
																																				0	0	0	0	0	0	0	0	0	0	0	0	0	0
																																				0	0	0	0	0	0	0	0	0	0	0	0	0	0
																																				0	0	0	0	0	0	0	0	0	0	0	0	0	0
###	etherPhosphatidylcholine																																			0	0	0	0	0	0	0	0	0	0	0	0	0	0
692.559	H79 C38 N1 O7 P1	-0.20ppm	PCO 30:0	0	4.355e+06	3.86881e+06	3.59594e+06	3.5171e+06	4.25586e+06	3.1896e+06	4.33091e+06	3.23806e+06	4.29839e+06	4.04998e+06	3.5089e+06	3.28948e+06	3.13736e+06	3.2599e+06	3.60626e+06	2.96549e+06	3.43895e+06	2.23125e+06	4.42158e+06	3.72797e+06	3.12501e+06	2.4625e+06	2.89799e+06	2.44117e+06	3.70465e+06	3.2575e+06	3.02729e+06	2.16072e+06	2.64609e+06	2.53647e+06	PCO 30:0	5.86934	6.14779	4.28075	5.55803	6.64027	4.99985	5.43129	3.67669	5.6867	5.83145	5.45384	4.51345	2.85435	3.86954
690.543	H77 C38 N1 O7 P1	0.07ppm	PCO 30:1	0	2.36247e+06	1.99263e+06	1.69828e+06	1833627	2.22454e+06	1.42249e+06	2.39154e+06	1.61255e+06	1.97256e+06	2018036	1.84223e+06	1.51217e+06	2.09671e+06	2.12695e+06	2.09798e+06	1.73177e+06	2.24108e+06	1.22001e+06	2.83328e+06	2.2765e+06	1.784e+06	1.49037e+06	2059627	1.37087e+06	2.35597e+06	1.99463e+06	1.64352e+06	1.26128e+06	1.782e+06	1.36718e+06	PCO 30:1	3.18396	3.16643	2.0217	2.89766	3.47087	2.22983	2.99918	1.83099	2.60966	2.90571	2.86336	2.07483	1.90757	2.52472
688.527	H75 C38 N1 O7 P1	-0.22ppm	PCO 30:2	0	322847	271793	278768	267614	350422	250897	337919	181256	300164	326693	246204	180071	313074	325015	320831	236069	319624	244056	438070	340438	173803	259661	285070	242226	386111	284734	227551	181743	247320	226432	PCO 30:2	0.435109	0.431898	0.331857	0.422908	0.546751	0.393293	0.423776	0.205809	0.397112	0.470396	0.382672	0.247073	0.284832	0.385797
720.59	H83 C40 N1 O7 P1	-0.24ppm	PCO 32:0	0	14318505	1.2057e+07	1.17539e+07	1.07992e+07	1.23917e+07	9.54124e+06	1.43177e+07	1.04077e+07	1.39489e+07	1.15319e+07	1.07068e+07	9.5716e+06	9.91454e+06	1.04938e+07	11297292	7.50341e+06	9.14744e+06	6.08718e+06	1.44842e+07	1.20958e+07	9.33249e+06	6.93556e+06	8.7204e+06	6.79296e+06	1.13589e+07	1.00625e+07	8899956	5.52103e+06	6.91487e+06	6.89663e+06	PCO 32:0	19.2974	19.1593	13.9923	17.0659	19.3343	14.9563	17.9555	11.8175	18.4541	16.6045	16.6415	13.1331	9.02017	12.4563
718.574	H81 C40 N1 O7 P1	-0.12ppm	PCO 32:1	63424.3	1.74807e+07	1.45878e+07	1.36006e+07	1.35751e+07	1.5678e+07	1.23596e+07	1.70785e+07	1.28418e+07	1.63028e+07	1.41569e+07	1.3101e+07	1.28757e+07	1.31158e+07	1.27919e+07	1.43036e+07	1.05238e+07	1.41587e+07	8.81329e+06	1.83562e+07	1.47565e+07	11395191	9.25485e+06	1.2643e+07	9.86347e+06	1.4862e+07	1.25913e+07	1.11258e+07	7.87048e+06	1.06357e+07	1.02847e+07	PCO 32:1	23.5591	23.181	16.1907	21.4526	24.4619	19.3743	21.4177	14.5813	21.5683	20.3842	20.3627	17.6666	11.9326	15.1842
716.559	H79 C40 N1 O7 P1	0.14ppm	PCO 32:2	0	4.57002e+06	3.56843e+06	3.47976e+06	3.51087e+06	4.02227e+06	3.11515e+06	4.42613e+06	3.15484e+06	3.94679e+06	3.84237e+06	3.24563e+06	3.14464e+06	3.8697e+06	3.67543e+06	3.87912e+06	3.07096e+06	4.05275e+06	2.59503e+06	5.64213e+06	4.09464e+06	3.23001e+06	2.71898e+06	3.65889e+06	3.05765e+06	4.61136e+06	3.5557e+06	3.21837e+06	2.42907e+06	3.24446e+06	2.75706e+06	PCO 32:2	6.15912	5.67047	4.14244	5.54818	6.2758	4.88315	5.55071	3.5822	5.22154	5.53252	5.04464	4.31472	3.52063	4.36278
714.543	H77 C40 N1 O7 P1	0.10ppm	PCO 32:3	0	627862	463731	470906	472275	528520	364013	478556	353320	574412	466851	485077	323561	551534	479582	615270	374885	454395	303541	756704	495982	329542	412123	479535	384647	615024	438324	438374	341189	366267	466759	PCO 32:3	0.846184	0.736899	0.560586	0.74633	0.824631	0.570608	0.600146	0.401181	0.759938	0.672206	0.753949	0.443954	0.501781	0.56927
712.527	H75 C40 N1 O7 P1	-0.22ppm	PCO 32:4	0	194918	144361	71164.1	91016.9	108436	103913	192393	113805	151193	71990.3	96601.9	116530	194338	149018	171762	131301	179308	114274	267290	166553	85600.6	99340.4	149623	84183.7	227992	138178	42049.8	69442.4	113165	115609	PCO 32:4	0.262695	0.2294	0.0847166	0.143833	0.169189	0.162889	0.241276	0.129221	0.200025	0.103657	0.150147	0.15989	0.176807	0.176886
710.512	H73 C40 N1 O7 P1	0.06ppm	PCO 32:5	0	162625	155832	155094	131975	164603	141787	200455	141147	166817	245904	167690	146693	213742	111212	150777	84374	78932.3	99467.9	273107	159213	49152.7	116889	117172	76280	201799	174979	73928.6	116428	43079.2	88717.9	PCO 32:5	0.219174	0.247627	0.18463	0.208559	0.256824	0.222258	0.251386	0.160267	0.220697	0.35407	0.260639	0.201275	0.19446	0.13201
748.622	H87 C42 N1 O7 P1	0.16ppm	PCO 34:0	0	3.63762e+06	3.14698e+06	2.95402e+06	2.28079e+06	2.54902e+06	2.5475e+06	3.58609e+06	2.7139e+06	3.45263e+06	2.4128e+06	1967038	2.62752e+06	3.10173e+06	3.53844e+06	3.74018e+06	1.66408e+06	2.75389e+06	1.84175e+06	4.28422e+06	3.75059e+06	3.04575e+06	1.50528e+06	2.80733e+06	2.10406e+06	3.49119e+06	3.44088e+06	2.89956e+06	1.23198e+06	2.2929e+06	2.07984e+06	PCO 34:0	4.9025	5.00076	3.51659	3.6043	3.97714	3.99333	4.49724	3.08152	4.56777	3.47412	3.05734	3.60519	2.82193	4.20018
746.606	H85 C42 N1 O7 P1	-0.12ppm	PCO 34:1	0	3.21881e+07	2.8108e+07	2.68449e+07	2.31585e+07	26639183	2.60126e+07	3.10531e+07	2.45639e+07	3.24267e+07	2.47455e+07	2.26473e+07	2.63994e+07	2.36673e+07	2.58402e+07	2.8275e+07	1.80723e+07	2.64999e+07	1.81948e+07	33855246	2.88982e+07	2.28381e+07	1.56697e+07	2.41055e+07	20133725	2.68672e+07	2.48939e+07	2.23003e+07	1.3267e+07	1.95011e+07	2.09519e+07	PCO 34:1	43.3807	44.6655	31.9573	36.5971	41.5642	40.776	38.943	27.8913	42.9001	35.6304	35.2004	36.2223	21.5324	30.6726
744.59	H83 C42 N1 O7 P1	0.00ppm	PCO 34:2	0	1.34377e+07	1.04806e+07	9.8896e+06	8.84143e+06	1.02375e+07	8.68161e+06	1.27561e+07	8966832	1.17307e+07	9.27418e+06	8759315	8.73979e+06	1.07467e+07	1.05759e+07	1.14864e+07	7.62046e+06	1.16813e+07	7.07998e+06	1.49938e+07	1.18813e+07	9.10667e+06	6.60223e+06	10717781	7.80964e+06	1.23046e+07	1.06444e+07	9048819	5.73512e+06	8.57457e+06	7.9757e+06	PCO 34:2	18.1102	16.6543	11.773	13.972	15.9732	13.6088	15.9972	10.1815	15.5195	13.3536	13.6145	11.9918	9.77725	12.5538
742.575	H81 C42 N1 O7 P1	0.14ppm	PCO 34:3	0	2.47487e+06	1.94975e+06	1.78397e+06	1.69267e+06	1.90545e+06	1.51021e+06	2.40002e+06	1.53545e+06	2.20034e+06	1.66817e+06	1.48797e+06	1.6427e+06	1.9626e+06	2.05842e+06	2.17715e+06	1.42027e+06	2.08238e+06	1.3628e+06	2.87581e+06	2.07901e+06	1.85883e+06	1.25663e+06	1.91677e+06	1.28792e+06	2.31233e+06	1.87352e+06	1661601	1.12709e+06	1.692e+06	1.43079e+06	PCO 34:3	3.33544	3.09828	2.12371	2.6749	2.973	2.36732	3.00981	1.74344	2.91102	2.40195	2.31273	2.25392	1.78556	2.44338
740.559	H79 C42 N1 O7 P1	-0.11ppm	PCO 34:4	0	940643	652217	740656	617304	620282	518827	902039	704790	730503	575089	698034	688053	798322	795276	886686	524678	679997	531327	1.12862e+06	781928	637858	527668	760549	575244	938476	665677	682110	477113	725826	664904	PCO 34:4	1.26773	1.03642	0.881707	0.975517	0.967803	0.813286	1.13123	0.800261	0.966444	0.828055	1.08495	0.94407	0.726307	0.944002
738.543	H77 C42 N1 O7 P1	-0.57ppm	PCO 34:5	0	2.86286e+06	2.23041e+06	2.05705e+06	1.99127e+06	2.0328e+06	1.76605e+06	2.56238e+06	1.99923e+06	2.43414e+06	1952749	2.01931e+06	1969120	2.52358e+06	2.26417e+06	2.06247e+06	1.65887e+06	1883974	1.69269e+06	3.29645e+06	2.24745e+06	1.63026e+06	1.58854e+06	1.68846e+06	1.79371e+06	2.59598e+06	1.9724e+06	1.63392e+06	1.37066e+06	1.34921e+06	1.86586e+06	PCO 34:5	3.85834	3.54428	2.4488	3.14678	3.1717	2.76836	3.21342	2.27005	3.22033	2.81171	3.13859	2.70181	2.29594	2.6876
736.528	H75 C42 N1 O7 P1	0.53ppm	PCO 34:6	0	663715	499793	448470	586250	661638	419734	585413	395675	806507	468365	443104	378696	593312	498131	606239	323218	478908	406908	1.03149e+06	533518	511376	522952	504039	501786	649059	561332	447081	434293	337157	451440	PCO 34:6	0.894505	0.794204	0.533876	0.926444	1.03233	0.657953	0.734153	0.449273	1.067	0.674385	0.688711	0.519604	0.539791	0.591287
776.652	H91 C44 N1 O7 P1	-1.21ppm	PCO 36:0	0	243632	173778	239098	134123	204985	235233	288412	194082	280168	143964	172857	183040	217724	243620	262814	104847	269735	125830	243742	183852	274136	122439	207258	94064.8	310013	233182	196088	21033.7	109229	171771	PCO 36:0	0.328349	0.276144	0.284633	0.211953	0.319831	0.36874	0.361691	0.220372	0.370658	0.20729	0.26867	0.251147	0.198083	0.28918
774.636	H89 C44 N1 O7 P1	-0.82ppm	PCO 36:1	0	2.43902e+06	1.94815e+06	1900061	1.72393e+06	1.88199e+06	1.86077e+06	2.24295e+06	1.97688e+06	2.28102e+06	1.91567e+06	1.69955e+06	1.93933e+06	1.66158e+06	1.98319e+06	2415876	1.29541e+06	2.39652e+06	1.30128e+06	2529240	2.30451e+06	1.76665e+06	1.24038e+06	2.08206e+06	1.47262e+06	2.04495e+06	2090259	1.79793e+06	1.19622e+06	1732394	1.43014e+06	PCO 36:1	3.28712	3.09574	2.26191	2.7243	2.9364	2.91684	2.81283	2.24467	3.01776	2.75832	2.64159	2.66093	1.51169	2.35407
772.621	H87 C44 N1 O7 P1	-0.81ppm	PCO 36:2	0	5.08213e+06	4.02664e+06	3.95899e+06	3.08443e+06	4.06152e+06	3.38736e+06	4.87926e+06	3.61521e+06	4.62201e+06	3664200	3.33215e+06	3.35911e+06	4.30534e+06	4.30598e+06	4.89356e+06	2.95691e+06	5.059e+06	2733230	6652646	4.94659e+06	4.00441e+06	2.73931e+06	4.38658e+06	3.13219e+06	4.97681e+06	4.46966e+06	3.80927e+06	2.24872e+06	3.64195e+06	2.94898e+06	PCO 36:2	6.84931	6.39859	4.71294	4.87429	6.33705	5.30984	6.11897	4.10492	6.11484	5.27598	5.17912	4.609	3.91696	5.11125
770.605	H85 C44 N1 O7 P1	-0.95ppm	PCO 36:3	0	4.32967e+06	3.56359e+06	3.20469e+06	2.74569e+06	3.15592e+06	2.90447e+06	3.92967e+06	3.0918e+06	4.09585e+06	3.01616e+06	2.82509e+06	2.89669e+06	3.45535e+06	3.61029e+06	3.93821e+06	2.29518e+06	3.904e+06	2235288	4.66411e+06	4029948	3.18066e+06	2.16134e+06	3.52447e+06	2.58606e+06	3.97976e+06	3.37335e+06	3.20388e+06	1.77629e+06	2.87913e+06	2.74309e+06	PCO 36:3	5.8352	5.66278	3.81499	4.33897	4.92407	4.55289	4.92811	3.51062	5.41874	4.34289	4.39101	3.97451	3.14366	4.28546
768.589	H83 C44 N1 O7 P1	-1.28ppm	PCO 36:4	0	1.37391e+07	1.15197e+07	1.02642e+07	6.63306e+06	7.63083e+06	1.22907e+07	1.32991e+07	9.99613e+06	1.27551e+07	6.86707e+06	6.77666e+06	1.3115e+07	8.77975e+06	9.67809e+06	1.03859e+07	4.40484e+06	8.84954e+06	8.08214e+06	1.28486e+07	1.09798e+07	8.37397e+06	3.89805e+06	8.02514e+06	8.90312e+06	1.04377e+07	9.31739e+06	8.04922e+06	3.30091e+06	6775194	9.20233e+06	PCO 36:4	18.5165	18.3056	12.219	10.4821	11.9061	19.2663	16.678	11.3502	16.8748	9.88771	10.5329	17.995	7.98775	11.488
766.574	H81 C44 N1 O7 P1	-1.17ppm	PCO 36:5	0	1.1981e+07	8.06403e+06	6.87523e+06	4.89582e+06	5660070	10464341	10845442	7.357e+06	8.47311e+06	5.15164e+06	5.28389e+06	1.15563e+07	8.61044e+06	7.45709e+06	7.22194e+06	3.41083e+06	6.15187e+06	7.98182e+06	1.14422e+07	8.01296e+06	6070390	3414195	6.03929e+06	9.12188e+06	9.74863e+06	6718913	5.73544e+06	2.92541e+06	4.82039e+06	8.95377e+06	PCO 36:5	16.147	12.8143	8.18455	7.73681	8.8312	16.4034	13.601	8.35358	11.2098	7.41771	8.21269	15.8563	7.83371	8.85166
764.558	H79 C44 N1 O7 P1	-0.64ppm	PCO 36:6	0	2.73717e+06	2.22716e+06	1.85535e+06	1.76336e+06	2.12186e+06	1.96349e+06	2.40623e+06	1.82278e+06	2.47427e+06	1967266	1.79338e+06	2.19503e+06	2.72916e+06	2.19101e+06	2219053	1.59365e+06	2.05422e+06	1.95198e+06	3.35052e+06	2.36584e+06	1.82151e+06	1.55527e+06	1.88587e+06	2.24355e+06	2.69798e+06	2.00221e+06	1.68203e+06	1.41647e+06	1469238	2.17798e+06	PCO 36:6	3.68895	3.5391	2.20869	2.78661	3.31066	3.07787	3.0176	2.0697	3.27342	2.83261	2.78743	3.01178	2.48297	2.60075
762.543	H77 C44 N1 O7 P1	-0.91ppm	PCO 36:7	7.53008e+06	2.2182e+06	2.68854e+06	1.9394e+06	2.37087e+06	2.17597e+06	2.31936e+06	2.45895e+06	2.99889e+06	2.24263e+06	2.05077e+06	1.8012e+06	3325116	3.71422e+06	2.46952e+06	2.67105e+06	1579096	4.01323e+06	5.565e+06	2.85606e+06	2723369	3.65972e+06	1.49562e+06	3143453	6.46576e+06	2.81619e+06	1.83373e+06	2.85924e+06	4.22611e+06	6.03933e+06	3.12304e+06	PCO 36:7	2.98952	4.27226	2.30874	3.74666	3.39508	3.63571	3.08371	3.40512	2.96697	2.95285	2.79959	4.56235	3.37917	2.93135
804.684	H95 C46 N1 O7 P1	-0.61ppm	PCO 38:0	0	211569	200861	202962	190544	166872	143576	211688	216558	217333	131998	135940	250615	211317	240621	281110	118834	297349	148848	415070	344132	190572	86062.3	239321	212656	302880	294939	259986	79720.5	156903	161115	PCO 38:0	0.285137	0.319181	0.241614	0.301114	0.260365	0.225061	0.265473	0.245893	0.287528	0.190061	0.211289	0.343865	0.192254	0.28562
802.668	H93 C46 N1 O7 P1	-0.50ppm	PCO 38:1	0	760817	615714	601620	518434	569565	539618	754341	558973	764185	582645	557774	537483	635996	682718	776523	383669	623828	439045	875800	799061	569660	377169	606737	454336	699855	659000	581162	285139	493008	472433	PCO 38:1	1.02537	0.978411	0.716193	0.819274	0.888672	0.845878	0.946002	0.634692	1.011	0.838934	0.866942	0.737474	0.578624	0.810394
800.652	H91 C46 N1 O7 P1	-1.15ppm	PCO 38:2	0	599293	520208	405016	395449	431999	376844	470660	415827	501998	436419	382930	384790	429987	518390	474642	336055	522932	293878	684174	567252	404149	330666	591949	341972	545596	426974	430034	284684	406557	367881	PCO 38:2	0.807682	0.826644	0.482147	0.624922	0.674033	0.590722	0.590244	0.472155	0.664135	0.628388	0.595184	0.527965	0.391199	0.615335
798.636	H89 C46 N1 O7 P1	-0.97ppm	PCO 38:3	0	941111	767263	790696	497128	751034	772932	919595	725548	883022	579393	543537	677364	800299	760193	813830	474086	879894	538768	1.10664e+06	970130	733331	466504	677448	558376	889658	818508	714070	368578	685137	654938	PCO 38:3	1.26836	1.21923	0.941276	0.785604	1.17181	1.21161	1.15324	0.823831	1.16822	0.834253	0.844813	0.929403	0.728106	0.902358
796.621	H87 C46 N1 O7 P1	-1.08ppm	PCO 38:4	180230	7.25502e+06	6.15514e+06	5.67391e+06	4.07242e+06	4.74944e+06	6.15609e+06	7.12442e+06	5.40605e+06	6.72317e+06	3.97045e+06	4.06929e+06	6487466	5.17253e+06	5.3979e+06	5871382	2.63542e+06	5.70774e+06	4.1123e+06	7.21972e+06	6.38047e+06	4.78346e+06	2553594	5.06354e+06	4.48887e+06	5.86417e+06	5.26858e+06	4.56781e+06	2.14534e+06	4.31579e+06	4.659e+06	PCO 38:4	9.77777	9.78093	6.75445	6.43558	7.41038	9.64996	8.93457	6.13835	8.89465	5.71694	6.32485	8.90137	4.70593	6.40737
794.605	H85 C46 N1 O7 P1	-1.65ppm	PCO 38:5	0	1.64283e+07	1.29682e+07	1.09374e+07	7.58559e+06	9291269	1.42484e+07	1.54298e+07	1.02843e+07	1.36716e+07	8.209e+06	7809866	1.50072e+07	1.14338e+07	1.14032e+07	1.18124e+07	5.83952e+06	1.08993e+07	9.34914e+06	1.71283e+07	1.29759e+07	9.16476e+06	5.38322e+06	1.01218e+07	8.38981e+06	1.40725e+07	1.1481e+07	8.80012e+06	4.02613e+06	7.32923e+06	1.15757e+07	PCO 38:5	22.1408	20.6073	13.0203	11.9874	14.4968	22.3351	19.3502	11.6774	18.0873	11.8199	12.1388	20.5912	10.4024	13.5358
792.59	H83 C46 N1 O7 P1	-0.45ppm	PCO 38:6	0	1.18106e+07	8996569	7.94164e+06	5.65089e+06	7027540	1.19871e+07	1.1243e+07	7.88593e+06	9.4196e+06	6.20078e+06	5.70187e+06	1.25726e+07	9.23885e+06	9.27334e+06	9.01828e+06	4.33882e+06	8.1422e+06	8.73931e+06	1.33965e+07	1.0402e+07	7.29225e+06	4.00523e+06	7.59853e+06	9.71462e+06	1.05655e+07	8.68818e+06	7.09329e+06	3.31668e+06	5.89321e+06	1.00114e+07	PCO 38:6	15.9174	14.2961	9.45404	8.93002	10.9648	18.7903	14.0996	8.95416	12.462	8.92834	8.86235	17.2508	8.40544	11.0076
790.573	H81 C46 N1 O7 P1	-1.77ppm	PCO 38:7	11730758	4.89936e+06	4.12293e+06	3.30032e+06	3.79061e+06	3.17051e+06	5.05703e+06	5083808	4.00385e+06	3.73147e+06	2.96909e+06	2486996	6.45123e+06	5609272	4.28314e+06	4166558	2.08591e+06	5135692	6.43445e+06	5.67868e+06	4519498	5.49528e+06	1.87455e+06	4.07115e+06	8.03709e+06	5.5459e+06	3.43838e+06	4.05626e+06	5.77495e+06	7.75056e+06	5.71606e+06	PCO 38:7	6.60298	6.55161	3.92883	5.99025	4.94683	7.92714	6.37549	4.54621	4.93667	4.27511	3.86551	8.85166	5.10327	5.08414
788.558	H79 C46 N1 O7 P1	-1.23ppm	PCO 38:8	42165.2	139422	166092	54633.4	263467	391233	231530	121525	190173	228952	122402	169350	344726	347249	269954	427667	0	215722	276538	414541	103259	352078	114656	229501	352484	278581	89809.6	132271	196370	394449	333189	PCO 38:8	0.187902	0.263931	0.0650378	0.416354	0.610427	0.362934	0.152402	0.215934	0.302901	0.176244	0.263219	0.472994	0.315924	0.320439
832.715	H99 C48 N1 O7 P1	-0.45ppm	PCO 40:0	0	273758	204649	226014	170084	127478	142106	298738	196127	304487	232964	194542	213198	192437	270404	349842	193989	176423	142026	392277	302721	245100	138296	197503	143129	312485	299358	295223	28209.3	81042.2	210039	PCO 40:0	0.36895	0.3252	0.269056	0.268781	0.198899	0.222757	0.37464	0.222695	0.402831	0.335438	0.302375	0.292527	0.175078	0.320973
830.699	H97 C48 N1 O7 P1	-1.02ppm	PCO 40:1	0	780831	755656	714266	627432	709196	558178	863342	652004	887430	567122	598117	629185	857770	862463	988413	558797	813937	558784	1372387	1064544	862612	475347	724727	644182	1.01907e+06	878189	745845	465871	565264	642845	PCO 40:1	1.05234	1.20079	0.850291	0.991522	1.10653	0.87497	1.0827	0.740325	1.17406	0.816583	0.929646	0.863297	0.780392	1.02375
828.683	H95 C48 N1 O7 P1	-0.69ppm	PCO 40:2	0	353005	364794	248750	207325	292332	177545	302690	170198	391962	280127	251360	220692	275668	337930	441891	208080	372314	141321	496293	439865	240328	169965	367862	261885	405993	356278	344835	152213	226309	192941	PCO 40:2	0.475753	0.579683	0.296122	0.327634	0.456115	0.27831	0.379596	0.193253	0.51856	0.403348	0.390686	0.302809	0.250801	0.401127
826.668	H93 C48 N1 O7 P1	-0.56ppm	PCO 40:3	0	284233	191246	266470	201720	258740	231836	353409	240547	314846	137558	110263	231085	283386	280332	302609	123546	354050	179717	505481	360656	293382	210304	312330	224701	376217	305478	192860	125056	187341	178704	PCO 40:3	0.383068	0.303903	0.317216	0.318775	0.403702	0.363414	0.443202	0.273132	0.416537	0.198065	0.171381	0.317069	0.257823	0.332758
824.652	H91 C48 N1 O7 P1	-0.85ppm	PCO 40:4	0	1.69434e+06	1.33913e+06	1.38277e+06	975488	1.20769e+06	1.22365e+06	1.53824e+06	1.12668e+06	1.41305e+06	1.05078e+06	930657	1.14059e+06	1.29458e+06	1468694	1.39391e+06	678791	1.41429e+06	810750	1.81207e+06	1.5102e+06	1.13083e+06	773789	1.27537e+06	878090	1.64391e+06	1.33262e+06	1.2722e+06	595465	1.06015e+06	898202	PCO 40:4	2.28351	2.12796	1.64611	1.54155	1.88431	1.91812	1.92907	1.2793	1.86944	1.51299	1.44651	1.56498	1.1778	1.74336
822.636	H89 C48 N1 O7 P1	-0.82ppm	PCO 40:5	0	3.62844e+06	2.8237e+06	2.59564e+06	2.07399e+06	2.37906e+06	2.86678e+06	3.45731e+06	2.55605e+06	3.06687e+06	2.17517e+06	2.09521e+06	2.6822e+06	2.79559e+06	3025674	3.13102e+06	1.55829e+06	3.10272e+06	2.06501e+06	3.95818e+06	3.2767e+06	2.41737e+06	1.53475e+06	2847148	2.2116e+06	3.2036e+06	2976305	2.34439e+06	1.16198e+06	2.28048e+06	2.39504e+06	PCO 40:5	4.89014	4.48705	3.08995	3.2775	3.71197	4.49382	4.33573	2.9023	4.05742	3.13196	3.25656	3.68021	2.5434	3.59151
820.621	H87 C48 N1 O7 P1	-0.89ppm	PCO 40:6	0	5.22642e+06	3.99129e+06	3.43942e+06	3.07461e+06	3.6148e+06	4.35276e+06	4.7498e+06	3.44437e+06	4.35484e+06	3.12649e+06	2.93332e+06	4.42059e+06	4.29568e+06	4.28442e+06	4.46653e+06	2.45544e+06	4.45204e+06	3.44218e+06	6.49091e+06	4.93522e+06	3460638	2.26521e+06	4.02801e+06	3.74096e+06	5.22417e+06	4.13296e+06	3.41167e+06	1.8216e+06	3312213	3.773e+06	PCO 40:6	7.04377	6.34242	4.09442	4.85876	5.64004	6.82316	5.95661	3.91094	5.76138	4.50174	4.55923	6.06543	3.90817	5.08567
818.605	H85 C48 N1 O7 P1	-1.20ppm	PCO 40:7	412851	4.82489e+06	3.27478e+06	2.69207e+06	2.32509e+06	2.91019e+06	3.89631e+06	4.43174e+06	2.89317e+06	3.15666e+06	2.56628e+06	2488728	4.09777e+06	4283567	3.47741e+06	3.41321e+06	2.09243e+06	3.57798e+06	3.90597e+06	5.71878e+06	3.82927e+06	2.75456e+06	1.89339e+06	3.1865e+06	3.56126e+06	4.72474e+06	3.39752e+06	2.68496e+06	1.81558e+06	2.78963e+06	3.67964e+06	PCO 40:7	6.50262	5.20384	3.20474	3.6743	4.54066	6.10765	5.55775	3.28508	4.17621	3.69511	3.8682	5.6225	3.89716	4.12773
814.573	H81 C48 N1 O7 P1	-2.01ppm	PCO 40:9	349784	144991	248256	236924	354972	166373	285010	349421	361883	47031.9	179265	122998	308637	266522	356358	315081	196740	377306	405180	226507	240502	301828	93300.4	360538	418337	379652	150834	291150	300738	563594	370627	PCO 40:9	0.195407	0.394496	0.282044	0.560958	0.259586	0.446767	0.438201	0.410903	0.0622225	0.258119	0.191175	0.423477	0.24248	0.423001
858.731	H101 C50 N1 O7 P1	-0.51ppm	PCO 42:1	0	297577	210781	193224	317184	222099	103953	304658	210337	299083	120620	93808.5	198222	275411	248603	287612	175605	270648	96109.5	497080	368056	169124	168556	226141	176252	353967	218167	145191	51857.8	97477.9	118586	PCO 42:1	0.401051	0.334945	0.230022	0.501241	0.346533	0.162951	0.382065	0.238829	0.395682	0.173677	0.145805	0.271978	0.250567	0.295094
856.715	H99 C50 N1 O7 P1	-0.80ppm	PCO 42:2	0	303734	208622	178736	122987	262735	251928	283897	194904	293721	194469	202144	190148	303112	332931	452737	106117	388716	255826	509325	368848	223919	246611	431308	178155	415780	355745	234707	168238	260011	255129	PCO 42:2	0.40935	0.331515	0.212774	0.194354	0.409935	0.394909	0.356029	0.221306	0.388589	0.280011	0.31419	0.260899	0.275769	0.395193
854.699	H97 C50 N1 O7 P1	-0.35ppm	PCO 42:3	0	60216.3	54348.8	99965.7	75656.6	68048.3	55003.6	140505	86215.7	82601	58702.7	73058.6	91864.5	61372	109111	194390	116936	147082	98327.4	326641	198869	71747.4	42067.4	110868	53209.9	194220	154160	158639	56808.9	105741	59237.5	PCO 42:3	0.0811549	0.0863638	0.119003	0.119559	0.106173	0.0862208	0.176204	0.0978945	0.10928	0.0845244	0.113554	0.126046	0.0558358	0.129516
852.684	H95 C50 N1 O7 P1	-0.53ppm	PCO 42:4	0	456461	422929	367197	268382	288538	363849	491247	327260	397647	328267	228308	339967	467925	435128	456169	179902	424450	293458	731502	516346	304210	249252	432616	266737	479554	416132	352649	159150	302092	305627	PCO 42:4	0.615184	0.672063	0.437127	0.42412	0.450196	0.57035	0.616061	0.37159	0.526081	0.472663	0.354857	0.466465	0.425715	0.516502
850.668	H93 C50 N1 O7 P1	-0.97ppm	PCO 42:5	0	516420	318183	371328	212202	457465	396900	553474	220683	428761	400960	230328	255949	373932	437117	447215	255126	450357	116747	646820	472037	30797	254818	366926	0	436400	388330	238961	50130	88373.2	266287	PCO 42:5	0.695992	0.505613	0.442044	0.335339	0.713766	0.62216	0.694099	0.250576	0.567244	0.577332	0.357997	0.351185	0.3402	0.518863
848.653	H91 C50 N1 O7 P1	-0.32ppm	PCO 42:6	0	423602	376277	250603	213208	311418	235243	451924	274078	378754	237833	179856	176969	477971	263978	276056	125353	190901	194851	818057	525783	87756.5	226236	416413	284217	597743	471334	333380	98784.3	230427	316978	PCO 42:6	0.570899	0.59793	0.298328	0.33693	0.485894	0.368754	0.566748	0.311205	0.501086	0.34245	0.279548	0.242817	0.434854	0.313345
846.636	H89 C50 N1 O7 P1	-1.26ppm	PCO 42:7	0	348501	138736	120208	235822	181588	222962	340490	99016.8	126892	209641	142160	144117	183477	246839	281903	99059.9	159034	108481	475022	300677	72449.6	59563.3	153369	108322	248679	253007	164665	21516.5	57563.9	119669	PCO 42:7	0.469684	0.220461	0.1431	0.372666	0.283324	0.349503	0.427	0.11243	0.167877	0.301857	0.220958	0.197741	0.166926	0.293001
[truncated: 16 more columns]

## Sheet: PE and PEOx
precursorexpmz$A	sumcomposition	precursorppmdev$A	name	intensity:Exp_Sebastian_10_00.mzML	intensity:Exp_Sebastian_10_01.mzML	intensity:Exp_Sebastian_10_02.mzML	intensity:Exp_Sebastian_10_03.mzML	intensity:Exp_Sebastian_10_04.mzML	intensity:Exp_Sebastian_10_05.mzML	intensity:Exp_Sebastian_10_06.mzML	intensity:Exp_Sebastian_10_07.mzML	intensity:Exp_Sebastian_10_08.mzML	intensity:Exp_Sebastian_10_09.mzML	intensity:Exp_Sebastian_10_10.mzML	intensity:Exp_Sebastian_10_11.mzML	intensity:Exp_Sebastian_10_12.mzML	intensity:Exp_Sebastian_10_13.mzML	intensity:Exp_Sebastian_10_14.mzML	intensity:Exp_Sebastian_10_15.mzML	intensity:Exp_Sebastian_10_16.mzML	intensity:Exp_Sebastian_10_17.mzML	intensity:Exp_Sebastian_10_18.mzML	intensity:Exp_Sebastian_10_19.mzML	intensity:Exp_Sebastian_10_20.mzML	intensity:Exp_Sebastian_10_21.mzML	intensity:Exp_Sebastian_10_22.mzML	intensity:Exp_Sebastian_10_23.mzML	intensity:Exp_Sebastian_10_24.mzML	intensity:Exp_Sebastian_10_25.mzML	intensity:Exp_Sebastian_10_26.mzML	intensity:Exp_Sebastian_10_27.mzML	intensity:Exp_Sebastian_10_28.mzML	intensity:Exp_Sebastian_10_29.mzML	intensity:Exp_Sebastian_10_30.mzML	name	intensity:Exp_Sebastian_10_01.mzML	intensity:Exp_Sebastian_10_02.mzML	intensity:Exp_Sebastian_10_03.mzML	intensity:Exp_Sebastian_10_04.mzML	intensity:Exp_Sebastian_10_05.mzML	intensity:Exp_Sebastian_10_06.mzML	intensity:Exp_Sebastian_10_07.mzML	intensity:Exp_Sebastian_10_08.mzML	intensity:Exp_Sebastian_10_09.mzML	intensity:Exp_Sebastian_10_10.mzML	intensity:Exp_Sebastian_10_11.mzML	intensity:Exp_Sebastian_10_12.mzML	intensity:Exp_Sebastian_10_13.mzML	intensity:Exp_Sebastian_10_14.mzML
					Ctrl.	Fento 1 µM	Fento 2 µM	Fento 1 µM + Toc	Fento 1 µM + Def	Fento 1 µM + Lip-1	Ctrl.	Fento 1 µM	Fento 2 µM	Fento 1 µM + Toc	Fento 1 µM + Def	Fento 1 µM + Lip-1	Ctrl.	Fento 1 µM	Fento 2 µM	Fento 1 µM + Toc	Fento 1 µM + Def	Fento 1 µM + Lip-1	Ctrl.	Fento 1 µM	Fento 2 µM	Fento 1 µM + Toc	Fento 1 µM + Def	Fento 1 µM + Lip-1	Ctrl.	Fento 1 µM	Fento 2 µM	Fento 1 µM + Toc	Fento 1 µM + Def	Fento 1 µM + Lip-1
###	Phosphatidylethanolamine			0	1	2	3	4	5	6	7	8	9	10	11	12	13	14	15	16	17	18	19	20	21	22	23	24	25	26	27	28	29	30		Normalisation
720.554	H79 C39 N1 O8 P1	-0.03ppm	PE 34:0	2.83476e+07	2.82421e+07	2.37604e+07	2.60351e+07	23785015	2.53782e+07	1.91745e+07	2.85833e+07	2.57699e+07	2.68729e+07	2.64206e+07	2.51072e+07	2.20856e+07	3.23518e+07	2.7293e+07	2.87053e+07	1.95415e+07	29019914	20675305	2.99448e+07	2.8292e+07	2.42827e+07	2.17107e+07	2.74861e+07	2.32188e+07	2.70473e+07	25903608	2.38322e+07	2.17742e+07	2.05478e+07	2.45449e+07		1	2	3	4	5	6	7	8	9	10	11	12	13	14
692.523	H75 C37 N1 O8 P1	0.02ppm	PE 32:0	94349.7	3.94401e+06	3.30005e+06	3.2347e+06	3.61633e+06	3.90212e+06	2.43855e+06	3.62722e+06	2.78114e+06	3.57239e+06	3.82826e+06	3599609	2.6098e+06	3.08806e+06	3.04689e+06	3.5237e+06	3.01596e+06	2.92526e+06	2.00364e+06	4255569	3.51631e+06	2.64571e+06	2.80119e+06	2.70734e+06	2.14738e+06	3.35174e+06	3.04633e+06	2756327	2.42172e+06	2.26706e+06	2.25451e+06	PE 32:0	6.98251	6.94443	6.21218	7.60211	7.68794	6.35883	6.34499	5.39611	6.64684	7.24483	7.16848	5.90836	4.77261	5.58181
690.507	H73 C37 N1 O8 P1	-0.23ppm	PE 32:1	0	2.91024e+06	2.30948e+06	2.32187e+06	2.3969e+06	2.6449e+06	1.95346e+06	2.6116e+06	2.0599e+06	2.51769e+06	2.57305e+06	2.73931e+06	2.25217e+06	1.89688e+06	1752425	1.96855e+06	1.74045e+06	1.76208e+06	1.39649e+06	2443562	2.07664e+06	1.52903e+06	1.64708e+06	1.70981e+06	1.49124e+06	2.03605e+06	1.65964e+06	1.5905e+06	1.53498e+06	1.30484e+06	1.46916e+06	PE 32:1	5.15231	4.85994	4.45911	5.03867	5.21097	5.09391	4.56841	3.99671	4.68445	4.86939	5.45522	5.09872	2.93164	3.21039
718.538	H77 C39 N1 O8 P1	0.08ppm	PE 34:1	0	2.7733e+07	2.24979e+07	2.1803e+07	2.23391e+07	2.40478e+07	1.82687e+07	2.59879e+07	2.01559e+07	2.49711e+07	2.44834e+07	2.4427e+07	1.98212e+07	2.13642e+07	1.96475e+07	2.21216e+07	1.79391e+07	1.9803e+07	1.47349e+07	28041596	2.19361e+07	1.7304e+07	1.68937e+07	1.91419e+07	1.63373e+07	2.18308e+07	19320220	1.7761e+07	1.51911e+07	1.45834e+07	1.60431e+07	PE 34:1	49.0986	47.3432	41.8722	46.9605	47.3788	47.6381	45.46	39.1075	46.4616	46.3339	48.6455	44.8736	33.0185	35.9936
746.569	H81 C41 N1 O8 P1	0.12ppm	PE 36:1	0	6.988e+07	5.71947e+07	5.4503e+07	5.01914e+07	5.55715e+07	4.42806e+07	6.44088e+07	5.09309e+07	6.32546e+07	5.40061e+07	5.1234e+07	4.78079e+07	5.91704e+07	5.7287e+07	6.27024e+07	4.34318e+07	5.6057e+07	4.02951e+07	7.95751e+07	6.43978e+07	5.06345e+07	4.17679e+07	5.27007e+07	4.44047e+07	6.42833e+07	53879200	4.96579e+07	3.69919e+07	4.13885e+07	4.39694e+07	PE 36:1	123.716	120.357	104.672	105.511	109.487	115.467	112.669	98.8186	117.692	102.204	102.031	108.233	91.4483	104.948
774.6	H85 C43 N1 O8 P1	-0.86ppm	PE 38:1	0	2.77118e+07	2.17242e+07	2.02746e+07	1.46974e+07	1.70927e+07	1.52547e+07	2.53937e+07	1.85942e+07	2.3646e+07	1.60134e+07	1.4378e+07	1.57017e+07	2.45271e+07	2.30106e+07	2.46183e+07	1.3395e+07	2.12056e+07	1.4323e+07	3.3738e+07	2.61381e+07	19656834	1.25854e+07	2.03757e+07	1.5765e+07	2.78657e+07	2.23269e+07	1.96549e+07	1.05454e+07	1.57151e+07	1.56387e+07	PE 38:1	49.0612	45.7151	38.937	30.8963	33.676	39.7787	44.4205	36.0774	43.996	30.3047	28.6332	35.5474	37.9068	42.1547
802.631	H89 C45 N1 O8 P1	-0.71ppm	PE 40:1	0	2.95642e+06	2.1218e+06	1.99878e+06	1.59137e+06	2.01772e+06	1.47603e+06	2.6616e+06	1.89226e+06	2.31583e+06	1.77136e+06	1.63794e+06	1.58918e+06	2.5945e+06	2.32912e+06	2.42985e+06	1378110	2070620	1.45076e+06	3.58054e+06	2.67451e+06	2.0068e+06	1.40531e+06	2064716	1.54861e+06	2.8799e+06	2.15958e+06	1.98861e+06	1.18993e+06	1.52871e+06	1.45776e+06	PE 40:1	5.23407	4.465	3.83862	3.34533	3.97531	3.84894	4.65587	3.67145	4.30886	3.35223	3.26189	3.59778	4.00982	4.26689
830.663	H93 C47 N1 O8 P1	-0.52ppm	PE 42:1	0	911495	698276	698793	552921	510815	522873	832680	703321	748725	542626	578920	495832	712487	663038	743393	373963	600515	390070	1.00031e+06	788217	523038	466153	543377	534039	793556	561881	586336	350735	343940	430026	PE 42:1	1.61372	1.46941	1.34202	1.16233	1.00641	1.36346	1.45659	1.36462	1.39309	1.0269	1.1529	1.12252	1.10115	1.21467
688.491	H71 C37 N1 O8 P1	0.42ppm	PE 32:2	0	216811	242094	197580	228590	262720	99338	218414	188338	219457	251442	179779	235698	106048	130916	149932	154475	118941	88260.3	235660	90897.2	88266.3	101714	152591	93060.1	124748	98907.8	125422	146823	91157.5	71257.9	PE 32:2	0.383844	0.509449	0.379449	0.480533	0.517611	0.259037	0.382065	0.365422	0.408325	0.475844	0.358022	0.533602	0.163897	0.239834
716.523	H75 C39 N1 O8 P1	0.23ppm	PE 34:2	0	5.50244e+06	4.68452e+06	4.62503e+06	4.24359e+06	4627001	3.404e+06	5.27588e+06	4.30931e+06	5.26176e+06	4.67375e+06	4.63714e+06	3.66063e+06	4.05443e+06	3.89233e+06	4.26342e+06	3.26582e+06	3.94189e+06	2.53496e+06	5.373e+06	4255631	3.45654e+06	3.20503e+06	3.95252e+06	2.84392e+06	4.27713e+06	3.69217e+06	3.43537e+06	2.84924e+06	3.13667e+06	2.84684e+06	PE 34:2	9.74156	9.85783	8.88228	8.92072	9.1161	8.87638	9.22896	8.36112	9.7901	8.84488	9.23468	8.28736	6.26616	7.13064
744.554	H79 C41 N1 O8 P1	0.13ppm	PE 36:2	0	3.37441e+07	2.78857e+07	26744397	24600742	26762981	2.04259e+07	3.1248e+07	2.48747e+07	3.09922e+07	2.72517e+07	26956887	2.21972e+07	2.767e+07	2.58082e+07	2.86378e+07	2.15981e+07	2.62472e+07	1.79859e+07	3.60237e+07	29315702	2.24908e+07	2.10912e+07	2.47191e+07	1.95411e+07	28132388	24062569	2.26596e+07	18756290	1.91696e+07	1.96807e+07	PE 36:2	59.7408	58.681	51.3621	51.7148	52.7283	53.2632	54.6612	48.2631	57.6646	51.5727	53.6836	50.2526	42.7642	47.2798
772.584	H83 C43 N1 O8 P1	-0.94ppm	PE 38:2	0	2.50666e+07	2.10736e+07	1.97273e+07	1.59228e+07	1.89013e+07	1.57917e+07	2.34366e+07	17884519	2.29102e+07	17073543	1.66686e+07	1.67998e+07	2.13764e+07	2.14819e+07	2.36068e+07	1.43679e+07	2.03249e+07	1.40269e+07	2.98173e+07	2.46251e+07	1.90792e+07	1.30716e+07	1.85194e+07	1.59073e+07	2.399e+07	2.10464e+07	1.87377e+07	1.12976e+07	1.4805e+07	1.64636e+07	PE 38:2	44.3781	44.3462	37.8858	33.4723	37.2393	41.1788	40.9971	34.7004	42.627	32.311	33.1949	38.0335	33.0374	39.3542
800.616	H87 C45 N1 O8 P1	-0.89ppm	PE 40:2	0	6.97246e+06	5.62965e+06	5.38957e+06	4.24953e+06	5.07708e+06	4410141	6.69275e+06	4.88911e+06	6.10542e+06	4.54074e+06	4.39476e+06	4.35551e+06	6.14188e+06	6.00677e+06	6.54297e+06	3.90777e+06	6.02294e+06	3795107	8.73678e+06	7.05798e+06	5.3907e+06	3.57614e+06	5.41303e+06	4.173e+06	6.94624e+06	6.07684e+06	5.02407e+06	2.93368e+06	4.1512e+06	4307580	PE 40:2	12.3441	11.8467	10.3506	8.93321	10.0028	11.5	11.7074	9.48608	11.3598	8.59317	8.75198	9.86053	9.49233	11.0042
828.647	H91 C47 N1 O8 P1	-0.71ppm	PE 42:2	0	1.11973e+06	873132	852130	689727	803432	669280	974425	772751	851877	694505	645163	628472	793295	879444	930991	573549	785350	499211	1.21383e+06	890231	777219	575860	777666	618225	1.06427e+06	780906	721729	422064	602679	575641	PE 42:2	1.98239	1.83737	1.6365	1.44992	1.58292	1.74523	1.70454	1.49933	1.58501	1.31432	1.28482	1.42281	1.22604	1.61111
736.491	H71 C41 N1 O8 P1	-0.51ppm	PE 36:6	0	0	0	0	0	36154.5	0	0	0	0	29545.1	60669.3	0	0	0	35035.5	67590.4	0	0	0	48658.8	0	44107.3	0	15422	0	0	34905.4	0	22200.6	20784.9	PE 36:6	0	0	0	0	0.0712315	0	0	0	0	0.0559129	0.120821	0	0	0
738.506	H73 C41 N1 O8 P1	-0.76ppm	PE 36:5	152777	572573	727575	626263	598800	557879	316028	592026	657043	756936	634998	639428	338732	567141	531832	580356	397951	609809	326794	609213	623739	570506	430613	636716	365418	628074	496912	612202	428138	580899	281919	PE 36:5	1.01369	1.53107	1.20273	1.25877	1.09913	0.824084	1.03562	1.27483	1.40837	1.20171	1.2734	0.766862	0.876522	0.974301
770.569	H81 C43 N1 O8 P1	-0.96ppm	PE 38:3	0	8.5243e+06	6.90069e+06	6.61325e+06	6.55826e+06	7.3513e+06	5.52971e+06	7.82031e+06	6.37821e+06	7873239	7.01693e+06	7000778	6.1826e+06	7.52965e+06	7.17817e+06	7.85337e+06	5955384	6.65906e+06	5.28312e+06	9.72852e+06	8.10153e+06	6.46954e+06	5.5788e+06	6.3566e+06	5.95048e+06	7.82573e+06	6.81008e+06	6.66127e+06	4.99362e+06	5.27552e+06	5.71931e+06	PE 38:3	15.0915	14.5214	12.7006	13.7865	14.4835	14.4195	13.6799	12.3753	14.649	13.2793	13.9418	13.9969	11.6371	13.1502
768.553	H79 C43 N1 O8 P1	-1.09ppm	PE 38:4	0	3.46525e+07	2.93818e+07	2.73243e+07	2.64903e+07	2.74145e+07	2.08117e+07	3.26126e+07	2.68861e+07	3.14997e+07	2.9359e+07	2.98317e+07	2.38261e+07	2.92301e+07	2.70288e+07	2.8519e+07	2.17958e+07	25322497	1.83042e+07	3.61914e+07	2.88687e+07	2.19882e+07	2.12039e+07	2.47563e+07	2.01756e+07	2.88299e+07	2.42441e+07	2.22897e+07	1.95063e+07	1.94455e+07	1.91329e+07	PE 38:4	61.349	61.8293	52.4757	55.6869	54.0119	54.2692	57.0484	52.1657	58.6087	55.5607	59.4086	53.9403	45.1753	49.516
766.538	H77 C43 N1 O8 P1	-0.87ppm	PE 38:5	0	1.26862e+07	1.10285e+07	1.08583e+07	1.03738e+07	1.10937e+07	5.68535e+06	1.23699e+07	1.06963e+07	1.20119e+07	1.08747e+07	1.06116e+07	6.38906e+06	1.04567e+07	9.33375e+06	9.73591e+06	8.21888e+06	9.31894e+06	5.29486e+06	1.38719e+07	1.09937e+07	7.75903e+06	8.8022e+06	9.75976e+06	6.11776e+06	1.0729e+07	9.52353e+06	7.93805e+06	7.7038e+06	7.47718e+06	5502113	PE 38:5	22.4598	23.2078	20.8531	21.8075	21.8568	14.8253	21.6384	20.7536	22.3495	20.58	21.1326	14.4643	16.1609	17.0992
764.522	H75 C43 N1 O8 P1	-0.85ppm	PE 38:6	0	3.93352e+06	3.38856e+06	3.27929e+06	4.97931e+06	5.16869e+06	2.79214e+06	3.90867e+06	3.11753e+06	3.63783e+06	5.06021e+06	5.24213e+06	2.84125e+06	3.26528e+06	2.96304e+06	3.16385e+06	3956601	2.64582e+06	2.4099e+06	4138014	3225943	2.49584e+06	3.80243e+06	2.5549e+06	2.73413e+06	3.31969e+06	2.71919e+06	2.45882e+06	3.53632e+06	2.13026e+06	2.74532e+06	PE 38:6	6.96393	7.1307	6.29782	10.4673	10.1833	7.28088	6.83734	6.04878	6.76858	9.57625	10.4395	6.43236	5.04652	5.4282
762.506	H73 C43 N1 O8 P1	-0.93ppm	PE 38:7	0	223266	190289	198362	389007	322724	162202	293240	207662	250089	437223	481005	178111	238218	219896	310157	226656	174414	121057	232795	165556	232649	279611	149380	169196	180552	130021	215124	256374	331172	125921	PE 38:7	0.395271	0.400433	0.380951	0.817756	0.63583	0.422962	0.512956	0.402916	0.465319	0.827426	0.957903	0.40323	0.368168	0.402844
740.522	H75 C41 N1 O8 P1	-0.31ppm	PE 36:4	0	4.95385e+06	4.35569e+06	4.22163e+06	4.25873e+06	4.54747e+06	2.66566e+06	4.64046e+06	3.92909e+06	4.86895e+06	4.64703e+06	4.92537e+06	2.84049e+06	3.77306e+06	3.67617e+06	3987888	3.33171e+06	3.04589e+06	2.03172e+06	4.61601e+06	3.81251e+06	3.05068e+06	3.0605e+06	3.20419e+06	2.32343e+06	3.71635e+06	3370590	3148684	2.81835e+06	2.78462e+06	2.31927e+06	PE 36:4	8.77034	9.16586	8.10756	8.95255	8.95942	6.95107	8.11743	7.62342	9.05923	8.79432	9.80868	6.43064	5.8313	6.73463
798.6	H85 C45 N1 O8 P1	-0.89ppm	PE 40:3	0	5.55036e+06	4.30672e+06	4.09479e+06	3.30328e+06	3.58839e+06	3.27496e+06	4916641	3896803	4.73527e+06	3.35327e+06	3253947	3.09058e+06	4.54934e+06	4.46039e+06	4.75179e+06	3.05981e+06	4.34453e+06	2.6612e+06	6.2113e+06	5188379	3.90901e+06	2.63698e+06	3.84568e+06	2.95132e+06	5.04452e+06	4.29758e+06	3.78857e+06	2.37496e+06	2.96608e+06	3.06844e+06	PE 40:3	9.82641	9.0628	7.86397	6.94403	7.06984	8.53988	8.60055	7.56077	8.81051	6.34592	6.48011	6.99682	7.03105	8.17131
796.584	H83 C45 N1 O8 P1	-1.07ppm	PE 40:4	0	1.41282e+07	1.17774e+07	10595670	1.05016e+07	1.12058e+07	8.19803e+06	13661263	9.772e+06	1.19905e+07	1.16494e+07	1.13685e+07	9.41556e+06	1.12474e+07	1.00408e+07	1.07529e+07	7933767	9584301	7.63559e+06	1.42996e+07	10996686	8.1959e+06	8.00304e+06	9.0265e+06	8.08807e+06	1.16907e+07	9.30163e+06	8.36107e+06	7.12524e+06	7.25711e+06	7943577	PE 40:4	25.0126	24.7837	20.3488	22.0761	22.0776	21.3774	23.8973	18.9601	22.3096	22.046	22.64	21.316	17.3829	18.3945
794.569	H81 C45 N1 O8 P1	-1.06ppm	PE 40:5	84113.1	1.9797e+07	15781864	1.44967e+07	1.60713e+07	17221307	1.15536e+07	1.82317e+07	1.40869e+07	1.6151e+07	17480257	17390312	1.28558e+07	1.70259e+07	1.44687e+07	1.48833e+07	1.34004e+07	1.45982e+07	1.10321e+07	2.03332e+07	1.54772e+07	1.16791e+07	1.33899e+07	1.36792e+07	1.19121e+07	1.71143e+07	1.28904e+07	1.16836e+07	1.20985e+07	1.05677e+07	1.19239e+07	PE 40:5	35.0487	33.2104	27.8406	33.7846	33.9294	30.1274	31.8922	27.3321	30.0508	33.0807	34.6321	29.1046	26.3136	26.5061
792.553	H79 C45 N1 O8 P1	-1.03ppm	PE 40:6	53252.8	1.76314e+07	1.39219e+07	1.30472e+07	1.62814e+07	1.79665e+07	1.10063e+07	1.70741e+07	1.28171e+07	1.49701e+07	1.80799e+07	1.83189e+07	1.19742e+07	1.58145e+07	1.41963e+07	1.37315e+07	1.50574e+07	1.30871e+07	1.08507e+07	2.00107e+07	1.50569e+07	1.14484e+07	1.61771e+07	13192403	1.17199e+07	1.59578e+07	12648328	1.10303e+07	13746167	9.81675e+06	1.15181e+07	PE 40:6	31.2148	29.2964	25.057	34.2262	35.3975	28.7004	29.8673	24.8684	27.8535	34.2154	36.4813	27.1086	24.4415	26.0072
790.537	H77 C45 N1 O8 P1	-1.06ppm	PE 40:7	24611.6	6.17541e+06	5.11709e+06	4.47922e+06	7.19801e+06	7.74741e+06	4021316	5.70731e+06	4.76828e+06	5.11373e+06	7.89309e+06	8.41742e+06	4.50418e+06	5326929	4.8074e+06	5.13416e+06	6.3398e+06	4.58342e+06	3.78785e+06	6817684	4.79635e+06	3.59383e+06	6.43631e+06	4.39286e+06	4.05958e+06	5.56669e+06	4087612	3.87056e+06	5.8245e+06	3.72086e+06	4.268e+06	PE 40:7	10.933	10.7681	8.60226	15.1314	15.2639	10.4861	9.98365	9.25165	9.51468	14.9374	16.763	10.1971	8.23281	8.80702
788.521	H75 C45 N1 O8 P1	-2.19ppm	PE 40:8	0	419828	421212	433216	553876	487143	254166	397991	436579	394905	565561	720433	317329	499246	556555	701387	385539	408689	226203	527612	404929	328488	335660	441515	260221	486913	310987	485744	390813	713533	269050	PE 40:8	0.743267	0.886375	0.831983	1.16434	0.959768	0.662771	0.696196	0.847072	0.734765	1.0703	1.43471	0.718407	0.771588	1.01959
742.538	H77 C41 N1 O8 P1	-0.35ppm	PE 36:3	1.65423e+06	4.33831e+06	3.39737e+06	3.4252e+06	3468121	3.65737e+06	2.58484e+06	3.83558e+06	3.07631e+06	3.70118e+06	3.86517e+06	3.86735e+06	2.81982e+06	3.6542e+06	3.30362e+06	4.02817e+06	2.83118e+06	3.30626e+06	2.3367e+06	4.40851e+06	3.56643e+06	2.93859e+06	2.92673e+06	3.16862e+06	2.5107e+06	3.74222e+06	3.07158e+06	3.00932e+06	2.70677e+06	2979888	2.48925e+06	PE 36:3	7.68057	7.14923	6.57803	7.29056	7.20574	6.74031	6.70948	5.96881	6.88646	7.31468	7.70167	6.38384	5.6476	6.05213
826.631	H89 C47 N1 O8 P1	-0.76ppm	PE 42:3	0	1.42059e+06	1.08716e+06	994261	703420	902775	740235	1.26194e+06	995494	1.03331e+06	824204	733142	744641	1.2408e+06	1.21149e+06	1.17834e+06	620938	1.04825e+06	735728	1.5128e+06	1232001	870120	652745	1.00185e+06	704726	1.28908e+06	1.08233e+06	846883	518527	687031	712815	PE 42:3	2.51503	2.28775	1.90946	1.4787	1.77865	1.93026	2.20747	1.93151	1.92259	1.55977	1.46002	1.68581	1.91766	2.21942
824.616	H87 C47 N1 O8 P1	-0.67ppm	PE 42:4	0	3.3825e+06	2.46551e+06	2.18591e+06	1.80538e+06	2.11921e+06	1.79676e+06	2.99096e+06	2.30781e+06	2.62826e+06	1.97206e+06	1.98154e+06	1.89728e+06	2.69996e+06	2.5129e+06	2.6439e+06	1.56542e+06	2.33505e+06	1.44939e+06	3.83248e+06	2734083	1.80693e+06	1.50899e+06	2.32868e+06	1.57021e+06	2.90126e+06	2.29019e+06	1.93487e+06	1.19939e+06	1.91534e+06	1.59362e+06	PE 42:4	5.9884	5.18827	4.19799	3.79521	4.17526	4.6853	5.23201	4.47773	4.89017	3.73205	3.94616	4.29529	4.17281	4.60357
822.6	H85 C47 N1 O8 P1	-0.96ppm	PE 42:5	0	3.74197e+06	3.23667e+06	2883723	2494922	2.72302e+06	2.08666e+06	3.69993e+06	2.96069e+06	3.45643e+06	2.68463e+06	2.4913e+06	2.37827e+06	3.54146e+06	3.1033e+06	3.0559e+06	1.98275e+06	2.89864e+06	2.06737e+06	4.45771e+06	3.4877e+06	2.50884e+06	2.10402e+06	2561187	2.27984e+06	3.60762e+06	2982847	2.39428e+06	1.65019e+06	2.31441e+06	2.34764e+06	PE 42:5	6.62481	6.81106	5.53813	5.24473	5.36488	5.44123	6.47218	5.74448	6.43108	5.08055	4.96132	5.38422	5.47336	5.68515
820.584	H83 C47 N1 O8 P1	-1.09ppm	PE 42:6	246442	2.89487e+06	2.29818e+06	2.12029e+06	2011856	2.18394e+06	1.75233e+06	3.00399e+06	2.23028e+06	2.49891e+06	2.09864e+06	1.96756e+06	1.89772e+06	2.6337e+06	2.61686e+06	2.57062e+06	1.71079e+06	2.04982e+06	1.64049e+06	3.54071e+06	2.74873e+06	2.06263e+06	1.50543e+06	2.03365e+06	1.90811e+06	3.06942e+06	2.24514e+06	1.75363e+06	1.51757e+06	1.69419e+06	1875270	PE 42:6	5.1251	4.83615	4.07197	4.22925	4.30279	4.56942	5.2548	4.32729	4.6495	3.97159	3.91832	4.29628	4.07041	4.79401
818.569	H81 C47 N1 O8 P1	-1.06ppm	PE 42:7	107922	1.1042e+06	1.06883e+06	893817	1116523	1.22417e+06	779325	1.23748e+06	977244	1.06186e+06	1.26075e+06	1.28617e+06	872510	1.23878e+06	1112076	1264725	1.07373e+06	969596	751622	1.50046e+06	1.17414e+06	916505	951051	890070	757249	1.28036e+06	975061	998029	945399	1.056e+06	800268	PE 42:7	1.95488	2.24918	1.71656	2.34711	2.41185	2.03219	2.1647	1.8961	1.9757	2.38592	2.56136	1.97529	1.91455	2.03729
714.507	H73 C39 N1 O8 P1	-0.28ppm	PE 34:3	0	322702	312314	273160	375929	390064	283465	398860	243316	360131	400268	404620	220158	313612	270475	320787	315185	287229	257747	360057	269046	214024	281731	274578	192484	362124	258369	237738	240657	194119	231025	PE 34:3	0.571314	0.657216	0.524599	0.790264	0.768504	0.739171	0.697715	0.472093	0.670064	0.757491	0.805784	0.498419	0.48469	0.495502
###	PhosphatidylethanolamineOx																																			0	0	0	0	0	0	0	0	0	0	0	0	0	0
756.519	H75 C41 N1 O9 P1	2.00ppm	PEOx 36:4	0	0	30232.2	207089	0	0	0	0	52273.6	184266	22543.7	0	0	0	51580.7	192759	0	0	22912	0	91225.4	82682.2	0	28959.7	25986.6	64505	27025.9	135901	0	0	0	PEOx 36:4	0	0.0636189	0.39771	0	0	0	0	0.101424	0.342847	0.0426631	0	0	0	0.0944943
784.549	H79 C43 N1 O9 P1	0.98ppm	PEOx 38:4	0	0	0	0	0	0	0	0	0	65566.1	0	0	0	0	0	203226	0	0	0	0	0	119820	0	40823.7	0	0	63855.2	128213	0	0	0	PEOx 38:4	0	0	0	0	0	0	0	0	0.121993	0	0	0	0	0
782.534	H77 C43 N1 O9 P1	0.94ppm	PEOx 38:5	0	0	0	136581	0	0	0	0	0	202309	0	0	0	0	0	242302	0	0	0	0	0	322038	0	0	0	0	85661.8	341403	0	0	0	PEOx 38:5	0	0	0.262302	0	0	0	0	0	0.376419	0	0	0	0	0
780.518	H75 C43 N1 O9 P1	0.70ppm	PEOx 38:6	0	0	30234.4	72119.5	0	0	0	2349.1	0	101470	0	0	0	0	0	118094	0	13467.2	0	0	99855.2	72182	15262.2	0	0	0	20482.8	78455.6	0	34336.9	14665.5	PEOx 38:6	0	0.0636235	0.138504	0	0	0	0.00410922	0	0.188796	0	0	0	0	0
812.579	H83 C45 N1 O9 P1	-0.78ppm	PEOx 40:4	0	0	0	109528	0	0	0	0	0	45141.7	0	0	0	34902.1	0	140949	0	0	25754.7	0	0	38883.8	0	36683	0	0	28339.7	40681.6	24665.5	0	0	PEOx 40:4	0	0	0.210347	0	0	0	0	0	0.0839912	0	0	0	0.0539415	0
806.533	H77 C45 N1 O9 P1	-0.60ppm	PEOx 40:7	0	0	0	0	0	0	0	0	0	0	0	0	0	0	0	66507.4	0	0	0	0	0	0	0	0	0	0	45724	51572	0	0	0	PEOx 40:7	0	0	0	0	0	0	0	0	0	0	0	0	0	0
842.627	H89 C47 N1 O9 P1	0.52ppm	PEOx 42:3	0	0	0	0	0	0	0	0	0	0	0	2345.1	0	0	0	20817.2	0	0	0	0	0	21121.9	0	0	0	0	36398.5	0	0	0	0	PEOx 42:3	0	0	0	0	0	0	0	0	0	0	0.00467017	0	0	0
																																				0	0	0	0	0	0	0	0	0	0	0	0	0	0
																																				0	0	0	0	0	0	0	0	0	0	0	0	0	0
###	PhosphatidylethanolamineOx2																																			0	0	0	0	0	0	0	0	0	0	0	0	0	0
798.529	H77 C43 N1 O10 P1	1.57ppm	PEOx2 38:5	14870.2	0	0	198608	0	0	0	0	0	157605	0	0	44880.4	0	93258.3	313118	21865	0	65656.8	0	120012	88845.8	0	34030.1	0	0	87158.7	247728	0	0	0	PEOx2 38:5	0	0	0.381422	0	0	0	0	0	0.293242	0	0	0.101606	0	0.170846
796.511	H75 C43 N1 O10 P1	-1.70ppm	PEOx2 38:6	0	0	0	54047.8	0	34536.1	0	0	0	0	0	0	0	0	0	55808.5	0	0	0	0	18272.2	35577.6	0	0	0	0	0	35823	0	0	0	PEOx2 38:6	0	0	0.103798	0	0.0680429	0	0	0	0	0	0	0	0	0
828.573	H83 C45 N1 O10 P1	-2.70ppm	PEOx2 40:4	0	0	0	22557.8	0	0	0	0	0	0	0	0	0	0	0	53248.5	0	0	29596.6	0	72990.9	0	0	18136.3	0	0	0	0	0	0	0	PEOx2 40:4	0	0	0.0433218	0	0	0	0	0	0	0	0	0	0	0
824.544	H79 C45 N1 O10 P1	0.61ppm	PEOx2 40:6	0	0	35489.8	124714	0	0	0	0	27040.9	153687	0	0	0	0	57882.1	166274	0	0	0	0	66747.9	101614	0	14927.9	0	0	58834.1	164724	0	0	0	PEOx2 40:6	0	0.0746827	0.239511	0	0	0	0	0.0524661	0.285952	0	0	0	0	0.106038
750.529	H77 C39 N1 O10 P1	1.58ppm	PEOx2 34:1	10292	34348.6	92302.1	456378	16789.3	14562.4	20989.2	45367.3	73246.8	104567	24292.3	14739.3	33462.5	2413.3	22340.3	4839.4	8392	4738.3	1292	38291	87493	372821	33922.3	23722.9	21920	32303.4	54932	234930	23829	34930	51123.3	PEOx2 34:1	0.060811	0.194235	0.876466	0.0352939	0.0286908	0.0547321	0.0793598	0.142117	0.194559	0.0459722	0.0293527	0.0757563	0.00372977	0.0409268
																																				0	0	0	0	0	0	0	0	0	0	0	0	0	0
###	PhosphatidylethanolamineOx3																																			0	0	0	0	0	0	0	0	0	0	0	0	0	0
788.507	H75 C41 N1 O11 P1	-0.70ppm	PEOx3 36:4	0	0	33210.7	58206.6	0	0	0	0	0	0	0	0	0	0	0	83492.4	0	0	0	0	0	34028.4	0	0	0	0	0	27961.7	0	0	0	PEOx3 36:4	0	0.0698867	0.111785	0	0	0	0	0	0	0	0	0	0	0
784.474	H71 C41 N1 O11 P1	-2.41ppm	PEOx3 36:6	20152	0	0	0	0	0	0	0	20425.8	22315.4	36631	0	0	0	0	21883.8	0	0	0	49508.4	0	100079	0	23113.3	0	0	0	18432.7	57282.3	23041.9	0	PEOx3 36:6	0	0	0	0	0	0	0	0.0396311	0.0415203	0.0693227	0	0	0	0
816.54	H79 C43 N1 O11 P1	2.17ppm	PEOx3 38:4	0	0	5189.8	148052	0	0	10834.2	0	0	195406	0	0	0	0	0	83992.6	0	0	0	0	59000.3	43920.2	0	0	0	0	37104.5	133833	0	0	0	PEOx3 38:4	0	0.0109211	0.284331	0	0	0.0282516	0	0	0.363575	0	0	0	0	0
814.522	H77 C43 N1 O11 P1	-0.94ppm	PEOx3 38:5	0	0	61266.7	261299	0	0	0	3457.1	0	237933	0	0	0	0	22415.1	253009	0	0	0	0	148932	108556	0	0	0	0	52258.9	283702	0	0	0	PEOx3 38:5	0	0.128926	0.50182	0	0	0	0.00604742	0	0.442701	0	0	0	0	0.0410638
844.572	H83 C45 N1 O11 P1	2.35ppm	PEOx3 40:4	0	37709.1	35720.9	0	20323.1	0	49468.2	0	0	39493.4	0	0	0	0	30988.8	109059	0	0	123100	0	39297.8	86542.4	0	0	14993.6	34857.7	38573.3	115404	0	0	0	PEOx3 40:4	0.0667605	0.075169	0	0.0427225	0	0.128995	0	0	0.0734819	0	0	0	0	0.0567706
842.554	H81 C45 N1 O11 P1	0.05ppm	PEOx3 40:5	0	0	0	81818.9	0	0	0	0	21031.5	49734.6	0	0	0	0	21708.2	61314.2	0	0	0	0	44357.3	65852.4	0	0	0	0	19837.7	50022	0	16614.6	0	PEOx3 40:5	0	0	0.157132	0	0	0	0	0.0408063	0.0925368	0	0	0	0	0.0397688
840.538	H79 C45 N1 O11 P1	-1.04ppm	PEOx3 40:6	0	0	0	115838	0	0	0	0	0	139360	0	0	0	0	75337.2	150556	0	0	0	0	67489.5	43498.9	0	0	0	0	30418	161649	0	0	0	PEOx3 40:6	0	0	0.222465	0	0	0	0	0	0.259295	0	0	0	0	0.138016
																																				0	0	0	0	0	0	0	0	0	0	0	0	0	0
																																				0	0	0	0	0	0	0	0	0	0	0	0	0	0
###	PhosphatidylethanolamineOx5																																			0	0	0	0	0	0	0	0	0	0	0	0	0	0
848.526	H79 C43 N1 O13 P1	-2.39ppm	PEOx5 38:4	0	0	0	0	0	0	0	0	0	130348	0	0	0	0	0	84813.8	0	0	0	0	0	49861.3	0	0	0	0	0	107534	0	0	0	PEOx5 38:4	0	0	0	0	0	0	0	0	0.242527	0	0	0	0	0
846.512	H77 C43 N1 O13 P1	-0.79ppm	PEOx5 38:5	0	0	0	24149.8	0	0	0	0	0	40407.5	0	0	0	0	0	0	0	0	0	0	0	0	0	0	0	0	0	34978.2	0	0	0	PEOx5 38:5	0	0	0.0463792	0	0	0	0	0	0.0751827	0	0	0	0	0
872.528	H79 C45 N1 O13 P1	0.04ppm	PEOx5 40:6	0	0	0	0	0	0	0	0	0	41923.1	0	0	0	0	0	0	0	0	0	0	0	31530.9	0	0	0	0	0	0	0	0	0	PEOx5 40:6	0	0	0	0	0	0	0	0	0.0780026	0	0	0	0	0
870.514	H77 C45 N1 O13 P1	0.90ppm	PEOx5 40:7	0	0	0	0	0	0	0	0	0	0	0	0	0	0	0	0	0	0	15997.1	0	0	32735.4	0	0	0	0	0	0	0	0	0	PEOx5 40:7	0	0	0	0	0	0	0	0	0	0	0	0	0	0
																																				0	0	0	0	0	0	0	0	0	0	0	0	0	0
																																				0	0	0	0	0	0	0	0	0	0	0	0	0	0
###	PhosphatidylethanolamineOx6																																			0	0	0	0	0	0	0	0	0	0	0	0	0	0
812.493	H75 C39 N1 O14 P1	1.44ppm	PEOx6 34:2	0	0	387053	630732	0	0	0	0	272261	362604	0	0	0	0	291184	605438	0	0	0	0	439794	460640	0	0	0	16965.2	356431	527291	0	0	0	PEOx6 34:2	0	0.814491	1.21131	0	0	0	0	0.528255	0.674665	0	0	0	0	0.53344
886.508	H77 C45 N1 O14 P1	-0.09ppm	PEOx6 40:7	0	0	0	73374.4	0	0	0	0	26353.1	53714	0	0	0	0	21962.2	86548.6	0	0	0	0	78807.4	0	0	0	0	0	0	120479	0	0	0	PEOx6 40:7	0	0	0.140914	0	0	0	0	0.0511316	0.0999409	0	0	0	0	0.0402341
																																				0	0	0	0	0	0	0	0	0	0	0	0	0	0
																																				0	0	0	0	0	0	0	0	0	0	0	0	0	0
[truncated: 46 more columns]

## Sheet: PS and PSOx
precursorexpmz$A	sumcomposition	precursorppmdev$A	name	intensity:Exp_Sebastian_2_00.mzML	intensity:Exp_Sebastian_2_01.mzML	intensity:Exp_Sebastian_2_02.mzML	intensity:Exp_Sebastian_2_03.mzML	intensity:Exp_Sebastian_2_04.mzML	intensity:Exp_Sebastian_2_05.mzML	intensity:Exp_Sebastian_2_06.mzML	intensity:Exp_Sebastian_2_07.mzML	intensity:Exp_Sebastian_2_08.mzML	intensity:Exp_Sebastian_2_09.mzML	intensity:Exp_Sebastian_2_10.mzML	intensity:Exp_Sebastian_2_11.mzML	intensity:Exp_Sebastian_2_12.mzML	intensity:Exp_Sebastian_2_13.mzML	intensity:Exp_Sebastian_2_14.mzML	intensity:Exp_Sebastian_2_15.mzML	intensity:Exp_Sebastian_2_16.mzML	intensity:Exp_Sebastian_2_17.mzML	intensity:Exp_Sebastian_2_18.mzML	intensity:Exp_Sebastian_2_19.mzML	intensity:Exp_Sebastian_2_20.mzML	intensity:Exp_Sebastian_2_21.mzML	intensity:Exp_Sebastian_2_22.mzML	intensity:Exp_Sebastian_2_23.mzML	intensity:Exp_Sebastian_2_24.mzML	intensity:Exp_Sebastian_2_25.mzML	intensity:Exp_Sebastian_2_26.mzML	intensity:Exp_Sebastian_2_27.mzML	intensity:Exp_Sebastian_2_28.mzML	intensity:Exp_Sebastian_2_29.mzML	intensity:Exp_Sebastian_2_30.mzML	name	intensity:Exp_Sebastian_2_01.mzML	intensity:Exp_Sebastian_2_02.mzML	intensity:Exp_Sebastian_2_03.mzML	intensity:Exp_Sebastian_2_04.mzML	intensity:Exp_Sebastian_2_05.mzML	intensity:Exp_Sebastian_2_06.mzML	intensity:Exp_Sebastian_2_07.mzML	intensity:Exp_Sebastian_2_08.mzML	intensity:Exp_Sebastian_2_09.mzML	intensity:Exp_Sebastian_2_10.mzML	intensity:Exp_Sebastian_2_11.mzML	intensity:Exp_Sebastian_2_12.mzML	intensity:Exp_Sebastian_2_13.mzML	intensity:Exp_Sebastian_2_14.mzML
					Ctrl.	Fento 1 µM	Fento 2 µM	Fento 1 µM + Toc	Fento 1 µM + Def	Fento 1 µM + Lip-1	Ctrl.	Fento 1 µM	Fento 2 µM	Fento 1 µM + Toc	Fento 1 µM + Def	Fento 1 µM + Lip-1	Ctrl.	Fento 1 µM	Fento 2 µM	Fento 1 µM + Toc	Fento 1 µM + Def	Fento 1 µM + Lip-1	Ctrl.	Fento 1 µM	Fento 2 µM	Fento 1 µM + Toc	Fento 1 µM + Def	Fento 1 µM + Lip-1	Ctrl.	Fento 1 µM	Fento 2 µM	Fento 1 µM + Toc	Fento 1 µM + Def	Fento 1 µM + Lip-1
###	Phosphatidylserine			0	1	2	3	4	5	6	7	8	9	10	11	12	13	14	15	16	17	18	19	20	21	22	23	24	25	26	27	28	29	30		Normalisation
762.529	H77 C40 N1 O10 P1	-0.63ppm	PS 34:0	1.78357e+07	1.03993e+07	1.28843e+07	1.19555e+07	1.03965e+07	1.05064e+07	1.10795e+07	1.65687e+07	10810953	1.72895e+07	1.63075e+07	1.96075e+07	1.12757e+07	1.31273e+07	1.41752e+07	1.67272e+07	16727605	18761533	1.65723e+07	14122368	1.46656e+07	17003055	1.81831e+07	16115324	1.60505e+07	1.82809e+07	1.27014e+07	14694757	2.05002e+07	1.81906e+07	1.99765e+07		1	2	3	4	5	6	7	8	9	10	11	12	13	14
706.466	H69 C36 N1 O10 P1	-0.41ppm	PS 30:0	0	85421.7	100064	78342	139052	159358	64844.7	112583	43875.1	140157	207628	263278	59198.1	80875.8	78090.4	97641	199631	59657.2	46074.8	106071	107180	56376	145031	38436.4	68613.2	115104	41548.5	53959	134658	66936	69528.6	PS 30:0	0.41071	0.388319	0.327639	0.668745	0.758388	0.292635	0.339745	0.20292	0.405324	0.636602	0.67137	0.262503	0.308045	0.275447
734.498	H73 C38 N1 O10 P1	-0.22ppm	PS 32:0	0	752382	779383	641205	759268	918716	577898	1.06616e+06	435846	1.04609e+06	1213311	1.50149e+06	483873	673891	687048	762004	1.11082e+06	386366	595677	1.16562e+06	789188	630844	1.02346e+06	343854	548809	1.25059e+06	592478	610028	928333	386817	646048	PS 32:0	3.61748	3.02455	2.68162	3.65157	4.37218	2.60797	3.21741	2.01576	3.0252	3.72009	3.82887	2.14565	2.56676	2.42341
874.654	H93 C48 N1 O10 P1	0.11ppm	PS 42:0	0	102971	89031.3	81889.6	26238	44471.7	77887.8	72316.1	10593.2	71097.9	40566	54417.4	0	94400.4	31587.3	76557.8	48137.2	48621.5	37926.2	117163	71500.2	51284	36469.7	22513.5	47782.7	129642	40250.5	36532.5	13624.2	49369.7	37841.7	PS 42:0	0.495089	0.345504	0.342475	0.126187	0.211641	0.351496	0.218231	0.0489929	0.20561	0.124378	0.138767	0	0.359558	0.111417
760.513	H75 C40 N1 O10 P1	-0.54ppm	PS 34:1	0	8.26598e+06	9.86022e+06	8.14744e+06	7795725	9.09149e+06	8.74833e+06	1.16955e+07	5.50424e+06	1.29525e+07	1.20158e+07	1.49752e+07	7.23968e+06	6.16468e+06	7.83508e+06	9.73286e+06	1.26425e+07	7359079	7.7597e+06	1.10827e+07	9026599	8380855	1.00454e+07	6.37487e+06	7.73628e+06	11616571	6.31066e+06	7.49655e+06	9.34179e+06	7.46138e+06	8.38523e+06	PS 34:1	39.7431	38.2646	34.0739	37.4922	43.2665	39.4799	35.2939	25.4568	37.4577	36.8413	38.1875	32.103	23.4804	27.6365
788.544	H79 C42 N1 O10 P1	-0.46ppm	PS 36:1	0	2.5374e+07	3.01542e+07	2.51048e+07	2.05369e+07	2.3088e+07	2.6543e+07	3.54264e+07	1.72062e+07	3.87453e+07	3.13486e+07	3.85111e+07	2.12627e+07	2.34148e+07	2.92799e+07	3.66037e+07	3.99246e+07	3.02355e+07	2.87348e+07	4.21695e+07	3.3867e+07	3.22164e+07	3.28157e+07	2.58381e+07	2.83581e+07	4.37623e+07	2.42935e+07	2.81746e+07	2.96142e+07	3.03522e+07	3.11752e+07	PS 36:1	121.999	117.019	104.992	98.7686	109.876	119.785	106.908	79.5775	112.049	96.117	98.2051	94.2854	89.1838	103.278
816.576	H83 C44 N1 O10 P1	-0.09ppm	PS 38:1	0	3.96128e+06	4.54644e+06	3.99242e+06	2.35282e+06	3.26266e+06	5.31995e+06	3.86554e+06	1.93326e+06	4.37502e+06	3.19873e+06	3.61664e+06	2.10991e+06	3.21583e+06	3.07846e+06	3.84891e+06	3.9764e+06	3.08766e+06	2.72412e+06	5.03923e+06	3.77688e+06	3.20412e+06	2.9843e+06	2.27752e+06	2.99099e+06	4.12382e+06	2.51496e+06	3.016e+06	2621329	2724018	2.72308e+06	PS 38:1	19.046	17.6434	16.6969	11.3155	15.5271	24.0082	11.6652	8.94122	12.6522	9.80752	9.22259	9.35601	12.2487	10.8586
844.607	H87 C46 N1 O10 P1	-0.23ppm	PS 40:1	0	5.65969e+06	6.42389e+06	5.36186e+06	2788194	4.06797e+06	7.38869e+06	5.26166e+06	2.69143e+06	0	3548348	4.19789e+06	2.66192e+06	5.04169e+06	4.32156e+06	5.30132e+06	4.91631e+06	4.59077e+06	3.62306e+06	7616869	5.51753e+06	4.47687e+06	3.8221e+06	3.26046e+06	0	5.89769e+06	3.52967e+06	4050838	3.00608e+06	3.99959e+06	3.52597e+06	PS 40:1	27.212	24.9292	22.4242	13.4093	19.3595	33.3441	15.8783	12.4477	0	10.8795	10.7048	11.8038	19.2031	15.2434
732.482	H71 C38 N1 O10 P1	-0.18ppm	PS 32:1	0	627409	778858	662240	827532	912207	649621	878121	439992	986735	1.22902e+06	1.52752e+06	532694	343550	481951	626244	1.08999e+06	485870	460331	666278	568870	544304	860801	445564	457955	713456	404434	455266	795205	464738	519854	PS 32:1	3.0166	3.02252	2.76959	3.97987	4.34121	2.93165	2.64994	2.03494	2.85357	3.76827	3.89526	2.36214	1.30854	1.69998
872.639	H91 C48 N1 O10 P1	-0.00ppm	PS 42:1	0	608790	716952	631482	383566	447591	556500	687216	339090	770806	566443	663509	301060	562266	574634	800717	760484	640884	368873	892930	772399	693424	611660	488109	402562	908846	533468	574710	447563	532035	395032	PS 42:1	2.92708	2.78228	2.64096	1.84469	2.13009	2.5114	2.07384	1.56827	2.22911	1.73675	1.69198	1.33499	2.1416	2.0269
814.56	H81 C44 N1 O10 P1	-0.08ppm	PS 38:2	0	1.14409e+06	1.3961e+06	1.14713e+06	901091	1.09135e+06	1383133	1.51328e+06	738578	1.68134e+06	1.41711e+06	1.73369e+06	904672	1.06444e+06	1.27431e+06	1.51817e+06	1.78108e+06	1.21038e+06	1.26891e+06	1.77578e+06	1.50856e+06	1385022	1.40217e+06	962142	1.28421e+06	1.80779e+06	1.03196e+06	1.18673e+06	1.29695e+06	1.15815e+06	1.34722e+06	PS 38:2	5.50084	5.41784	4.7975	4.33364	5.19377	6.24188	4.5667	3.41588	4.86232	4.34495	4.42098	4.0116	4.05431	4.49484
842.591	H85 C46 N1 O10 P1	-0.42ppm	PS 40:2	0	1.57301e+06	1.96131e+06	1.6985e+06	1.11716e+06	1.42571e+06	2.11945e+06	1.702e+06	852157	1980279	1.4652e+06	1.69782e+06	985343	1.43139e+06	1.41297e+06	1.66668e+06	1.93495e+06	1.42458e+06	1.34715e+06	2.26506e+06	1.82278e+06	1.53963e+06	1.46921e+06	1.10666e+06	1.33613e+06	1.99558e+06	1.20419e+06	1.40203e+06	1.3336e+06	1.30258e+06	1.36842e+06	PS 40:2	7.56309	7.61126	7.10338	5.3728	6.78497	9.56475	5.13618	3.94117	5.72682	4.49239	4.32951	4.36932	5.45199	4.98395
730.466	H69 C38 N1 O10 P1	-0.13ppm	PS 32:2	0	0	0	0	0	9624.7	0	0	0	0	9000.7	12683.2	0	0	0	0	0	7979.8	6728	0	0	0	10953.5	0	0	0	0	0	0	0	0	PS 32:2	0	0	0	0	0.0458041	0	0	0	0	0.0275967	0.0323427	0	0	0
758.497	H73 C40 N1 O10 P1	-0.43ppm	PS 34:2	0	582558	744627	553714	560362	658721	639922	887332	404359	986068	903829	1.11892e+06	523070	394124	553692	682443	881072	482490	556194	743872	616875	598914	691641	421435	560348	742030	471220	490943	618906	467076	574715	PS 34:2	2.80096	2.88968	2.31572	2.69497	3.13486	2.88787	2.67774	1.87013	2.85164	2.7712	2.85331	2.31946	1.50117	1.95303
786.529	H77 C42 N1 O10 P1	-0.63ppm	PS 36:2	0	4.57437e+06	5.70798e+06	4.65089e+06	3.83101e+06	4426640	5.06128e+06	6.70521e+06	3.07252e+06	7391625	6.23971e+06	7.66724e+06	4.04822e+06	4.08599e+06	5.33354e+06	6.59653e+06	7.36675e+06	4.77802e+06	5.27613e+06	7.29063e+06	6.18681e+06	5.83276e+06	6.11422e+06	4.22057e+06	5.07677e+06	7.53482e+06	4343107	5.15288e+06	5.45419e+06	4.9117e+06	5.59536e+06	PS 36:2	21.9937	22.1509	19.4507	18.4246	21.0664	22.8408	20.2346	14.2102	21.376	19.1314	19.5518	17.9511	15.563	18.8129
870.623	H89 C48 N1 O10 P1	-0.14ppm	PS 42:2	0	686208	761737	631532	422498	521150	749643	676388	351016	784026	585462	692556	322538	568801	603577	741777	840489	624614	488146	918734	737726	628976	636138	446684	454434	792683	490096	555236	561016	543624	467139	PS 42:2	3.29931	2.95607	2.64117	2.03193	2.48016	3.38303	2.04116	1.62343	2.26735	1.79506	1.76605	1.43024	2.16648	2.12899
808.514	H75 C44 N1 O10 P1	1.07ppm	PS 38:5	0	471417	649774	467630	532311	630658	430330	687553	342824	800957	887037	1.12601e+06	375672	337332	465358	532153	940536	381550	446100	623445	545395	507810	748202	344172	399907	627185	351156	448214	650382	384281	445759	PS 38:5	2.26659	2.52158	1.9557	2.56006	3.00131	1.94201	2.07486	1.58554	2.31631	2.71971	2.87137	1.66585	1.28485	1.64145
806.498	H73 C44 N1 O10 P1	-0.22ppm	PS 38:6	0	275473	300625	247007	418388	446498	224722	336065	154082	433621	596847	759783	189772	176579	201297	247670	577397	152859	186814	263910	208193	246228	461638	152195	149330	314117	181652	176331	447356	193863	179832	PS 38:6	1.32448	1.16664	1.03302	2.01217	2.12489	1.01414	1.01416	0.712618	1.254	1.82997	1.93748	0.841508	0.672567	0.71003
784.513	H75 C42 N1 O10 P1	-0.43ppm	PS 36:3	126078	559993	507855	463973	409880	487984	411362	597260	311453	696638	629126	747040	392302	386519	467766	571974	693803	400651	430109	534366	541824	519575	584477	353439	446779	661713	366078	431174	481416	386802	493469	PS 36:3	2.69246	1.97083	1.94041	1.97125	2.32232	1.85642	1.80237	1.44045	2.01463	1.92894	1.90499	1.73959	1.4722	1.64994
756.481	H71 C40 N1 O10 P1	-1.03ppm	PS 34:3	0	25793.8	22209	9358.1	20047.5	16386.9	24853.9	23704	0	28337.2	49097.8	60046.4	22477.9	0	10807.1	0	58620.3	0	22738.4	20333.5	0	21785.1	26603.3	0	34425.7	25696.8	0	17493.9	25273.7	0	28506.5	PS 34:3	0.124017	0.0861865	0.0391371	0.096415	0.0779855	0.112162	0.0715325	0	0.0819491	0.150537	0.153121	0.0996741	0	0.0381197
840.576	H83 C46 N1 O10 P1	-0.41ppm	PS 40:3	0	1.58579e+06	1772463	1420814	905824	1.11725e+06	1829850	1.64775e+06	775194	1.66201e+06	1.25415e+06	1.40875e+06	857847	1.3283e+06	1.2271e+06	1.54257e+06	1.69574e+06	1.046e+06	1.21053e+06	2.00911e+06	1.51228e+06	1.28984e+06	1.27098e+06	856218	1.23685e+06	1.73336e+06	1.02365e+06	1.25547e+06	1.07375e+06	1.04211e+06	1.20117e+06	PS 40:3	7.62454	6.8784	5.94207	4.3564	5.31699	8.25784	4.97249	3.58522	4.8064	3.8453	3.59236	3.80396	5.05932	4.32833
838.56	H81 C46 N1 O10 P1	-0.46ppm	PS 40:4	0	5.9107e+06	7.04111e+06	5.90841e+06	4.85486e+06	5.38125e+06	5.35621e+06	8.57295e+06	3.90029e+06	9.06101e+06	7550015	9.14356e+06	4.38847e+06	4.71176e+06	5.69078e+06	6.79484e+06	8.2682e+06	4.55191e+06	5.15908e+06	8.16727e+06	6.60993e+06	6.07635e+06	6.83412e+06	3.78279e+06	5.12347e+06	8.83997e+06	4.61512e+06	5.12729e+06	6.06865e+06	4.35172e+06	5.38782e+06	PS 40:4	28.4188	27.3244	24.7099	23.3486	25.6094	24.1718	25.8709	18.0386	26.2038	23.1488	23.3165	19.4599	17.9464	20.073
836.544	H79 C46 N1 O10 P1	-0.75ppm	PS 40:5	0	7.15883e+06	8.29917e+06	6428458	6.17477e+06	6635595	5.64459e+06	1.04519e+07	4.72107e+06	1.0426e+07	9.65078e+06	12225530	4.8657e+06	7.03302e+06	8.11386e+06	9.24067e+06	1.31576e+07	5.43842e+06	7.03577e+06	1.22257e+07	9.51795e+06	8.38275e+06	10526158	4.70664e+06	6.78246e+06	1.30022e+07	6.41925e+06	7.19863e+06	9.54389e+06	5.32175e+06	7.61791e+06	PS 40:5	34.4199	32.2066	26.8848	29.6965	31.5789	25.4732	31.5411	21.8347	30.1514	29.5899	31.1757	21.5761	26.7878	28.6199
834.529	H77 C46 N1 O10 P1	0.43ppm	PS 40:6	0	5.75518e+06	6.57445e+06	5.29246e+06	4.74965e+06	5.30056e+06	4.77808e+06	8.23428e+06	3.70097e+06	8.11794e+06	7.56558e+06	9.33147e+06	3.70409e+06	5398211	6.40012e+06	7.65517e+06	9902460	4.05888e+06	5.33144e+06	9.79898e+06	7.4357e+06	6.85619e+06	7.8463e+06	3.37818e+06	5.19619e+06	1.02372e+07	5.17345e+06	5.7723e+06	7.0822e+06	3.86531e+06	5.79111e+06	PS 40:6	27.6711	25.5135	22.1339	22.8426	25.2255	21.5628	24.8489	17.1168	23.4765	23.1966	23.7957	16.4251	20.561	22.575
832.514	H75 C46 N1 O10 P1	0.27ppm	PS 40:7	0	304109	315462	233201	257258	314252	236626	359552	203342	393635	416083	502563	192109	223000	287867	263339	473530	191535	198700	372246	319675	279299	396737	154771	220445	386578	218050	204289	366924	205371	242773	PS 40:7	1.46217	1.22421	0.975283	1.23724	1.49553	1.06786	1.08503	0.940446	1.13836	1.27574	1.28156	0.851872	0.849376	1.01539
812.544	H79 C44 N1 O10 P1	-0.20ppm	PS 38:3	0	2.76807e+06	3.16493e+06	2611540	2.23573e+06	2.50906e+06	2.67452e+06	3.90201e+06	1.79338e+06	4.17978e+06	3.51586e+06	4.20776e+06	2.15128e+06	2.33492e+06	2.90349e+06	3.68154e+06	4.06092e+06	2.30292e+06	2.87906e+06	4.27849e+06	3.40002e+06	3.18251e+06	3.45438e+06	1.99158e+06	2842494	4.47143e+06	2.43114e+06	2.71432e+06	3.10167e+06	2.32205e+06	3.05579e+06	PS 38:3	13.309	12.2822	10.9219	10.7523	11.9407	12.0697	11.7752	8.29427	12.0876	10.7798	10.73	9.53944	8.89337	10.2414
810.529	H77 C44 N1 O10 P1	-0.13ppm	PS 38:4	0	2509427	2.8781e+06	2.25225e+06	1.79973e+06	2.05568e+06	2.3273e+06	3.38463e+06	1293718	3574920	2.77357e+06	3.49231e+06	1.68842e+06	1.48021e+06	1.89569e+06	2.33139e+06	2.76195e+06	1103113	2.03874e+06	2991620	2.19865e+06	1.96128e+06	2.15026e+06	873252	1.92181e+06	3.11242e+06	1.44793e+06	1618644	1.71599e+06	1.07863e+06	2.11758e+06	PS 38:4	12.0654	11.1691	9.41925	8.65551	9.78303	10.5028	10.2139	5.98337	10.3384	8.50396	8.90555	7.48699	5.63791	6.68664
782.497	H73 C42 N1 O10 P1	-0.38ppm	PS 36:4	0	279983	223757	241063	203496	276809	181747	237196	110857	305284	341359	365496	168507	110629	137902	200579	267002	120478	139799	177664	195020	183687	245873	101881	152815	197448	119109	133459	206397	123397	155040	PS 36:4	1.34617	0.868333	1.00816	0.978681	1.31734	0.820197	0.715794	0.512707	0.882858	1.04663	0.93203	0.747213	0.421369	0.486421
868.607	H87 C48 N1 O10 P1	-0.11ppm	PS 42:3	0	1724457	1860238	1.47298e+06	779294	1.0332e+06	1787863	1.56847e+06	724380	1.58028e+06	938312	1.14743e+06	681525	1.38013e+06	1.10597e+06	1.2712e+06	1176437	1.0686e+06	1.03413e+06	2.01993e+06	1.38417e+06	1.04733e+06	1.03908e+06	844450	979091	1.60871e+06	919321	939834	771441	1004047	885465	PS 42:3	8.29124	7.21903	6.16024	3.74788	4.917	8.06836	4.73324	3.35021	4.57006	2.87693	2.92599	3.0221	5.25673	3.90106
866.591	H85 C48 N1 O10 P1	-0.39ppm	PS 42:4	0	1.50828e+06	1.61427e+06	1.39819e+06	761109	1.06138e+06	1.6319e+06	1.41169e+06	724143	1.45601e+06	1.1125e+06	1.22747e+06	647904	1.33543e+06	1.06399e+06	1.17403e+06	1.33302e+06	1.0553e+06	915210	1.90126e+06	1341942	1079923	1.11797e+06	765339	996432	1.42734e+06	904325	880717	907082	828825	874030	PS 42:4	7.25185	6.26449	5.84746	3.66042	5.05114	7.36455	4.26012	3.34912	4.21068	3.411	3.13011	2.87301	5.08645	3.75298
###	PhosphatidylserineOx1																																			0	0	0	0	0	0	0	0	0	0	0	0	0	0
802.524	H77 C42 N1 O11 P1	0.22ppm	PSOx1 36:2	0	0	0	9188.9	0	0	0	0	0	13929.3	9238.1	0	0	0	0	20057.1	17520.1	75239.3	0	0	10383.7	27321.4	0	44372.8	7221.3	0	0	19228.4	0	70034.1	0	PSOx1 36:2	0	0	0.0384294	0	0	0	0	0	0.0402825	0.0283246	0	0	0	0
806.555	H81 C42 N1 O11 P1	0.19ppm	PSOx1 36:0	28921.6	36100.9	14769.5	10177.5	18569.8	0	9633	0	8595.4	20443.7	0	26048.7	16989.8	0	0	11709.8	0	26077.1	7293.1	0	17618.4	0	14829.8	13427	6769.6	0	0	0	9833.9	22262.7	11694.4	PSOx1 36:0	0.173574	0.057316	0.0425639	0.0893083	0	0.0434723	0	0.0397532	0.0591217	0	0.0664254	0.0753382	0	0
776.509	H75 C40 N1 O11 P1	0.21ppm	PSOx1 34:1	0	0	0	0	0	0	0	0	0	0	0	0	0	0	0	0	0	11879.4	5890.6	0	0	0	0	10148.7	0	0	0	0	0	13297.1	0	PSOx1 34:1	0	0	0	0	0	0	0	0	0	0	0	0	0	0
804.539	H79 C42 N1 O11 P1	-0.19ppm	PSOx1 36:1	54634.6	11050.2	359014	50303.9	73427.4	41879.9	82072.3	139660	59247.1	117787	72994.1	36383.5	74328.1	73721	79437.7	81499.9	94465.8	276988	102699	42652.5	84091.5	86930	78088.4	229414	83823.2	74967.5	75988.7	95782.3	77491.6	11660.6	101622	PSOx1 36:1	0.0531297	1.39322	0.210379	0.353137	0.199307	0.37038	0.421459	0.274014	0.340632	0.223805	0.0927796	0.329594	0.280793	0.280199
832.571	H83 C44 N1 O11 P1	0.37ppm	PSOx1 38:1	0	14353.3	159486	10674.7	0	0	7217	0	0	0	0	0	0	0	0	8102.6	0	0	6466.3	0	0	0	0	0	6157.9	0	0	10885.9	0	0	9571.8	PSOx1 38:1	0.0690111	0.618916	0.0446433	0	0	0.0325693	0	0	0	0	0	0	0	0
860.601	H87 C46 N1 O11 P1	-0.82ppm	PSOx1 40:1	0	25232.8	345678	28480.8	0	25298.1	23894.5	12065.6	297134	29269	0	53659.6	0	43108.8	232119	21229.8	14509	13061.9	19768.8	46524.3	27685	29014.4	0	29268.1	24898.3	0	21601.3	11803.1	8273.3	15202.4	22109.2	PSOx1 40:1	0.12132	1.34147	0.119111	0	0.120394	0.107832	0.0364108	1.37423	0.0846438	0	0.136834	0	0.164195	0.818748
856.571	H83 C46 N1 O11 P1	-0.29ppm	PSOx1 40:3	0	10820.8	0	0	0	0	10143.2	0	0	0	0	0	0	0	0	15967.1	0	0	0	0	0	0	0	0	0	0	0	9563.8	0	0	0	PSOx1 40:3	0.0520268	0	0	0	0	0.0457748	0	0	0	0	0	0	0	0
854.555	H81 C46 N1 O11 P1	-0.08ppm	PSOx1 40:4	0	15025.7	112643	0	0	0	0	0	0	37182.9	0	0	0	0	0	21229	0	32451.4	0	0	0	11620.1	0	10634.8	0	0	14126.6	28122.2	0	11978.9	0	PSOx1 40:4	0.072244	0.437133	0	0	0	0	0	0	0.10753	0	0	0	0	0
852.54	H79 C46 N1 O11 P1	0.04ppm	PSOx1 40:5	0	0	28016.4	17972.8	0	13716.9	16122	9548.3	203473	103074	8105.7	24540.3	0	10102.8	24605.2	67466.1	0	18015.2	13038.8	12050.5	432185	51765.4	0	37425.5	17579.1	30232.2	18099.3	59665	11232.7	15787.1	0	PSOx1 40:5	0	0.108723	0.0751651	0	0.0652789	0.0727562	0.0288143	0.941052	0.298082	0.0248526	0.0625789	0	0.0384802	0.0867895
850.523	H77 C46 N1 O11 P1	-0.88ppm	PSOx1 40:6	0	0	0	18823.6	0	10319.9	10789.5	14794.4	0	51735.9	0	13152.7	0	0	124473	62193.8	14415.7	24051.7	9492.8	0	11821.9	27350.6	12324.2	0	6360.9	0	0	49363.6	0	21066.9	8717.3	PSOx1 40:6	0	0	0.0787233	0	0.0491126	0.0486914	0.0446456	0	0.149616	0	0.03354	0	0	0.439051
848.509	H75 C46 N1 O11 P1	1.18ppm	PSOx1 40:7	6902.8	0	0	38702.4	0	0	0	0	0	12861	11372.7	0	11016.4	0	0	24392	0	0	17049	0	21727	59137.3	24127.6	8621.6	24114.5	0	0	17900.6	0	0	15996.6	PSOx1 40:7	0	0	0.16186	0	0	0	0	0	0.0371931	0.0348695	0	0.0488502	0	0
846.492	H73 C46 N1 O11 P1	-0.82ppm	PSOx1 40:8	0	0	0	0	11951	0	9331.9	13402.5	16834.7	0	10002.1	26185.9	0	0	0	0	31273.9	0	7242.8	0	14039.4	0	0	0	0	12190.7	0	0	9370.5	0	12165.1	PSOx1 40:8	0	0	0	0.0574763	0	0.0421135	0.0404452	0.0778595	0	0.0306671	0.0667752	0	0	0
																																				0	0	0	0	0	0	0	0	0	0	0	0	0	0
###	PhosphatidylserineOx2																																			0	0	0	0	0	0	0	0	0	0	0	0	0	0
848.565	H83 C44 N1 O12 P1	-1.08ppm	PSOx2 38:1	0	0	0	26593.8	0	0	10310	0	0	0	0	0	0	10497.2	0	9338.5	0	8353.6	7469.5	0	0	0	0	0	12736.3	0	0	20531.4	0	0	0	PSOx2 38:1	0	0	0.111219	0	0	0.0465275	0	0	0	0	0	0	0.0399824	0
846.549	H81 C44 N1 O12 P1	-1.20ppm	PSOx2 38:2	0	29738.1	51214	77968.3	0	29880.3	42520.9	33716	17142.9	52162.6	43530.2	27440.9	11911.1	20138.5	19716.3	41942.3	12881.2	58179.5	40365.9	38646.7	28010.5	52454.2	22502.9	25463.7	33843.3	45201.8	25985.6	34807.3	11094.8	30825.9	20741.7	PSOx2 38:2	0.142982	0.198746	0.326076	0	0.142201	0.191891	0.101746	0.0792849	0.15085	0.133466	0.0699755	0.0528176	0.0767048	0.0695449
874.58	H85 C46 N1 O12 P1	-1.52ppm	PSOx2 40:2	0	221821	77651.7	126670	11241.4	80854.5	79517.1	41620.4	23641.5	44902.3	18909	26028.6	31818.5	67438.2	31579.3	58742.3	17168.2	25017.3	30711.3	22017	88674.4	62649.7	55621.8	18970.6	32183.6	59688.3	52684	67244.5	0	33779.3	9655.7	PSOx2 40:2	1.06652	0.301343	0.529754	0.0540636	0.384788	0.358849	0.125599	0.10934	0.129854	0.0579763	0.0663741	0.141093	0.256863	0.111389
834.456	H69 C44 N1 O12 P1	-0.51ppm	PSOx2 38:8	0	0	0	9907.8	0	0	0	10047.9	8392.6	0	0	15741.2	0	0	0	20168.5	0	0	0	14325.8	0	11045.8	0	0	0	0	0	9603	0	0	0	PSOx2 38:8	0	0	0.041436	0	0	0	0.0303219	0.0388153	0	0	0.0401408	0	0	0
838.489	H73 C44 N1 O12 P1	1.07ppm	PSOx2 38:6	0	14161.6	22366.9	31351.5	0	0	0	0	0	0	0	0	0	0	0	14521	0	0	0	0	7892.6	13371.7	0	0	8431.9	0	0	0	0	0	0	PSOx2 38:6	0.0680894	0.0867993	0.131117	0	0	0	0	0	0	0	0	0	0	0
868.534	H79 C46 N1 O12 P1	-0.34ppm	PSOx2 40:5	0	0	0	10253	0	0	0	0	0	20819.6	0	0	0	0	0	25998.3	0	0	0	0	0	14138.4	0	0	0	0	0	14350.4	0	15495.7	0	PSOx2 40:5	0	0	0.0428797	0	0	0	0	0	0.0602088	0	0	0	0	0
866.518	H77 C46 N1 O12 P1	-1.56ppm	PSOx2 40:6	0	9769.7	0	16568.9	0	0	0	0	0	15300.5	0	0	0	0	0	0	0	0	5863.6	0	0	0	0	0	0	0	0	19828.8	0	0	0	PSOx2 40:6	0.046973	0	0.0692938	0	0	0	0	0	0.0442479	0	0	0	0	0
[truncated: 16 more columns]

## Sheet: PA and PAOx
precursorexpmz$A	sumcomposition	precursorppmdev$A	name	intensity:Exp_Sebastian_2_00.mzML	intensity:Exp_Sebastian_2_01.mzML	intensity:Exp_Sebastian_2_02.mzML	intensity:Exp_Sebastian_2_03.mzML	intensity:Exp_Sebastian_2_04.mzML	intensity:Exp_Sebastian_2_05.mzML	intensity:Exp_Sebastian_2_06.mzML	intensity:Exp_Sebastian_2_07.mzML	intensity:Exp_Sebastian_2_08.mzML	intensity:Exp_Sebastian_2_09.mzML	intensity:Exp_Sebastian_2_10.mzML	intensity:Exp_Sebastian_2_11.mzML	intensity:Exp_Sebastian_2_12.mzML	intensity:Exp_Sebastian_2_13.mzML	intensity:Exp_Sebastian_2_14.mzML	intensity:Exp_Sebastian_2_15.mzML	intensity:Exp_Sebastian_2_16.mzML	intensity:Exp_Sebastian_2_17.mzML	intensity:Exp_Sebastian_2_18.mzML	intensity:Exp_Sebastian_2_19.mzML	intensity:Exp_Sebastian_2_20.mzML	intensity:Exp_Sebastian_2_21.mzML	intensity:Exp_Sebastian_2_22.mzML	intensity:Exp_Sebastian_2_23.mzML	intensity:Exp_Sebastian_2_24.mzML	intensity:Exp_Sebastian_2_25.mzML	intensity:Exp_Sebastian_2_26.mzML	intensity:Exp_Sebastian_2_27.mzML	intensity:Exp_Sebastian_2_28.mzML	intensity:Exp_Sebastian_2_29.mzML	intensity:Exp_Sebastian_2_30.mzML	name	intensity:Exp_Sebastian_2_01.mzML	intensity:Exp_Sebastian_2_02.mzML	intensity:Exp_Sebastian_2_03.mzML	intensity:Exp_Sebastian_2_04.mzML	intensity:Exp_Sebastian_2_05.mzML	intensity:Exp_Sebastian_2_06.mzML	intensity:Exp_Sebastian_2_07.mzML	intensity:Exp_Sebastian_2_08.mzML	intensity:Exp_Sebastian_2_09.mzML	intensity:Exp_Sebastian_2_10.mzML	intensity:Exp_Sebastian_2_11.mzML	intensity:Exp_Sebastian_2_12.mzML	intensity:Exp_Sebastian_2_13.mzML	intensity:Exp_Sebastian_2_14.mzML
					Ctrl.	Fento 1 µM	Fento 2 µM	Fento 1 µM + Toc	Fento 1 µM + Def	Fento 1 µM + Lip-1	Ctrl.	Fento 1 µM	Fento 2 µM	Fento 1 µM + Toc	Fento 1 µM + Def	Fento 1 µM + Lip-1	Ctrl.	Fento 1 µM	Fento 2 µM	Fento 1 µM + Toc	Fento 1 µM + Def	Fento 1 µM + Lip-1	Ctrl.	Fento 1 µM	Fento 2 µM	Fento 1 µM + Toc	Fento 1 µM + Def	Fento 1 µM + Lip-1	Ctrl.	Fento 1 µM	Fento 2 µM	Fento 1 µM + Toc	Fento 1 µM + Def	Fento 1 µM + Lip-1
###	PhosphatidicAcid			0	1	2	3	4	5	6	7	8	9	10	11	12	13	14	15	16	17	18	19	20	21	22	23	24	25	26	27	28	29	30		Normalisation
675.497	H72 C37 O8 P1	-0.68ppm	PA 34:0	4.14916e+06	2.9028e+06	3.90154e+06	3.88477e+06	2.76024e+06	2.59294e+06	3129575	5.01463e+06	2.6262e+06	5.34007e+06	4.89287e+06	6.18322e+06	2.8711e+06	3.93232e+06	5.11177e+06	5.69726e+06	5.65957e+06	6.4686e+06	5.37644e+06	4.27442e+06	4.86746e+06	5791011	6060973	5.74081e+06	5.51894e+06	6.04012e+06	4.50628e+06	5.14509e+06	6.91049e+06	6.225e+06	6.65959e+06		1	2	3	4	5	6	7	8	9	10	11	12	13	14
619.434	H64 C33 O8 P1	-0.74ppm	PA 30:0	0	60302.9	63783.4	82024.9	47429.7	59130.8	68111.6	109602	44038.6	68917.3	92818.1	63197.2	49754	38594.6	63895.9	78073.7	76317.7	35055.4	64950.8	60688.1	54216.9	67077.5	51883.7	45697	51043.5	102480	40710.1	60588.1	66820.9	69829.3	70012.2	PA 30:0	0.623222	0.490447	0.633434	0.515496	0.684137	0.652915	0.655694	0.503068	0.387171	0.569102	0.306623	0.519877	0.294442	0.374993
647.465	H68 C35 O8 P1	-0.46ppm	PA 32:0	0	250915	305930	296187	180834	172612	251658	369430	142424	342210	252447	322692	195172	177077	222218	275790	267342	226099	187289	278880	215483	255410	221005	216974	185081	320957	173844	226449	209856	243633	190819	PA 32:0	2.59317	2.35238	2.28729	1.96542	1.9971	2.41239	2.21011	1.62696	1.92251	1.54785	1.56565	2.03935	1.35094	1.30416
645.45	H66 C35 O8 P1	-0.46ppm	PA 32:1	0	159679	187704	154890	104447	123278	190863	228500	77095.3	178643	191196	235747	110852	118650	144680	153131	171038	134950	142223	211364	128064	167740	154040	132643	151496	245436	115717	130448	158028	147979	166419	PA 32:1	1.65026	1.44331	1.19613	1.13519	1.42632	1.82961	1.367	0.880686	1.0036	1.1723	1.14381	1.15828	0.905194	0.849097
673.481	H70 C37 O8 P1	-0.69ppm	PA 34:1	0	537848	604407	505671	398522	406016	573684	844834	290469	709082	615004	694929	434002	424826	527383	593544	628968	578220	497178	728404	515272	543201	532118	550392	497038	830792	431212	459552	542832	624045	512377	PA 34:1	5.55858	4.64744	3.90502	4.33139	4.69756	5.49932	5.05421	3.31812	3.98356	3.77082	3.37169	4.53486	3.24104	3.09511
701.512	H74 C39 O8 P1	-0.44ppm	PA 36:1	0	187941	261873	238586	156924	179029	216818	345969	142361	355429	235640	279003	165743	199921	245549	311040	324353	374163	218590	349291	268518	290290	256044	316058	219109	397345	200802	282281	229577	357823	215360	PA 36:1	1.94234	2.01361	1.84247	1.70555	2.07134	2.07841	2.06976	1.62624	1.99676	1.4448	1.35368	1.73184	1.52522	1.44108
643.434	H64 C35 O8 P1	-0.93ppm	PA 32:2	0	0	0	0	0	0	6429	23008.8	0	18699.4	16278.3	24841.8	0	0	11295.4	12494.7	16651	0	5784	0	12412.5	0	0	0	18119.9	12571.5	0	0	15689	0	9841.2	PA 32:2	0	0	0	0	0	0.0616282	0.13765	0	0.105051	0.0998083	0.120528	0	0	0.0662905
671.466	H68 C37 O8 P1	-0.22ppm	PA 34:2	0	132849	160683	140979	113303	112175	165253	212985	43824.8	188231	178908	216182	117753	103468	130888	145648	188187	131876	115898	177221	136674	134846	159331	98991.9	136578	212799	109648	116432	155539	143137	164647	PA 34:2	1.37298	1.23554	1.0887	1.23145	1.29786	1.58411	1.27418	0.500626	1.05746	1.09695	1.04888	1.23039	0.789367	0.768158
699.497	H72 C39 O8 P1	-0.53ppm	PA 36:2	0	219077	275254	217812	167640	225243	245146	365904	126832	308152	254217	309532	178724	185190	221341	275921	280906	287906	229301	327656	247936	219336	254098	211631	225622	356928	188174	189152	232657	275693	228753	PA 36:2	2.26413	2.1165	1.68204	1.82201	2.60604	2.34996	2.18902	1.44884	1.73117	1.5587	1.5018	1.86747	1.41283	1.29901
669.45	H66 C37 O8 P1	-0.49ppm	PA 34:3	0	12744.8	0	9512.8	0	0	6639	19526.9	7462.5	17201.5	0	29952.9	10959	21964.7	10310.8	0	34352.7	16815.3	11528.1	18431.3	0	8698.7	25018.6	12431.1	13963.4	14456.4	6142.1	0	9153.9	0	15966.4	PA 34:3	0.131716	0	0.0734622	0	0	0.0636412	0.11682	0.0852467	0.0966364	0	0.145327	0.11451	0.167571	0.0605121
697.481	H70 C39 O8 P1	-0.42ppm	PA 36:3	0	66279.2	72816.5	40338.3	41594	55100.3	67364.2	97549.9	20713.1	63245	92850.2	137918	53486.9	42596.7	55014	72057.1	124353	55220.1	81332.2	81358	52355.5	45854.9	109440	37897.8	68384.1	92036.4	42895.9	52902.1	74522.7	63112.5	66668	PA 36:3	0.684986	0.559905	0.311511	0.45207	0.637505	0.645751	0.583592	0.236613	0.355304	0.569299	0.669154	0.558882	0.324974	0.322867
695.465	H68 C39 O8 P1	-0.49ppm	PA 36:4	0	57515.9	74292.3	50371.9	78655	65164.2	73180.3	112542	19561.6	89885.7	111786	128847	68292.9	25320.2	48908	41415.3	82520.7	37743.4	62028.5	67605.9	34666.7	31984.1	63378.3	50712	68420.6	100640	26817	78167.9	66318.5	36618.5	57036.6	PA 36:4	0.594419	0.571253	0.388995	0.854872	0.753943	0.701504	0.673281	0.223459	0.504969	0.685399	0.625144	0.713589	0.19317	0.287032
693.45	H66 C39 O8 P1	-0.53ppm	PA 36:5	0	0	0	0	0	0	9476.4	9819.8	0	0	0	19190.2	0	0	7037.9	11204.1	10016.5	0	10115.8	12185.1	0	9525.9	10844.6	0	8699.2	0	0	11283.8	14098.7	0	0	PA 36:5	0	0	0	0	0	0.0908404	0.0587469	0	0	0	0.0931078	0	0	0.0413041
723.497	H72 C41 O8 P1	-0.04ppm	PA 38:4	0	129903	140450	101400	103557	142687	99915.7	201001	77961.5	193930	157876	258860	73901.3	83699.2	112743	131507	211628	167519	86254.4	153304	81924.8	120621	183709	141946	83206.4	187053	74466.2	81064.6	137927	178652	84936.7	PA 38:4	1.34253	1.07996	0.783055	1.12553	1.65087	0.957789	1.20249	0.890581	1.08948	0.967995	1.25595	0.772191	0.638549	0.661667
721.481	H70 C41 O8 P1	-0.34ppm	PA 38:5	0	103194	116259	78915	84623.5	67272.6	90366.2	122061	41463.2	107380	105904	146299	80770.5	72138.9	87348.5	87935.7	117639	86204	80490.8	125441	74829.8	68448	77731.5	78645.2	93421.7	158806	76451.2	52041.7	77051.1	85438	91026.2	PA 38:5	1.06649	0.893945	0.609418	0.919742	0.778337	0.866247	0.730228	0.473648	0.603253	0.649338	0.709821	0.843967	0.550354	0.512632
719.466	H68 C41 O8 P1	-0.27ppm	PA 38:6	0	39637.8	23878.9	30042.8	20662.3	-1.6	33982.8	74914.8	9620.9	21245.7	42079.8	42371.9	14614.3	214.3	23330.6	41818.6	22429.4	42593	24951.5	23685.7	-1.6	21057.8	15313.8	25824	26404	41175.2	20462.1	10368.4	31887.1	21667.4	1886.6	PA 38:6	0.409651	0.183611	0.232004	0.224571	-1.85118e-05	0.325758	0.448177	0.109903	0.119356	0.258007	0.205582	0.152704	0.00163491	0.136923
717.449	H66 C41 O8 P1	-1.23ppm	PA 38:7	9905.6	92856.5	114312	104306	84607.4	103792	5578.9	121415	45835.9	129143	97033	129674	51608.8	109778	66354	51410.7	201194	68322.3	5949.5	188933	245269	62477.5	376560	218592	16446.7	418741	142766	88379.4	189686	126347	119441	PA 38:7	0.959659	0.878973	0.805498	0.919567	1.20086	0.0534791	0.726364	0.523599	0.725515	0.594946	0.62916	0.539258	0.837509	0.389419
751.529	H76 C43 O8 P1	0.33ppm	PA 40:4	0	0	0	20590.9	0	0	0	18433.6	0	37965	12009.7	43939.5	0	11787.2	0	25377	37295.5	0	6655.7	0	10507.5	21206.1	0	9272.1	0	25749	7478.1	7389.2	9536.3	10950	0	PA 40:4	0	0	0.159012	0	0	0	0.110279	0	0.213284	0.073636	0.213188	0	0.0899256	0
749.514	H74 C43 O8 P1	1.84ppm	PA 40:5	0	0	0	11823	0	0	0	37524.8	0	8548.3	0	6554.2	0	0	0	0	2985.1	0	0	8457.3	0	0	8188.9	18906.8	0	48642.6	0	0	0	0	0	PA 40:5	0	0	0.0913026	0	0	0	0.224492	0	0.0480235	0	0.0317999	0	0	0
747.501	H72 C43 O8 P1	4.78ppm	PA 40:6	0	55848.7	50996.3	81447.1	60548.6	69609.9	76581	101839	54605.1	132402	154990	187720	59281.3	75232.4	104484	57520.7	160405	59897.5	86279.3	130480	92973	52974.8	126882	55109.4	73309.9	135890	77299.9	81715.4	90927.4	80613.1	87476	PA 40:6	0.577188	0.392124	0.628972	0.65808	0.805379	0.734103	0.609251	0.623773	0.743821	0.950303	0.910788	0.619428	0.573955	0.613198
745.481	H70 C43 O8 P1	0.08ppm	PA 40:7	0	15830.7	0	0	11073	0	13787.9	16497.2	6971.4	0	0	11495.7	0	0	14189.9	10525.5	0	10775.7	9601.7	25806.1	0	10878	16647.8	0	8377.5	24500.1	0	10997.8	8580.3	8330	0	PA 40:7	0.163608	0	0	0.120348	0	0.13217	0.0986944	0.0796367	0	0	0.0557753	0	0	0.0832778
###	PhosphatidicAcidOx1																																			0	0	0	0	0	0	0	0	0	0	0	0	0	0
745.539	H78 C41 O9 P1	0.58ppm	PAOx1 38:1	0	0	240900	18908.7	0	0	0	0	0	10910.9	0	9500.7	0	0	0	0	0	9794.5	0	0	10354.2	9539.2	0	0	5221	0	0	0	0	0	7821.2	PAOx1 38:1	0	1.85235	0.146022	0	0	0	0	0	0.0612964	0	0.0460959	0	0	0
705.412	H62 C39 O9 P1	-2.93ppm	PAOx1 36:7	0	11243	35489.2	6743	8698	0	3456	11249	0	27227.9	22302	0	11322	0	13130	0	1123.2	1002	0	0	10221	12901	11340	9231	0	0	0	0	21990	21509	0	PAOx1 36:7	0.116195	0.272886	0.0520725	0.0945354	0	0.0331291	0.0672971	0	0.152964	0.136742	0	0.118303	0	0.0770575
733.444	H66 C41 O9 P1	-0.90ppm	PAOx1 38:7	0	0	0	23713.6	0	4524	0	0	12353	0	0	12811	0	1349.1	0	11403.3	0	0	5570.2	6011.8	0	0	0	0	12312	19984	20911	30291	0	0	7239.2	PAOx1 38:7	0	0	0.183127	0	0.0523422	0	0	0.141113	0	0	0.062157	0	0.0102924	0
###	PhosphatidicAcidOx2																																			0	0	0	0	0	0	0	0	0	0	0	0	0	0
707.488	H72 C37 O10 P1	1.01ppm	PAOx2 34:0	0	0	0	0	0	0	9575.6	0	0	0	0	15739.4	0	0	0	0	0	0	0	0	0	0	0	0	12584.9	19451.4	0	0	0	0	0	PAOx2 34:0	0	0	0	0	0	0.0917914	0	0	0	0	0.0763651	0	0	0
733.502	H74 C39 O10 P1	-0.53ppm	PAOx2 36:1	0	30365.4	37687.5	51272.8	54976.4	31659.7	62141.2	34322.9	134343	84887.4	64834.3	76543.4	26789	40604.6	43975.6	89615.1	62398.2	41709.4	35951.5	52300	43689.6	93152.9	16423.8	37735.7	34763.8	37400.6	43496.7	56758.3	15338.7	44167.6	36892.6	PAOx2 36:1	0.313822	0.289789	0.395952	0.597518	0.366299	0.595683	0.205337	1.53465	0.476889	0.397523	0.371377	0.279917	0.309776	0.258084
761.533	H78 C41 O10 P1	-1.25ppm	PAOx2 38:1	0	152651	181567	156924	82363.1	167446	162620	149350	89905.2	224632	93914	174243	63370.7	122290	183855	202752	186000	139557	121705	184711	193831	203310	92315.3	125386	129376	165575	111338	202959	83471.8	143313	114370	PAOx2 38:1	1.57762	1.39612	1.21183	0.895174	1.93734	1.55887	0.893486	1.02702	1.26196	0.575822	0.845401	0.662158	0.932958	1.07901
731.487	H72 C39 O10 P1	-0.40ppm	PAOx2 36:2	0	0	0	0	0	0	0	0	0	22636.4	0	0	0	0	0	31140.8	0	0	0	0	0	9024.5	0	0	0	0	0	16547.3	0	0	0	PAOx2 36:2	0	0	0	0	0	0	0	0	0.127169	0	0	0	0	0
759.518	H76 C41 O10 P1	-0.51ppm	PAOx2 38:2	0	21489.6	44000.8	63913.6	12326.2	12255.4	34165.1	0	14054.5	127474	16213.6	40540.3	22432	17210.5	61410.5	229270	43020.7	53015.1	45211.6	52414.5	72477.3	147156	22789.9	27147.1	35287.2	13735.6	28348.3	148281	15762	37622.4	26291	PAOx2 38:2	0.222092	0.338334	0.49357	0.133969	0.141794	0.327505	0	0.160549	0.716136	0.0994116	0.196695	0.234391	0.1313	0.360406
																																				0	0	0	0	0	0	0	0	0	0	0	0	0	0
[truncated: 16 more columns]

## Sheet: PI and PIOx
precursorexpmz$A	sumcomposition	precursorppmdev$A	name	intensity:Exp_Sebastian_2_00.mzML	intensity:Exp_Sebastian_2_01.mzML	intensity:Exp_Sebastian_2_02.mzML	intensity:Exp_Sebastian_2_03.mzML	intensity:Exp_Sebastian_2_04.mzML	intensity:Exp_Sebastian_2_05.mzML	intensity:Exp_Sebastian_2_06.mzML	intensity:Exp_Sebastian_2_07.mzML	intensity:Exp_Sebastian_2_08.mzML	intensity:Exp_Sebastian_2_09.mzML	intensity:Exp_Sebastian_2_10.mzML	intensity:Exp_Sebastian_2_11.mzML	intensity:Exp_Sebastian_2_12.mzML	intensity:Exp_Sebastian_2_13.mzML	intensity:Exp_Sebastian_2_14.mzML	intensity:Exp_Sebastian_2_15.mzML	intensity:Exp_Sebastian_2_16.mzML	intensity:Exp_Sebastian_2_17.mzML	intensity:Exp_Sebastian_2_18.mzML	intensity:Exp_Sebastian_2_19.mzML	intensity:Exp_Sebastian_2_20.mzML	intensity:Exp_Sebastian_2_21.mzML	intensity:Exp_Sebastian_2_22.mzML	intensity:Exp_Sebastian_2_23.mzML	intensity:Exp_Sebastian_2_24.mzML	intensity:Exp_Sebastian_2_25.mzML	intensity:Exp_Sebastian_2_26.mzML	intensity:Exp_Sebastian_2_27.mzML	intensity:Exp_Sebastian_2_28.mzML	intensity:Exp_Sebastian_2_29.mzML	intensity:Exp_Sebastian_2_30.mzML
					Ctrl.	Fento 1 µM	Fento 2 µM	Fento 1 µM + Toc	Fento 1 µM + Def	Fento 1 µM + Lip-1	Ctrl.	Fento 1 µM	Fento 2 µM	Fento 1 µM + Toc	Fento 1 µM + Def	Fento 1 µM + Lip-1	Ctrl.	Fento 1 µM	Fento 2 µM	Fento 1 µM + Toc	Fento 1 µM + Def	Fento 1 µM + Lip-1	Ctrl.	Fento 1 µM	Fento 2 µM	Fento 1 µM + Toc	Fento 1 µM + Def	Fento 1 µM + Lip-1	Ctrl.	Fento 1 µM	Fento 2 µM	Fento 1 µM + Toc	Fento 1 µM + Def	Fento 1 µM + Lip-1
###	Phosphatidylinositol			0	1	2	3	4	5	6	7	8	9	10	11	12	13	14	15	16	17	18	19	20	21	22	23	24	25	26	27	28	29	30		Normalisation
809.518	H78 C41 O13 P1	-0.31ppm	PI 32:0	1.07738e+07	5.9407e+06	7.59441e+06	7.21023e+06	6.89706e+06	7124004	6.49748e+06	9.11432e+06	6.99471e+06	9.96698e+06	1.06349e+07	12664256	6.88256e+06	7.25758e+06	8.3802e+06	1.00096e+07	1.01818e+07	1.12252e+07	9.39527e+06	7.41855e+06	8.19788e+06	9.95395e+06	1.07563e+07	9983324	9.34202e+06	9.93437e+06	7.41887e+06	8.85136e+06	1.24016e+07	1.12744e+07	11562109		1	2	3	4	5	6	7	8	9	10	11	12	13	14
805.487	H74 C41 O13 P1	-0.30ppm	PI 32:2	0	54795.1	62080.2	39925.5	80171.8	87469.5	93505.4	56326.9	18610.5	52654.8	111750	174521	79311.6	38894.8	40847.3	53478.9	111174	37182.6	84307.5	82546.1	40525.3	48182.8	87910.8	17738.2	77439.8	47220.5	17004.2	56384.8	94171.1	27069.5	84695.1	PI 32:2	0.461184	0.408723	0.276867	0.581203	0.613907	0.719551	0.309002	0.133033	0.264146	0.525389	0.689028	0.576178	0.26796	0.243713
833.518	H78 C43 O13 P1	-0.14ppm	PI 34:2	0	2.28005e+06	2.60476e+06	2.20137e+06	2.10448e+06	2.52736e+06	2.99245e+06	2.98009e+06	1.57425e+06	3.39222e+06	3.09062e+06	4.25108e+06	2.27113e+06	1.56519e+06	2.10476e+06	2.62082e+06	3.07834e+06	2.38585e+06	2470378	3.10059e+06	2.34632e+06	2.35474e+06	2.22714e+06	2.0858e+06	2.43155e+06	3.01269e+06	1.7007e+06	2.39989e+06	2046568	2.45619e+06	2.65048e+06	PI 34:2	19.1901	17.1492	15.2656	15.2564	17.7384	23.0277	16.3484	11.2531	17.0173	14.5305	16.7838	16.4992	10.7831	12.558
861.549	H82 C45 O13 P1	-0.46ppm	PI 36:2	0	8721836	1.01378e+07	8.10081e+06	6852213	8.09921e+06	9.58351e+06	1.13342e+07	5.73213e+06	1.22388e+07	1.01356e+07	1.3843e+07	7297103	6.7354e+06	8.81693e+06	1.12921e+07	1.1569e+07	1.03706e+07	9.09225e+06	1.34802e+07	9.705e+06	9553332	8.73585e+06	8.92395e+06	9126062	13432422	7.31511e+06	8.47134e+06	8.08503e+06	1.05917e+07	9.79876e+06	PI 36:2	73.4074	66.7449	56.1758	49.6749	56.8445	73.7479	62.178	40.9747	61.3968	47.6524	54.6536	53.0115	46.4025	52.6057
889.582	H86 C47 O13 P1	0.34ppm	PI 38:2	0	440836	526604	435994	268526	312043	467532	541117	305178	681340	436257	559865	264689	345529	435180	625781	516866	507278	379041	745290	539142	561174	372793	397982	349955	679180	368942	445927	342021	539861	391190	PI 38:2	3.7103	3.46705	3.02344	1.94667	2.19008	3.59779	2.9685	2.18149	3.41799	2.05106	2.21042	1.9229	2.38047	2.59647
829.486	H74 C43 O13 P1	-0.86ppm	PI 34:4	0	23304.6	26498.1	38035.8	22560.5	68281.5	48889.4	39395.1	24490.2	29358	65903.8	88527	44095.3	20974.6	24960.8	41161.2	112946	40096.8	71064.7	28365.1	28670.5	14531.3	63303.9	39038.4	65157.1	55996.6	36693.1	29289.8	51628.3	61057.5	67617.9	PI 34:4	0.196143	0.174458	0.263763	0.163552	0.479235	0.376218	0.216117	0.175062	0.147276	0.309846	0.349515	0.320341	0.144501	0.148927
831.503	H76 C43 O13 P1	-0.06ppm	PI 34:3	0	160550	133634	140786	165458	191153	189685	190144	83257.5	230831	281520	365202	151427	121960	170984	241200	301030	149216	192284	243558	195538	185090	206900	126991	204627	218080	118236	177352	204296	169044	235341	PI 34:3	1.35128	0.879815	0.976296	1.19948	1.34161	1.45968	1.04311	0.595146	1.15798	1.32356	1.44186	1.10008	0.840224	1.02017
859.534	H80 C45 O13 P1	-0.24ppm	PI 36:3	16981.6	1.65899e+06	2.1369e+06	1.71309e+06	1.45074e+06	1.78596e+06	1.85742e+06	2.23339e+06	1.14799e+06	2.87796e+06	2.21196e+06	2.97579e+06	1.6075e+06	1.3682e+06	1.89859e+06	2.4204e+06	2.4743e+06	2.1123e+06	1.85697e+06	2.64685e+06	2.23995e+06	2.21931e+06	2.17202e+06	1.98835e+06	1.82787e+06	2.94762e+06	1.60967e+06	1.97795e+06	1.78563e+06	2.28467e+06	2.0156e+06	PI 36:3	13.9629	14.0689	11.8796	10.5171	12.5348	14.2934	12.2521	8.2061	14.4375	10.3995	11.7488	11.6781	9.426	11.3278
857.518	H78 C45 O13 P1	-0.27ppm	PI 36:4	62385.8	3021212	3.68614e+06	2.91461e+06	2.77784e+06	3.1666e+06	3.29049e+06	4.03357e+06	2.105e+06	4.45289e+06	4.05922e+06	5155415	2.57294e+06	2.07305e+06	2.6379e+06	3.2934e+06	3951237	2.90183e+06	2716814	3.95594e+06	2.96572e+06	2.84197e+06	2.97909e+06	2.59693e+06	2.73173e+06	4058343	2.19101e+06	2.49758e+06	2.7203e+06	3.09833e+06	2.88994e+06	PI 36:4	25.4281	24.2687	20.2116	20.1378	22.2248	25.3213	22.1277	15.0471	22.3382	19.0844	20.3542	18.6918	14.282	15.7389
855.503	H76 C45 O13 P1	-0.01ppm	PI 36:5	0	159848	153118	213877	178305	201209	149872	175914	106290	212418	240169	329576	132511	119333	137476	197344	247223	183474	181876	198203	137818	192975	206244	172490	166892	196981	129399	154425	180425	201978	165561	PI 36:5	1.34536	1.0081	1.48315	1.29261	1.41219	1.15331	0.96504	0.759789	1.06561	1.12915	1.30121	0.962656	0.822128	0.820245
795.409	H64 C41 O13 P1	-0.07ppm	PI 32:7	0	23815.9	35907.2	36625.3	27970.6	44353.2	0	24265.1	12337.1	73723.4	47205.5	88650.5	27232.9	9708.2	28696.2	12273.1	21653.7	0	0	66152.1	35335.1	0	75934	71191.5	9471.2	95748.1	0	0	39552.7	9998.8	48383.2	PI 32:7	0.200447	0.236405	0.253981	0.202772	0.311294	0	0.133115	0.0881888	0.369838	0.221936	0.350003	0.19784	0.0668832	0.171214
887.565	H84 C47 O13 P1	-0.56ppm	PI 38:3	0	3.97103e+06	4.80656e+06	4.04654e+06	2630404	3.07659e+06	5.09383e+06	5109732	2764369	6093411	3.91585e+06	5.31052e+06	3.43957e+06	3.16745e+06	4.6823e+06	6.42719e+06	5.05858e+06	4.04317e+06	4.47133e+06	6.53093e+06	5.40964e+06	5610936	3.4824e+06	3.47841e+06	4.38239e+06	6.48883e+06	4.0269e+06	4.8634e+06	3.17042e+06	4.33881e+06	4745898	PI 38:3	33.4222	31.6454	28.0611	19.069	21.5931	39.1985	28.0313	19.7604	30.568	18.4103	20.9666	24.9876	21.8217	27.9367
885.549	H82 C47 O13 P1	-0.51ppm	PI 38:4	0	6.16707e+07	6.97949e+07	55488057	4.68933e+07	5.22424e+07	5.98653e+07	8.07318e+07	4.16895e+07	8.53684e+07	6.83105e+07	8.66291e+07	4.79324e+07	4.58221e+07	5.52368e+07	6.72608e+07	7.35694e+07	5.87368e+07	5.4158e+07	8.51461e+07	61582626	5.85789e+07	56422605	5.1954e+07	5.29723e+07	8.61025e+07	45401543	5.12917e+07	5.09153e+07	60986433	5.70046e+07	PI 38:4	519.052	459.514	384.787	339.951	366.664	460.681	442.884	298.007	428.256	321.161	342.022	348.216	315.684	329.567
883.534	H80 C47 O13 P1	-0.34ppm	PI 38:5	0	1.03452e+07	1.13762e+07	9.00756e+06	6.19968e+06	7.11058e+06	1.02721e+07	1.35829e+07	6.77489e+06	13522405	9.4462e+06	1.23599e+07	7.94999e+06	7596119	9.04321e+06	1.08317e+07	10093229	1.17206e+07	9.18531e+06	1.47245e+07	1.02842e+07	9.55061e+06	7.72638e+06	9.9968e+06	9.08339e+06	1.45859e+07	7.35728e+06	8.07121e+06	7.01983e+06	1.22117e+07	9.49097e+06	PI 38:5	87.0702	74.8985	62.4638	44.9444	49.9058	79.0464	74.5138	48.4287	67.836	44.4112	48.7985	57.7546	52.3323	53.9558
881.518	H78 C47 O13 P1	-0.25ppm	PI 38:6	0	622966	669442	589101	502517	567304	632984	765432	398360	863736	817185	1.07398e+06	513975	490948	644920	759940	923585	768670	682506	957990	703032	716029	704601	602691	680976	968050	548052	591835	614403	754261	709167	PI 38:6	5.2432	4.40746	4.08517	3.64298	3.98164	4.87099	4.19906	2.84758	4.33299	3.84198	4.24021	3.73389	3.38231	3.84788
879.503	H76 C47 O13 P1	-0.35ppm	PI 38:7	0	24288.5	22514	12334.6	37315.2	30032.3	47021.8	27341.6	50068.7	51012.4	43026	53882.8	19098.7	9653.6	31885.1	40249	20153.5	27499.6	8185.7	0	0	24692.9	0	28831	29298.6	18696.8	42889.8	17169.9	0	32053.9	30012.3	PI 38:7	0.204424	0.148227	0.0855354	0.270515	0.210782	0.361846	0.149993	0.357904	0.255907	0.202286	0.212736	0.138747	0.066507	0.190241
915.598	H88 C49 O13 P1	1.72ppm	PI 40:3	77713.3	636258	964390	758042	562396	774072	245501	902080	435031	1.09412e+06	686984	1.12206e+06	433331	633668	661606	716330	879650	514755	237466	1.21789e+06	1108876	667560	1.54147e+06	1.18295e+06	271349	1.89505e+06	790026	663480	904485	736602	502304	PI 40:3	5.35507	6.34934	5.25671	4.07707	5.43284	1.8892	4.9487	3.10971	5.48871	3.22984	4.43004	3.14804	4.36556	3.94743
913.581	H86 C49 O13 P1	0.00ppm	PI 40:4	0	3.24619e+06	3.7527e+06	2.95604e+06	2.27298e+06	2.65898e+06	2.94083e+06	4.16567e+06	2.19368e+06	4.5489e+06	3.44149e+06	4.40619e+06	2.23034e+06	2.21792e+06	2807438	3598401	3.57097e+06	2.89529e+06	2.39349e+06	4.4565e+06	3.25613e+06	3.17651e+06	2.80406e+06	2719460	2.40928e+06	4.48327e+06	2.46107e+06	2.71002e+06	2.34239e+06	3.09622e+06	2.55716e+06	PI 40:4	27.3216	24.707	20.4989	16.4779	18.6621	22.6305	22.8524	15.681	22.8199	16.1801	17.3962	16.2028	15.28	16.7504
911.565	H84 C49 O13 P1	-0.57ppm	PI 40:5	0	4.37746e+06	4.98046e+06	3.97149e+06	3.10877e+06	3.527e+06	4.1681e+06	5.82773e+06	3.01719e+06	6.07518e+06	4.75515e+06	6.36756e+06	3224853	3.48279e+06	4.48304e+06	5.4266e+06	5.60224e+06	4.80041e+06	4.03766e+06	6.9457e+06	4.93713e+06	4.67955e+06	4.13043e+06	4.10849e+06	3931072	6.75369e+06	3.62114e+06	3.98783e+06	3.74166e+06	4.90789e+06	4.29579e+06	PI 40:5	36.843	32.7903	27.5407	22.5369	24.7543	32.0747	31.9702	21.5677	30.4766	22.3563	25.1399	23.4277	23.9942	26.7478
909.55	H82 C49 O13 P1	-0.30ppm	PI 40:6	0	2.8445e+06	3.02468e+06	2.4898e+06	2.14258e+06	2.45394e+06	2.83595e+06	3.63153e+06	1.83222e+06	3.67001e+06	3.19225e+06	4269844	2.19661e+06	2.33806e+06	2.93067e+06	3.57229e+06	3.90196e+06	3.21812e+06	2841994	4.58818e+06	3.26791e+06	2.98656e+06	2.98608e+06	2.73089e+06	2.73409e+06	4.65396e+06	2.41681e+06	2.64293e+06	2.6222e+06	3.15767e+06	2979319	PI 40:6	23.9408	19.9138	17.2658	15.5326	17.223	21.8234	19.9221	13.0972	18.4108	15.0083	16.8579	15.9578	16.1077	17.4857
907.534	H80 C49 O13 P1	-0.42ppm	PI 40:7	0	503057	485404	379951	365430	381785	493228	594407	315222	573313	492359	724751	373592	391922	463529	531611	635229	577008	533763	764914	505858	516417	498000	477459	479237	796992	373685	400700	417180	576780	494023	PI 40:7	4.23399	3.1958	2.6348	2.64917	2.67956	3.79553	3.26084	2.25329	2.87606	2.31482	2.8614	2.71405	2.70008	2.76562
905.518	H78 C49 O13 P1	-0.28ppm	PI 40:8	0	20647	0	56158.4	29756.8	57202	81028.1	39034.5	13223.1	13289.6	90119.2	150969	40118	19347.7	11034.1	29493.9	61854.9	36528.4	84211	25414.3	35666.3	29849.9	15708.4	12319	67975.7	30982.3	10028.4	0	14563	60118.6	64665.2	PI 40:8	0.173776	0	0.389435	0.215721	0.401474	0.623535	0.214138	0.0945222	0.0666681	0.423694	0.596045	0.291447	0.133293	0.0658343
941.612	H90 C51 O13 P1	-0.77ppm	PI 42:4	0	18664.4	12172.4	23263.2	85727.1	41599.5	36828.1	69928	39700.2	72364	74262.5	113958	31981.8	28510.8	32091.9	71008.7	63033.9	47987.9	35527.2	49338.6	43717.9	56975.3	77940.3	14367.7	28937	90270	49157.2	47068.6	46324	51679.7	8748.6	PI 42:4	0.157089	0.0801405	0.161321	0.621476	0.291967	0.283403	0.383616	0.283787	0.363019	0.349144	0.449918	0.232339	0.196421	0.191475
939.597	H88 C51 O13 P1	-0.22ppm	PI 42:5	0	67257.9	109389	79414.2	85611.4	101803	68229	95127.3	29755.7	111292	122126	135079	44677.8	50928.3	81109.6	88685.9	125891	84117.4	77698.6	124759	77197.7	77846	92031	51529.2	66245.6	102323	66798.8	79254.2	124242	73632	78030.9	PI 42:5	0.566077	0.720191	0.550705	0.620637	0.71451	0.525042	0.521856	0.212702	0.558303	0.574175	0.533309	0.324572	0.350863	0.483936
937.581	H86 C51 O13 P1	-0.07ppm	PI 42:6	0	86487.8	73347.5	41860	21773.9	45765.1	72873.8	88779.8	32284.4	83467.5	65621.6	102120	31223.8	37786.8	74804.8	87129	101080	69697.8	47954.8	174154	69393.9	65972.5	61579.7	63613.2	56760.5	109424	28232.5	55312.6	48539.8	100236	35569.3	PI 42:6	0.727926	0.482904	0.290282	0.157849	0.321203	0.560785	0.487035	0.230777	0.41872	0.308519	0.403181	0.226833	0.260326	0.446319
935.565	H84 C51 O13 P1	-0.64ppm	PI 42:7	5011.7	28010.4	23427	22720	0	21883	18744.2	25937.8	18901.1	31432.4	35779.8	80625.3	0	0	10671	29170.8	40169.4	25539.4	27147.6	0	17144.2	17201.2	0	27202.4	15062.8	67557.8	0	17114.6	15675.7	15896.2	0	PI 42:7	0.23575	0.154238	0.157554	0	0.153586	0.144242	0.142292	0.13511	0.157683	0.168218	0.318318	0	0	0.0636679
933.549	H82 C51 O13 P1	-0.37ppm	PI 42:8	0	27112.3	43956.7	17589.5	57969	69621.1	28883.8	38659.6	27733.7	47613.9	59303.7	100822	13179.3	8898	40457.2	21797.2	26596.3	33284.8	8680.3	33614	16099.9	0	0	19163.7	11877.6	0	19119.7	15312.4	16707.2	47193.8	0	PI 42:8	0.228191	0.289401	0.121976	0.420244	0.488637	0.222269	0.212082	0.198248	0.238858	0.278816	0.398058	0.0957441	0.0613014	0.241386
891.596	H88 C47 O13 P1	-1.13ppm	PI 38:1	0	179644	235140	182262	109591	169503	188208	191654	98868.8	187479	175742	187999	64764.2	200231	150974	190369	263565	165191	120816	267920	213414	195411	206482	94284	117605	228299	145393	132308	176573	148051	89993.6	PI 38:1	1.51197	1.54811	1.26391	0.794475	1.18966	1.44831	1.05139	0.70674	0.9405	0.82625	0.742241	0.470495	1.37946	0.900777
863.565	H84 C45 O13 P1	-0.45ppm	PI 36:1	0	1.06818e+07	1.22208e+07	1.00466e+07	9.93063e+06	1.15879e+07	1.09524e+07	13888716	7.13289e+06	1.54017e+07	1.47099e+07	1.94152e+07	8.18879e+06	8.17556e+06	1.03906e+07	1.3433e+07	1.68661e+07	1.08736e+07	1.01148e+07	1.6298e+07	1.17197e+07	1.14757e+07	12514620	9.77534e+06	9.87994e+06	1.601e+07	8.51498e+06	1.03063e+07	1.14769e+07	1.12457e+07	1.06531e+07	PI 36:1	89.9038	80.4591	69.669	71.9918	81.3299	84.2819	76.1917	50.9877	77.2638	69.1586	76.6534	59.4894	56.3242	61.995
807.503	H76 C41 O13 P1	-0.54ppm	PI 32:1	0	921194	1.05522e+06	924467	1.25199e+06	1420216	1.1086e+06	1.20726e+06	613468	1.35779e+06	1.71819e+06	2.23867e+06	822589	555520	783068	999075	1.67713e+06	855569	866238	1.17584e+06	863754	892765	1.21626e+06	735731	855654	1.1283e+06	682394	823652	1.1541e+06	798976	870648	PI 32:1	7.75324	6.94734	6.4108	9.07629	9.96782	8.53096	6.62287	4.38523	6.81144	8.07806	8.83855	5.97589	3.82717	4.67213
835.534	H80 C43 O13 P1	-0.58ppm	PI 34:1	0	1.24984e+07	1.40084e+07	1.15179e+07	1.21997e+07	1.42007e+07	1.24759e+07	1.63091e+07	8.00404e+06	1.76799e+07	18317563	2.34809e+07	9.39209e+06	9.25819e+06	1.12818e+07	1.471e+07	1.94456e+07	1.13425e+07	1.12257e+07	1.75743e+07	1.27581e+07	1.30119e+07	1.46876e+07	9954083	1.10856e+07	1.80757e+07	9.46306e+06	1.15532e+07	1.3459e+07	1.15039e+07	1.19082e+07	PI 34:1	105.193	92.2282	79.8721	88.441	99.6683	96.006	89.4698	57.215	88.6922	86.1198	92.7055	68.231	63.7829	67.3121
893.611	H90 C47 O13 P1	-2.08ppm	PI 38:0	0	275351	321553	228793	138028	177161	309410	249180	108430	284061	183656	202573	114346	280386	234078	234923	274724	197479	160687	376202	264273	189588	187354	133154	170505	328281	172632	188468	141970	193343	158937	PI 38:0	2.3175	2.11704	1.58658	1.00063	1.24341	2.381	1.36697	0.775087	1.42501	0.863455	0.799784	0.830695	1.93168	1.39662
837.548	H82 C43 O13 P1	-1.81ppm	PI 34:0	0	5.01976e+06	5827753	4763362	5.52069e+06	6.04969e+06	4072230	7.2224e+06	3.17279e+06	7421672	8322360	1.01293e+07	3.30334e+06	4.66951e+06	5.43615e+06	6.7489e+06	1.05992e+07	4.24158e+06	4.60507e+06	8.07521e+06	6.24037e+06	5.8134e+06	8274662	3.55842e+06	4.57334e+06	8.66172e+06	4.42338e+06	5.17363e+06	7.64028e+06	4.08671e+06	5.02007e+06	PI 34:0	42.2489	38.3687	33.032	40.0221	42.4599	31.337	39.6212	22.68	37.2313	39.1275	39.9917	23.9979	32.1699	32.4345
###	PhosphatidylinositolOx1																																			0	0	0	0	0	0	0	0	0	0	0	0	0	0
903.56	H84 C47 O14 P1	-0.56ppm	PIOx1 38:3	0	0	0	0	0	0	0	0	0	15600.8	0	0	0	0	0	36187.7	0	10235.3	0	0	12637.4	21619.7	0	26851.5	0	0	0	11916.1	0	0	0	PIOx1 38:3	0	0	0	0	0	0	0	0	0.0782624	0	0	0	0	0
901.544	H82 C47 O14 P1	-0.29ppm	PIOx1 38:4	0	43453.1	365942	369840	37835.5	58654.9	69895.5	63126.4	163205	637023	115701	162805	55232.3	12697.4	271862	564222	72687.9	252407	78351.6	64816.6	389992	448466	78155.8	206284	69076.5	97340.1	231684	564267	44435.3	271776	62863.3	PIOx1 38:4	0.365724	2.40928	2.56469	0.274287	0.411671	0.537866	0.346303	1.16663	3.19567	0.543965	0.642773	0.401248	0.0874768	1.62205
899.529	H80 C47 O14 P1	-0.64ppm	PIOx1 38:5	0	17658.9	249227	290499	0	11859.6	9122.8	0	99152.9	411969	0	23710.2	15519.8	0	196301	381956	0	51278.3	17455	0	238010	322444	0	24661.1	21193.6	0	166715	311579	0	50289.4	16837	PIOx1 38:5	0.148626	1.64086	2.01449	0	0.0832369	0.0702026	0	0.708771	2.06667	0	0.0936107	0.112747	0	1.17122
927.561	H84 C49 O14 P1	0.76ppm	PIOx1 40:5	0	0	27744	17479.4	0	11978.4	0	0	0	77728.9	0	26351.7	0	0	19395.1	57381.4	0	24649.8	0	0	11126.6	59222.1	14075.4	20416.5	0	0	9052.4	45996	0	16456.5	0	PIOx1 40:5	0	0.182661	0.121212	0	0.0840707	0	0	0	0.389932	0	0.10404	0	0	0.11572
925.544	H82 C49 O14 P1	-0.56ppm	PIOx1 40:6	5218.7	0	0	0	0	0	0	0	0	30781.3	0	0	0	0	0	31846.6	0	0	0	0	15224	21748.8	0	0	0	0	0	28692.7	0	0	0	PIOx1 40:6	0	0	0	0	0	0	0	0	0.154416	0	0	0	0	0
851.529	H80 C43 O14 P1	-0.48ppm	PIOx1 34:1	0	12345	42389.7	50332	12900	12090	20902	11000	42192.6	54092.6	40092.6	7829	11022	13090	23412	71049.6	23422	11232.3	21204.3	10902.4	100306	146389	23000.1	12321.1	19021.4	21091.3	66087.7	90503.6	34900	34000.3	37652.5	PIOx1 34:1	0.103902	0.279085	0.349032	0.0935181	0.084854	0.160847	0.0603446	0.301604	0.271359	0.188495	0.0309098	0.0800719	0.0901815	0.139686
																																				0	0	0	0	0	0	0	0	0	0	0	0	0	0
###	PhosphatidylinositolOx2																																			0	0	0	0	0	0	0	0	0	0	0	0	0	0
919.557	H84 C47 O15 P1	2.28ppm	PIOx2 38:3	0	0	0	18520.5	10085.2	17676	0	0	6596.7	71506.8	12422.7	25964.2	0	15963.1	49048.9	29133.5	0	0	7005.5	51988.8	27768.3	19644.6	80104.5	74742.3	0	102568	24599.3	44271	21953.4	54715.8	0	PIOx2 38:3	0	0	0.128432	0.0731123	0.124059	0	0	0.0471549	0.358718	0.0584052	0.10251	0	0.109975	0.292647
917.538	H82 C47 O15 P1	-1.42ppm	PIOx2 38:4	0	18646.5	199847	277272	13477.4	68607.5	81909.2	34084.8	67590.5	379731	43732.2	66918.7	31142.3	42125.1	171231	395518	33297.5	81144.2	73483.6	0	244896	366913	40337.8	94687.6	50024.7	57581.7	140013	342214	21727.8	90512.2	78524.3	PIOx2 38:4	0.156938	1.31575	1.92277	0.097704	0.481523	0.630315	0.186985	0.483155	1.90495	0.205606	0.264203	0.226241	0.290214	1.02164
915.523	H80 C47 O15 P1	-0.69ppm	PIOx2 38:5	0	12643.2	21845.4	70319.6	0	0	0	0	0	94565.5	0	0	0	0	23399.2	141679	0	8587.2	0	0	62636.2	77642.6	0	0	0	0	18209.6	88979.7	0	0	0	PIOx2 38:5	0.106412	0.143825	0.487638	0	0	0	0	0	0.474394	0	0	0	0	0.13961
																																				0	0	0	0	0	0	0	0	0	0	0	0	0	0
																																				0	0	0	0	0	0	0	0	0	0	0	0	0	0
###	PhosphatidylinositolOx3																																			0	0	0	0	0	0	0	0	0	0	0	0	0	0
935.551	H84 C47 O16 P1	1.23ppm	PIOx3 38:3	0	17351.9	75137.6	85851.2	15332.1	25008.4	8638.2	0	27260	183649	0	10659.9	0	9655.6	49954.5	157293	0	54040.2	0	0	72059.9	135554	0	47170.7	0	0	41528.2	132590	0	72922.3	15729.7	PIOx3 38:3	0.146042	0.49469	0.595343	0.11115	0.175522	0.0664734	0	0.194862	0.921288	0	0.0420866	0	0.0665208	0.298051
933.535	H82 C47 O16 P1	0.49ppm	PIOx3 38:4	0	15325.8	302982	301391	40880.4	35597.4	54764.4	0	169881	547602	43527.3	13224.9	40696.6	16748.1	265607	503793	0	45323.1	27403.7	0	321774	425321	0	81836.3	25958.1	0	199093	484268	11325	98414.5	38328.7	PIOx3 38:4	0.12899	1.99477	2.09002	0.296361	0.249841	0.421428	0	1.21435	2.74708	0.204643	0.0522135	0.29565	0.115383	1.58473
931.519	H80 C47 O16 P1	0.38ppm	PIOx3 38:5	0	0	101087	149346	0	0	0	0	47882.1	218931	0	0	0	0	80547.9	242285	0	0	0	0	123592	165055	0	0	0	0	67469	212663	0	0	0	PIOx3 38:5	0	0.665534	1.03565	0	0	0	0	0.342274	1.09828	0	0	0	0	0.480585
959.551	H84 C49 O16 P1	0.70ppm	PIOx3 40:5	0	0	15292.6	15136.3	0	0	0	0	0	28783.1	0	0	0	0	9468.2	35808.4	0	0	0	0	0	21560.8	0	0	0	0	0	32622.5	0	0	0	PIOx3 40:5	0	0.100683	0.104964	0	0	0	0	0	0.144392	0	0	0	0	0.0564915
																																				0	0	0	0	0	0	0	0	0	0	0	0	0	0
																																				0	0	0	0	0	0	0	0	0	0	0	0	0	0
###	PhosphatidylinositolOx4																																			0	0	0	0	0	0	0	0	0	0	0	0	0	0
951.547	H84 C47 O17 P1	1.44ppm	PIOx4 38:3	0	11142	3269	-1.8	0	21947.1	19538.8	0	0	-1.8	0	0	0	7837	-1.8	20279.2	0	0	0	0	-1.8	-1.8	0	22038	0	15024.5	7505.3	8396.6	0	8801.1	10132	PIOx4 38:3	0.0937768	0.0215224	-1.24823e-05	0	0.154036	0.150357	0	0	-9.02981e-06	0	0	0	0.0539918	-1.07396e-05
949.53	H82 C47 O17 P1	0.85ppm	PIOx4 38:4	0	17127	172275	145845	20028.3	22421.3	17204.1	23237.8	45084.5	257612	24907.5	17987.7	8891.3	9346.9	116791	276630	0	14897.8	20781.7	19172.8	141837	221081	0	18359.4	0	0	65579.3	233461	13073.5	0	0	PIOx4 38:4	0.14415	1.13422	1.01138	0.145195	0.157364	0.132391	0.12748	0.322276	1.29233	0.117102	0.0710176	0.0645929	0.064394	0.696825
947.513	H80 C47 O17 P1	-1.04ppm	PIOx4 38:5	0	9996.1	42033.4	108628	10611.7	9564.1	7469.1	0	10181.7	131287	0	0	10117.9	0	28818.8	141687	0	0	8407.1	0	50421.1	109162	0	28777.6	22384.9	21066.8	27335.2	116170	0	0	0	PIOx4 38:5	0.0841323	0.276739	0.753293	0.0769292	0.0671259	0.0574769	0	0.0727814	0.658609	0	0	0.0735039	0	0.171946
																																				0	0	0	0	0	0	0	0	0	0	0	0	0	0
																																				0	0	0	0	0	0	0	0	0	0	0	0	0	0
###	PhosphatidylinositolOx5																																			0	0	0	0	0	0	0	0	0	0	0	0	0	0
965.525	H82 C47 O18 P1	0.29ppm	PIOx5 38:4	0	0	99424.3	97377.5	0	0	0	0	29834.5	200531	0	0	0	0	66526.5	218541	0	0	0	0	79944.5	188001	0	0	0	0	78194.1	242016	0	0	0	PIOx5 38:4	0	0.654588	0.675273	0	0	0	0	0.213265	1.00598	0	0	0	0	0.396927
963.509	H80 C47 O18 P1	0.28ppm	PIOx5 38:5	0	0	26646.7	18539.5	0	0	0	0	0	63025.4	0	0	0	0	0	83710.7	0	0	0	0	32207.5	56950.1	0	0	0	0	0	77255.8	0	0	0	PIOx5 38:5	0	0.175436	0.128564	0	0	0	0	0	0.316171	0	0	0	0	0
																																				0	0	0	0	0	0	0	0	0	0	0	0	0	0
																																				0	0	0	0	0	0	0	0	0	0	0	0	0	0
###	PhosphatidylinositolOx6																																			0	0	0	0	0	0	0	0	0	0	0	0	0	0
981.517	H82 C47 O19 P1	-2.12ppm	PIOx6 38:4	0	161030	0	39808.5	0	0	0	0	0	47021.2	0	0	0	0	0	61751.4	0	0	0	0	0	37687.7	0	0	0	0	70521.8	45870.5	0	0	0	PIOx6 38:4	1.35531	0	0.276056	0	0	0	0	0	0.235885	0	0	0	0	0
[truncated: 16 more columns]
