# Supplementary material for: Activation of lysosomal iron triggers ferroptosis in cancer
Source: Research Square preprint supplement (doi:10.21203/rs.3.rs-4165774/v1), 2024-04-08
Supplement: Supplementary file 3 [file 8ccda42856fb1d950965d6c5.xlsx]

## Sheet: Title
	Supplementary Table 4
	Quantitative mass spectrometry-based lipidomics of oxidised phospholipids and lysophospholipids
	of dissociated human tumors treated with fentomycin and tocopherol

## Sheet: PC and PCOx
precursorexpmz$A	sumcomposition	precursorppmdev$A	name	intensity:E8_Sebastian_10_00.mzML	intensity:E8_Sebastian_10_01.mzML	intensity:E8_Sebastian_10_02.mzML	intensity:E8_Sebastian_10_03.mzML	intensity:E8_Sebastian_10_04.mzML	intensity:E8_Sebastian_10_05.mzML	intensity:E8_Sebastian_10_06.mzML	intensity:E8_Sebastian_10_07.mzML	intensity:E8_Sebastian_10_08.mzML	intensity:E8_Sebastian_10_09.mzML	intensity:E8_Sebastian_10_10.mzML	intensity:E8_Sebastian_10_11.mzML	intensity:E8_Sebastian_10_12.mzML	intensity:E8_Sebastian_10_13.mzML	intensity:E8_Sebastian_10_14.mzML	intensity:E8_Sebastian_10_15.mzML	intensity:E8_Sebastian_10_16.mzML	intensity:E8_Sebastian_10_17.mzML	intensity:E8_Sebastian_10_18.mzML	intensity:E8_Sebastian_10_19.mzML	intensity:E8_Sebastian_10_20.mzML	intensity:E8_Sebastian_10_21.mzML	intensity:E8_Sebastian_10_22.mzML	intensity:E8_Sebastian_10_23.mzML	intensity:E8_Sebastian_10_24.mzML	intensity:E8_Sebastian_10_25.mzML	intensity:E8_Sebastian_10_26.mzML	intensity:E8_Sebastian_10_27.mzML	intensity:E8_Sebastian_10_28.mzML	intensity:E8_Sebastian_10_29.mzML	intensity:E8_Sebastian_10_30.mzML			name	intensity:E8_Sebastian_10_01.mzML	intensity:E8_Sebastian_10_02.mzML	intensity:E8_Sebastian_10_03.mzML	intensity:E8_Sebastian_10_04.mzML	intensity:E8_Sebastian_10_05.mzML	intensity:E8_Sebastian_10_06.mzML	intensity:E8_Sebastian_10_07.mzML	intensity:E8_Sebastian_10_08.mzML	intensity:E8_Sebastian_10_09.mzML	intensity:E8_Sebastian_10_10.mzML	intensity:E8_Sebastian_10_11.mzML	intensity:E8_Sebastian_10_12.mzML
				raw intensity	Lipo 1	Lipo 1 + Fento	Lipo 1 + Fento + Toc	PDAC 1	PDAC1 + Fento	PDAC1 + Fento + Toc	PDAC 2	PDAC2 + Fento	PDAC2 + Fento + Toc	PDAC 3	PDAC3 + Fento	PDAC3 + Fento + Toc	Angio breast	Angio breast + Fento	Angio breast + Fento + Toc	Lipo 2	Lipo 2 + Fento	Lipo 2 + Fento + Toc	Lipo 3	Lipo 3 + Fento	Lipo 3 + Fento + Toc	Lipo 4	Lipo 4 + Fento	Lipo 4 + Fento + Toc	Lipo 5	Lipo 5 + Fento	Lipo 5 + Fento + Toc	UPS	UPS + Fento	UPS + Fento + Toc			nmol	Lipo 1	Lipo 1 + Fento	Lipo 1 + Fento + Toc	PDAC 1	PDAC1 + Fento	PDAC1 + Fento + Toc	PDAC 2	PDAC2 + Fento	PDAC2 + Fento + Toc	PDAC 3	PDAC3 + Fento	PDAC3 + Fento + Toc
###	Phosphatidylcholine			0	1	2	3	4	5	6	7	8	9	10	11	12	13	14	15	16	17	18	19	20	21	22	23	24	25	26	27	28	29	30			total PC nmol	2667.51	2292.99	2287.29	4181.65	3312.04	3302.3	1007.55	948.236	982.365	1070.08	827.872	899.844
762.6	H85 C42 N1 O8 P1	-0.48ppm	PC 34:0	3.33148e+08	1.01266e+08	9.84195e+07	9.69582e+07	8.12261e+07	8.78757e+07	9.48014e+07	1.51278e+08	1.52715e+08	1.4578e+08	3.42606e+07	3.80427e+07	33668415	90069901	6.56902e+07	7.54294e+07	6.12881e+07	5.28165e+07	6.40876e+07	1.76747e+08	3.34592e+07	3.83176e+07	4.28355e+07	42424074	4.15804e+07	1.13878e+08	1.07754e+08	1.08472e+08	8.73061e+07	8.01345e+07	8.6942e+07				1	2	3	4	5	6	7	8	9	10	11	12
678.507	H73 C36 N1 O8 P1	-0.07ppm	PC 28:0	0	38523.9	0	21549.7	275777	170174	234523	41831.3	24061.9	45973.2	306928	345549	279858	2.66429e+06	2.1342e+06	2.77968e+06	75364.3	76249.1	70238.8	652334	3.82518e+06	4.54578e+06	129478	131394	99067.4	0	15337.1	0	134232	110348	81570.7			PC 28:0	0.114127	0	0.0666773	1.01855	0.580959	0.74215	0.082956	0.0472682	0.0946078	2.68759	2.72496	2.49366
706.538	H77 C38 N1 O8 P1	-0.05ppm	PC 30:0	0	7.55536e+06	6397422	6.07504e+06	6.06448e+06	5.08404e+06	5.43132e+06	4.2582e+06	4.22634e+06	4242811	2.16676e+06	2.55737e+06	2.39425e+06	5.49462e+07	4.7391e+07	5.70253e+07	5.27848e+06	4.16966e+06	4.06485e+06	8.28366e+06	5.25792e+07	6.32458e+07	1.42003e+07	1.333e+07	1.46614e+07	2.47095e+06	2.70389e+06	2645331	7149481	6.46327e+06	6.83021e+06			PC 30:0	22.3828	19.5005	18.7969	22.3985	17.3565	17.1875	8.44448	8.30239	8.73124	18.9731	20.1671	21.3338
734.569	H81 C40 N1 O8 P1	-0.09ppm	PC 32:0	0	1.01628e+08	8.35802e+07	8.57008e+07	4.5328e+07	3.65698e+07	3.97908e+07	4.02765e+07	40457171	3.82281e+07	2.0023e+07	23292626	22541874	1.90727e+08	1.61405e+08	1.95159e+08	3.45137e+07	2.77511e+07	28571267	1.67162e+07	9.89496e+07	1.18237e+08	2.1141e+08	200528673	2.07771e+08	2.05584e+07	2.2942e+07	2.20153e+07	9.86744e+07	8.94251e+07	9.64282e+07			PC 32:0	301.073	254.767	265.168	167.414	124.846	125.919	79.8726	79.4757	78.6692	175.33	183.683	200.858
844.679	H95 C48 N1 O8 P1	-0.01ppm	PC 40:1	0	193056	166989	73652.6	469190	379823	443530	25501.8	0	25376.7	60778.1	57632.2	58774.9	2.38269e+06	2.01249e+06	2.16384e+06	333449	260823	287288	256001	2.2013e+06	2.63641e+06	0	35842.3	32641.1	0	0	0	410905	448502	383550			PC 40:1	0.571927	0.509012	0.22789	1.73291	1.29668	1.40356	0.0505728	0	0.0522224	0.532199	0.454481	0.52371
704.522	H75 C38 N1 O8 P1	-0.08ppm	PC 30:1	0	345825	208151	313187	943358	805172	946364	317388	218000	320912	53979.9	42230.2	48315.6	5.1526e+06	4.32843e+06	5.25739e+06	264198	304111	215289	593636	3.47198e+06	3957966	787806	708332	769876	0	31017.5	0	552278	529650	543201			PC 30:1	1.02451	0.634482	0.969035	3.48419	2.74879	2.99478	0.629415	0.428247	0.660401	0.472671	0.333022	0.430513
732.554	H79 C40 N1 O8 P1	0.09ppm	PC 32:1	28895.7	2.05772e+07	1.68475e+07	1.67719e+07	2.75189e+07	23661809	2.58823e+07	1.31268e+07	1.21319e+07	1.19405e+07	2.15897e+06	2.31172e+06	2257007	100346521	8.40149e+07	1.02662e+08	1.45683e+07	11680256	1.1604e+07	1.05752e+07	6.37341e+07	7.46522e+07	5.91191e+07	5.60331e+07	5.75218e+07	7.1251e+06	7.54967e+06	7.73911e+06	2.80267e+07	2.62773e+07	2.79547e+07			PC 32:1	60.9601	51.3541	51.8943	101.638	80.7794	81.9047	26.0318	23.8323	24.5723	18.9048	18.2299	20.1109
760.585	H83 C42 N1 O8 P1	-0.18ppm	PC 34:1	0	2.22715e+08	1.86042e+08	1.86581e+08	2.92899e+08	256788737	2.70724e+08	1.25045e+08	1.21003e+08	1.15388e+08	2.67339e+07	2.94312e+07	2.84341e+07	5.01191e+08	4.29573e+08	5.22412e+08	1.32476e+08	1.07443e+08	1.04967e+08	6.82498e+07	4.05991e+08	4.76482e+08	5.35713e+08	5.10168e+08	5.22079e+08	9.00997e+07	9.64687e+07	9.62434e+07	2.37607e+08	222517712	232811407			PC 34:1	659.793	567.089	577.303	1081.79	876.654	856.708	247.977	237.704	237.455	234.094	232.091	253.36
788.616	H87 C44 N1 O8 P1	-0.38ppm	PC 36:1	0	5.84212e+07	4.94078e+07	4.9643e+07	1.4639e+08	1.27414e+08	1.35435e+08	3.42576e+07	3.25939e+07	3.03877e+07	4.16759e+06	4.48809e+06	4.42282e+06	7.34452e+07	6.12157e+07	7.51336e+07	4.66184e+07	3.67121e+07	3.7033e+07	1.48423e+07	7.60508e+07	9.17389e+07	1.02293e+08	9.66922e+07	99469776	3.76254e+07	4.37935e+07	4.07562e+07	6.49536e+07	59605144	6.14113e+07			PC 36:1	173.073	150.604	153.601	540.676	434.98	428.586	67.9365	64.0288	62.5344	36.4932	35.3925	39.4093
816.648	H91 C46 N1 O8 P1	0.07ppm	PC 38:1	0	1.83243e+06	1.54392e+06	1.62385e+06	2.71763e+06	2181666	2.16698e+06	659194	588658	610386	161003	162293	131874	2.75823e+06	2.24145e+06	2.89766e+06	1.46107e+06	1.12154e+06	1.11765e+06	1.08198e+06	6.89624e+06	8.15934e+06	2344352	2.10615e+06	1.89138e+06	495652	653391	640399	1.51997e+06	1.5785e+06	1.54034e+06			PC 38:1	5.42857	4.70615	5.02437	10.0373	7.44802	6.85743	1.30725	1.15638	1.25611	1.40981	1.27982	1.17506
872.71	H99 C50 N1 O8 P1	-0.07ppm	PC 42:1	0	0	0	0	639645	633048	655885	0	0	0	174990	156317	190171	4.09126e+06	3.44308e+06	4.23744e+06	84698.7	0	120613	263302	2.24166e+06	2.61173e+06	0	0	0	0	0	0	195402	164953	130281			PC 42:1	0	0	0	2.36246	2.16117	2.07556	0	0	0	1.53229	1.2327	1.69451
758.569	H81 C42 N1 O8 P1	0.07ppm	PC 34:2	0	9.0247e+07	7.57215e+07	7.2017e+07	8.53115e+07	7.40087e+07	7.84565e+07	3.40886e+07	3.31214e+07	3.20056e+07	1.06419e+07	1.2565e+07	11914440	1.57571e+08	1.37649e+08	1.63699e+08	7.8556e+07	64811585	6.18515e+07	12657929	6.85852e+07	8.00181e+07	248416333	2.39169e+08	2.42888e+08	4.4929e+07	4.73324e+07	4.67741e+07	1.07963e+08	1.01792e+08	1.0804e+08			PC 34:2	267.357	230.812	222.829	315.089	252.659	248.276	67.6015	65.0651	65.8641	93.1852	99.0857	106.163
786.601	H85 C44 N1 O8 P1	-0.27ppm	PC 36:2	0	1.30589e+08	1.10475e+08	1.07121e+08	1.90748e+08	1.67059e+08	1.77338e+08	4.99942e+07	4.7631e+07	4.68587e+07	6056869	6.48363e+06	6.17327e+06	1.57985e+08	134361411	1.61693e+08	9.12829e+07	7.43479e+07	7.1959e+07	1.28979e+07	6.80757e+07	7.96796e+07	2.28884e+08	2.2238e+08	2.21389e+08	5.1421e+07	5.59513e+07	5.33518e+07	1.21607e+08	1.14598e+08	1.20225e+08			PC 36:2	386.871	336.748	331.445	704.507	570.325	561.188	99.1439	93.5682	96.43	53.0365	51.1291	55.0065
814.632	H89 C46 N1 O8 P1	-0.12ppm	PC 38:2	0	5.74183e+06	4.74245e+06	4.8154e+06	1.81181e+07	1.59836e+07	1.72925e+07	3.01029e+06	2.71942e+06	2.74325e+06	504405	421481	368554	1.01712e+07	8.82206e+06	1.08794e+07	3.68302e+06	3.02523e+06	3.04181e+06	1.96888e+06	11653668	1.32355e+07	1.59313e+07	15174242	1.50906e+07	2.03019e+06	2.10156e+06	2.09114e+06	8.36335e+06	7890836	8.37674e+06			PC 38:2	17.0102	14.4558	14.8994	66.9174	54.5667	54.7224	5.96972	5.34214	5.6453	4.41679	3.32375	3.28397
842.663	H93 C48 N1 O8 P1	-0.12ppm	PC 40:2	0	422227	320676	303383	1.34721e+06	1.20368e+06	1.33092e+06	167224	148328	133925	47696.9	21987.4	19466.7	2.0517e+06	1.52406e+06	2.11579e+06	407063	451525	370472	281823	2.20986e+06	2.39215e+06	584380	664231	506276	0	0	0	850035	758227	803925			PC 40:2	1.25085	0.977479	0.938703	4.97576	4.10925	4.2117	0.331624	0.291382	0.275602	0.417654	0.17339	0.173457
702.507	H73 C38 N1 O8 P1	0.51ppm	PC 30:2	0	0	0	0	45157.7	0	23689.1	0	0	0	47615.9	64942.1	61918.5	172988	94513.4	138897	0	0	0	0	0	0	0	23046.1	0	0	0	0	0	0	0			PC 30:2	0	0	0	0.166785	0	0.0749644	0	0	0	0.416945	0.512126	0.55172
730.538	H77 C40 N1 O8 P1	0.17ppm	PC 32:2	0	1.63818e+06	1.48997e+06	1401030	3.03077e+06	2.67191e+06	2941342	1.00271e+06	820428	779128	176298	189958	197066	8.72913e+06	7.67043e+06	8.98263e+06	1.46157e+06	1.02354e+06	1.27613e+06	755335	4.20361e+06	5.12398e+06	2.64179e+06	2.56919e+06	2.60229e+06	424335	417356	497594	2.46396e+06	2.29884e+06	2.38638e+06			PC 32:2	4.8531	4.54169	4.33495	11.1938	9.12168	9.30791	1.98848	1.61168	1.60336	1.54374	1.49798	1.75594
780.554	H79 C44 N1 O8 P1	-0.20ppm	PC 36:5	0	2.85085e+06	2.41733e+06	2.26664e+06	4.45478e+06	3.83155e+06	4.20502e+06	2.61873e+06	2.44275e+06	2.58376e+06	2.89881e+06	524428	416114	1.00158e+07	8.71165e+06	1.10552e+07	3.69405e+06	3.03971e+06	3.15051e+06	177049	790672	1.00931e+06	3.25121e+06	3537276	3.34235e+06	1.83522e+06	1.91811e+06	1.89919e+06	4.19953e+06	4.16298e+06	4.61961e+06			PC 36:5	8.44565	7.36844	7.01324	16.4533	13.0806	13.3068	5.19323	4.79863	5.31709	25.3832	4.13558	3.70776
754.538	H77 C42 N1 O8 P1	-0.20ppm	PC 34:4	11936.5	547232	585774	629132	1.3219e+06	1.19421e+06	1183273	668510	600484	591233	572644	74013.4	17282.9	4.2561e+06	3.46045e+06	4.33893e+06	414770	262242	373970	71809	486476	545809	598694	599036	680013	44751.5	125111	77347.7	775812	752076	754906			PC 34:4	1.62117	1.78554	1.94661	4.88231	4.07693	3.74448	1.32573	1.17962	1.21669	5.01431	0.583661	0.153998
756.554	H79 C42 N1 O8 P1	-0.01ppm	PC 34:3	0	4.10554e+06	3.5018e+06	3.05321e+06	5.63437e+06	5.11758e+06	5300622	1.91443e+06	1.89328e+06	1.92103e+06	6.14511e+06	950549	757210	7.95666e+06	7.09049e+06	8.42398e+06	2.46443e+06	2.38514e+06	2.16737e+06	680411	3.62001e+06	4.20668e+06	6.78124e+06	6.76902e+06	6.97226e+06	1.52404e+06	1.77144e+06	1.67067e+06	5.10812e+06	5.12461e+06	5.33129e+06			PC 34:3	12.1627	10.6741	9.44697	20.81	17.471	16.7739	3.79653	3.71924	3.95326	53.8092	7.49591	6.74707
812.616	H87 C46 N1 O8 P1	-0.10ppm	PC 38:3	0	1.71366e+07	1.36625e+07	1.45598e+07	2.17223e+07	1.82899e+07	1.99277e+07	1.00786e+07	9.47699e+06	9.47709e+06	1.4015e+06	1.16505e+06	1.15609e+06	2.51273e+07	2.0884e+07	2.50142e+07	1.08695e+07	8.89718e+06	8.91395e+06	2.40982e+06	8.38141e+06	1.02852e+07	4.20119e+07	3.92629e+07	3.99991e+07	8.12215e+06	9.71509e+06	9.18825e+06	1.40413e+07	1.32219e+07	1.4284e+07			PC 38:3	50.7671	41.6458	45.0497	80.2289	62.44	63.0614	19.9869	18.617	19.5028	12.2721	9.18747	10.3013
810.601	H85 C46 N1 O8 P1	-0.14ppm	PC 38:4	52521.1	4.60944e+07	3.74448e+07	3.71119e+07	6.71372e+07	5.33346e+07	5.9451e+07	5.53922e+07	5.14036e+07	5.17904e+07	2.64895e+06	2.11651e+06	2.04202e+06	1.06074e+08	8.72617e+07	1.07261e+08	4.4701e+07	35557425	3.66765e+07	4.23143e+06	1.2977e+07	1.5582e+07	6.08258e+07	5.81393e+07	58123316	1.43423e+07	1.68947e+07	1.65776e+07	5.60551e+07	53186820	5.59797e+07			PC 38:4	136.555	114.138	114.828	247.964	182.08	188.133	109.849	100.979	106.579	23.1953	16.6905	18.1953
808.585	H83 C46 N1 O8 P1	-0.24ppm	PC 38:5	0	2.96378e+07	2.50281e+07	2.35241e+07	38015481	3.08084e+07	3.52512e+07	3.04535e+07	2.79518e+07	2.99412e+07	3.27281e+06	2.67764e+06	2.50327e+06	72910442	61110409	7.62082e+07	2.24883e+07	1.83206e+07	1.80847e+07	2.4969e+06	8.5315e+06	1.0259e+07	3.1203e+07	3.00712e+07	30321297	9.66571e+06	1.0899e+07	1.09234e+07	3.21183e+07	3.06333e+07	3.29878e+07			PC 38:5	87.8021	76.2902	72.7863	140.406	105.177	111.553	60.3926	54.9096	61.6157	28.6581	21.1156	22.3052
806.569	H81 C46 N1 O8 P1	0.07ppm	PC 38:6	0	8.62573e+06	7.56039e+06	7.53655e+06	12909671	1.06285e+07	1.19634e+07	5659811	4.97015e+06	5.67402e+06	2483324	2.14499e+06	1.91615e+06	3.59061e+07	3.10565e+07	3.68977e+07	8.80691e+06	7310242	6.95158e+06	440562	5.74835e+06	6.9287e+06	1.19769e+07	1.12588e+07	11715874	2.88399e+06	4.34666e+06	4.24088e+06	1.27066e+07	1.24095e+07	1.29391e+07			PC 38:6	25.5537	23.0454	23.319	47.6805	36.2849	37.8582	11.224	9.76355	11.6765	21.745	16.9151	17.0737
804.553	H79 C46 N1 O8 P1	-0.50ppm	PC 38:7	32465	0	0	73043	241319	184670	554136	285296	247791	307487	834322	100956	49198.6	1.56274e+06	1.34401e+06	1935618	308007	273365	116309	12305.3	185979	301558	210715	301760	288123	40756.4	37748.2	51550.4	570962	539932	560827			PC 38:7	0	0	0.226003	0.891286	0.630446	1.75357	0.565774	0.48677	0.632775	7.30568	0.796124	0.438381
728.522	H75 C40 N1 O8 P1	-0.26ppm	PC 32:3	0	0	0	0	300518	198713	227195	0	0	16577.8	682133	103515	70150.6	541971	443156	590294	0	0	0	0	181885	161035	38708.8	23205.8	81017.3	0	0	0	143354	71170.2	131374			PC 32:3	0	0	0	1.10993	0.67839	0.718962	0	0	0.0341153	5.97305	0.816304	0.625072
784.585	H83 C44 N1 O8 P1	-0.37ppm	PC 36:3	4.82429e+06	7.65321e+07	6.39889e+07	5.92635e+07	6.2976e+07	5.48148e+07	5.96619e+07	2.48402e+07	2.32596e+07	23621437	1.48341e+07	5.58134e+06	5.05074e+06	7.71108e+07	6.55342e+07	7.80217e+07	3.63361e+07	3.0069e+07	2.90804e+07	6.75817e+06	3.2583e+07	3.76987e+07	1.19715e+08	115235607	115467911	1.81255e+07	2.05134e+07	1.94718e+07	5.61021e+07	5.28582e+07	5.6123e+07			PC 36:3	226.727	195.049	183.368	232.595	187.133	188.801	49.2609	45.6921	48.6103	129.894	44.0138	45.0042
840.648	H91 C48 N1 O8 P1	0.06ppm	PC 40:3	0	622814	538480	494592	1148078	840148	1.067e+06	304210	197492	296352	55388	0	25854.6	3.13702e+06	2.87068e+06	3.13232e+06	263014	169590	56626.9	209089	1.35832e+06	1.65e+06	933150	840653	908290	87672.6	189912	63693.4	966634	891219	903805			PC 40:3	1.84509	1.64138	1.53032	4.24031	2.86819	3.37654	0.603282	0.387961	0.609859	0.485001	0	0.230376
838.632	H89 C48 N1 O8 P1	-0.08ppm	PC 40:4	0	3111735	2.33459e+06	2.33943e+06	3.80184e+06	2.99064e+06	3.22951e+06	2.79796e+06	2.70901e+06	2.68806e+06	127633	64638.4	88754.2	1.50854e+07	1.27306e+07	1.54779e+07	1.73081e+06	1.39636e+06	1.36078e+06	436333	2.26595e+06	2.85228e+06	4.73805e+06	4.82166e+06	4.85532e+06	1014085	1.12241e+06	903211	8.17976e+06	7.74011e+06	8.33298e+06			PC 40:4	9.21852	7.11624	7.23845	14.0417	10.2098	10.2198	5.54866	5.32168	5.53173	1.11761	0.509731	0.790838
836.616	H87 C48 N1 O8 P1	-0.15ppm	PC 40:5	0	9.31648e+06	8.46645e+06	8.3594e+06	8.752e+06	6.99177e+06	7.72698e+06	7.16599e+06	6804087	7.08325e+06	260580	195293	188017	2.43837e+07	2.01115e+07	2.46701e+07	6.47101e+06	5.37981e+06	5.39379e+06	1.29227e+06	3.28313e+06	3.73905e+06	1.22917e+07	1.17087e+07	1.17736e+07	5.13451e+06	6433416	6.02297e+06	1.11997e+07	1.05307e+07	1.16183e+07			PC 40:5	27.6001	25.8072	25.8649	32.3246	23.8693	24.4521	14.2109	13.3662	14.5765	2.28175	1.54006	1.67531
834.601	H85 C48 N1 O8 P1	-0.26ppm	PC 40:6	110430	9.96958e+06	8.58161e+06	8.71548e+06	1.19671e+07	1.0313e+07	1.13413e+07	6.56302e+06	5.74545e+06	6.56116e+06	472048	213845	151495	2.52022e+07	2.14409e+07	2.63335e+07	9.12722e+06	7.29944e+06	7.20728e+06	1.29092e+06	2.79243e+06	3.60622e+06	12333876	1.20475e+07	11766602	6234530	7.32856e+06	6.9018e+06	1.11116e+07	1.02414e+07	1.10986e+07			PC 40:6	29.5349	26.1583	26.9667	44.1992	35.2078	35.8897	13.0152	11.2866	13.5022	4.13345	1.68636	1.34989
832.585	H83 C48 N1 O8 P1	-0.34ppm	PC 40:7	12736.1	3.69558e+06	3.11518e+06	3.04142e+06	6.82334e+06	5.59981e+06	6786140	2.27913e+06	2.12075e+06	2.43026e+06	979921	608233	576412	1.11027e+07	9.31412e+06	1.15977e+07	2.92887e+06	2.41319e+06	2.38561e+06	284401	1.039e+06	1.31012e+06	3.61296e+06	3.36824e+06	3.26915e+06	1.31553e+06	1.46674e+06	1.63812e+06	4.26563e+06	4.63471e+06	4.77528e+06			PC 40:7	10.9482	9.49562	9.4105	25.2013	19.1172	21.4748	4.51976	4.16609	5.0012	8.58061	4.79645	5.13608
830.569	H81 C48 N1 O8 P1	-0.41ppm	PC 40:8	228072	1.15684e+06	911767	902056	2.07693e+06	1.59919e+06	1.93453e+06	910079	821169	976346	788472	665296	507124	2.73427e+06	2.40801e+06	2.86277e+06	1.05778e+06	864978	1.39324e+06	232924	244987	392737	693417	631482	618024	331957	326573	223164	1486139	1.65173e+06	1.51867e+06			PC 40:8	3.42715	2.77923	2.79106	7.67092	5.45951	6.12186	1.80478	1.61314	2.00921	6.9042	5.24644	4.51869
782.569	H81 C44 N1 O8 P1	-0.18ppm	PC 36:4	0	4.27628e+07	3.52041e+07	33406240	5.49719e+07	4.39204e+07	48967357	4.7888e+07	4.47144e+07	4.5893e+07	9.71926e+06	4.86465e+06	4.50733e+06	1.55526e+08	1.34264e+08	1.61466e+08	3.84057e+07	3.17666e+07	3.03525e+07	3.69238e+06	15066658	1.78799e+07	5.47888e+07	5.37611e+07	53811880	8.98501e+06	1.01801e+07	1.01339e+07	5.51171e+07	52329313	5.54845e+07			PC 36:4	126.685	107.308	103.363	203.033	149.94	154.958	94.9671	87.8388	94.4426	85.106	38.3621	40.1622
870.695	H97 C50 N1 O8 P1	0.05ppm	PC 42:2	0	0	48430.8	0	777936	675566	777046	23746.4	0	0	58114.3	40948.3	54054.1	3.55341e+06	2.87553e+06	3.39403e+06	369112	355465	286579	311774	2.28283e+06	2.74713e+06	0	0	0	0	0	0	430552	386418	429930			PC 42:2	0	0.147626	0	2.87323	2.30633	2.45897	0.0470917	0	0	0.508874	0.322913	0.481645
868.679	H95 C50 N1 O8 P1	0.17ppm	PC 42:3	0	42261.8	0	0	487469	355269	408469	0	23095.5	0	0	0	15108.6	1.94641e+06	1.62546e+06	1.88388e+06	0	0	0	44783.2	815999	945244	0	0	0	0	0	0	237244	323243	256214			PC 42:3	0.125201	0	0	1.80042	1.21286	1.2926	0	0.0453697	0	0	0	0.134624
866.663	H93 C50 N1 O8 P1	0.05ppm	PC 42:4	0	92333.9	60208.7	0	501715	396390	462754	62263.9	163633	58252.8	139348	73830.4	1.25896e+06	2.15265e+06	1.81396e+06	2.15699e+06	0	0	0	30488.9	471000	595779	138930	147106	221906	0	32750.2	0	610432	572552	652156			PC 42:4	0.273539	0.183527	0	1.85303	1.35324	1.46439	0.123476	0.321446	0.119878	1.22019	0.582218	11.2178
864.648	H91 C50 N1 O8 P1	0.43ppm	PC 42:5	23642.3	460632	344042	268434	845928	691748	714328	340295	386257	334384	41071.4	0	0	3.08257e+06	2.63826e+06	3.20663e+06	200473	173958	38555.8	65304.9	615452	782423	620036	536773	618567	124695	110157	43719.7	711287	740474	809304			PC 42:5	1.36462	1.0487	0.830565	3.12435	2.36157	2.2605	0.674842	0.758779	0.688125	0.359639	0	0
862.632	H89 C50 N1 O8 P1	0.41ppm	PC 42:6	0	442590	314229	343797	602451	506032	532548	65220.4	0	57012.1	0	0	0	2.30538e+06	1.89688e+06	2.48986e+06	195490	186818	172700	54589.4	551687	570730	639922	594339	620671	0	34863.7	69765.1	0	0	0			PC 42:6	1.31117	0.957825	1.06375	2.22509	1.72755	1.68526	0.129339	0	0.117325	0	0	0
860.616	H87 C50 N1 O8 P1	0.03ppm	PC 42:7	0	259798	303408	176448	672489	570897	583282	381083	236467	337417	92555.8	0	0	2.26686e+06	1.95553e+06	2.369e+06	163029	265057	143794	37516	294572	312002	508166	490972	621801	0	57317.3	52049.5	549235	521920	584428			PC 42:7	0.769651	0.924842	0.545952	2.48377	1.94899	1.8458	0.755728	0.464526	0.694367	0.810458	0	0
858.601	H85 C50 N1 O8 P1	-0.25ppm	PC 42:8	0	298060	277734	191728	541219	454217	555884	379062	263696	370933	146901	206515	142697	1.97327e+06	1.63875e+06	2.13844e+06	46030.2	132094	198727	0	75697.5	134741	88425	66769.2	139122	0	26940.9	0	574983	625662	663459			PC 42:8	0.883004	0.846581	0.593228	1.99893	1.55066	1.7591	0.751721	0.518015	0.763339	1.28633	1.62855	1.27149
856.585	H83 C50 N1 O8 P1	-0.44ppm	PC 42:9	0	522495	481177	377018	1.01128e+06	810502	1.01744e+06	482744	470158	479686	47304.6	17311.1	0	870107	853210	1.04422e+06	351212	389058	90282.9	0	0	79429.4	49045.4	48272.2	49636.2	0	76048.2	21452.7	356178	435313	453611			PC 42:9	1.54789	1.46671	1.16654	3.73506	2.76698	3.21969	0.957334	0.923598	0.987142	0.414219	0.136513	0
854.569	H81 C50 N1 O8 P1	-0.61ppm	PC 42:10	0	196061	135497	142835	655882	427206	619576	242272	114329	164777	20010	0	0	892481	680974	978030	166792	137004	55983.4	0	0	0	28945.3	0	0	0	0	43366.6	410754	401608	343741			PC 42:10	0.580832	0.41302	0.441948	2.42243	1.45845	1.96066	0.480452	0.224593	0.339094	0.175216	0	0
###	PhosphatidylcholineOx
748.549	H79 C40 N1 O9 P1	0.83ppm	PCOx 32:1	0	388714	354738	287592	122540	105843	74369.3	0	47677.4	0	32950.8	48463.8	27865.3	52339.9	36356.8	0	42213	0	0	0	1.32203e+06	1.28073e+06	94836.6	130625	28444.5	0	0	0	0	51425.7	25954.9			PCOx 32:1	1.15157	1.08131	0.889843	0.45259	0.361339	0.235342	0	0.0936594	0	0.288531	0.38218	0.248292
804.612	H87 C44 N1 O9 P1	0.66ppm	PCOx 36:1	0	0	0	0	56932.6	58464.8	0	0	0	0	0	13883.1	13346.8	39549.1	0	0	272386	161032	0	0	115991	123452	0	59103	28953.8	48937.4	0	0	0	0	0			PCOx 36:1	0	0	0	0.210275	0.199594	0	0	0	0	0	0.10948	0.118926
776.58	H83 C42 N1 O9 P1	0.05ppm	PCOx 34:1	0	368400	351244	294049	527668	513128	396976	299714	315262	219352	134406	225969	159306	417291	360990	367473	1.3215e+06	1.20457e+06	885321	77234.8	3595818	1.64824e+06	913335	956511	922694	147134	1.30863e+06	377931	349671	415843	289552			PCOx 34:1	1.09139	1.07065	0.909823	1.94889	1.75178	1.25624	0.594365	0.619313	0.451403	1.17691	1.78196	1.41948
774.564	H81 C42 N1 O9 P1	0.05ppm	PCOx 34:2	0	417636	387480	280382	720205	765628	464765	633720	815546	433851	1.44411e+06	338069	246656	158719	332909	142661	529494	526037	390399	209942	626113	835476	122177	225405	197264	406781	734754	382517	850056	846032	635648			PCOx 34:2	1.23725	1.18111	0.867536	2.66	2.61379	1.47075	1.25674	1.60209	0.892817	12.6452	2.66597	2.19781
746.534	H77 C40 N1 O9 P1	0.96ppm	PCOx 32:2	0	0	0	0	0	81046	0	13090.5	51573	0	23710.5	12567.3	18187.1	0	0	0	0	0	0	48505	685644	807131	0	0	0	0	0	0	17000.4	0	27937.5			PCOx 32:2	0	0	0	0	0.276684	0	0.0259599	0.101312	0	0.207619	0.0991042	0.162055
770.533	H77 C42 N1 O9 P1	0.28ppm	PCOx 34:4	0	277675	200183	125896	441456	348103	298636	32068.7	100644	0	26718.4	17350.8	0	0	0	0	0	0	0	0	0	0	0	0	23169.8	0	0	0	45087	0	42035			PCOx 34:4	0.822613	0.610193	0.389536	1.63047	1.18839	0.945036	0.0635957	0.19771	0	0.233958	0.136826	0
772.549	H79 C42 N1 O9 P1	0.06ppm	PCOx 34:3	0	223017	304243	104998	469435	506570	286926	226368	311665	118096	421079	342284	321640	0	46928.2	28311.6	62684.9	42118.6	0	19062.6	213199	151690	0	28372	0	150433	557447	253474	513710	626802	407242			PCOx 34:3	0.660687	0.927386	0.324877	1.73381	1.72939	0.907982	0.448913	0.612247	0.24303	3.68715	2.69921	2.86595
802.595	H85 C44 N1 O9 P1	-0.32ppm	PCOx 36:2	0	96935.6	144156	66306.7	583562	501235	188100	254224	359773	106806	2.01847e+06	214109	130229	67928	59956.4	71657.7	220077	376683	140841	43683.1	41102	53874.4	80072.4	69337.7	58809.2	251736	307467	142218	537897	527860	346612			PCOx 36:2	0.287172	0.439413	0.205161	2.15533	1.71117	0.595243	0.504153	0.706753	0.219794	17.6746	1.68844	1.1604
800.58	H83 C44 N1 O9 P1	-0.33ppm	PCOx 36:3	0	161867	231382	168380	523007	766754	176733	437665	469169	90347.5	1.08681e+07	1.10151e+06	744946	98048	201140	74000.3	9273	51501.4	0	44316.2	23974.1	57682.1	24801.4	58870.3	27013.5	372105	439248	101330	963221	907574	762664			PCOx 36:3	0.479532	0.705293	0.520986	1.93167	2.61763	0.559274	0.867937	0.921654	0.185925	95.1655	8.68634	6.63778
798.564	H81 C44 N1 O9 P1	-0.19ppm	PCOx 36:4	0	0	0	38621.2	629148	624750	405830	550280	691365	308153	4.96292e+06	601445	387469	219982	344819	248550	95295.6	123427	0	0	45563.2	24579	0	0	0	52703.5	236237	137621	1.19639e+06	1.10574e+06	994820			PCOx 36:4	0	0	0.119498	2.32369	2.13284	1.28425	1.09126	1.35814	0.634145	43.4574	4.74292	3.45251
796.549	H79 C44 N1 O9 P1	-0.08ppm	PCOx 36:5	0	48043.4	119406	0	229157	252249	201075	300457	412062	196954	404723	49932.1	27811.3	0	49055.9	55068	0	67095.2	0	0	0	0	0	0	0	0	0	0	535469	429241	386417			PCOx 36:5	0.142329	0.363969	0	0.846368	0.861158	0.636304	0.59584	0.809472	0.405309	3.54393	0.393759	0.247811
828.611	H87 C46 N1 O9 P1	-0.42ppm	PCOx 38:3	0	45729.3	73196.3	67006.6	126723	135635	30753.3	57502.3	130435	0	7.26586e+06	7.79324e+06	516695	72780.3	68635.3	67146	0	0	25748.5	0	0	18066.5	90463.1	115935	65452.1	72226.5	61405.3	64194.7	298443	247557	229390			PCOx 38:3	0.135473	0.223115	0.207326	0.468037	0.463046	0.0973191	0.114033	0.256232	0	63.623	61.4566	4.60397
826.595	H85 C46 N1 O9 P1	-0.72ppm	PCOx 38:4	42256.1	147038	165472	140114	411615	382350	284185	372592	417206	259934	3.51704e+06	3.4148e+06	295915	264462	341352	396422	101780	174487	65267.3	0	0	12517.4	204373	311134	315959	0	249374	233087	737801	664638	655021			PCOx 38:4	0.435601	0.504386	0.433529	1.52026	1.30531	0.899305	0.738891	0.819577	0.534915	30.7967	26.9287	2.63673
824.58	H83 C46 N1 O9 P1	-0.38ppm	PCOx 38:5	0	111452	167789	124884	533336	447631	360418	531929	594719	270516	1.15417e+06	154994	188565	219981	274756	357993	97507	75054.4	45848.4	19478.9	31128.7	16117.4	55841.6	163393	67830.3	223831	57957.6	208243	983312	860887	867344			PCOx 38:5	0.330176	0.511451	0.386406	1.96982	1.52817	1.14055	1.05487	1.16829	0.556692	10.1064	1.22227	1.68019
822.564	H81 C46 N1 O9 P1	-0.48ppm	PCOx 38:6	0	80568.1	75797.5	0	211985	202209	140817	226547	262484	101913	2.53518e+06	349664	247628	70607.1	63278.9	119424	0	0	0	0	0	0	0	0	0	0	42223.7	0	503518	457793	492046			PCOx 38:6	0.238683	0.231044	0	0.782943	0.690324	0.445616	0.449267	0.515635	0.209726	22.1991	2.75741	2.20647
820.548	H79 C46 N1 O9 P1	-0.50ppm	PCOx 38:7	0	0	0	0	0	59638.6	25503.8	79484.1	73326.7	34356.5	183024	187281	0	0	36703.8	45508.8	0	0	0	0	0	0	0	0	0	0	0	0	101543	188328	100621			PCOx 38:7	0	0	0	0	0.203601	0.080707	0.157626	0.144046	0.0707019	1.60264	1.47688	0
854.627	H89 C48 N1 O9 P1	-0.24ppm	PCOx 40:4	0	0	0	0	17788.8	0	25379.1	0	0	0	365027	469078	145187	0	0	0	0	0	0	0	0	0	0	0	0	0	0	17595.2	71867.1	93937.4	133735			PCOx 40:4	0	0	0	0.0657011	0	0.0803124	0	0	0	3.19633	3.69909	1.29368
852.611	H87 C48 N1 O9 P1	-0.26ppm	PCOx 40:5	0	68908.8	119592	24371.9	86407.8	140349	119270	62304.5	95416.2	121366	377372	23371.5	81665.3	115866	159350	84000.7	0	0	91129.4	0	0	0	5808.9	127653	224895	55379.7	60860.6	95996.9	270526	238533	243648			PCOx 40:5	0.204142	0.364538	0.0754095	0.319138	0.479139	0.377431	0.123557	0.187439	0.249759	3.30443	0.184305	0.727673
850.595	H85 C48 N1 O9 P1	-0.49ppm	PCOx 40:6	0	0	93556	102507	128298	77637.2	52094.7	50443.4	61995.4	16836.5	2.08777e+06	463511	108878	49832.2	114026	143325	30966.5	0	0	0	0	0	153672	192666	87247.4	49665.6	65152	236133	317622	280674	226510			PCOx 40:6	0	0.285175	0.317169	0.473857	0.265047	0.164854	0.100035	0.121786	0.0346477	18.2814	3.6552	0.970151
848.58	H83 C48 N1 O9 P1	-0.12ppm	PCOx 40:7	0	0	0	28406.7	54359.8	82561.9	0	51096.7	0	63080	1.68433e+06	137488	57772.5	0	0	0	0	0	0	0	0	0	0	0	0	0	0	0	215748	149854	212130			PCOx 40:7	0	0	0.0878936	0.200772	0.281859	0	0.10133	0	0.129812	14.7487	1.08422	0.514778
846.564	H81 C48 N1 O9 P1	-0.48ppm	PCOx 40:8	0	0	0	0	0	0	0	28222.5	0	0	1075353	63938.1	47175.8	0	0	0	0	0	0	0	0	0	0	0	0	0	0	0	98364.9	42710.9	0			PCOx 40:8	0	0	0	0	0	0	0.0559683	0	0	9.41625	0.504208	0.420357
																																						0	0	0	0	0	0	0	0	0	0	0	0
###	PhosphatidylcholineOx2																																					0	0	0	0	0	0	0	0	0	0	0	0
766.56	H81 C40 N1 O10 P1	0.50ppm	PCOx2 32:0	0	140356	96624.3	179822	0	0	0	0	0	0	139475	171282	165911	0	0	0	0	0	0	0	0	0	269912	150630	0	0	0	0	0	0	0			PCOx2 32:0	0.415805	0.294528	0.556391	0	0	0	0	0	0	1.2213	1.35071	1.47834
792.575	H83 C42 N1 O10 P1	-0.14ppm	PCOx2 34:1	0	51812.5	0	30970.2	113048	331757	109015	197548	372408	69190.9	1.48248e+06	1.91139e+06	1.49374e+06	0	0	0	470585	450034	349720	0	54958	0	47098.9	0	52585.5	252970	68987.7	104728	0	0	0			PCOx2 34:1	0.153495	0	0.0958254	0.417531	1.13259	0.34498	0.391758	0.731572	0.142387	12.9812	15.073	13.3098
790.56	H81 C42 N1 O10 P1	0.54ppm	PCOx2 34:2	41513.1	796059	1753079	980318	699764	3.64654e+06	984463	618705	4.19333e+06	58279.3	1.56865e+06	1.99092e+06	1.69068e+06	2.2216e+06	2.02678e+06	2.67116e+06	2.70984e+06	2.6524e+06	1446529	1.0565e+06	1.32241e+07	1.64265e+07	6.09457e+06	4.19084e+06	5.3764e+06	295552	1956750	50230.3	2.29975e+06	2.80312e+06	2.08389e+06			PCOx2 34:2	2.35833	5.34369	3.03322	2.58451	12.449	3.11534	1.22696	8.23755	0.119932	13.7358	15.7001	15.0647
874.653	H93 C48 N1 O10 P1	-0.07ppm	PCOx2 40:2	0	0	0	0	0	0	0	0	0	0	0	0	0	0	0	0	0	49875.6	0	59012	1.14354e+06	1405107	0	0	0	0	0	0	0	0	0			PCOx2 40:2	0	0	0	0	0	0	0	0	0	0	0	0
818.591	H85 C44 N1 O10 P1	0.61ppm	PCOx2 36:2	0	0	93080.3	63459.6	167549	491754	46768.6	108545	267120	18135.8	288860	391254	261390	69192.1	47152.5	50390.8	105174	368424	17407.7	238288	2.95214e+06	3.83947e+06	381322	313388	257505	128510	331924	0	256485	290987	184847			PCOx2 36:2	0	0.283725	0.196351	0.618826	1.67881	0.148	0.215256	0.52474	0.0373215	2.52938	3.08538	2.3291
846.622	H89 C46 N1 O10 P1	-0.36ppm	PCOx2 38:2	0	0	0	0	0	27241.7	0	0	0	0	64149.7	74622.2	21752.2	0	0	0	0	93575.2	0	162497	1.59513e+06	1.78357e+06	0	27238.6	35057.6	104840	0	0	56299.2	45473.9	79982.9			PCOx2 38:2	0	0	0	0	0.0930008	0	0	0	0	0.561722	0.588462	0.193821
814.559	H81 C44 N1 O10 P1	-0.14ppm	PCOx2 36:4	0	229325	579226	391620	453045	784909	316768	556376	1285926	287988	571317	544810	398861	721504	668954	683490	464047	713586	244211	119170	1.07176e+06	1.26064e+06	2.43213e+06	2624192	2.18081e+06	0	394508	0	1205313	1.15984e+06	996718			PCOx2 36:4	0.679375	1.76558	1.21172	1.67327	2.67961	1.00242	1.10335	2.52612	0.592648	5.00269	4.29631	3.55403
812.543	H79 C44 N1 O10 P1	-0.37ppm	PCOx2 36:5	0	119812	487317	295659	105560	528447	79179.8	261286	1.18549e+06	108836	226392	218456	126732	783151	977696	1.19483e+06	613864	750420	328842	92627.9	506935	478001	768861	792528	687098	0	241300	31939.9	504576	678043	462866			PCOx2 36:5	0.354944	1.48543	0.914803	0.389877	1.80407	0.250565	0.518158	2.32883	0.223973	1.98238	1.72271	1.12924
788.544	H79 C42 N1 O10 P1	-0.01ppm	PCOx2 34:3	0	449593	863356	554733	297614	675445	347801	173005	777897	40598.6	471013	500994	467069	797489	767788	977260	1.03043e+06	1.30149e+06	706237	553986	5.93865e+06	3.00329e+06	1.47134e+06	984439	1.37305e+06	55598.4	1118790	55278.6	969980	881671	772395			PCOx2 34:3	1.33192	2.63166	1.71641	1.0992	2.30591	1.10062	0.343088	1.52813	0.0835474	4.12439	3.95078	4.16178
844.606	H87 C46 N1 O10 P1	-0.25ppm	PCOx2 38:3	0	0	100850	29024.2	48208	120538	14272.7	-1.7	194209	12949.3	364883	2.34427e+06	1234.3	33298	47811.9	23130.2	80385.1	71105.4	0	170010	1.67574e+06	2.17935e+06	585826	790631	619147	0	5412.6	37538.6	0	0	506.4			PCOx2 38:3	0	0.307409	0.0898042	0.178051	0.411506	0.0451661	-3.37128e-06	0.381512	0.0266482	3.19507	18.4867	0.0109981
842.59	H85 C46 N1 O10 P1	-0.17ppm	PCOx2 38:4	0	88190.9	95034.8	96851.8	418463	452184	255794	400853	602322	298056	1620132	1.29869e+06	227450	289236	390101	423831	0	34216.7	0	0	397836	570372	275993	296969	244724	0	111988	196709	704814	684526	580680			PCOx2 38:4	0.261266	0.289683	0.299671	1.54555	1.54372	0.809461	0.794935	1.18323	0.613367	14.1866	10.2413	2.02668
840.575	H83 C46 N1 O10 P1	-0.03ppm	PCOx2 38:5	0	0	392992	252980	279538	489193	235477	460312	1.22148e+06	295485	1.23875e+06	1.40961e+06	375575	1.31191e+06	1.3253e+06	1.73269e+06	123136	199080	0	0	501626	585647	646309	779017	724983	0	62921.8	83757.2	955270	993561	1.00163e+06			PCOx2 38:5	0	1.19791	0.782751	1.03244	1.67006	0.745171	0.912848	2.39953	0.608075	10.847	11.116	3.34653
838.559	H81 C46 N1 O10 P1	-0.02ppm	PCOx2 38:6	0	77958.3	371306	117868	134883	270271	59864.8	218928	729086	175868	832554	388728	372643	824186	842882	1.06609e+06	180234	254972	280733	38575.1	283310	381723	502469	254353	411601	39998.5	201883	89440.1	458623	514074	593772			PCOx2 38:6	0.230952	1.13181	0.364697	0.498175	0.922681	0.189443	0.434157	1.43225	0.361918	7.2902	3.06547	3.32041
836.543	H79 C46 N1 O10 P1	-0.20ppm	PCOx2 38:7	0	49244.1	98176	44828.9	0	80202.1	16619.5	57503	523163	0	234111	146426	144024	893948	814440	1.13659e+06	520552	717144	228874	0	424146	453100	743192	472937	586417	0	77303.2	0	109342	267901	108487			PCOx2 38:7	0.145886	0.299258	0.138706	0	0.273803	0.0525926	0.114035	1.02772	0	2.04998	1.1547	1.28332
816.575	H83 C44 N1 O10 P1	-0.15ppm	PCOx2 36:3	0	177399	327597	134134	556358	751780	211905	407189	703565	79654.3	1.27278e+06	1.47751e+06	42204.2	326664	338930	347227	102426	264508	0	327357	3195667	1.79733e+06	1.43862e+06	3.1165e+06	1.30855e+06	207942	420266	91310.2	881106	958764	767770			PCOx2 36:3	0.525546	0.998575	0.415027	2.05485	2.56651	0.670576	0.807499	1.38211	0.16392	11.145	11.6514	0.376058
872.638	H91 C48 N1 O10 P1	1.03ppm	PCOx2 40:3	0	0	0	0	0	0	0	0	0	0	196379	200778	298070	0	0	0	0	0	0	48438.7	1.11695e+06	1.53413e+06	0	0	0	0	0	0	0	0	0			PCOx2 40:3	0	0	0	0	0	0	0	0	0	1.71958	1.58331	2.65593
870.622	H89 C48 N1 O10 P1	0.73ppm	PCOx2 40:4	0	0	0	0	0	0	0	0	0	0	138430	167831	311402	0	0	0	0	27332.7	0	0	1898.7	0	0	24217.9	0	0	59635.3	0	80532.8	820457	-1.8			PCOx2 40:4	0	0	0	0	0	0	0	0	0	1.21216	1.3235	2.77473
868.606	H87 C48 N1 O10 P1	0.08ppm	PCOx2 40:5	0	0	0	0	39889.7	-1.8	89789.6	0	53940.3	0	87209.9	1.25637e+06	-1.8	146406	138889	133811	0	19464.5	0	0	353841	398741	95249.7	88658.9	47004.5	0	0	14344.9	182108	232092	223536			PCOx2 40:5	0	0	0	0.147328	-6.14504e-06	0.28414	0	0.105963	0	0.763647	9.9076	-1.60388e-05
866.592	H85 C48 N1 O10 P1	1.59ppm	PCOx2 40:6	0	0	67189.7	0	51226.1	314467	31809	74713.4	458852	43399	848692	1.68021e+06	1.24869e+06	0	155826	95608.4	0	52315.8	27796.2	175204	461933	535546	89380.2	81510.6	95715.5	0	106147	161562	224156	200502	180875			PCOx2 40:6	0	0.204806	0	0.189198	1.07356	0.10066	0.148165	0.901387	0.0893103	7.43151	13.2499	11.1263
864.575	H83 C48 N1 O10 P1	0.36ppm	PCOx2 40:7	0	0	0	0	0	28730.8	0	0	0	0	341761	142031	0	28984.4	42130.3	78517.3	0	0	0	0	55278.4	123357	47875.3	667638	0	0	67836.6	0	103927	89837	98688.4			PCOx2 40:7	0	0	0	0	0.0980845	0	0	0	0	2.9926	1.12004	0
862.559	H81 C48 N1 O10 P1	0.10ppm	PCOx2 40:8	0	0	0	33244.5	0	0	0	0	0	0	0	0	39124.1	0	26551	50545.1	0	0	0	0	0	0	0	0	0	0	0	0	0	0	0			PCOx2 40:8	0	0	0.102862	0	0	0	0	0	0	0	0	0.348612
																																						0	0	0	0	0	0	0	0	0	0	0	0
###	PhosphatidylcholineOx3																																					0	0	0	0	0	0	0	0	0	0	0	0
808.569	H83 C42 N1 O11 P1	-0.66ppm	PCOx3 34:1	1157567	0	0	0	0	0	0	0	0	0	505057	754058	429330	0	0	0	0	0	0	599272	0	0	0	0	0	307744	128605	194006	0	0	0			PCOx3 34:1	0	0	0	0	0	0	0	0	0	4.4225	5.94641	3.82552
804.54	H79 C42 N1 O11 P1	1.63ppm	PCOx3 34:3	0	0	0	0	0	0	0	0	0	0	486745	688234	868379	0	0	0	0	0	0	0	0	0	0	0	0	0	0	0	0	0	0			PCOx3 34:3	0	0	0	0	0	0	0	0	0	4.26215	5.42733	7.73763
832.571	H83 C44 N1 O11 P1	1.71ppm	PCOx3 36:3	107871	0	-1.7	-1.7	-1.7	-1.7	0	-1.7	113918	-1.7	170857	277785	396637	0	0	0	0	0	0	50160.8	0	0	0	0	0	0	6509	0	0	0	0			PCOx3 36:3	0	-5.1819e-06	-5.26e-06	-6.27877e-06	-5.80365e-06	0	-3.37128e-06	0.223784	-3.49841e-06	1.4961	2.19058	3.53421
830.554	H81 C44 N1 O11 P1	0.31ppm	PCOx3 36:4	26597	0	0	0	69181.4	211283	20517	350080	393613	55030.4	2.27726e+06	3.54438e+06	1.92946e+06	0	42151.1	84851.3	0	22712.8	0	0	0	0	0	0	0	0	38203.9	0	312490	274001	187628			PCOx3 36:4	0	0	0	0.255514	0.721301	0.0649263	0.694246	0.773229	0.113246	19.9406	27.9506	17.1923
828.539	H79 C44 N1 O11 P1	1.06ppm	PCOx3 36:5	571847	0	0	0	0	0	0	103958	108959	0	718560	409521	571600	0	0	0	0	0	0	215215	0	0	0	0	0	84109	0	0	132828	133171	58654.9			PCOx3 36:5	0	0	0	0	0	0	0.206161	0.214043	0	6.29202	3.22943	5.0932
860.603	H87 C46 N1 O11 P1	2.07ppm	PCOx3 38:3	0	0	0	0	0	0	0	0	-1.7	-1.7	129569	114699	184929	-1.7	0	-1.7	0	0	0	0	0	0	0	0	0	0	0	0	0	0	0			PCOx3 38:3	0	0	0	0	0	0	0	-3.33955e-06	-3.49841e-06	1.13456	0.9045	1.64779
858.586	H85 C46 N1 O11 P1	0.22ppm	PCOx3 38:4	0	0	0	0	126263	127199	75958.3	264648	322169	77151.7	1.23458e+06	418751	342139	0	42887.5	0	0	0	0	0	0	0	0	0	0	0	48465.9	0	220505	285436	130410			PCOx3 38:4	0	0	0	0.466339	0.434245	0.240371	0.524825	0.632882	0.15877	10.8105	3.30222	3.04861
856.57	H83 C46 N1 O11 P1	-0.25ppm	PCOx3 38:5	0	0	0	0	135075	130231	0	366788	410651	109946	756935	191653	224600	0	0	0	0	0	0	0	0	0	0	0	0	0	0	0	346397	352787	210117			PCOx3 38:5	0	0	0	0.498886	0.444596	0	0.72738	0.8067	0.226256	6.62805	1.51135	2.00129
854.554	H81 C46 N1 O11 P1	-0.04ppm	PCOx3 38:6	49592.9	0	0	0	82564	129484	24837.9	185870	232996	33122	609805	164342	202796	0	34255.4	0	0	0	903677	0	0	0	0	0	0	0	0	0	144043	230556	87921.9			PCOx3 38:6	0	0	0	0.304942	0.442048	0.0785998	0.368601	0.457708	0.0681614	5.33971	1.29598	1.80699
852.539	H79 C46 N1 O11 P1	0.07ppm	PCOx3 38:7	0	0	24730.5	0	0	0	0	0	0	0	85623.6	91102.7	165921	0	0	0	0	0	0	0	0	0	0	0	0	0	0	0	34822.3	0	0			PCOx3 38:7	0	0.0753829	0	0	0	0	0	0	0	0.749757	0.718425	1.47842
884.601	H87 C48 N1 O11 P1	-0.05ppm	PCOx3 40:5	0	0	0	0	0	0	0	0	0	0	157006	42364.4	118925	0	0	0	0	0	0	0	0	0	0	0	0	0	0	0	0	0	0			PCOx3 40:5	0	0	0	0	0	0	0	0	0	1.37481	0.334081	1.05967
882.585	H85 C48 N1 O11 P1	-0.26ppm	PCOx3 40:6	0	0	0	0	0	0	0	25718.7	0	0	377982	11236.3	0	0	0	0	0	0	0	0	0	0	0	0	0	0	0	0	87048.1	28304.1	32635.6			PCOx3 40:6	0	0	0	0	0	0	0.051003	0	0	3.30977	0.0886081	0
880.569	H83 C48 N1 O11 P1	-0.60ppm	PCOx3 40:7	0	0	0	0	0	0	0	0	0	0	270422	330580	29835.9	0	0	0	0	0	0	0	0	0	0	0	0	0	0	0	0	22494	0			PCOx3 40:7	0	0	0	0	0	0	0	0	0	2.36793	2.60691	0.265851
878.554	H81 C48 N1 O11 P1	-0.43ppm	PCOx3 40:8	0	0	0	0	0	0	0	0	0	0	161383	3.45236e+06	0	0	0	0	0	0	0	0	0	0	0	0	0	0	0	0	0	0	0			PCOx3 40:8	0	0	0	0	0	0	0	0	0	1.41314	27.2249	0
																																						0	0	0	0	0	0	0	0	0	0	0	0
																																						0	0	0	0	0	0	0	0	0	0	0	0
###	PhosphatidylcholineOx4																																					0	0	0	0	0	0	0	0	0	0	0	0
798.548	H81 C40 N1 O12 P1	-0.84ppm	PCOx4 32:0	0	0	0	0	0	0	18973.7	0	0	0	0	18155.2	19631.8	0	0	0	0	0	0	0	0	0	0	0	0	87949.3	74209.1	87374.7	43336.7	36393.6	25563.4			PCOx4 32:0	0	0	0	0	0	0.0600425	0	0	0	0	0.14317	0.174928
820.533	H79 C42 N1 O12 P1	-0.36ppm	PCOx4 34:3	130345	0	0	0	0	0	24123.9	0	54081.4	0	414555	498312	601923	0	0	0	0	0	0	41544.2	0	0	0	0	0	0	0	0	0	0	0			PCOx4 34:3	0	0	0	0	0	0.0763403	0	0.10624	0	3.63002	3.92963	5.36339
848.565	H83 C44 N1 O12 P1	0.05ppm	PCOx4 36:3	14243.1	0	0	0	0	28442.2	0	16370.3	114821	20901.8	321616	365150	378119	0	0	0	0	0	0	0	0	0	0	0	0	0	70813	0	30181	37442.1	0			PCOx4 36:3	0	0	0	0	0.0970992	0	0.0324641	0.225559	0.0430136	2.81621	2.87953	3.36921
846.549	H81 C44 N1 O12 P1	0.22ppm	PCOx4 36:4	0	0	0	0	39695.2	31620.4	0	124732	226975	0	159937	242220	210058	0	0	0	0	0	0	0	0	0	0	0	0	0	0	0	52803.5	122110	45412.4			PCOx4 36:4	0	0	0	0.14661	0.107949	0	0.247356	0.445878	0	1.40047	1.91012	1.87171
844.534	H79 C44 N1 O12 P1	1.24ppm	PCOx4 36:5	0	0	0	0	0	0	0	0	0	0	191708	295391	237464	0	0	0	0	0	0	0	0	0	0	0	0	0	18830.5	0	0	0	30121.6			PCOx4 36:5	0	0	0	0	0	0	0	0	0	1.67867	2.32942	2.11591
842.519	H77 C44 N1 O12 P1	0.83ppm	PCOx4 36:6	0	29091.4	0	0	0	62103.8	0	0	20914.9	0	145663	181888	191699	0	0	0	0	0	0	0	0	0	0	0	0	0	0	0	0	53610.5	0			PCOx4 36:6	0.0861833	0	0	0	0.212017	0	0	0.0410861	0	1.27549	1.43434	1.70812
876.596	H87 C46 N1 O12 P1	0.27ppm	PCOx4 38:3	0	0	0	0	0	0	0	0	0	0	0	0	0	0	0	0	0	0	0	0	0	0	0	0	0	0	0	0	0	0	0			PCOx4 38:3	0	0	0	0	0	0	0	0	0	0	0	0
874.581	H85 C46 N1 O12 P1	0.27ppm	PCOx4 38:4	0	0	0	0	15842.5	54436.4	0	89225.2	132654	0	93502.8	170891	110455	0	0	0	0	0	0	0	0	0	0	0	0	0	0	0	79198.6	25868.5	0			PCOx4 38:4	0	0	0	0.0585126	0.185841	0	0.176943	0.260592	0	0.81875	1.34762	0.984198
872.565	H83 C46 N1 O12 P1	0.24ppm	PCOx4 38:5	0	0	0	0	45931.9	59098.3	0	49064.2	249114	0	95986.5	55526.7	78250.1	0	0	0	0	0	0	0	0	0	0	0	0	0	0	0	72356.7	165937	46498.2			PCOx4 38:5	0	0	0	0.169645	0.201756	0	0.0972996	0.48937	0	0.840499	0.437877	0.697242
870.549	H81 C46 N1 O12 P1	0.06ppm	PCOx4 38:6	0	0	0	0	0	51005.4	0	0	93886.6	0	234081	113699	97710.9	0	0	0	0	0	0	0	0	0	0	0	0	0	33677.5	0	0	39271.8	31455.4			PCOx4 38:6	0	0	0	0	0.174128	0	0	0.184435	0	2.04971	0.896615	0.870646
868.534	H79 C46 N1 O12 P1	0.27ppm	PCOx4 38:7	0	0	0	0	0	0	0	0	0	0	79601.7	38232.4	121553	0	0	0	0	0	0	0	0	0	0	0	0	0	0	0	0	0	32385.6			PCOx4 38:7	0	0	0	0	0	0	0	0	0	0.697026	0.301496	1.08309
902.61	H89 C48 N1 O12 P1	-1.39ppm	PCOx4 40:4	18029.7	0	0	0	0	0	0	0	0	78875.6	198188	227201	270111	0	0	0	49461.8	0	0	0	0	0	0	0	0	0	0	0	0	0	0			PCOx4 40:4	0	0	0	0	0	0	0	0	0.162317	1.73542	1.79168	2.40681
900.595	H87 C48 N1 O12 P1	-0.70ppm	PCOx4 40:5	12059.3	0	0	0	0	0	0	0	0	0	71942.9	54918.2	72659.3	0	0	0	0	0	0	0	0	0	0	0	0	0	0	0	0	0	0			PCOx4 40:5	0	0	0	0	0	0	0	0	0	0.629963	0.433078	0.647425
898.58	H85 C48 N1 O12 P1	-0.55ppm	PCOx4 40:6	0	0	0	0	0	0	0	0	0	0	120298	25115.5	0	0	0	0	0	0	283228	0	0	0	0	0	0	0	0	0	0	0	0			PCOx4 40:6	0	0	0	0	0	0	0	0	0	1.05339	0.198058	0
896.564	H83 C48 N1 O12 P1	-1.01ppm	PCOx4 40:7	31677.2	0	0	0	0	0	0	0	0	0	134612	0	0	0	0	0	0	0	0	0	0	0	0	0	0	0	0	0	0	0	0			PCOx4 40:7	0	0	0	0	0	0	0	0	0	1.17872	0	0
894.548	H81 C48 N1 O12 P1	-0.89ppm	PCOx4 40:8	0	0	0	0	22781.9	0	0	0	0	0	51824.9	24320.5	0	0	30714.5	0	0	0	0	0	0	0	0	0	0	0	0	0	0	0	0			PCOx4 40:8	0	0	0	0.0841426	0	0	0	0	0	0.453801	0.191789	0
																																						0	0	0	0	0	0	0	0	0	0	0	0
																																						0	0	0	0	0	0	0	0	0	0	0	0
###	PhosphatidylcholineOx5																																					0	0	0	0	0	0	0	0	0	0	0	0
868.59	H87 C44 N1 O13 P1	-1.13ppm	PCOx5 36:1	0	76958.2	147285	88411.5	97259.3	170799	151618	166907	159529	160142	22544.6	28289.3	29186.8	495975	471529	519994	117174	145157	52309	14967	0	0	61149.6	323617	0	115056	125665	40489.2	585804	511390	487474			PCOx5 36:1	0.227989	0.448951	0.273555	0.359217	0.583094	0.479796	0.330995	0.313385	0.329554	0.19741	0.223086	0.260067
866.574	H85 C44 N1 O13 P1	-1.77ppm	PCOx5 36:2	0	0	41122.3	0	31407.4	27068.4	18059.8	0	18395	0	0	0	0	182731	143713	68447.2	0	0	0	0	0	0	0	27673.9	0	0	0	0	90027.5	133054	130357			PCOx5 36:2	0	0.125348	0	0.116	0.0924092	0.0571504	0	0.0361359	0	0	0	0
864.559	H83 C44 N1 O13 P1	-0.32ppm	PCOx5 36:3	0	0	0	0	0	0	0	0	15666.1	0	13506.7	28502.7	12793.9	0	0	0	0	0	0	0	0	0	0	0	0	0	0	0	0	0	0			PCOx5 36:3	0	0	0	0	0	0	0	0.0307751	0	0.11827	0.224769	0.113999
862.544	H81 C44 N1 O13 P1	-0.34ppm	PCOx5 36:4	0	0	0	0	0	38052.1	0	0	33211.7	0	0	29348.7	14276	0	22862.5	0	0	0	0	0	0	0	0	0	0	0	0	0	34509.1	0	0			PCOx5 36:4	0	0	0	0	0.129907	0	0	0.0652424	0	0	0.23144	0.127205
892.59	H87 C46 N1 O13 P1	-1.25ppm	PCOx5 38:3	0	0	0	0	0	0	0	0	0	0	21204.1	0	34019.2	0	0	0	0	0	0	0	0	0	0	0	0	0	0	0	0	0	0			PCOx5 38:3	0	0	0	0	0	0	0	0	0	0.185672	0	0.303126
890.575	H85 C46 N1 O13 P1	0.03ppm	PCOx5 38:4	0	0	0	0	0	0	0	0	20142.4	0	47234.3	24065.4	15173.5	0	0	0	0	0	0	0	0	0	0	0	0	0	0	0	0	20513.8	0			PCOx5 38:4	0	0	0	0	0	0	0	0.0395685	0	0.413604	0.189777	0.135202
888.559	H83 C46 N1 O13 P1	-0.36ppm	PCOx5 38:5	0	0	0	0	0	0	0	67288.1	132606	0	23130.1	17021.5	13857.6	0	0	0	0	0	0	0	0	0	0	0	0	0	0	0	0	0	0			PCOx5 38:5	0	0	0	0	0	0	0.13344	0.260496	0	0.202537	0.13423	0.123477
886.544	H81 C46 N1 O13 P1	0.12ppm	PCOx5 38:6	0	0	0	0	0	0	0	0	0	0	22172.3	26674.5	19020.3	0	0	0	0	0	0	0	0	0	0	0	0	0	0	0	0	0	0			PCOx5 38:6	0	0	0	0	0	0	0	0	0	0.19415	0.210352	0.169479
884.529	H79 C46 N1 O13 P1	0.87ppm	PCOx5 38:7	0	0	0	0	0	0	0	0	0	0	0	80781.4	0	0	0	0	0	0	0	0	45073.6	0	0	0	0	0	0	0	0	0	0			PCOx5 38:7	0	0	0	0	0	0	0	0	0	0	0.637033	0
918.605	H89 C48 N1 O13 P1	-1.45ppm	PCOx5 40:4	13911.4	67780.7	0	0	0	0	0	0	0	140531	21427	29497.1	48562.2	0	0	0	0	0	0	0	0	0	0	0	0	0	0	0	57980.1	90608.6	21553.9			PCOx5 40:4	0.2008	0	0	0	0	0	0	0	0.289198	0.187624	0.232611	0.43271
916.591	H87 C48 N1 O13 P1	0.27ppm	PCOx5 40:5	13650.2	0	0	0	0	0	0	0	0	0	0	0	18004.6	0	0	0	0	0	0	0	0	0	0	0	0	0	0	0	0	0	0			PCOx5 40:5	0	0	0	0	0	0	0	0	0	0	0	0.160429
914.575	H85 C48 N1 O13 P1	-0.16ppm	PCOx5 40:6	0	0	0	0	0	0	0	0	0	0	34815	19410.8	19026.5	0	0	0	0	0	0	0	0	0	0	0	0	0	0	0	0	0	0			PCOx5 40:6	0	0	0	0	0	0	0	0	0	0.304855	0.153071	0.169534
912.56	H83 C48 N1 O13 P1	-0.03ppm	PCOx5 40:7	0	0	0	0	0	65094.1	0	0	127114	0	0	28454.2	0	0	55184.2	0	0	0	0	0	743687	0	0	33071.3	0	0	0	0	0	47220.8	0			PCOx5 40:7	0	0	0	0	0.222226	0	0	0.249709	0	0	0.224386	0
910.545	H81 C48 N1 O13 P1	1.15ppm	PCOx5 40:8	0	0	0	0	0	0	0	0	0	0	0	0	0	0	0	51730.2	0	0	0	0	0	0	0	0	0	0	0	0	0	0	0			PCOx5 40:8	0	0	0	0	0	0	0	0	0	0	0	0
[truncated: 49 more columns]

## Sheet: LPC
																																				Normalization
###	LPC				Lipo 1	Lipo 1 + Fento	Lipo 1 + Fento + Toc	PDAC 1	PDAC1 + Fento	PDAC1 + Fento + Toc	PDAC 2	PDAC2 + Fento	PDAC2 + Fento + Toc	PDAC 3	PDAC3 + Fento	PDAC3 + Fento + Toc	Angio breast	Angio breast + Fento	Angio breast + Fento + Toc	Lipo 2	Lipo 2 + Fento	Lipo 2 + Fento + Toc	Lipo 3	Lipo 3 + Fento	Lipo 3 + Fento + Toc	Lipo 4	Lipo 4 + Fento	Lipo 4 + Fento + Toc	Lipo 5	Lipo 5 + Fento	Lipo 5 + Fento + Toc	UPS	UPS + Fento	UPS + Fento + Toc	PC nmol	2667.51	2292.99	2287.29	4181.65	3312.04	3302.3	1007.55	948.236	982.365	1070.08	827.872	899.844	6235.37	7279.15
498.284	H45 C22 N1 O9 P1	0.23ppm	LPC 12:0	1862097	900652	754296	577967	577455	602803	675460	1.27827e+06	1.41155e+06	1.11802e+06	1.34523e+06	1.34255e+06	1.23102e+06	588276	483155	640427	743507	743094	750793	1.51452e+06	244540	284174	397821	284118	246216	1.71491e+06	1.30063e+06	1871860	1.2085e+06	1.12833e+06	1.07047e+06		Lipo 1	Lipo 1 + Fento	Lipo 1 + Fento + Toc	PDAC 1	PDAC1 + Fento	PDAC1 + Fento + Toc	PDAC 2	PDAC2 + Fento	PDAC2 + Fento + Toc	PDAC 3	PDAC3 + Fento	PDAC3 + Fento + Toc	Angio breast	Angio breast + Fento
554.346	H53 C26 N1 O9 P1	-0.14ppm	LPC 16:0	0	728581	707538	112413	1.42393e+06	1.60531e+06	1.4105e+06	1.06335e+06	1.14546e+06	901528	9.95865e+06	7.39319e+06	6.03727e+06	749314	699431	971786	1.37488e+06	1326930	1.04897e+06	1.43771e+06	3.86619e+06	6038644	957058	818384	285756	1330175	1.54877e+06	1.05083e+06	1.12895e+06	1.13214e+06	1.04409e+06	LPC 16:0	24.2685	28.1403	5.83492	73.9762	79.8921	62.6463	24.9561	24.3448	24.1908	222.087	165.205	147.128	38.2124	43.429
552.331	H51 C26 N1 O9 P1	0.29ppm	LPC 16:1	0	33772.1	56698.8	27137.6	61748.4	63032.5	43562.3	50671.8	46342	41586.3	1.14179e+06	1.11605e+06	1344230	61080.3	43766.7	45332	52268.8	47344.6	34952.2	68119.3	1.31802e+06	1.30827e+06	24974	15470.8	8718.2	81397.5	115889	70566.2	80132.1	93895.2	68818.2	LPC 16:1	1.12492	2.25503	1.40861	3.20796	3.13697	1.93478	1.18923	0.984918	1.11589	25.4631	24.9387	32.7588	3.11488	2.71756
582.378	H57 C28 N1 O9 P1	0.15ppm	LPC 18:0	0	642754	561954	563735	1.46049e+06	1412175	1.34321e+06	1.04596e+06	1.04883e+06	860848	4977827	3.74402e+06	2.82993e+06	407589	548477	451711	1.40807e+06	1.41448e+06	1.10398e+06	1.12934e+06	5.17876e+06	5.48606e+06	890469	698027	513555	1.33509e+06	1.19614e+06	920923	678026	662503	628096	LPC 18:0	21.4096	22.3501	29.2613	75.8755	70.2804	59.6573	24.5479	22.2911	23.0992	111.01	83.6623	68.9651	20.7856	34.056
580.362	H55 C28 N1 O9 P1	0.11ppm	LPC 18:1	0	393238	457089	222846	662784	622257	618560	772908	874237	609879	1.82178e+06	2.72889e+06	1.48042e+06	319256	305588	417547	654951	634265	489993	1.02363e+06	5.9414e+06	5.32339e+06	369449	315930	266663	807850	921548	642946	696338	666998	638478	LPC 18:1	13.0984	18.1794	11.567	34.433	30.9682	27.4728	18.1395	18.5804	16.3649	40.6274	60.9784	36.0778	16.2809	18.9745
578.346	H53 C28 N1 O9 P1	0.08ppm	LPC 18:2	0	98389.2	90861	98435.3	84595.3	75063	72660.4	58081	62714.4	38588.4	602040	398391	427136	84156.9	162110	100242	224257	162115	164416	63660.4	1396308	1.39933e+06	104338	35791.6	107445	95155.1	85681.6	59811.5	257243	244935	247762	LPC 18:2	3.27726	3.61374	5.10939	4.39491	3.7357	3.22715	1.36312	1.33288	1.03544	13.4261	8.90226	10.4093	4.2917	10.0657
604.362	H55 C30 N1 O9 P1	0.27ppm	LPC 20:3	0	10892.3	546.1	4551.3	2348.4	21024.7	19562.9	50880.2	139955	33228.1	0	0	0	-1.4	0	0	21844.4	13738.7	14062.1	56208.3	2.22144e+06	2.21915e+06	0	0	0	44708	70227.6	31288.8	19004.9	20344	7878.4	LPC 20:3	0.362814	0.0217196	0.23624	0.122004	1.04635	0.86887	1.19412	2.9745	0.891611	0	0	0	-7.1395e-05	0
602.347	H53 C30 N1 O9 P1	0.41ppm	LPC 20:4	0	50686.9	47486.4	43494.7	75692.8	72450.7	47341.5	86631	109794	71229	0	0	0	113343	112586	142217	100702	165569	69629	57656.7	0	0	0	0	8258.5	45939.3	68034.4	38743	205419	169482	187464	LPC 20:4	1.68834	1.88864	2.25764	3.9324	3.60569	2.10263	2.03316	2.33347	1.91129	0	0	0	5.78007	6.99068
630.378	H57 C32 N1 O9 P1	0.36ppm	LPC 22:4	0	0	0	0	0	0	0	6805.3	11568.2	9891.6	0	0	0	0	12181.4	0	0	0	0	13820.6	0	0	0	0	0	9672.9	12799.5	4021.2	23937.7	12764.3	26881.4	LPC 22:4	0	0	0	0	0	0	0.159715	0.245862	0.265422	0	0	0	0	0.756366
628.362	H55 C32 N1 O9 P1	0.34ppm	LPC 22:5	0	6359.7	11085.4	3550	17323.6	41938.1	32250.7	69511.2	57547.1	57565.1	0	0	0	5841.9	5723.1	0	10220.7	18481.7	22080.8	99788.2	0	0	0	0	0	81304.1	76908.8	55233.9	17244.8	5670.9	2951.4	LPC 22:5	0.211836	0.44089	0.184267	0.899998	2.08715	1.43239	1.63137	1.22306	1.54465	0	0	0	0.297916	0.355358
626.346	H53 C32 N1 O9 P1	-0.10ppm	LPC 22:6	16590.7	16910.6	15708.9	8567	14725.5	25893.6	29413.1	41854.8	42071.4	37892.4	0	0	0	0	10960.2	9511.5	13113.2	9474.8	7801.7	60128.9	0	0	0	0	0	75065	58588.4	42946	28884.2	29080.7	22346.3	LPC 22:6	0.563278	0.624777	0.444679	0.765021	1.28866	1.30636	0.9823	0.894154	1.01677	0	0	0	0	0.68054
[truncated: 46 more columns]

## Sheet: PE and PEOx
precursorexpmz$A	sumcomposition	precursorppmdev$A	name	intensity:E8_Sebastian_10_00.mzML	intensity:E8_Sebastian_10_01.mzML	intensity:E8_Sebastian_10_02.mzML	intensity:E8_Sebastian_10_03.mzML	intensity:E8_Sebastian_10_04.mzML	intensity:E8_Sebastian_10_05.mzML	intensity:E8_Sebastian_10_06.mzML	intensity:E8_Sebastian_10_07.mzML	intensity:E8_Sebastian_10_08.mzML	intensity:E8_Sebastian_10_09.mzML	intensity:E8_Sebastian_10_10.mzML	intensity:E8_Sebastian_10_11.mzML	intensity:E8_Sebastian_10_12.mzML	intensity:E8_Sebastian_10_13.mzML	intensity:E8_Sebastian_10_14.mzML	intensity:E8_Sebastian_10_15.mzML	intensity:E8_Sebastian_10_16.mzML	intensity:E8_Sebastian_10_17.mzML	intensity:E8_Sebastian_10_18.mzML	intensity:E8_Sebastian_10_19.mzML	intensity:E8_Sebastian_10_20.mzML	intensity:E8_Sebastian_10_21.mzML	intensity:E8_Sebastian_10_22.mzML	intensity:E8_Sebastian_10_23.mzML	intensity:E8_Sebastian_10_24.mzML	intensity:E8_Sebastian_10_25.mzML	intensity:E8_Sebastian_10_26.mzML	intensity:E8_Sebastian_10_27.mzML	intensity:E8_Sebastian_10_28.mzML	intensity:E8_Sebastian_10_29.mzML	intensity:E8_Sebastian_10_30.mzML		name	intensity:E8_Sebastian_10_01.mzML	intensity:E8_Sebastian_10_02.mzML	intensity:E8_Sebastian_10_03.mzML	intensity:E8_Sebastian_10_04.mzML	intensity:E8_Sebastian_10_05.mzML	intensity:E8_Sebastian_10_06.mzML	intensity:E8_Sebastian_10_07.mzML	intensity:E8_Sebastian_10_08.mzML	intensity:E8_Sebastian_10_09.mzML	intensity:E8_Sebastian_10_10.mzML	intensity:E8_Sebastian_10_11.mzML	intensity:E8_Sebastian_10_12.mzML	intensity:E8_Sebastian_10_13.mzML
					Lipo 1	Lipo 1 + Fento	Lipo 1 + Fento + Toc	PDAC 1	PDAC1 + Fento	PDAC1 + Fento + Toc	PDAC 2	PDAC2 + Fento	PDAC2 + Fento + Toc	PDAC 3	PDAC3 + Fento	PDAC3 + Fento + Toc	Angio breast	Angio breast + Fento	Angio breast + Fento + Toc	Lipo 2	Lipo 2 + Fento	Lipo 2 + Fento + Toc	Lipo 3	Lipo 3 + Fento	Lipo 3 + Fento + Toc	Lipo 4	Lipo 4 + Fento	Lipo 4 + Fento + Toc	Lipo 5	Lipo 5 + Fento	Lipo 5 + Fento + Toc	UPS	UPS + Fento	UPS + Fento + Toc			Quantification
###	Phosphatidylethanolamine			0	1	2	3	4	5	6	7	8	9	10	11	12	13	14	15	16	17	18	19	20	21	22	23	24	25	26	27	28	29	30			460.065	473.353	422.723	815.331	730.661	748.321	254.941	239.89	259.036	131.156	86.4825	89.4188	753.868
720.554	H79 C39 N1 O8 P1	0.15ppm	PE 34:0	5.49201e+06	7.02992e+06	5.91064e+06	7.20191e+06	5.96967e+06	5.63007e+06	6.26137e+06	6.63796e+06	6962664	6.36119e+06	1.84648e+06	1.98245e+06	2.03198e+06	8.14211e+06	6953030	8.15009e+06	4.58762e+06	3.79808e+06	4.06352e+06	6.29016e+06	8.06224e+06	9.32181e+06	7.97221e+06	7.83583e+06	8.18154e+06	3.93288e+06	3.33163e+06	3.2944e+06	3.89932e+06	3.47292e+06	3.68579e+06			1	2	3	4	5	6	7	8	9	10	11	12	13
692.523	H75 C37 N1 O8 P1	0.17ppm	PE 32:0	160938	320120	220864	320210	309390	248495	278669	240805	246645	260773	120563	126430	109909	859818	728273	924614	172339	128925	180100	280951	1.18969e+06	1.37749e+06	705551	677267	628274	0	55229.8	69976.6	241942	187298	213211		PE 32:0	2.27684	1.86836	2.22309	2.59135	2.20686	2.2253	1.81385	1.7712	2.04972	3.26467	3.18872	2.70449	5.28007
690.507	H73 C37 N1 O8 P1	-0.26ppm	PE 32:1	0	0	0	70743.3	224532	150184	264466	60638.8	62638.4	64964.8	20529	0	10682.4	923928	604610	728945	0	0	0	97982.8	268554	312348	621682	422709	631329	0	0	0	95882.8	90741.4	183895		PE 32:1	0	0	0.491143	1.88061	1.33377	2.11188	0.456757	0.449816	0.510634	0.555896	0	0.262857	5.67376
718.538	H77 C39 N1 O8 P1	0.15ppm	PE 34:1	0	2.63424e+06	2178104	2.65592e+06	6.01225e+06	5.07559e+06	6.13151e+06	1.60438e+06	1.62164e+06	1.55656e+06	206150	213653	213348	8412261	7.41722e+06	8.29521e+06	1.72831e+06	1365773	1.40597e+06	1.38398e+06	4.60204e+06	5.57521e+06	1.26323e+07	1.1634e+07	1.29823e+07	810690	570929	688910	2.19898e+06	2.1705e+06	2.45024e+06		PE 34:1	18.7359	18.4253	18.439	50.3566	45.0758	48.963	12.0849	11.6452	12.2348	5.58224	5.3886	5.24976	51.659
746.57	H81 C41 N1 O8 P1	0.24ppm	PE 36:1	0	8.97522e+06	7.73771e+06	8.24709e+06	2.34488e+07	20244813	2.25735e+07	5.73095e+06	5559589	5.575e+06	840225	941736	916183	1.65492e+07	1.40759e+07	1.64151e+07	7.32049e+06	5.72001e+06	5.68131e+06	2.9175e+06	1.21181e+07	1.42752e+07	2.19459e+07	2.16291e+07	2.29861e+07	4.12828e+06	3.84111e+06	4.1458e+06	1.03331e+07	9.85215e+06	1.09597e+07		PE 36:1	63.8358	65.4558	57.2563	196.399	179.792	180.26	43.168	39.9243	43.8204	22.7521	23.7518	22.5441	101.627
774.601	H85 C43 N1 O8 P1	-0.02ppm	PE 38:1	0	6.78303e+06	5.59191e+06	6.18915e+06	11899469	1.03779e+07	1.10112e+07	4.51254e+06	4.09608e+06	3.89305e+06	754213	725747	749115	8.24078e+06	6.98816e+06	8.04666e+06	4.93856e+06	3.98811e+06	4.00798e+06	2.00038e+06	1.02398e+07	11990700	1.18497e+07	1.16239e+07	1.17103e+07	3.89474e+06	4873701	4.8168e+06	4.70891e+06	4318114	4.53315e+06		PE 38:1	48.244	47.3038	42.9688	99.666	92.1649	87.9295	33.9904	29.4146	30.6	20.423	18.3043	18.4332	50.6059
802.632	H89 C45 N1 O8 P1	-0.06ppm	PE 40:1	0	1.06798e+06	884824	928952	1.88642e+06	1.6674e+06	1831563	663685	524823	612469	42978.1	42345.5	28436.5	890688	798802	915716	743497	696736	563658	343181	1.53192e+06	1.72238e+06	1.1872e+06	1.0369e+06	1.2115e+06	902351	980815	930673	409907	379195	483688		PE 40:1	7.59594	7.48502	6.44934	15.8001	14.808	14.6259	4.99916	3.76884	4.81411	1.16379	1.06801	0.699725	5.46963
830.663	H93 C47 N1 O8 P1	0.02ppm	PE 42:1	0	0	24662	0	175657	129065	128022	0	0	0	318479	333929	395173	582955	361399	525007	45333.2	0	0	71367.6	537161	601933	0	0	0	0	0	0	0	0	0		PE 42:1	0	0.208624	0	1.47124	1.14621	1.02232	0	0	0	8.62396	8.42212	9.72387	3.57988
744.554	H79 C41 N1 O8 P1	0.25ppm	PE 36:2	0	8.7824e+06	7.89072e+06	8.35533e+06	1.45009e+07	1.21921e+07	1.44534e+07	2.44084e+06	2.41433e+06	2.36729e+06	259196	229670	255562	11107732	9.72181e+06	1.05674e+07	6.55978e+06	5.21906e+06	5.17744e+06	3.57011e+06	1.16255e+07	13008323	2.67141e+07	2.59889e+07	2.85238e+07	2844227	2024468	2.52195e+06	4.48162e+06	4.16136e+06	4.72906e+06		PE 36:2	62.4644	66.7502	58.0077	121.455	108.276	115.418	18.3854	17.3377	18.6073	7.01867	5.79257	6.2885	68.2116
772.585	H83 C43 N1 O8 P1	-0.11ppm	PE 38:2	0	4.80233e+06	4.32683e+06	4.07949e+06	8.0694e+06	7.16177e+06	7579880	1.99632e+06	1.92445e+06	2.09052e+06	350224	334195	353340	5.54877e+06	4.45579e+06	5.31187e+06	4.00778e+06	3174989	3.23489e+06	2.21754e+06	8.42338e+06	9.15148e+06	1.18591e+07	1.14948e+07	1.21312e+07	2357944	2.47316e+06	2.47285e+06	3.4305e+06	3.17632e+06	3.16565e+06		PE 38:2	34.1563	36.6021	28.3223	67.5867	63.6029	60.5289	15.0372	13.8198	16.4318	9.48357	8.42883	8.6945	34.0745
800.616	H87 C45 N1 O8 P1	-0.30ppm	PE 40:2	0	1.56968e+06	1.46419e+06	1.34888e+06	4.1639e+06	3.62012e+06	3.90741e+06	738450	821566	699464	61558.1	34637.7	23638.7	1.66527e+06	1.2403e+06	1735322	1.05832e+06	913736	869826	500119	1.88328e+06	2.09431e+06	2.5818e+06	2.50864e+06	2.74873e+06	877166	999121	1.07304e+06	925831	878026	938992		PE 40:2	11.1643	12.3861	9.36475	34.8754	32.1499	31.2025	5.56232	5.89979	5.4979	1.66691	0.873609	0.581668	10.2263
828.648	H91 C47 N1 O8 P1	0.66ppm	PE 42:2	0	0	0	-1.8	362870	315551	365293	-1.8	0	0	21050.2	21584.4	79754.5	405564	416074	467840	56922.6	102606	69683.3	89201.5	499658	637639	3679.2	32740.8	-1.8	0	0	0	50049.3	0	9917.2		PE 42:2	0	0	-1.24967e-05	3.03928	2.80237	2.91704	-1.35584e-05	0	0	0.57001	0.544387	1.96249	2.49053
716.523	H75 C39 N1 O8 P1	0.30ppm	PE 34:2	0	1.17299e+06	1.0339e+06	1.22199e+06	1.73391e+06	1.39375e+06	1.70044e+06	489109	440985	413787	34731	50544.6	49962.8	2.3951e+06	2.22313e+06	2.38061e+06	1.00042e+06	648379	697798	371889	1.14884e+06	1.20445e+06	6.20958e+06	5514218	6.10002e+06	458470	268356	404577	762824	644447	796015		PE 34:2	8.34287	8.74608	8.48383	14.5226	12.3777	13.5788	3.68418	3.16678	3.25244	0.940466	1.2748	1.22941	14.7081
768.554	H79 C43 N1 O8 P1	-0.27ppm	PE 38:4	0	1.25845e+07	1.06493e+07	1.22889e+07	9.84363e+06	7.81655e+06	9.15122e+06	7.40993e+06	7.73162e+06	7.55714e+06	262185	73736.6	73113.7	2.43821e+07	2.08241e+07	2.35615e+07	7.15647e+06	5.5731e+06	5322429	914791	2.51231e+06	2.5744e+06	1.6792e+07	1.76343e+07	1.806e+07	1.36508e+06	1006426	1.19744e+06	5.95756e+06	5.66901e+06	6.63308e+06		PE 38:4	89.5068	90.0857	85.3169	82.447	69.418	73.0768	55.8148	55.522	59.4004	7.0996	1.85973	1.79908	149.728
766.538	H77 C43 N1 O8 P1	-0.08ppm	PE 38:5	0	3855631	3.20353e+06	3.62931e+06	2.05071e+06	1.76375e+06	1.99264e+06	1.60698e+06	1.59092e+06	1.61479e+06	91373.4	13340.2	57547.2	7.57966e+06	6.41562e+06	7.50117e+06	1.28118e+06	1.00639e+06	1.08668e+06	411352	1.49072e+06	1.51291e+06	5.81319e+06	5.51155e+06	5.64686e+06	541110	164457	363664	1.48436e+06	1.40725e+06	1.76197e+06		PE 38:5	27.423	27.0997	25.1969	17.1761	15.6637	15.9121	12.1045	11.4246	12.6925	2.47426	0.336457	1.41604	46.546
764.522	H75 C43 N1 O8 P1	-0.17ppm	PE 38:6	0	698275	641098	599485	693660	484022	668654	399930	372778	346473	0	0	0	2.96745e+06	2.81113e+06	3.1042e+06	518896	440576	285352	134364	399881	488171	1.19252e+06	1.08718e+06	1.10638e+06	0	0	43833.8	543793	482374	583124		PE 38:6	4.96645	5.42326	4.16199	5.80987	4.29855	5.33952	3.01245	2.67698	2.72333	0	0	0	18.2229
742.538	H77 C41 N1 O8 P1	-0.18ppm	PE 36:3	276776	3.01293e+06	2.74536e+06	3.06706e+06	2605143	2.23155e+06	2.71194e+06	623986	676800	640682	481279	108565	140057	2.78886e+06	2.47534e+06	2.68071e+06	1562797	1208963	1.1867e+06	3.14233e+06	3.51234e+06	3.73483e+06	9.50587e+06	8.8394e+06	9.84122e+06	728588	532104	593193	1159873	1.11367e+06	1.21557e+06		PE 36:3	21.4293	23.2239	21.2934	21.8198	19.8181	21.6561	4.70013	4.86021	5.03587	13.0324	2.73815	3.44633	17.1261
714.507	H73 C39 N1 O8 P1	0.01ppm	PE 34:3	0	0	0	0	0	44721.5	71994.4	13021.7	0	15497.5	0	0	13266.8	77739.9	77144.2	58212.6	0	0	0	0	51942.7	15481.9	119224	110366	84224.2	0	0	0	0	0	0		PE 34:3	0	0	0	0	0.397167	0.574909	0.098085	0	0.121813	0	0	0.326451	0.477394
794.569	H81 C45 N1 O8 P1	-0.03ppm	PE 40:5	78190.4	1.90847e+06	1.71338e+06	1.692e+06	1723128	1.24505e+06	1.51871e+06	1.35739e+06	1.27534e+06	1.28053e+06	136302	20116.3	0	7.32081e+06	6.2923e+06	6.9469e+06	1180020	894020	911979	367490	1.2345e+06	1424913	3.32947e+06	3.37484e+06	3590348	385466	272942	395734	1.38673e+06	1.27288e+06	1.56472e+06		PE 40:5	13.5739	14.494	11.7469	14.4324	11.0572	12.1276	10.2244	9.15843	10.0651	3.69088	0.50736	0	44.9564
792.553	H79 C45 N1 O8 P1	-0.44ppm	PE 40:6	422424	1249132	1.14972e+06	1.27897e+06	1.7219e+06	1.37655e+06	1450766	824263	940070	888373	234392	0	0	7.02313e+06	5.70418e+06	6.19131e+06	1.65519e+06	1.25362e+06	1.1948e+06	437104	1.14212e+06	1083421	2.26939e+06	2.17507e+06	2.18816e+06	137229	186100	255389	1.19858e+06	1.15521e+06	1347301		PE 40:6	8.88439	9.72582	8.87941	14.4221	12.225	11.585	6.2087	6.75079	6.98276	6.34701	0	0	43.1284
790.538	H77 C45 N1 O8 P1	-0.42ppm	PE 40:7	11805.7	419658	390260	513130	464852	367105	530086	264074	286786	345016	0	0	0	2.67975e+06	2.0297e+06	2.22364e+06	278406	266609	184336	76102.9	193006	224459	1.57561e+06	1355196	1.56481e+06	0	0	0	343835	373040	503664		PE 40:7	2.9848	3.30134	3.56246	3.89345	3.26022	4.23299	1.98912	2.05946	2.71188	0	0	0	16.4561
788.522	H75 C45 N1 O8 P1	-0.34ppm	PE 40:8	0	0	0	0	36687.2	50049	33974.2	0	0	0	0	0	0	240638	82027.3	283003	0	0	0	0	0	0	0	0	0	0	0	0	0	0	0		PE 40:8	0	0	0	0.30728	0.44448	0.2713	0	0	0	0	0	0	1.47774
740.522	H75 C41 N1 O8 P1	-0.05ppm	PE 36:4	0	1544682	1.24058e+06	1.58506e+06	1.28353e+06	988559	1.31915e+06	781964	847957	824504	23436	0	14496.9	4.49293e+06	3.70744e+06	4.62413e+06	861597	586567	638411	165309	477845	629019	2.49057e+06	2.6166e+06	2.83204e+06	134238	74481.4	101214	798822	819788	1.00787e+06		PE 36:4	10.9865	10.4944	11.0045	10.7504	8.77928	10.534	5.89009	6.08932	6.48074	0.634614	0	0.356719	27.5907
770.569	H81 C43 N1 O8 P1	-0.22ppm	PE 38:3	0	2.09042e+06	1.78588e+06	1.77784e+06	2.76952e+06	2.22432e+06	2.76722e+06	1.23548e+06	1.16394e+06	1.04623e+06	567115	123997	131502	3.40097e+06	2.98134e+06	3.31763e+06	1.196e+06	1.02642e+06	1.00801e+06	3.0045e+06	3.21163e+06	3.77537e+06	8.87481e+06	8.77102e+06	9.20376e+06	542588	434390	586607	1.19334e+06	1.06691e+06	1344888		PE 38:3	14.868	15.1074	12.3428	23.1965	19.7539	22.0976	9.30618	8.35842	8.22358	15.3567	3.12738	3.23582	20.8851
826.632	H89 C47 N1 O8 P1	0.00ppm	PE 42:3	0	239683	210181	179706	410714	319329	360004	154875	174736	171626	0	12805.4	0	456917	435909	523717	146057	0	51917.7	16254.4	237660	291005	530666	417063	448983	116084	227996	271590	0	52192.8	53718.9		PE 42:3	1.70473	1.77799	1.24763	3.44	2.83593	2.8748	1.16658	1.25481	1.34901	0	0.322969	0	2.80589
824.616	H87 C47 N1 O8 P1	0.12ppm	PE 42:4	0	973078	873322	859009	954289	785123	908631	696128	631793	690819	17558.8	21914.8	18847.5	1.76866e+06	1.54324e+06	1.69798e+06	356348	410566	261570	90534.7	331216	361606	875445	974250	946425	161582	401538	339241	693888	648192	727719		PE 42:4	6.92098	7.38772	5.96376	7.99281	6.97259	7.25584	5.24353	4.53701	5.42995	0.475467	0.55272	0.463773	10.8612
###	PhosphatidylethanolamineOx																																				0	0	0	0	0	0	0	0	0	0	0	0	0
820.642	H91 C45 N1 O9 P1	-0.62ppm	PEOx 40:0	0	0	0	0	0	0	0	0	0	0	0	16995.7	20060.2	0	0	0	0	0	0	0	0	0	0	0	0	0	0	0	0	0	0		PEOx 40:0	0	0	0	0	0	0	0	0	0	0	0.428654	0.493613	0
790.596	H85 C43 N1 O9 P1	0.62ppm	PEOx 38:1	0	0	0	0	0	0	0	0	0	0	0	0	0	0	0	0	0	0	0	30528.6	0	0	0	0	0	0	0	0	43053.2	69590.8	77853.4		PEOx 38:1	0	0	0	0	0	0	0	0	0	0	0	0	0
818.627	H89 C45 N1 O9 P1	-0.47ppm	PEOx 40:1	0	0	0	0	0	0	0	0	0	0	0	0	0	0	0	0	0	0	0	0	0	0	0	0	0	0	0	0	0	0	0		PEOx 40:1	0	0	0	0	0	0	0	0	0	0	0	0	0
846.659	H93 C47 N1 O9 P1	0.40ppm	PEOx 42:1	0	0	0	0	0	0	0	0	0	0	0	0	0	0	0	0	0	0	0	0	0	0	0	0	0	0	0	0	0	0	0		PEOx 42:1	0	0	0	0	0	0	0	0	0	0	0	0	0
788.58	H83 C43 N1 O9 P1	0.36ppm	PEOx 38:2	0	0	0	0	0	0	0	0	48198.3	0	146932	0	0	0	0	0	0	0	0	1267704	792457	1.24923e+06	0	0	0	110335	123843	134145	996335	866343	817490		PEOx 38:2	0	0	0	0	0	0	0	0.34612	0	3.9787	0	0	0
816.611	H87 C45 N1 O9 P1	-0.84ppm	PEOx 40:2	0	0	0	0	0	0	25427.8	0	0	0	120747	0	0	0	0	0	0	0	0	215735	78358.1	215092	0	0	0	0	0	0	108132	158184	74095.8		PEOx 40:2	0	0	0	0	0	0.203053	0	0	0	3.26966	0	0	0
844.644	H91 C47 N1 O9 P1	1.88ppm	PEOx 42:2	0	0	0	0	0	0	0	0	0	0	0	0	0	0	0	0	0	0	0	0	0	0	0	0	0	0	0	0	0	0	0		PEOx 42:2	0	0	0	0	0	0	0	0	0	0	0	0	0
756.518	H75 C41 N1 O9 P1	0.57ppm	PEOx 36:4	0	0	0	0	0	57312.1	0	0	41398.1	0	13258.5	0	0	0	0	0	0	0	0	0	0	0	0	0	0	0	0	0	42841.6	80370.3	31274.4		PEOx 36:4	0	0	0	0	0.508982	0	0	0.297286	0	0.359021	0	0	0
754.501	H73 C41 N1 O9 P1	-0.35ppm	PEOx 36:5	0	0	0	0	0	0	0	0	0	0	0	0	0	0	0	0	0	0	0	0	0	0	0	0	0	0	0	0	0	0	0		PEOx 36:5	0	0	0	0	0	0	0	0	0	0	0	0	0
698.438	H65 C37 N1 O9 P1	-0.86ppm	PEOx 32:5	0	0	0	0	21678.6	0	23826.8	0	0	0	0	16046.7	30737.4	0	0	0	0	0	0	0	0	0	0	0	0	0	0	0	0	0	0		PEOx 32:5	0	0	0	0.181573	0	0.190268	0	0	0	0	0.404719	0.756343	0
760.549	H79 C41 N1 O9 P1	0.92ppm	PEOx 36:2	0	0	0	0	0	0	0	0	0	0	0	0	0	0	0	0	0	0	0	2.65595e+06	3.45264e+06	1.64738e+06	0	0	0	17278.4	504444	78532.7	0	0	0		PEOx 36:2	0	0	0	0	0	0	0	0	0	0	0	0	0
786.565	H81 C43 N1 O9 P1	0.27ppm	PEOx 38:3	10397.7	0	0	0	0	0	0	0	0	0	34468.6	36283.3	47947.1	0	0	0	0	0	0	1.13414e+06	2.66908e+06	1.18267e+06	0	0	0	393858	758704	669258	0	0	0		PEOx 38:3	0	0	0	0	0	0	0	0	0	0.933361	0.915113	1.17981	0
784.549	H79 C43 N1 O9 P1	0.20ppm	PEOx 38:4	22747.8	0	0	0	0	340442	180293	73016.8	181854	25702.6	39004.6	10937.7	49405.2	0	0	0	0	0	0	95901.9	0	0	0	0	0	199311	436293	285870	391489	386630	71744.3		PEOx 38:4	0	0	0	0	3.02342	1.43972	0.549994	1.30592	0.202027	1.05619	0.275863	1.21569	0
782.534	H77 C43 N1 O9 P1	0.53ppm	PEOx 38:5	0	254420	294137	245557	897553	1.09466e+06	821253	868220	1055196	781324	44021.5	0	38522.4	228657	289599	0	278470	380717	481244	490552	0	0	0	0	0	306190	352474	315518	1.59937e+06	1690795	1.49587e+06		PEOx 38:5	1.80955	2.4882	1.7048	7.5176	9.72159	6.55809	6.5398	7.57753	6.14133	1.19204	0	0.947905	1.40416
780.517	H75 C43 N1 O9 P1	-0.43ppm	PEOx 38:6	0	0	0	0	0	73185	0	24908.6	50380.2	0	0	0	0	0	0	0	0	0	0	0	0	0	0	0	0	48570.6	231071	192994	120737	77179.2	100611		PEOx 38:6	0	0	0	0	0.649948	0	0.187622	0.361788	0	0	0	0	0
778.501	H73 C43 N1 O9 P1	-0.60ppm	PEOx 38:7	0	0	0	0	0	33912.2	0	0	47081.8	0	157424	793072	702648	0	0	0	0	0	0	0	0	0	0	0	0	0	0	0	0	0	0		PEOx 38:7	0	0	0	0	0.30117	0	0	0.338102	0	4.26281	20.0023	17.2898	0
700.455	H67 C37 N1 O9 P1	-0.14ppm	PEOx 32:4	0	0	0	0	0	0	0	84954.6	18104.5	0	0	0	0	0	0	0	0	0	0	0	0	0	0	0	0	0	0	0	0	0	15635.2		PEOx 32:4	0	0	0	0	0	0	0.639915	0.130011	0	0	0	0	0
730.502	H73 C39 N1 O9 P1	0.00ppm	PEOx 34:3	0	0	0	0	0	24502.8	0	0	0	0	0	0	0	0	0	0	0	0	0	0	0	0	0	0	0	0	0	0	0	0	0		PEOx 34:3	0	0	0	0	0.217607	0	0	0	0	0	0	0	0
758.533	H77 C41 N1 O9 P1	0.46ppm	PEOx 36:3	0	0	0	0	0	0	0	0	0	0	16810.3	19142.4	61664.6	0	0	0	0	0	0	87828.4	0	0	0	0	0	967228	1441170	1.25239e+06	0	0	0		PEOx 36:3	0	0	0	0	0	0	0	0	0	0.455199	0.482797	1.51736	0
814.595	H85 C45 N1 O9 P1	-0.27ppm	PEOx 40:3	0	0	0	0	0	0	2815.7	0	0	0	122492	435608	0	0	0	0	0	0	0	293901	542920	273137	0	0	24272.3	0	0	0	57341.1	132157	65207.3		PEOx 40:3	0	0	0	0	0	0.0224847	0	0	0	3.3169	10.9866	0	0
812.58	H83 C45 N1 O9 P1	0.03ppm	PEOx 40:4	0	45823.4	26300.8	34480.4	94491.7	146156	149238	36900.9	61146.3	25558.2	125819	0	0	61255	71217.1	0	0	0	0	137042	62347.3	139803	0	0	0	0	0	0	524939	433772	528924		PEOx 40:4	0.325917	0.222487	0.239384	0.791431	1.29799	1.19173	0.277953	0.439101	0.200892	3.407	0	0	0.376162
810.565	H81 C45 N1 O9 P1	0.30ppm	PEOx 40:5	0	722890	733433	399537	756909	1.01933e+06	735954	768052	1.02269e+06	827843	92507.9	0	29259.4	151070	339158	0	276413	607832	655376	106646	393690	422997	0	88945.1	103239	48452	93411.1	177967	1.79459e+06	1.795e+06	1.73273e+06		PEOx 40:5	5.14152	6.20435	2.77383	6.33962	9.05256	5.87694	5.7853	7.34409	6.50699	2.50498	0	0.719974	0.927711
808.548	H79 C45 N1 O9 P1	-0.24ppm	PEOx 40:6	0	487661	232781	185421	528939	558318	364385	597502	698790	562616	40011.1	53530.7	86482.3	199462	217740	158605	365577	285234	369301	287482	356303	164288	157655	195132	108676	181030	346141	389316	726467	742155	703221		PEOx 40:6	3.46847	1.96917	1.28731	4.43022	4.95836	2.90979	4.50064	5.01812	4.42226	1.08344	1.35011	2.12803	1.22488
806.533	H77 C45 N1 O9 P1	-0.15ppm	PEOx 40:7	0	29658.9	84049.2	82450.5	205074	175800	232806	56522	182168	135763	56044.2	94274.6	71780.9	70939.7	73952.2	96721.2	101409	98921.6	67738	85110.7	0	0	0	50420.6	0	0	122778	120531	293344	346827	262446		PEOx 40:7	0.210948	0.711	0.572421	1.71763	1.56126	1.85907	0.425748	1.30817	1.06712	1.5176	2.37773	1.76628	0.435634
728.486	H71 C39 N1 O9 P1	-0.07ppm	PEOx 34:4	0	0	0	0	0	0	0	0	0	0	0	0	0	0	0	0	0	0	0	0	0	0	0	0	0	0	0	0	0	0	0		PEOx 34:4	0	0	0	0	0	0	0	0	0	0	0	0	0
702.471	H69 C37 N1 O9 P1	0.04ppm	PEOx 32:3	0	0	0	0	0	0	0	28823	53619.2	0	22015.7	0	0	0	0	0	0	0	0	0	0	0	0	0	0	0	0	0	0	0	0		PEOx 32:3	0	0	0	0	0	0	0.217107	0.385048	0	0.596154	0	0	0
842.627	H89 C47 N1 O9 P1	-0.40ppm	PEOx 42:3	0	0	0	0	0	0	0	0	0	0	121239	438181	91023	0	87357.5	114035	0	0	0	20322.5	34336.7	16846.3	0	0	0	0	0	0	100985	98717.4	55944.1		PEOx 42:3	0	0	0	0	0	0	0	0	0	3.28298	11.0515	2.23977	0
840.611	H87 C47 N1 O9 P1	-0.21ppm	PEOx 42:4	0	0	0	0	0	0	0	0	0	0	150206	148000	184381	0	0	0	0	0	0	0	0	16283.8	0	0	0	0	-1.8	0	151511	151738	48599.7		PEOx 42:4	0	0	0	0	0	0	0	0	0	4.06738	3.73277	4.53698	0
838.594	H85 C47 N1 O9 P1	-1.74ppm	PEOx 42:5	281220	0	0	29305.9	48466.7	90371.8	0	42526.8	182293	73694.3	40471.4	18537.5	0	115811	134485	75878.2	0	0	0	149834	103110	22824.9	0	0	0	1.13994e+06	334176	0	390639	420754	388380		PEOx 42:5	0	0	0.203459	0.405941	0.802582	0	0.32033	1.30907	0.57925	1.09591	0.46754	0	0.711183
836.579	H83 C47 N1 O9 P1	-0.84ppm	PEOx 42:6	0	0	0	0	27873.4	131621	91375.7	75716.3	150693	124768	68748.3	25902.9	16057.1	62786.9	0	58108.7	0	0	25474.4	174644	47279.1	211298	0	39486.6	0	45503.9	34651.1	61370.8	411298	354652	450670		PEOx 42:6	0	0	0	0.233458	1.16891	0.729678	0.570328	1.08215	0.980698	1.86161	0.653305	0.39511	0.385569
834.564	H81 C47 N1 O9 P1	-0.21ppm	PEOx 42:7	0	0	0	0	68662.4	33812.6	43668.1	42812.8	58040.7	66537.9	0	12130.3	0	0	89108.5	40110.1	0	62904.2	0	31726.3	0	0	0	0	0	45379.5	0	0	109350	242170	183833		PEOx 42:7	0	0	0	0.575094	0.300286	0.34871	0.322484	0.4168	0.522999	0	0.305942	0	0
832.547	H79 C47 N1 O9 P1	-1.58ppm	PEOx 42:8	0	29333.3	34560.3	27314.6	121068	36069.2	90625	157270	141566	161490	20978.8	0	0	0	0	0	31274.6	31158.6	0	48166	0	0	0	0	0	0	30549.2	64052.5	173716	111654	79673.8		PEOx 42:8	0.208632	0.292357	0.189634	1.01402	0.320327	0.723683	1.18463	1.01661	1.26934	0.568076	0	0	0
###	PhosphatidylethanolamineOx2
780.575	H83 C41 N1 O10 P1	0.14ppm	PEOx2 36:0	0	259768	430148	220681	0	0	37810.5	20197.7	0	31634.7	40888.8	59293.4	44288.8	152881	73440.9	0	0	68149.5	0	0	0	0	0	0	0	45086.1	87415.2	118449	234203	212619	132359		PEOx2 36:0	1.84759	3.63876	1.5321	0	0	0.301935	0.152138	0	0.248654	1.10721	1.49546	1.0898	0.938828
806.59	H85 C43 N1 O10 P1	-0.33ppm	PEOx2 38:1	0	181373	314835	135849	43343.9	106402	65380.9	559222	602626	580971	104225	331504	103991	32349.3	58342.3		309609	448728	376528	0	0	0	0	0	0	781030	881882	862762	0	0	0		PEOx2 38:1	1.29001	2.66329	0.943147	0.363034	0.944941	0.522097	4.2123	4.32755	4.56653	2.82225	8.36097	2.55887	0.198654
804.576	H83 C43 N1 O10 P1	0.76ppm	PEOx2 38:2	0	287986	345319	67343.7	842524	944915	892285	64695.8	389223	163084	94606.4	101842	129477	616159	460101	468781	48583.2	215335	106393	0	317261	424148	435199	481846	368071	52100.2	445023	412351	1.35387e+06	1.28558e+06	1.21726e+06		PEOx2 38:2	2.04828	2.92117	0.467541	7.05671	8.39169	7.12531	0.487317	2.79507	1.28187	2.56181	2.56858	3.18599	3.78378
860.638	H91 C47 N1 O10 P1	0.02ppm	PEOx2 42:2	43098.1	0	0	0	19793	0	0	0	0	0	205890	0	15015.9	0	0	0	0	0	0	0	530248	648073	0	0	0	0	0	0	0	0	0		PEOx2 42:2	0	0	0	0.16578	0	0	0	0	0	5.5752	0	0.36949	0
776.544	H79 C41 N1 O10 P1	0.39ppm	PEOx2 36:2	0	77560.9	75838.3	0	218794	397277	255423	0	131617	0	34554.7	76551.5	0	148982	105289	156425	53466.6	20090.7	53861.8	34690.6	422523	473306	390099	217940	341849	0	112938	0	308863	371273	295920		PEOx2 36:2	0.551648	0.641541	0	1.83255	3.52817	2.03967	0	0.945164	0	0.935692	1.93073	0	0.914884
774.529	H77 C41 N1 O10 P1	0.97ppm	PEOx2 36:3	127874	41875.4	37292.5	0	40509.6	113574	0	0	0	0	380520	392700	485576	0	0	0	0	0	0	0	17349.5	0	68583.3	80967.5	47866.3	50145.9	0	0	126097	175537	128979		PEOx2 36:3	0.297837	0.315469	0	0.339295	1.00864	0	0	0	0	10.304	9.90442	11.9484	0
772.513	H75 C41 N1 O10 P1	0.70ppm	PEOx2 36:4	0	0	0	0	0	24706.5	0	0	61054.1	0	107815	106439	130010	0	0	0	0	0	0	0	0	0	0	0	0	0	0	0	29238.7	0	14742.2		PEOx2 36:4	0	0	0	0	0.219416	0	0	0.438439	0	2.91947	2.68454	3.19912	0
798.528	H77 C43 N1 O10 P1	0.27ppm	PEOx2 38:5	0	0	25843.8	0	140977	173943	44200	141072	244478	64730.2	307578	361846	450505	86674.8	160326	140865	0	0	0	0	0	0	0	0	39318.1	0	0	20857.1	273612	214891	200361		PEOx2 38:5	0	0.218621	0	1.18078	1.54477	0.352958	1.06262	1.75564	0.50879	8.32876	9.12624	11.0854	0.532262
796.512	H75 C43 N1 O10 P1	-0.62ppm	PEOx2 38:6	0	0	0	0	0	21806.9	0	29304.1	79749.5	29967.6	0	0	0	0	0	0	0	0	0	0	0	0	0	0	0	0	0	0	19174.1	42816.3	0		PEOx2 38:6	0	0	0	0	0.193665	0	0.220731	0.572694	0.23555	0	0	0	0
830.59	H85 C45 N1 O10 P1	-1.30ppm	PEOx2 40:3	76402.6	0	22691.4	22592.4	43443.6	45326.3	69444.7	7372.5	16211.9	0	73486.6	142993	190081	0	0	0	0	0	0	124400	307419	180394	10883.4	17985.5	28680.7	47215.7	0	0	68984	35275.3	50365.6		PEOx2 40:3	0	0.191954	0.15685	0.363869	0.402538	0.554549	0.0555328	0.11642	0	1.98991	3.60647	4.67724	0
828.575	H83 C45 N1 O10 P1	0.48ppm	PEOx2 40:4	0	106159	91850.8	0	176677	249967	116408	220734	179005	130454	563042	696200	916394	166565	255815	147518	0	0	0	37401.7	0	0	188663	174092	149982	0	110843	64697.1	330725	407076	189805		PEOx2 40:4	0.755052	0.776996	0	1.47979	2.21993	0.929575	1.66266	1.28547	1.02539	15.2464	17.5591	22.5493	1.02286
826.559	H81 C45 N1 O10 P1	0.19ppm	PEOx2 40:5	0	765524	697723	558474	439138	469761	359251	527814	660050	522904	219511	335805	419888	293918	928313	688451	268574	299689	244303	37226.5	0	0	292313	358200	240240	212575	354760	143134	1.06638e+06	990923	934670		PEOx2 40:5	5.44475	5.90227	3.87726	3.67807	4.17189	2.86879	3.97572	4.73993	4.11011	5.94406	8.46945	10.332	1.80493
824.543	H79 C45 N1 O10 P1	-0.65ppm	PEOx2 40:6	0	223279	131312	96689.8	174072	131731	160722	171775	195238	98143.6	58625.8	142468	140020	171045	397084	177660	43005.6	56734	0	45194.9	0	0	76971.8	60243.1	75880.3	0	106256	148991	438665	348720	355447		PEOx2 40:6	1.58806	1.11081	0.671279	1.45797	1.16989	1.28344	1.29388	1.40203	0.771425	1.5875	3.59324	3.4454	1.05037
822.527	H77 C45 N1 O10 P1	-1.27ppm	PEOx2 40:7	71256.6	0	0	0	0	0	0	0	0	30351.1	21619.9	0	0	0	0	0	0	0	0	0	0	0	0	0	0	0	0	0	22773.5	31310.1	19217		PEOx2 40:7	0	0	0	0	0	0	0	0	0.238565	0.585436	0	0	0
820.512	H75 C45 N1 O10 P1	-0.62ppm	PEOx2 40:8	0	0	42963.5	0	0	0	0	0	62828.9	0	0	51876	0	0	0	0	0	0	0	0	0	0	0	0	0	0	0	0	0	40449.5	0		PEOx2 40:8	0	0.363442	0	0	0	0	0	0.451184	0	0	1.30838	0	0
770.497	H73 C41 N1 O10 P1	-0.09ppm	PEOx2 36:5	0	0	0	0	0	0	0	0	0	0	0	99574.3	0	0	0	0	0	0	0	0	0	0	0	0	0	0	0	0	0	0	0		PEOx2 36:5	0	0	0	0	0	0	0	0	0	0	2.5114	0	0
858.622	H89 C47 N1 O10 P1	0.44ppm	PEOx2 42:3	0	0	0	0	0	0	0	0	0	0	73807.4	0	40064.6	0	0	0	0	0	0	0	0	53120.7	0	0	0	0	0	0	0	0	0		PEOx2 42:3	0	0	0	0	0	0	0	0	0	1.9986	0	0.985853	0
854.591	H85 C47 N1 O10 P1	0.15ppm	PEOx2 42:5	0	0	0	0	38076.1	56362.2	24075.4	70667.4	78145.4	34493.8	37810.6	98978.9	27902.7	205673	368017	143730	0	0	0	0	0	0	0	0	0	0	0	47345.7	194500	92178.6	187968		PEOx2 42:5	0	0	0	0.318913	0.500546	0.192253	0.532297	0.561175	0.271127	1.02386	2.49638	0.68659	1.26302
852.575	H83 C47 N1 O10 P1	0.12ppm	PEOx2 42:6	0	0	46115.4	0	61528.9	81278.8	97609.9	113909	85111.8	245859	79419.7	0	0	272027	280478	212822	0	0	0	0	0	0	0	0	0	277154	189745	404487	340160	288465	281923		PEOx2 42:6	0	0.390105	0	0.515346	0.721828	0.779461	0.858015	0.611201	1.93249	2.15057	0	0	1.6705
850.559	H81 C47 N1 O10 P1	0.02ppm	PEOx2 42:7	0	0	0	0	28527	25517.5	34504	60695.2	28291	26603.1	48808.4	83872.9	104602	187082	232150	227673	0	54498.8	0	0	0	0	38930.8	0	0	0	0	0	137242	229070	82551.5		PEOx2 42:7	0	0	0	0.238933	0.226618	0.275531	0.457182	0.203162	0.209105	1.32166	2.11539	2.57389	1.14886
848.542	H79 C47 N1 O10 P1	-1.77ppm	PEOx2 42:8	0	0	0	0	0	0	0	57539.6	47877.2	60966.1	0	0	0	60990	0	46491.3	0	0	0	0	0	0	0	0	0	0	40095.9	0	56381.6	42621	30217.7		PEOx2 42:8	0	0	0	0	0	0	0.433413	0.343814	0.479204	0	0	0	0.374534
###	PhosphatidylethanolamineOx3
788.508	H75 C41 N1 O11 P1	1.54ppm	PEOx3 36:4	0	0	0	0	0	0	0	0	14708.3	0	625126	626818	814390	0	0	0	0	0	0	0	0	0	0	0	0	0	0	0	0	0	0		PEOx3 36:4	0	0	0	0	0	0	0	0.105623	0	16.9275	15.8092	20.0394	0
816.539	H79 C43 N1 O11 P1	0.74ppm	PEOx3 38:4	0	0	0	0	0	16867.9	0	26928.5	47135.1	0	22267939	2.61061e+07	3.32959e+07	0	0	0	0	0	0	0	0	0	0	0	0	0	0	0	0	0	0		PEOx3 38:4	0	0	0	0	0.149802	0	0.202837	0.338485	0	602.984	658.43	819.298	0
814.524	H77 C43 N1 O11 P1	1.17ppm	PEOx3 38:5	0	0	0	0	0	0	0	28525.9	0	0	5.83857e+06	6.86947e+06	8.81677e+06	0	0	0	0	0	0	0	0	0	0	0	0	0	0	0	0	18025.4	0		PEOx3 38:5	0	0	0	0	0	0	0.214869	0	0	158.1	173.257	216.951	0
812.508	H75 C43 N1 O11 P1	0.85ppm	PEOx3 38:6	0	0	0	0	0	0	0	21765.8	0	0	184647	237547	295272	0	0	0	0	0	0	0	0	0	0	0	0	0	0	0	19501.7	0	0		PEOx3 38:6	0	0	0	0	0	0	0.163949	0	0	4.99998	5.99126	7.26563	0
844.571	H83 C45 N1 O11 P1	1.48ppm	PEOx3 40:4	0	0	0	0	0	0	0	0	28576.2	0	1.21863e+07	1.5251e+07	1.85264e+07	0	0	0	0	0	0	0	0	0	0	0	0	0	0	0	0	17184.1	0		PEOx3 40:4	0	0	0	0	0	0	0	0.20521	0	329.987	384.649	455.87	0
842.556	H81 C45 N1 O11 P1	1.61ppm	PEOx3 40:5	0	0	0	0	0	0	0	0	0	0	5.59174e+06	6.77756e+06	8.5432e+06	0	0	0	0	0	0	0	0	0	0	0	0	0	0	0	0	0	0		PEOx3 40:5	0	0	0	0	0	0	0	0	0	151.416	170.939	210.219	0
840.54	H79 C45 N1 O11 P1	1.58ppm	PEOx3 40:6	0	0	0	0	0	0	0	0	30017.8	0	1.77232e+06	2.06107e+06	2.60079e+06	0	0	0	0	0	330888	0	0	0	0	0	0	0	0	0	0	0	0		PEOx3 40:6	0	0	0	0	0	0	0	0.215563	0	47.992	51.9828	63.9967	0
836.508	H75 C45 N1 O11 P1	1.14ppm	PEOx3 40:8	0	0	0	0	0	0	0	0	0	0	12819.1	75520.1	92378.5	0	0	0	0	0	0	15767.3	0	0	0	0	0	0	0	0	0	0	0		PEOx3 40:8	0	0	0	0	0	0	0	0	0	0.347123	1.90472	2.27312	0
###	PhosphatidylethanolamineOx4
866.613	H89 C45 N1 O12 P1	1.61ppm	PEOx4 40:1	0	0	0	0	0	0	0	0	42574	0	56510.7	63769.9	48756.5	0	0	0	0	0	0	0	0	0	0	0	0	62517.9	0	0	269106	300165	190591		PEOx4 40:1	0	0	0	0	0	0	0	0.305731	0	1.53023	1.60836	1.19973	0
828.504	H75 C43 N1 O12 P1	1.72ppm	PEOx4 38:6	0	0	0	0	0	34318	0	0	43332.2	0	313096	694240	603662	0	0	0	0	0	0	0	0	22093.4	0	0	0	0	0	0	0	0	0		PEOx4 38:6	0	0	0	0	0.304774	0	0	0.311175	0	8.4782	17.5097	14.8541	0
854.518	H77 C45 N1 O12 P1	0.05ppm	PEOx4 40:7	0	0	0	0	0	0	0	0	0	0	253153	404659	585239	0	0	0	0	0	0	0	0	0	0	0	0	0	0	0	0	0	0		PEOx4 40:7	0	0	0	0	0	0	0	0	0	6.85502	10.206	14.4007	0
888.597	H87 C47 N1 O12 P1	0.74ppm	PEOx4 42:4	0	0	0	0	0	0	0	0	0	0	133819	151582	142384	0	0	0	0	0	0	0	0	0	0	0	0	0	0	0	0	53986.6	0		PEOx4 42:4	0	0	0	0	0	0	0	0	0	3.62362	3.82309	3.50359	0
###	PhosphatidylethanolamineOx5
854.576	H85 C43 N1 O13 P1	0.77ppm	PEOx5 38:1	0	0	0	0	0	0	0	0	0	25764.5	137182	134955	236847	0	0	0	0	0	0	0	302064	255810	213462	280842	112344	0	0	0	0	0	0		PEOx5 38:1	0	0	0	0	0	0	0	0	0.202513	3.7147	3.40373	5.828	0
882.606	H89 C45 N1 O13 P1	-0.42ppm	PEOx5 40:1	0	0	0	0	0	0	30711.2	0	0	0	181740	142800	224973	0	0	43753.9	75546.6	0	0	0	56805.5	34753	0	69262.6	0	0	0	0	81409.1	89500.6	64777.4		PEOx5 40:1	0	0	0	0	0	0.245243	0	0	0	4.92126	3.6016	5.53583	0
876.56	H83 C45 N1 O13 P1	0.37ppm	PEOx5 40:4	0	0	0	0	0	0	0	0	0	0	0	0	51498.3	0	0	118294	0	0	0	0	0	22831.4	59939.9	0	44705.7	0	0	0	55123.8	36186.5	0		PEOx5 40:4	0	0	0	0	0	0	0	0	0	0	0	1.2672	0
906.607	H89 C47 N1 O13 P1	0.19ppm	PEOx5 42:3	0	0	0	24845.2	0	0	0	0	0	0	60688.2	16007.8	107305	91139.2	48785.5	300887	0	0	0	0	213698	369348	594738	734254	469816	0	0	0	196295	151583	136161		PEOx5 42:3	0	0	0.17249	0	0	0	0	0	0	1.64335	0.403738	2.64042	0.559678
904.591	H87 C47 N1 O13 P1	-0.15ppm	PEOx5 42:4	0	1.04543e+06	1.13014e+06	1.73616e+06	34258.7	0	191646	432418	103593	0	255490	338708	428186	2.24129e+06	1437161	3356323	1.48879e+06	1.62575e+06	543183	14455.4	559067	611330	2.33409e+06	3.56214e+06	2.05146e+06	99240.5	0	0	1.85005e+06	4.06183e+06	1.73106e+06		PEOx5 42:4	7.43561	9.56021	12.0535	0.28694	0	1.53038	3.25716	0.743918	0	6.91831	8.54265	10.5362	13.7635
902.576	H85 C47 N1 O13 P1	0.38ppm	PEOx5 42:5	0	55761.1	0	202540	0	0	0	0	0	0	0	44053	17680.8	205995	104266	250528	42783.5	0	0	0	426032	448925	286795	108338	212172	0	0	0	66414.2	96796.8	163115		PEOx5 42:5	0.396598	0	1.40616	0	0	0	0	0	0	0	1.11107	0.435064	1.265
[truncated: 47 more columns]

## Sheet: LPE
																																				Normalization
###	LPE				Lipo 1	Lipo 1 + Fento	Lipo 1 + Fento + Toc	PDAC 1	PDAC1 + Fento	PDAC1 + Fento + Toc	PDAC 2	PDAC2 + Fento	PDAC2 + Fento + Toc	PDAC 3	PDAC3 + Fento	PDAC3 + Fento + Toc	Angio breast	Angio breast + Fento	Angio breast + Fento + Toc	Lipo 2	Lipo 2 + Fento	Lipo 2 + Fento + Toc	Lipo 3	Lipo 3 + Fento	Lipo 3 + Fento + Toc	Lipo 4	Lipo 4 + Fento	Lipo 4 + Fento + Toc	Lipo 5	Lipo 5 + Fento	Lipo 5 + Fento + Toc	UPS	UPS + Fento	UPS + Fento + Toc	PE nmol	460.065	473.353	422.723	815.331	730.661	748.321	254.941	239.89	259.036	131.156	86.4825	89.4188	753.868	750.83
464.278	H43 C22 N1 O7 P1	-0.38ppm	LPE 17:1	2.76894e+06	1.45201e+06	1.29005e+06	1.25398e+06	871107	1.23587e+06	1201184	2191501	2.29167e+06	1.79316e+06	683682	694070	523758	1.4493e+06	1.32707e+06	1.52808e+06	1.83899e+06	1.63176e+06	1.59316e+06	4.12422e+06	603400	638988	1.19709e+06	1.1138e+06	1.14923e+06	2.22909e+06	809768	1.00266e+06	1.18508e+06	974383	1.23236e+06		Lipo 1	Lipo 1 + Fento	Lipo 1 + Fento + Toc	PDAC 1	PDAC1 + Fento	PDAC1 + Fento + Toc	PDAC 2	PDAC2 + Fento	PDAC2 + Fento + Toc	PDAC 3	PDAC3 + Fento	PDAC3 + Fento + Toc	Angio breast	Angio breast + Fento
424.247	H39 C19 N1 O7 P1	0.43ppm	LPE 14:0	232023	108680	90613.5	78396.6	61550.1	95854.1	69411.5	140334	162978	143895	0	0	0	49509.4	52028.5	61676.8	106099	82574.2	94742.3	159281	0	0	16358.5	11325	7994.4	285012	149635	129211	147838	138264	151331	LPE 14:0	2.24544	2.10721	1.87555	2.11972	2.3268	1.73358	1.92107	2.13352	2.40739	0	0	0	1.02483	1.17616
452.278	H43 C21 N1 O7 P1	0.09ppm	LPE 16:0	0	23848.7	11793.1	14473	20413.1	29941.2	19963.7	18475.7	22667.4	20641.2	1.10165e+07	8990710	9.92041e+06	101044	103235	146745	73694	47394.1	43455.6	65889.9	389040	323340	356972	293070	359137	12785.1	10537.8	6235	55058	37797.3	56132.7	LPE 16:0	0.492737	0.274247	0.34625	0.703006	0.726803	0.498601	0.252918	0.296736	0.345332	483.404	388.608	568.225	2.09157	2.33374
450.263	H41 C21 N1 O7 P1	-0.02ppm	LPE 16:1	0	0	0	0	0	0	0	0	0	0	146181	332331	64195.5	0	0	0	0	0	0	0	0	0	0	7620.7	0	0	0	0	9161.9	0	3566.5	LPE 16:1	0	0	0	0	0	0	0	0	0	6.41441	14.3645	3.67701	0	0
480.31	H47 C23 N1 O7 P1	-0.02ppm	LPE 18:0	67824.1	176270	244400	141108	255828	218637	239729	214747	200702	188603	3.6627e+07	2.94268e+07	1.30955e+07	428359	574875	551171	352204	395160	254061	163350	500567	549631	1.37779e+06	1.97634e+06	1.37831e+06	195801	229142	161291	394499	360937	361439	LPE 18:0	3.6419	5.68349	3.37585	8.81046	5.30728	5.98732	2.93973	2.62737	3.15536	1607.19	1271.92	750.09	8.86687	12.9957
478.294	H45 C23 N1 O7 P1	-0.11ppm	LPE 18:1	0	89026.5	157981	61274.2	140142	253145	145803	92864.4	200235	61622.9	5.23114e+06	4.50585e+06	4.79301e+06	194756	161625	252303	150867	116140	114330	439688	965729	583266	862956	636429	832452	80641	49419.5	52851.9	269764	229577	233564	LPE 18:1	1.83937	3.67383	1.46592	4.82635	6.14492	3.64147	1.27124	2.62125	1.03096	229.543	194.758	274.536	4.03138	3.65371
476.278	H43 C23 N1 O7 P1	-0.16ppm	LPE 18:2	0	56558.3	53647.8	47978	32527.5	41890.4	37730.8	0	17260.3	8889.3	168041	216152	59741.6	29907.5	121472	44209.5	77531.3	70610.3	58211.9	25322	95778	38003	100042	65780.4	131436	84048.3	42421.7	40499.6	89320.5	67825	79908.9	LPE 18:2	1.16855	1.24757	1.14782	1.12021	1.01686	0.94234	0	0.225952	0.14872	7.37363	9.34281	3.4219	0.619074	2.74602
474.263	H41 C23 N1 O7 P1	0.41ppm	LPE 18:3	3887.2	0	0	9710.6	0	6319.6	10445.2	4299.1	15960.1	3772.4	0	0	0	0	0	0	13501.7	5043.6	5155.7	4289	0	0	0	0	0	6391.7	0	6223.7	39095.2	6024.7	37895.3	LPE 18:3	0	0	0.232315	0	0.153404	0.260873	0.0588514	0.208932	0.0631131	0	0	0	0	0
508.341	H51 C25 N1 O7 P1	-0.30ppm	LPE 20:0	44820.4	69421	55516.2	52611.3	100156	101857	121203	109114	91838.6	91428.8	1.67662e+06	1.43604e+06	1.56008e+06	22554.3	0	26568	114351	100691	102901	866834	117812	145916	46727	52536.2	44619.9	120303	157227	110262	85590	95176.1	67024	LPE 20:0	1.4343	1.29102	1.25867	3.44926	2.47251	3.02709	1.49369	1.20225	1.52962	73.57	62.0702	89.3591	0.466865	0
506.325	H49 C25 N1 O7 P1	-0.35ppm	LPE 20:1	0	50078.1	56963.7	40172.1	48017.2	52157.2	59701.7	73385.7	74633.7	59048.4	805721	683157	682507	33165.7	18851.6	39013.9	63662.2	148278	49891.9	1634822	642356	557099	191795	148058	172327	85876.9	100226	62852.8	65478.9	63557.6	65076.1	LPE 20:1	1.03466	1.32468	0.961072	1.65366	1.26608	1.49107	1.0046	0.97702	0.987893	35.3551	29.5283	39.0929	0.686517	0.426162
504.31	H47 C25 N1 O7 P1	0.40ppm	LPE 20:2	0	12556.8	9750.3	0	0	0	0	8333.3	4765.3	0	0	0	0	0	0	0	9792.3	5700.1	5602	35893.1	117492	68727.3	0	0	9711.1	5760.9	11956	7398.8	21218.7	24313.3	14294.3	LPE 20:2	0.259436	0.226742	0	0	0	0	0.114077	0.0623819	0	0	0	0	0	0
502.294	H45 C25 N1 O7 P1	0.32ppm	LPE 20:3	0	8189.4	8978.8	5539.2	7640.9	9471.7	9113.2	3772.3	6317.5	4642.1	0	0	0	0	7947.6	10329.4	3795.6	0	0	4483.3	0	0	37925.7	43525.6	52507.5	0	0	0	21341.5	6388.4	9118.1	LPE 20:3	0.169201	0.208801	0.132519	0.263145	0.229919	0.227605	0.0516399	0.0827015	0.0776634	0	0	0	0	0.179665
500.278	H43 C25 N1 O7 P1	0.28ppm	LPE 20:4	0	94251.1	92684.9	78890	161033	182229	154315	171514	298781	115200	0	0	0	228064	318740	300388	151251	131089	107311	36829.4	25099.1	0	161512	198340	178075	16305.6	3386.9	5640	267269	230471	237306	LPE 20:4	1.94732	2.15538	1.88735	5.54581	4.42349	3.85406	2.34789	3.9113	1.92732	0	0	0	4.72084	7.2055
528.309	H47 C27 N1 O7 P1	-0.10ppm	LPE 22:4	0	0	7156.2	0	7605.5	0	9664.6	28701.4	31288	19760	0	0	0	85614	86550	101163	0	3521.1	0	54949.7	149292	18365.9	7956.7	11780.1	0	0	0	0	55150.7	58824.5	60344.1	LPE 22:4	0	0.166417	0	0.261925	0	0.241377	0.392901	0.409587	0.330589	0	0	0	1.77218	1.95656
526.294	H45 C27 N1 O7 P1	-0.04ppm	LPE 22:5	0	5946.6	12609.2	9651.1	0	0	0	23380.6	12995.8	10923.4	0	0	0	64825.8	52998.4	67245.5	5904.9	5781.5	4245.5	18968.6	47103.2	0	9109.7	31182.9	8526.7	0	0	0	25997	10591.4	26253.1	LPE 22:5	0.122862	0.293226	0.230892	0	0	0	0.320063	0.170126	0.182751	0	0	0	1.34187	1.19809
524.277	H43 C27 N1 O7 P1	-1.98ppm	LPE 22:6	113832	67290.5	44903.8	86887.4	141574	165417	114800	98696.4	69607.2	104140	0	0	0	101285	172248	128903	106113	99024.2	101799	192318	26235.9	0	25205.6	34899.5	61369.6	148448	85888.5	143313	128608	148362	123298	LPE 22:6	1.39029	1.04423	2.07868	4.87566	4.01539	2.86716	1.35108	0.911218	1.74229	0	0	0	2.09657	3.89386
[truncated: 46 more columns]

## Sheet: PS and PSOx
precursorexpmz$A	sumcomposition	precursorppmdev$A	name	intensity:E8_Sebastian_2_00.mzML	intensity:E8_Sebastian_2_01.mzML	intensity:E8_Sebastian_2_02.mzML	intensity:E8_Sebastian_2_03.mzML	intensity:E8_Sebastian_2_04.mzML	intensity:E8_Sebastian_2_05.mzML	intensity:E8_Sebastian_2_06.mzML	intensity:E8_Sebastian_2_07.mzML	intensity:E8_Sebastian_2_08.mzML	intensity:E8_Sebastian_2_09.mzML	intensity:E8_Sebastian_2_10.mzML	intensity:E8_Sebastian_2_11.mzML	intensity:E8_Sebastian_2_12.mzML	intensity:E8_Sebastian_2_13.mzML	intensity:E8_Sebastian_2_14.mzML	intensity:E8_Sebastian_2_15.mzML	intensity:E8_Sebastian_2_16.mzML	intensity:E8_Sebastian_2_17.mzML	intensity:E8_Sebastian_2_18.mzML	intensity:E8_Sebastian_2_19.mzML	intensity:E8_Sebastian_2_20.mzML	intensity:E8_Sebastian_2_21.mzML	intensity:E8_Sebastian_2_22.mzML	intensity:E8_Sebastian_2_23.mzML	intensity:E8_Sebastian_2_24.mzML	intensity:E8_Sebastian_2_25.mzML	intensity:E8_Sebastian_2_26.mzML	intensity:E8_Sebastian_2_27.mzML	intensity:E8_Sebastian_2_28.mzML	intensity:E8_Sebastian_2_29.mzML	intensity:E8_Sebastian_2_30.mzML		Normalization
					Lipo 1	Lipo 1 + Fento	Lipo 1 + Fento + Toc	PDAC 1	PDAC1 + Fento	PDAC1 + Fento + Toc	PDAC 2	PDAC2 + Fento	PDAC2 + Fento + Toc	PDAC 3	PDAC3 + Fento	PDAC3 + Fento + Toc	Angio breast	Angio breast + Fento	Angio breast + Fento + Toc	Lipo 2	Lipo 2 + Fento	Lipo 2 + Fento + Toc	Lipo 3	Lipo 3 + Fento	Lipo 3 + Fento + Toc	Lipo 4	Lipo 4 + Fento	Lipo 4 + Fento + Toc	Lipo 5	Lipo 5 + Fento	Lipo 5 + Fento + Toc	UPS	UPS + Fento	UPS + Fento + Toc		Lipo 1	Lipo 1 + Fento	Lipo 1 + Fento + Toc	PDAC 1	PDAC1 + Fento	PDAC1 + Fento + Toc	PDAC 2	PDAC2 + Fento	PDAC2 + Fento + Toc	PDAC 3	PDAC3 + Fento	PDAC3 + Fento + Toc	Angio breast	Angio breast + Fento
###	Phosphatidylserine			0	1	2	3	4	5	6	7	8	9	10	11	12	13	14	15	16	17	18	19	20	21	22	23	24	25	26	27	28	29	30		766.426	726.009	745.463	884.58	592.002	635.639	212.838	252.18	212.762	162.259	143.907	183.689	1538.3	1525.14
762.529	H77 C40 N1 O10 P1	0.61ppm	PS 34:0	9.42984e+06	3799808	3.3103e+06	4.66175e+06	3.44545e+06	4.00559e+06	4.42292e+06	6.65323e+06	3.16799e+06	6.36151e+06	995482	1.02163e+06	891474	5.53879e+06	5.72336e+06	4.29164e+06	1.6105e+06	2.01311e+06	4.90845e+06	5.78072e+06	2.49266e+06	2.38141e+06	1369904	2.43753e+06	2.3481e+06	1.82603e+06	1.66863e+06	6.3154e+06	2.37783e+06	2.33714e+06	2.66932e+06		1	2	3	4	5	6	7	8	9	10	11	12	13	14
734.498	H73 C38 N1 O10 P1	0.86ppm	PS 32:0	0	89941.4	92909.9	72792.3	0	0	0	49481.3	28520.8	49759.7	0	0	0	1.5823e+06	1.65262e+06	1.19816e+06	25844.2	0	0	46795.2	337741	340223	119525	234081	223740	0	0	0	128029	154328	147343	PS 32:0	1.1835	1.40335	0.780741	0	0	0	0.371859	0.450141	0.391099	0	0	0	14.2838	14.4375
732.483	H71 C38 N1 O10 P1	1.22ppm	PS 32:1	0	27519.7	18603.4	0	9977.5	0	0	21343.4	12718.7	10754.1	0	0	0	906286	1.01865e+06	692006	21155.9	27672.4	35635.1	23927.6	329742	359833	52904.4	136757	117628	0	0	0	24298.3	10582	19855	PS 32:1	0.36212	0.280993	0	0.144793	0	0	0.160399	0.200738	0.0845247	0	0	0	8.18127	8.89906
760.514	H75 C40 N1 O10 P1	0.63ppm	PS 34:1	0	1626262	1.44749e+06	1.68646e+06	918111	677403	771886	784083	404805	778838	47104.4	0	0	1.28237e+07	1.35254e+07	1.01688e+07	820529	906905	1.45224e+06	1.15733e+06	11158347	1.1172e+07	5.94833e+06	4.48479e+06	4.67722e+06	180226	173824	449438	980977	996190	1095182	PS 34:1	21.3993	21.8635	18.0883	13.3235	8.45573	8.72598	5.89249	6.38899	6.12148	2.36591	0	0	115.763	118.16
788.545	H79 C42 N1 O10 P1	0.79ppm	PS 36:1	0	16850239	1.20418e+07	1.86183e+07	3.90794e+07	3.06172e+07	3.67334e+07	1.30441e+07	6.73068e+06	1.24006e+07	1460370	1.35759e+06	1407928	3.79179e+07	3.8194e+07	30446727	1.04018e+07	1.11668e+07	2.24426e+07	1.47726e+07	1.15241e+08	137622409	7.15097e+07	6.48011e+07	1.2145e+08	2.78441e+06	2.30212e+06	8.2404e+06	1.78818e+07	1.78175e+07	2.06754e+07	PS 36:1	221.725	181.883	199.692	567.116	382.181	415.262	98.0283	106.23	97.4659	73.3499	66.4423	78.9663	342.294	333.668
816.577	H83 C44 N1 O10 P1	1.07ppm	PS 38:1	0	4.97947e+06	4822280	6.49552e+06	2.67447e+06	2.32571e+06	2.52251e+06	973297	654845	890634	265605	438412	274763	1.21492e+07	1.2751e+07	9461045	3.3103e+06	4841058	6.98371e+06	3.73027e+06	3.17968e+07	3.21162e+07	8.37508e+06	2.12499e+07	2.21057e+07	1.11745e+06	970532	1.84471e+06	2.99778e+06	3.30148e+06	3.44001e+06	PS 38:1	65.5226	72.8375	69.6683	38.8117	29.0308	28.5163	7.31446	10.3353	7.00017	13.3405	21.4566	15.4106	109.673	111.394
844.608	H87 C46 N1 O10 P1	0.71ppm	PS 40:1	0	5.94032e+06	5.75959e+06	8141771	3.81827e+06	3.64667e+06	3.71229e+06	959702	671375	935004	65637.6	0	42884.9	1.12058e+07	1.1626e+07	8.89789e+06	2.98284e+06	4.60277e+06	6.64964e+06	1.88565e+06	1.59805e+07	1.56859e+07	4.26345e+06	14249679	1.43077e+07	1.19473e+06	1.10157e+06	2.04587e+06	2.81868e+06	3.09745e+06	3.1982e+06	PS 40:1	78.1661	86.9951	87.3253	55.4103	45.5198	41.9665	7.2123	10.5962	7.34891	3.29677	0	2.40528	101.158	101.567
872.64	H91 C48 N1 O10 P1	1.16ppm	PS 42:1	0	296642	298229	396394	567932	502768	713447	179184	98979.5	160768	0	0	0	1.85956e+06	1.82652e+06	1.46837e+06	636207	801824	1.1273e+06	1.04013e+06	1.05305e+07	1.08865e+07	421965	1.18279e+06	1.16519e+06	59138.5	58431.5	113593	225337	247559	232647	PS 42:1	3.90338	4.50457	4.25156	8.24177	6.27583	8.06534	1.34659	1.56218	1.2636	0	0	0	16.7867	15.9568
842.592	H85 C46 N1 O10 P1	0.77ppm	PS 40:2	0	3.57457e+06	3.4349e+06	4.61697e+06	1.5747e+06	1267150	1427679	781328	496666	846001	0	57343.5	82188.4	5.92571e+06	5927348	4747446	1.58897e+06	2.23046e+06	3.29307e+06	15284156	1.57926e+07	1.61477e+07	7314292	1.63414e+07	1.71505e+07	445468	413058	775498	1.28933e+06	1.49532e+06	1.44374e+06	PS 40:2	47.0361	51.882	49.5198	22.8518	15.8173	16.1395	5.87179	7.83883	6.64937	0	2.80648	4.60969	53.4929	51.7821
786.53	H77 C42 N1 O10 P1	1.03ppm	PS 36:2	0	6.97027e+06	5.17719e+06	7.7008e+06	2.65391e+06	2.05827e+06	2.34264e+06	1.69269e+06	873482	1.72225e+06	510714	376986	352931	8.97714e+06	9.08152e+06	7.12156e+06	4.62774e+06	4.68487e+06	9.38209e+06	50865464	5.72341e+07	57934756	1.66299e+07	25574296	2.89213e+07	1.45035e+06	1285771	4.41101e+06	2.53406e+06	2.65503e+06	2.99385e+06	PS 36:2	91.7187	78.1982	82.5957	38.5133	25.6925	26.4829	12.7208	13.7861	13.5365	25.6516	18.4502	19.7948	81.0389	79.3373
814.561	H81 C44 N1 O10 P1	1.08ppm	PS 38:2	0	959759	738282	1.136e+06	1.19848e+06	804507	1.02675e+06	746785	418185	712999	81743.9	108693	217989	2734384	2.70232e+06	2134244	754191	938882	1.35877e+06	26786944	2.8841e+07	2.94574e+07	1.5369e+07	2.37597e+07	26056494	167647	161870	430835	503508	507194	528652	PS 38:2	12.629	11.1513	12.1843	17.3922	10.0423	11.6072	5.6122	6.60017	5.604	4.10574	5.31958	12.2263	24.684	23.6079
870.624	H89 C48 N1 O10 P1	1.05ppm	PS 42:2	0	546010	578740	798545	551492	446505	554208	285285	164658	266367	0	0	0	2671379	2.64531e+06	2.09484e+06	528640	702350	986474	10149635	10967525	1.0682e+07	1.11153e+06	2.75699e+06	2.96518e+06	186685	183392	304841	305861	354117	403066	PS 42:2	7.18471	8.74151	8.56487	8.0032	5.57353	6.26519	2.14396	2.59879	2.09358	0	0	0	24.1152	23.1098
758.498	H73 C40 N1 O10 P1	0.65ppm	PS 34:2	0	256128	244254	276066	39767.4	44826.2	43093.7	91981.7	33792.9	68206	43822	0	0	944679	999767	717084	184135	205789	269728	115776	0	0	822494	1.40552e+06	1.44041e+06	66424.9	60297.6	156610	137444	151198	144273	PS 34:2	3.37028	3.68931	2.96098	0.577101	0.559546	0.487163	0.691256	0.53335	0.536083	2.20104	0	0	8.52785	8.7341
808.514	H75 C44 N1 O10 P1	1.15ppm	PS 38:5	0	278634	272950	325272	134900	68089.1	109141	191338	86678.7	192363	0	0	0	1.52445e+06	1.51292e+06	1.1565e+06	167414	156155	274650	26516.5	595323	612312	613437	901380	966990	36925	46380.4	133541	138656	131596	164983	PS 38:5	3.66642	4.12275	3.48873	1.95766	0.849927	1.23381	1.43793	1.36804	1.51193	0	0	0	13.7616	13.217
784.514	H75 C42 N1 O10 P1	0.87ppm	PS 36:3	31482.6	455948	361195	481201	146177	54728.2	128810	150250	69072.1	127202	0	0	0	854276	864271	648449	264565	285664	402548	2832013	3.13212e+06	3.21368e+06	1369441	2.18576e+06	2339939	77913.4	72625.9	220721	167886	152214	193486	PS 36:3	5.99962	5.45563	5.16117	2.12131	0.683148	1.45617	1.12915	1.09016	0.99978	0	0	0	7.71176	7.55038
812.545	H79 C44 N1 O10 P1	0.85ppm	PS 38:3	0	3.40336e+06	2.56091e+06	3.77699e+06	1.51749e+06	891802	1163220	1.65049e+06	843908	1.58901e+06	445691	547770	836313	5.95094e+06	5.70462e+06	4.47826e+06	1.58732e+06	1.62227e+06	3.15652e+06	7894989	8.50265e+06	8784599	2.04908e+07	3.17241e+07	3.70649e+07	339490	292494	897134	643033	632044	745463	PS 38:3	44.7833	38.681	40.5104	22.0217	11.132	13.1499	12.4037	13.3193	12.4892	22.3857	26.8087	46.9062	53.7207	49.8363
840.577	H83 C46 N1 O10 P1	0.84ppm	PS 40:3	0	1.67546e+06	1.78665e+06	2.3809e+06	968442	767021	917644	802068	595572	814092	0	53601.2	60088.8	1.12086e+07	1.18303e+07	9102552	831014	1.31938e+06	1502858	3111804	3.24016e+06	3128296	2.1129e+06	5.23749e+06	5.52443e+06	209138	184074	301936	1.18449e+06	1.39485e+06	1.25335e+06	PS 40:3	22.0466	26.9863	25.5366	14.0539	9.57439	10.3737	6.02765	9.39985	6.39857	0	2.62332	3.37019	101.183	103.351
838.561	H81 C46 N1 O10 P1	0.85ppm	PS 40:4	0	2.0243e+06	1.49001e+06	2.46779e+06	816204	463701	637004	1.65275e+06	839753	1.62218e+06	0	0	0	15484461	1.4832e+07	1.25777e+07	593035	646178	1.09869e+06	3135069	3.32551e+06	3.43746e+06	5.26605e+06	8.30171e+06	9.93309e+06	99953.9	85298.6	211303	1332332	1.33385e+06	1.5798e+06	PS 40:4	26.6369	22.5057	26.4685	11.8447	5.78818	7.20117	12.4207	13.2537	12.75	0	0	0	139.782	129.574
836.546	H79 C46 N1 O10 P1	1.36ppm	PS 40:5	0	2.19304e+06	1.45609e+06	2.55215e+06	0	0	0	1.15058e+06	494748	1.05204e+06	0	0	0	8.08877e+06	10782129	6.65723e+06	587649	513700	1.61183e+06	208258	1.97719e+06	1.82138e+06	3.47187e+06	6.51775e+06	6.29483e+06	115668	140002	465925	601036	488105	530500	PS 40:5	28.8573	21.9934	27.3733	0	0	0	8.64678	7.80855	8.26879	0	0	0	73.0194	94.1941
832.514	H75 C46 N1 O10 P1	1.34ppm	PS 40:7	0	58299.6	42905.3	61467.6	15404.1	0	10468.2	41129.2	9516.9	47360.6	46667.6	0	0	473444	496892	365096	57495.5	37633.1	87818	494346	787330	722720	1.39182e+06	591730	620286	7836.4	0	0	6637.9	26647.3	33905.8	PS 40:7	0.767139	0.648058	0.659277	0.223543	0	0.11834	0.309092	0.150204	0.372243	2.34397	0	0	4.27389	4.34092
782.499	H73 C42 N1 O10 P1	0.95ppm	PS 36:4	0	108159	110094	112440	76515.2	24540	26868.7	85622.3	35251.1	71110.4	0	0	0	947914	1.06909e+06	816033	45437.1	62368	103941	0	145364	178350	239739	432591	394632	0	0	9484.8	70442.8	64499.2	92328	PS 36:4	1.42322	1.6629	1.20598	1.11038	0.306322	0.303744	0.643464	0.556364	0.558911	0	0	0	8.55706	9.33975
810.53	H77 C44 N1 O10 P1	1.20ppm	PS 38:4	0	3.49742e+06	2.48804e+06	3.92929e+06	2.57973e+06	1.52212e+06	2.00438e+06	1.59337e+06	1595276	1.59888e+06	263162	0	0	1.1403e+07	1.04013e+07	9.10622e+06	1.84955e+06	1.75289e+06	4.21058e+06	0	3.07881e+06	3.07302e+06	6.40195e+06	1.00933e+07	1.17202e+07	0	359680	261755	1.22854e+06	1.25118e+06	1.47858e+06	PS 38:4	46.021	37.5803	42.1439	37.4368	18.9999	22.659	11.9744	25.1781	12.5668	13.2178	0	0	102.938	90.867
868.608	H87 C48 N1 O10 P1	0.86ppm	PS 42:3	0	1.44609e+06	1.78597e+06	2.10781e+06	1.06725e+06	842467	916489	785616	544481	708370	0	0	0	6.31555e+06	6.38469e+06	4.98781e+06	798197	1.31522e+06	1.47866e+06	1727946	1.52099e+06	1.61247e+06	1.01867e+06	3.19143e+06	3.27414e+06	288115	307346	451420	1.07273e+06	1.22125e+06	1.1907e+06	PS 42:3	19.0284	26.9759	22.6075	15.4878	10.5161	10.3607	5.90401	8.59348	5.56762	0	0	0	57.0121	55.7775
866.593	H85 C48 N1 O10 P1	1.29ppm	PS 42:4	0	987608	1.05707e+06	1.36826e+06	546898	400902	465613	419010	275075	404926	0	0	0	4.44932e+06	4.62641e+06	3.53796e+06	359978	691554	767270	2825778	2.89417e+06	2.8049e+06	1131473	2.57465e+06	2.81232e+06	176627	175141	290641	543958	649818	578383	PS 42:4	12.9955	15.9664	14.6754	7.93653	5.00429	5.26364	3.14892	4.34148	3.18262	0	0	0	40.1651	40.417
864.578	H83 C48 N1 O10 P1	1.98ppm	PS 42:5	0	0	0	0	0	0	0	0	0	0	0	0	0	4.00744e+06	4.12336e+06	3.2858e+06	0	0	0	0	2.21341e+06	2.21344e+06	809694	1.27089e+06	1.34807e+06	0	0	0	0	0	0	PS 42:5	0	0	0	0	0	0	0	0	0	0	0	0	36.1762	36.0222
862.562	H81 C48 N1 O10 P1	1.30ppm	PS 42:6	0	0	0	0	0	0	0	189742	0	0	0	0	0	0	0	0	0	0	0	125586	479316	422586	0	0	0	0	0	0	0	0	0	PS 42:6	0	0	0	0	0	0	1.42594	0	0	0	0	0	0	0
###	PhosphatidylserineOx1
750.493	H73 C38 N1 O11 P1	0.78ppm	PSOx1 32:0	26650.6	52656.3	24195.6	21966.5	24783.8	49226.6	27693.4	39568.4	28126.9	74510.5	0	0	0	0	0	0	25623.3	6697.7	23159.6	53982	0	0	0	0	0	38449.9	16701.2	42687.5	20546.6	48884.3	43125.4	PSOx1 32:0	0.692881	0.365459	0.235604	0.35966	0.614474	0.313067	0.297362	0.443924	0.585635	0	0	0	0	0
806.556	H81 C42 N1 O11 P1	0.64ppm	PSOx1 36:0	47540.4	0	0	0	0	0	0	23056	32215.5	13107.8	806273	903363	687839	0	0	0	0	0	7629.7	512780	0	0	0	0	0	0	6779	34519.5	8939.9	0	14772.9	PSOx1 36:0	0	0	0	0	0	0	0.173269	0.508454	0.103024	40.4966	44.2119	38.5788	0	0
834.587	H85 C44 N1 O11 P1	0.61ppm	PSOx1 38:0	0	18441.3	0	8006.4	0	16079.5	0	0	0	0	374519	490234	250085	24378.8	55426.4	27788.7	76144.1	121826	115797	0	0	0	0	50475.2	35464	0	0	0	20269.8	40073.8	11796.9	PSOx1 38:0	0.242661	0	0.0858734	0	0.200713	0	0	0	0	18.8109	23.9928	14.0265	0.220073	0.484212
862.618	H89 C46 N1 O11 P1	0.14ppm	PSOx1 40:0	0	0	0	0	0	0	0	0	0	0	0	0	0	0	19074.6	9390.3	12060.8	18435.5	15624.4	0	0	0	0	0	0	0	0	0	135160	193457	150290	PSOx1 40:0	0	0	0	0	0	0	0	0	0	0	0	0	0	0.166638
804.54	H79 C42 N1 O11 P1	0.78ppm	PSOx1 36:1	61870.7	42705.7	62314.2	34438.7	30370.8	60670.8	33336.5	93692.5	47264.1	82784.9	0	64850.4	0	0	0	0	15029.6	28571.5	49195.8	160810	852137	820295	234324	283413	162065	26574.1	31032.3	76301.4	50560.8	51227.9	50605.1	PSOx1 36:1	0.561945	0.941217	0.369376	0.440738	0.757327	0.376861	0.704113	0.745964	0.65067	0	3.17387	0	0	0
832.572	H83 C44 N1 O11 P1	1.05ppm	PSOx1 38:1	0	6306.1	12692.4	8824	13765.3	23558.7	30648.2	16204.6	24034.6	0	220706	1183583	399480	20362.9	32204.7	12983.9	35975.8	43116.1	32464.1	156568	3.28919e+06	1.0861e+06	0	58873.7	20099.5	0	0	5767	141538	116571	145570	PSOx1 38:1	0.0829792	0.191711	0.0946426	0.199761	0.294073	0.34647	0.12178	0.379335	0	11.0854	57.9263	22.4056	0.183821	0.281345
860.602	H87 C46 N1 O11 P1	0.29ppm	PSOx1 40:1	0	10896	16840.5	12403.5	0	0	15478.9	6962.6	0	0	0	0	0	24266.6	60995.9	17910.6	9018.5	67382.3	25071.9	0	0	0	0	0	0	0	0	0	113305	73664.2	68091.2	PSOx1 40:1	0.143376	0.254365	0.133035	0	0	0.174985	0.0523249	0	0	0	0	0	0.219061	0.532868
830.557	H81 C44 N1 O11 P1	1.48ppm	PSOx1 38:2	0	24617	8035.5	13854.2	23802.1	27254.4	0	58600.2	26135.9	44983.4	0	56782.8	272236	15167.2	13503.7	0	33550.2	53243.4	51981.4	192815	2.46503e+06	2.26795e+06	110277	292126	271202	0	0	11129.5	102904	95714.8	105776	PSOx1 38:2	0.323924	0.121371	0.148595	0.345414	0.340205	0	0.440389	0.4125	0.353559	0	2.77903	15.2689	0.136918	0.11797
802.525	H77 C42 N1 O11 P1	1.58ppm	PSOx1 36:2	0	0	0	0	11858.2	0	0	54596.7	21032.5	39042.1	0	0	0	0	0	0	15195.7	16177.8	16640.2	269462	3.20209e+06	3.07979e+06	26895.2	27613.6	41998.4	7646.2	4680.6	19742.9	23784.7	0	43786.3	PSOx1 36:2	0	0	0	0.172085	0	0	0.410302	0.331954	0.306862	0	0	0	0	0
858.587	H85 C46 N1 O11 P1	1.04ppm	PSOx1 40:2	0	0	5918.2	0	0	0	17415.1	0	0	0	38219.1	65261.1	135189	0	0	0	0	7794.5	0	0	120043	83557	0	0	0	0	0	0	26354.5	28781.9	26591	PSOx1 40:2	0	0.0893907	0	0	0	0.196873	0	0	0	1.91963	3.19397	7.58235	0	0
792.445	H67 C42 N1 O11 P1	-1.43ppm	PSOx1 36:7	-1.7	0	0	0	0	0	0	0	0	0	0	0	0	0	0	0	0	0	0	0	0	0	0	0	0	0	0	0	0	0	18011.2	PSOx1 36:7	0	0	0	0	0	0	0	0	0	0	0	0	0	0
828.541	H79 C44 N1 O11 P1	1.28ppm	PSOx1 38:3	0	0	0	0	0	0	0	15518.1	13832.1	15767.7	0	0	0	0	0	0	0	16003.1	0	65235.3	856164	488310	38946.2	89389.7	44126.8	0	0	0	13206.2	6583.2	23528.2	PSOx1 38:3	0	0	0	0	0	0	0.116621	0.21831	0.12393	0	0	0	0	0
826.525	H77 C44 N1 O11 P1	1.71ppm	PSOx1 38:4	0	0	0	0	0	0	0	0	0	0	0	0	0	0	14718.8	0	0	0	0	0	0	0	0	19859.9	0	0	0	0	10519.1	12234	0	PSOx1 38:4	0	0	0	0	0	0	0	0	0	0	0	0	0	0.128585
824.509	H75 C44 N1 O11 P1	1.15ppm	PSOx1 38:5	0	0	0	0	0	0	0	0	0	0	0	0	0	0	0	0	0	0	0	0	0	0	0	0	0	0	0	0	11673.4	0	0	PSOx1 38:5	0	0	0	0	0	0	0	0	0	0	0	0	0	0
822.494	H73 C44 N1 O11 P1	1.08ppm	PSOx1 38:6	43669.1	0	0	0	0	0	0	34919.6	6567.5	45035.8	0	0	0	0	0	0	78759.3	53938.1	0	20287.2	0	0	0	0	0	27806.6	55880.2	50357.7	0	0	0	PSOx1 38:6	0	0	0	0	0	0	0.262426	0.103654	0.353971	0	0	0	0	0
800.509	H75 C42 N1 O11 P1	0.88ppm	PSOx1 36:3	0	0	0	0	0	0	0	0	0	0	0	0	0	0	0	0	0	0	0	0	0	0	0	0	0	0	0	0	0	0	0	PSOx1 36:3	0	0	0	0	0	0	0	0	0	0	0	0	0	0
790.429	H65 C42 N1 O11 P1	-1.22ppm	PSOx1 36:8	68341.1	27468.6	43178.9	17333.3	46307.9	41026.9	31409.4	9552.8	0	6553.9	0	0	0	0	0	0	34963.8	8981.9	10165.1	25970.5	0	0	0	0	0	60156.2	42035.7	66310.9	25156.8	45783.5	36335.8	PSOx1 36:8	0.361447	0.65219	0.18591	0.672016	0.512121	0.355075	0.0717907	0	0.0515121	0	0	0	0	0
770.462	H69 C40 N1 O11 P1	0.29ppm	PSOx1 34:4	0	0	0	0	0	0	0	0	0	0	0	0	0	0	0	0	0	0	0	0	0	0	0	0	0	0	0	0	0	0	0	PSOx1 34:4	0	0	0	0	0	0	0	0	0	0	0	0	0	0
856.572	H83 C46 N1 O11 P1	0.97ppm	PSOx1 40:3	0	0	7017.6	0	0	0	0	0	8338.5	0	0	0	106787	27418.8	56190.1	0	0	0	0	0	138768	110945	0	26368	18667.9	0	0	0	27122.1	42962.5	42589.9	PSOx1 40:3	0	0.105996	0	0	0	0	0	0.131606	0	0	0	5.98937	0.247516	0.490884
854.556	H81 C46 N1 O11 P1	0.71ppm	PSOx1 40:4	0	5294.7	0	0	0	0	0	0	0	0	0	0	0	11537.5	24342.4	16574.3	0	0	0	0	62116.9	53926.2	0	31746.9	0	0	0	0	32319.2	16996.6	23308.3	PSOx1 40:4	0.0696706	0	0	0	0	0	0	0	0	0	0	0	0.104152	0.212658
852.54	H79 C46 N1 O11 P1	0.96ppm	PSOx1 40:5	0	7532.5	0	17884.7	11478.6	0	0	0	0	8381.3	0	0	0	52032.1	49464.3	53848.8	0	0	0	0	74760.1	43062.5	0	0	23831.6	0	0	5342.3	43311.6	37155.6	32399.2	PSOx1 40:5	0.0991169	0	0.191824	0.166576	0	0	0	0	0.065875	0	0	0	0.469707	0.432127
850.525	H77 C46 N1 O11 P1	0.97ppm	PSOx1 40:6	0	0	0	0	0	0	0	0	0	0	0	0	0	0	21940.6	22421	0	0	0	0	0	0	0	14032.4	0	0	0	0	0	7797	0	PSOx1 40:6	0	0	0	0	0	0	0	0	0	0	0	0	0	0.191676
846.492	H73 C46 N1 O11 P1	-0.17ppm	PSOx1 40:8	16714.8	0	0	0	15667.1	39669.6	49980.8	7822.4	0	0	0	0	0	0	0	0	4716.6	0	0	0	0	0	0	0	0	21348.4	58048.5	42696.6	38992.9	50987.9	47612.4	PSOx1 40:8	0	0	0	0.227359	0.495178	0.56502	0.0587865	0	0	0	0	0	0	0
884.603	H87 C48 N1 O11 P1	0.92ppm	PSOx1 42:3	0	0	0	0	0	0	0	0	0	0	0	0	39764.1	15026.9	22920.2	0	0	0	0	0	0	0	0	0	0	0	0	0	9060	16680.4	13852.2	PSOx1 42:3	0	0	0	0	0	0	0	0	0	0	0	2.23025	0.135652	0.200234
882.588	H85 C48 N1 O11 P1	1.38ppm	PSOx1 42:4	0	0	0	0	0	0	0	0	5222	0	0	0	0	0	0	31871.9	0	0	0	0	14121.3	0	0	0	0	0	0	7133.4	16010.3	12177.4	15420.6	PSOx1 42:4	0	0	0	0	0	0	0	0.0824182	0	0	0	0	0	0
880.572	H83 C48 N1 O11 P1	1.48ppm	PSOx1 42:5	0	0	0	0	0	0	0	0	0	0	0	0	0	0	53308.1	0	0	0	0	0	65723.3	67505	0	0	0	0	5892.4	0	0	12522.7	18469.1	PSOx1 42:5	0	0	0	0	0	0	0	0	0	0	0	0	0	0.465707
878.557	H81 C48 N1 O11 P1	1.63ppm	PSOx1 42:6	0	0	0	0	0	0	0	0	0	0	0	0	0	0	0	0	0	0	0	0	34142.5	0	0	0	0	0	0	0	0	0	0	PSOx1 42:6	0	0	0	0	0	0	0	0	0	0	0	0	0	0
###	PhosphatidylserineOx2
764.473	H71 C38 N1 O12 P1	1.09ppm	PSOx2 32:1	0	0	10680.6	0	0	0	0	0	0	0	0	0	0	0	0	0	0	0	0	10058.6	26909.7	42751.1	0	0	0	0	0	0	0	0	0	PSOx2 32:1	0	0.161324	0	0	0	0	0	0	0	0	0	0	0	0
848.565	H83 C44 N1 O12 P1	-0.49ppm	PSOx2 38:1	21068	0	0	0	0	0	0	0	23578.5	47137.9	67809.3	49428.2	0	0	0	0	0	0	0	220482	673423	0	0	0	0	0	0	0	0	181754	0	PSOx2 38:1	0	0	0	0	0	0	0	0.372137	0.370493	3.40585	2.41909	0	0	0
792.504	H75 C40 N1 O12 P1	0.96ppm	PSOx2 34:1	0	9274.1	0	0	0	0	0	5806	0	7143.7	0	0	0	204288	271636	219099	0	0	0	11743.9	95984.8	37847.6	0	0	0	0	0	0	37016.7	42430.5	53941	PSOx2 34:1	0.122034	0	0	0	0	0	0.0436329	0	0.0561478	0	0	0	1.84416	2.37305
902.613	H89 C48 N1 O12 P1	0.32ppm	PSOx2 42:2	5042.1	168540	117729	186932	355603	251978	32825.1	39179.2	40185.5	66782.3	285849	294612	423927	172152	199045	140686	160229	186146	246977	480841	4.07605e+06	3.72856e+06	282373	470877	490914	66386.4	77008.3	120127	17906.8	25771.1	38920.5	PSOx2 42:2	2.21775	1.77822	2.00495	5.16047	3.14533	0.371079	0.294437	0.634243	0.524893	14.3573	14.4187	23.7767	1.55405	1.73889
818.52	H77 C42 N1 O12 P1	1.19ppm	PSOx2 36:2	0	307601	297822	260640	168339	133128	109227	142046	105113	147356	0	43613.3	0	1.73081e+06	2.12187e+06	1814244	153713	186398	217468	343845	3.31718e+06	3.21603e+06	679985	1.12516e+06	1.16024e+06	91830.8	71894.1	157134	349071	359860	427869	PSOx2 36:2	4.04759	4.49842	2.79551	2.44291	1.66178	1.23478	1.0675	1.65899	1.15819	0	2.1345	0	15.6244	18.537
874.582	H85 C46 N1 O12 P1	0.36ppm	PSOx2 40:2	0	271554	241495	265042	208428	154556	202240	82547.4	40465.3	87056.4	541506	507256	552806	223634	220630	232574	206638	246241	326599	1.05775e+06	8.62076e+06	8.2687e+06	896456	1677566	2.00559e+06	59234	54076.4	117795	170803	172835	163124	PSOx2 40:2	3.57326	3.64763	2.84273	3.02468	1.92925	2.28627	0.620356	0.638659	0.684243	27.1982	24.8259	31.0052	2.0188	1.92745
790.489	H73 C40 N1 O12 P1	1.14ppm	PSOx2 34:2	0	0	0	0	0	0	0	0	0	0	106444	319134	197756	132161	155442	136768	0	0	0	0	24204	34407.9	0	12108.1	0	0	0	0	0	0	9815.1	PSOx2 34:2	0	0	0	0	0	0	0	0	0	5.34635	15.6189	11.0915	1.19305	1.35796
846.551	H81 C44 N1 O12 P1	0.74ppm	PSOx2 38:2	0	3790675	2.51986e+06	3.56167e+06	7.19033e+06	5.81233e+06	5.6004e+06	2415458	1.726e+06	2.7025e+06	379068	375475	486087	5.50908e+06	5.57743e+06	5391783	1.83261e+06	2.22327e+06	3.54316e+06	4.6573e+06	4.22666e+07	4.02618e+07	1.59988e+07	2.59292e+07	31986795	1.34259e+06	919346	2.81247e+06	6.30863e+06	6.81787e+06	7.85827e+06	PSOx2 38:2	49.8798	38.0609	38.201	104.345	72.5528	63.3111	18.1525	27.2413	21.241	19.0394	18.3763	27.2631	49.7319	48.7252
762.457	H69 C38 N1 O12 P1	0.67ppm	PSOx2 32:2	0	5485.2	14171.4	14124.2	0	0	0	0	0	0	0	0	0	0	0	0	0	0	0	0	0	0	102495	322736	275625	0	0	0	0	0	0	PSOx2 32:2	0.0721773	0.21405	0.15149	0	0	0	0	0	0	0	0	0	0	0
840.504	H75 C44 N1 O12 P1	0.87ppm	PSOx2 38:5	0	16162.1	0	0	15250.9	0	0	0	0	0	0	0	0	162486	211750	186641	6490.3	0	0	0	0	25838.6	24312.4	93985	61228	0	0	0	19362.5	14181.6	39538.2	PSOx2 38:5	0.21267	0	0	0.22132	0	0	0	0	0	0	0	0	1.46681	1.84988
838.487	H73 C44 N1 O12 P1	-1.21ppm	PSOx2 38:6	0	0	0	0	0	0	0	0	0	0	0	0	0	0	0	0	0	0	0	0	0	0	0	0	0	0	0	0	0	0	0	PSOx2 38:6	0	0	0	0	0	0	0	0	0	0	0	0	0	0
844.535	H79 C44 N1 O12 P1	1.03ppm	PSOx2 38:3	82323.9	1.50636e+06	2.01009e+06	1.42534e+06	471616	379728	342183	302090	229262	345504	62628.4	94473.2	81096.5	1.30842e+06	1.50643e+06	1.28623e+06	775335	945297	1.21619e+06	1.15302e+07	1.76635e+07	1.66662e+07	3.55928e+06	6.7584e+06	7.4045e+06	699921	1.46729e+06	1.3715e+06	880807	965170	1.16335e+06	PSOx2 38:3	19.8215	30.3612	15.2876	6.84405	4.73998	3.8683	2.27025	3.61842	2.71558	3.14563	4.62366	4.54845	11.8114	13.1604
872.566	H83 C46 N1 O12 P1	0.41ppm	PSOx2 40:3	0	211742	172730	196619	204387	190403	154791	137229	103910	162408	0	0	0	280465	374068	305890	131180	178196	172756	865081	8.43713e+06	7.89829e+06	3.74592e+06	6.22192e+06	6.68671e+06	76637.7	56919.7	126543	152021	153125	196545	PSOx2 40:3	2.78622	2.60898	2.10885	2.96604	2.37672	1.74988	1.03129	1.64	1.27648	0	0	0	2.53182	3.26791
870.551	H81 C46 N1 O12 P1	0.62ppm	PSOx2 40:4	0	659778	452902	704381	260569	206119	165046	326141	214139	363877	58017.8	0	81093.1	736199	920098	755149	295496	347840	471262	287152	2.44022e+06	2.38189e+06	5.05627e+06	8.33187e+06	9649655	159561	121297	309289	226739	227230	315059	PSOx2 40:4	8.68173	6.8408	7.55491	3.78136	2.5729	1.8658	2.451	3.37973	2.85999	2.91405	0	4.54826	6.64585	8.0381
868.535	H79 C46 N1 O12 P1	0.82ppm	PSOx2 40:5	0	768480	801748	723639	597654	416936	518043	476532	575913	515356	0	0	28448.7	1778407	2.03846e+06	1.75883e+06	425634	451194	647242	114606	975146	905921	1.65166e+06	2.80699e+06	3.1486e+06	132940	110941	268039	561702	606694	756761	PSOx2 40:5	10.1121	12.1099	7.76146	8.6731	5.20444	5.85634	3.5812	9.08957	4.05057	0	0	1.5956	16.0541	17.8083
866.519	H77 C46 N1 O12 P1	0.47ppm	PSOx2 40:6	0	55239	60016.9	72689.3	0	0	0	37784.7	22963.7	57492.7	0	0	0	285558	558238	251326	43315.2	121451	27674.5	129796	207744	168712	125048	277128	300900	18899.5	96741.8	50554.1	64827.1	66286.5	88406.1	PSOx2 40:6	0.726866	0.906518	0.779636	0	0	0	0.283957	0.362434	0.451879	0	0	0	2.5778	4.87685
864.504	H75 C46 N1 O12 P1	0.80ppm	PSOx2 40:7	0	0	0	0	0	0	0	8265.5	0	5435.4	0	0	0	142977	742071	122921	9156.9	0	15649.6	0	40647	33060.6	58790.6	118071	79158.7	0	0	5358.7	0	15901.1	11844.9	PSOx2 40:7	0	0	0	0	0	0	0.0621164	0	0.042721	0	0	0	1.29069	6.48283
862.487	H73 C46 N1 O12 P1	-0.34ppm	PSOx2 40:8	0	0	0	0	24201.1	11646	16308.6	0	0	0	0	0	0	0	0	0	6223	0	0	0	0	0	0	0	0	18274.1	7122.8	16266.4	13333.4	16522.6	17802.5	PSOx2 40:8	0	0	0	0.351204	0.145372	0.184365	0	0	0	0	0	0	0	0
816.504	H75 C42 N1 O12 P1	1.48ppm	PSOx2 36:3	6361.8	57850.5	33384.8	39608.1	0	0	0	5128.3	18824.6	6687.9	0	219497	0	155670	178490	144552	20786.2	34720.2	45273.1	116208	334296	304956	203623	409852	382818	27447.3	23653.2	63741	32020.3	56441.6	57232.4	PSOx2 36:3	0.761229	0.504257	0.42482	0	0	0	0.0385399	0.297107	0.0525653	0	10.7425	0	1.40527	1.55932
900.598	H87 C48 N1 O12 P1	0.46ppm	PSOx2 42:3	0	164273	170812	184677	144205	98529.7	120114	110358	78430	130673	166170	330733	216393	201679	476374	225816	148811	369224	222784	513828	5.60059e+06	4.26921e+06	1.38891e+06	3130925	2607196	82382.8	200282	151321	121798	138624	165946	PSOx2 42:3	2.16159	2.58001	1.98077	2.09268	1.2299	1.35786	0.829353	1.23785	1.02706	8.34622	16.1866	12.1368	1.8206	4.16166
898.583	H85 C48 N1 O12 P1	1.28ppm	PSOx2 42:4	0	71229.2	78513	74223.9	15474.3	43656.1	52542.9	248718	212743	216288	0	0	0	315113	300042	287552	41009.4	31027.2	44975.8	99081.1	953119	918489	338572	542149	649680	21332.3	29872	42307.2	1.94206e+06	3.00931e+06	2057263	PSOx2 42:4	0.937274	1.18589	0.796095	0.224562	0.54494	0.593984	1.86915	3.35769	1.69997	0	0	0	2.84461	2.62121
896.567	H83 C48 N1 O12 P1	1.00ppm	PSOx2 42:5	0	434257	506667	516075	177725	74743.2	133374	317674	605335	363848	0	0	0	2.21725e+06	2.41858e+06	2.22768e+06	118316	113728	162941	109386	1.20302e+06	977902	1.28507e+06	2.7523e+06	2.44862e+06	18184.2	12164.1	58704.6	462628	483378	609927	PSOx2 42:5	5.71419	7.65289	5.53521	2.57913	0.932987	1.50776	2.38736	9.55394	2.85976	0	0	0	20.0157	21.1291
894.551	H81 C48 N1 O12 P1	1.18ppm	PSOx2 42:6	0	475201	333382	483083	96602.3	83981	110720	239109	164318	294498	0	0	0	1.44619e+06	1.50682e+06	1.3935e+06	168640	206128	240589	63328.7	890736	769608	1.30696e+06	1981863	1.94663e+06	88002.4	173596	194486	209275	201279	304392	PSOx2 42:6	6.25296	5.03552	5.18135	1.40188	1.0483	1.25167	1.79694	2.59341	2.31469	0	0	0	13.0551	13.1638
892.535	H79 C48 N1 O12 P1	0.79ppm	PSOx2 42:7	0	373694	292798	321430	260646	131366	121676	234024	131340	241965	0	0	0	1.50838e+06	1.65948e+06	1.50112e+06	304354	343510	484646	102283	884532	352721	1.285e+06	2.69294e+06	2.55922e+06	80037.8	160105	192593	274148	241348	318925	PSOx2 42:7	4.91727	4.42253	3.44753	3.78246	1.63979	1.37552	1.75873	2.07292	1.90179	0	0	0	13.6165	14.4975
890.519	H77 C48 N1 O12 P1	-0.20ppm	PSOx2 42:8	72630.9	58256.1	38127.5	24161.7	87716.4	110140	125068	40693.5	35993.2	48252.9	0	0	0	56711.3	167135	51261.6	87214.7	137039	47416.5	47909.8	200992	198205	29663.2	198359	267571	61194.6	69749.8	91282.9	197562	140712	216678	PSOx2 42:8	0.766566	0.575892	0.259149	1.27293	1.37483	1.41386	0.305817	0.568077	0.379256	0	0	0	0.511947	1.46011
###	PhosphatidylserineOx3
922.639	H93 C48 N1 O13 P1	-0.21ppm	PSOx3 42:0	0	0	0	0	0	0	0	87897.1	56870.6	66773.4	0	0	0	105492	168808	114067	0	0	0	0	0	0	0	0	0	0	0	0	1.10334e+06	1.38914e+06	1.3151e+06	PSOx3 42:0	0	0	0	0	0	0	0.660559	0.897582	0.524823	0	0	0	0.952303	1.47473
808.496	H75 C40 N1 O13 P1	-2.02ppm	PSOx3 34:1	13407.7	0	0	0	0	0	0	0	0	0	0	0	0	0	0	0	0	0	0	0	0	0	0	0	0	10093.5	18094.1	26080.8	0	0	0	PSOx3 34:1	0	0	0	0	0	0	0	0	0	0	0	0	0	0
918.607	H89 C48 N1 O13 P1	-0.95ppm	PSOx3 42:2	0	0	0	0	0	0	0	0	0	0	699181	596630	804777	0	18532.7	0	0	0	0	25378.9	0	0	0	0	0	5029.3	7313.1	6743.6	0	0	0	PSOx3 42:2	0	0	0	0	0	0	0	0	0	35.1177	29.1999	45.1374	0	0.161904
854.483	H73 C44 N1 O13 P1	0.53ppm	PSOx3 38:6	0	0	0	0	0	0	0	0	0	0	0	0	0	0	0	0	0	0	0	0	0	0	0	0	0	5370.5	0	0	0	0	0	PSOx3 38:6	0	0	0	0	0	0	0	0	0	0	0	0	0	0
852.466	H71 C44 N1 O13 P1	-0.57ppm	PSOx3 38:7	0	0	13328.2	0	0	0	0	0	0	0	0	0	0	0	0	0	0	0	0	0	0	0	0	0	0	0	0	0	0	6808.5	0	PSOx3 38:7	0	0.201314	0	0	0	0	0	0	0	0	0	0	0	0
882.515	H77 C46 N1 O13 P1	1.61ppm	PSOx3 40:6	0	0	13059.9	0	0	0	0	0	0	0	0	0	0	0	0	0	0	0	0	0	0	0	0	0	0	0	0	0	0	0	0	PSOx3 40:6	0	0.197262	0	0	0	0	0	0	0	0	0	0	0	0
880.499	H75 C46 N1 O13 P1	0.61ppm	PSOx3 40:7	0	0	0	0	0	0	0	0	0	0	0	0	0	0	0	0	0	0	0	0	0	0	0	0	0	0	0	0	0	11625.6	0	PSOx3 40:7	0	0	0	0	0	0	0	0	0	0	0	0	0	0
878.482	H73 C46 N1 O13 P1	-0.26ppm	PSOx3 40:8	7834.8	0	0	0	0	12307.2	15106.6	0	0	0	0	0	0	0	0	0	0	0	0	0	0	0	0	0	0	13982.3	7835	14096.9	33146.3	0	17713.2	PSOx3 40:8	0	0	0	0	0.153625	0.170776	0	0	0	0	0	0	0	0
826.45	H69 C42 N1 O13 P1	-1.61ppm	PSOx3 36:6	0	0	0	0	207403	261492	280337	0	0	0	0	0	0	0	0	0	0	0	0	0	0	0	0	0	0	0	0	0	0	0	0	PSOx3 36:6	0	0	0	3.00981	3.26409	3.16913	0	0	0	0	0	0	0	0
830.484	H73 C42 N1 O13 P1	1.67ppm	PSOx3 36:4	0	0	0	0	0	0	0	0	0	0	0	72606.4	0	0	0	0	0	0	0	0	0	0	122944	0	0	0	0	0	0	0	0	PSOx3 36:4	0	0	0	0	0	0	0	0	0	0	3.55346	0	0	0
906.513	H77 C48 N1 O13 P1	-1.12ppm	PSOx3 42:8	17257.8	0	0	0	0	11594.3	0	0	0	0	0	0	0	0	0	0	0	0	0	0	0	0	0	0	0	11338.5	17169.8	26096.8	52371.6	18668.4	65395.5	PSOx3 42:8	0	0	0	0	0.144727	0	0	0	0	0	0	0	0	0
[truncated: 46 more columns]

## Sheet: LPS
																																				Normalizatioon
				0	Lipo 1	Lipo 1 + Fento	Lipo 1 + Fento + Toc	PDAC 1	PDAC1 + Fento	PDAC1 + Fento + Toc	PDAC 2	PDAC2 + Fento	PDAC2 + Fento + Toc	PDAC 3	PDAC3 + Fento	PDAC3 + Fento + Toc	Angio breast	Angio breast + Fento	Angio breast + Fento + Toc	Lipo 2	Lipo 2 + Fento	Lipo 2 + Fento + Toc	Lipo 3	Lipo 3 + Fento	Lipo 3 + Fento + Toc	Lipo 4	Lipo 4 + Fento	Lipo 4 + Fento + Toc	Lipo 5	Lipo 5 + Fento	Lipo 5 + Fento + Toc	UPS	UPS + Fento	UPS + Fento + Toc	PS nmol	766.426	726.009	745.463	884.58	592.002	635.639	212.838	252.18	212.762	162.259	143.907	183.689	1538.3	1525.14
508.268	H43 C23 N1 O9 P1	-0.15ppm	LPS 17:1	1.48083e+07	6.96106e+06	5.50375e+06	5.31283e+06	6.06427e+06	6119624	6252789	9.43884e+06	9.23921e+06	8.98502e+06	1.41967e+06	2.27736e+06	1.23693e+06	3.58007e+06	3.33811e+06	3.38158e+06	4.67408e+06	5.03733e+06	6.84737e+06	9.56125e+06	1.55726e+06	1.69924e+06	2.85642e+06	4.74286e+06	4.57286e+06	8.43271e+06	5.18567e+06	8.14309e+06	6.09029e+06	6.8326e+06	6.82899e+06		Lipo 1	Lipo 1 + Fento	Lipo 1 + Fento + Toc	PDAC 1	PDAC1 + Fento	PDAC1 + Fento + Toc	PDAC 2	PDAC2 + Fento	PDAC2 + Fento + Toc	PDAC 3	PDAC3 + Fento	PDAC3 + Fento + Toc	Angio breast	Angio breast + Fento
496.268	H43 C22 N1 O9 P1	0.42ppm	LPS 16:0	0	14839.6	0	0	0	0	0	15226.7	18914	9469.2	311908	250013	145063	55221	87040.5	105643	23889.7	9925.6	21776.8	49482	118111	141310	0	11011.5	10308.9	0	0	0	38161.6	51401	29411.8	LPS 16:0	0.0639541	0	0	0	0	0	0.0483959	0.0614144	0.0316166	6.59116	3.29346	3.5183	0.462737	0.782243
524.299	H47 C24 N1 O9 P1	0.04ppm	LPS 18:0	9058.1	360338	484103	308742	437982	306526	274251	429629	562634	298249	4.5546e+07	5.5548e+07	4.4722e+07	871720	787659	834540	503450	673500	582349	4635019	3.67632e+06	4.26408e+06	1.13529e+06	1.38158e+06	2.08232e+06	115399	84147.6	16614.4	1.15677e+06	2.14414e+06	1.29542e+06	LPS 18:0	1.55295	2.63876	1.74338	2.1667	1.50267	1.31582	1.36551	1.82689	0.995822	962.465	731.742	1084.67	7.30478	7.07878
520.268	H43 C24 N1 O9 P1	-0.31ppm	LPS 18:2	0	12283.3	0	0	0	0	0	0	0	0	0	0	0	0	0	0	95087.6	76506.9	71745.9	112347	83411	54900.3	0	14075.8	40271.7	32703.7	18809.5	25050.8	50652.1	52833	57969.6	LPS 18:2	0.0529372	0	0	0	0	0	0	0	0	0	0	0	0	0
552.331	H51 C26 N1 O9 P1	0.52ppm	LPS 20:0	0	27197.4	29866.9	29874.6	72631.8	37134.9	47154.7	46898.3	40092.2	52022.5	3.88476e+06	3.78111e+06	3.68548e+06	50769.1	81052.5	55622.6	71874.6	80168	91621.8	65337	440104	412083	66160.6	91307.2	180524	28644.2	37120.8	49888	34855.5	48615.9	43391.1	LPS 20:0	0.117212	0.162799	0.168693	0.35931	0.182045	0.226242	0.14906	0.130181	0.173698	82.0917	49.8091	89.3865	0.425432	0.728428
550.315	H49 C26 N1 O9 P1	0.45ppm	LPS 20:1	0	6327.4	0	0	0	0	0	11031.7	20075.7	5210.6	1.36308e+06	1323285	1.28507e+06	0	0	0	18224.5	8218.5	18073.6	1127371	950229	1.0466e+06	111057	154336	212021	0	0	0	14139.2	9203.1	6041	LPS 20:1	0.0272691	0	0	0	0	0	0.0350627	0.0651864	0.0173976	28.8043	17.4318	31.1677	0	0
548.3	H47 C26 N1 O9 P1	1.16ppm	LPS 20:2	0	0	0	100631	0	0	0	3697.1	0	0	47577.8	94888.6	0	0	0	0	0	0	0	12404.4	226842	172573	720450	0	0	0	0	0	25455.1	0	0	LPS 20:2	0	0	0.568233	0	0	0	0.0117507	0	0	1.0054	1.24998	0	0	0
544.268	H43 C26 N1 O9 P1	-0.45ppm	LPS 20:4	0	10313.8	0	0	0	0	0	14848.4	7129.6	6761.9	0	0	0	0	15632.9	20770.8	21753.8	18106.4	16970.4	0	0	0	0	0	0	3987.9	5227	0	40195.7	48803.3	41705.3	LPS 20:4	0.0444493	0	0	0	0	0	0.0471935	0.02315	0.0225773	0	0	0	0	0.140495
580.362	H55 C28 N1 O9 P1	0.32ppm	LPS 22:0	0	380780	430929	360111	730128	532449	553110	470699	527182	424424	7.01519e+06	9.82348e+06	5657584	426456	421325	328308	365757	423320	494214	3979695	2.0143e+06	1.87731e+06	186167	465915	604956	221916	294021	271432	313702	438689	347046	LPS 22:0	1.64105	2.34892	2.03344	3.61195	2.6102	2.65375	1.49605	1.71178	1.41711	148.243	129.406	137.217	3.57359	3.7865
578.346	H53 C28 N1 O9 P1	0.21ppm	LPS 22:1	0	103246	94390.9	91635.8	62720.1	32727.3	43877.4	51451.5	36793.9	47772.9	2614359	2.25736e+06	2.33875e+06	134275	122430	84141.4	91404.5	94050	109911	68836.2	526848	535494	145801	270692	289590	21180.2	41070.2	46218	117027	140179	126428	LPS 22:1	0.444958	0.514509	0.51744	0.310277	0.160438	0.210518	0.163531	0.119471	0.159509	55.2459	29.7366	56.7232	1.12519	1.10029
576.33	H51 C28 N1 O9 P1	-0.70ppm	LPS 22:2	0	0	0	0	0	0	0	0	5191.3	0	55546.8	0	0	0	0	0	0	0	0	0	23812.8	16864.8	225159	234001	0	0	0	4070.4	0	0	0	LPS 22:2	0	0	0	0	0	0	0	0.0168563	0	1.1738	0	0	0	0
572.299	H47 C28 N1 O9 P1	-0.14ppm	LPS 22:4	0	0	6260.8	0	0	0	0	0	0	0	0	0	0	12291.1	33760.2	24558.2	0	0	0	0	15355.2	27738.3	0	0	0	0	0	0	12635	6341.7	12150.7	LPS 22:4	0	0.0341265	0	0	0	0	0	0	0	0	0	0	0.102996	0.303407
570.283	H45 C28 N1 O9 P1	-0.83ppm	LPS 22:5	0	0	4029.4	7188.8	0	0	0	0	3680.5	0	0	0	0	12334.4	0	21016.6	0	0	0	0	0	0	107700	234679	0	6843.4	0	0	13712.4	6727.9	12099.6	LPS 22:5	0	0.0219636	0.040593	0	0	0	0	0.0119507	0	0	0	0	0.103359	0
568.268	H43 C28 N1 O9 P1	0.37ppm	LPS 22:6	5858.2	0	0	0	0	0	0	0	0	0	0	0	0	0	9293.1	27661.1	12537.9	5224.4	12026.4	0	18301.1	14128.3	26530.8	2356.3	40513.2	0	0	0	0	5840.7	5647.3	LPS 22:6	0	0	0	0	0	0	0	0	0	0	0	0	0	0.0835181
																																				0	0	0	0	0	0	0	0	0	0	0	0	0	0
[truncated: 46 more columns]

## Sheet: PI and PIOx
																																				Normalization
				0	Lipo 1	Lipo 1 + Fento	Lipo 1 + Fento + Toc	PDAC 1	PDAC1 + Fento	PDAC1 + Fento + Toc	PDAC 2	PDAC2 + Fento	PDAC2 + Fento + Toc	PDAC 3	PDAC3 + Fento	PDAC3 + Fento + Toc	Angio breast	Angio breast + Fento	Angio breast + Fento + Toc	Lipo 2	Lipo 2 + Fento	Lipo 2 + Fento + Toc	Lipo 3	Lipo 3 + Fento	Lipo 3 + Fento + Toc	Lipo 4	Lipo 4 + Fento	Lipo 4 + Fento + Toc	Lipo 5	Lipo 5 + Fento	Lipo 5 + Fento + Toc	UPS	UPS + Fento	UPS + Fento + Toc	PI in nmol	1398.6	1130.09	1342.95	1880	1376.27	1436.87	324.654	318.076	336.146	565.148	554.147	634.448	10630.9	9434.44
809.519	H78 C41 O13 P1	0.80ppm	PI 32:0	6792979	2.67788e+06	2.57852e+06	3.08897e+06	2.72568e+06	3.44847e+06	3.17742e+06	4.16737e+06	3.92249e+06	4.12037e+06	2.6852e+06	2.37239e+06	2.71292e+06	1.11632e+06	1.39687e+06	940858	1.12696e+06	1.72893e+06	3319447	3.99316e+06	1.2187e+06	1.22904e+06	762709	1.50741e+06	1.50378e+06	2.93749e+06	2.30778e+06	4.64026e+06	1.76991e+06	2.07301e+06	2.07458e+06		Lipo 1	Lipo 1 + Fento	Lipo 1 + Fento + Toc	PDAC 1	PDAC1 + Fento	PDAC1 + Fento + Toc	PDAC 2	PDAC2 + Fento	PDAC2 + Fento + Toc	PDAC 3	PDAC3 + Fento	PDAC3 + Fento + Toc	Angio breast	Angio breast + Fento
837.549	H82 C43 O13 P1	-0.43ppm	PI 34:0	0	0	0	0	930678	769893	802854	42007.5	82712.7	53354.7	2.17119e+06	1.88437e+06	2.55308e+06	523623	0	281868	89328.1	206400	0	82839.4	974745	1.00552e+06	213393	0	413141	20262.5	3365.8	0	51845	100980	123207	PI 34:0	-3.17416e-05	-3.29647e-05	-2.75173e-05	17.0724	11.1628	12.6337	0.504005	1.05434	0.64745	40.4289	39.7145	47.0541	23.453	-6.08503e-05
865.581	H86 C45 O13 P1	0.15ppm	PI 36:0	0	33388.2	19535.3	39608.7	1.16769e+06	1.34626e+06	910375	0	0	0	663249	503960	645048	157713	157746	0	61698.2	165463	70302.1	0	0	-1.7	66670.3	176223	241429	0	0	0	566203	658657	619675	PI 36:0	0.623408	0.378809	0.641132	21.4202	19.5197	14.3257	0	0	0	12.3501	10.6213	11.8884	7.06395	5.64641
893.612	H90 C47 O13 P1	-0.88ppm	PI 38:0	0	109819	168586	210836	35918.4	52263.9	27748.6	25762.4	13408.1	35684.7	0	0	0	850135	961209	603203	87959.5	117686	122737	0	0	0	39959.5	476671	326145	52069.3	47821.3	86716.2	103779	108952	72304.5	PI 38:0	2.05048	3.26904	3.41273	0.658888	0.757784	0.436653	0.309097	0.170913	0.433027	0	0	0	38.0775	34.4058
835.535	H80 C43 O13 P1	0.51ppm	PI 34:1	0	1.45267e+06	1.07757e+06	1585630	7.59567e+06	7.37826e+06	7.06737e+06	1.08779e+06	839926	1115631	6.3968e+06	5.39008e+06	6656657	1.03445e+07	1.00254e+07	8.36424e+06	2.50836e+06	3.28583e+06	5.31221e+06	972790	1.03797e+07	1.02789e+07	5.75127e+06	9.54989e+06	1.10241e+07	528912	523913	1.01238e+06	1.37027e+06	1.64094e+06	1.59784e+06	PI 34:1	27.1235	20.8952	25.666	139.335	106.979	111.212	13.0513	10.7065	13.538	119.112	113.6	122.684	463.331	358.853
863.566	H84 C45 O13 P1	0.79ppm	PI 36:1	0	981088	737454	1.13371e+06	1.12081e+07	1.08796e+07	1.07407e+07	606210	684084	732640	5.58754e+06	5.05143e+06	6.16597e+06	1.23866e+07	1.57396e+07	1.02961e+07	1.89087e+06	2.81565e+06	4.29878e+06	290719	3.57279e+06	3.49677e+06	3.91737e+06	6.34715e+06	6.9476e+06	357456	362114	527748	4.45796e+06	5117060	5.12885e+06	PI 36:1	18.3184	14.3	18.3509	205.601	157.745	169.016	7.2733	8.72002	8.89045	104.043	106.463	113.641	554.794	563.387
891.597	H88 C47 O13 P1	0.27ppm	PI 38:1	0	72448.2	74057.8	91588.6	192406	301594	257308	7400.6	6553.4	16565.4	169624	168110	109579	387596	354644	303454	45876.4	103478	116820	23408.1	240792	304146	164476	336135	411179	7111.2	5413.4	17451.8	126970	153783	155073	PI 38:1	1.35272	1.43605	1.48251	3.5295	4.37287	4.04901	0.0887923	0.0835362	0.201018	3.15849	3.54305	2.01958	17.3604	12.6942
807.503	H76 C41 O13 P1	0.50ppm	PI 32:1	0	61906.7	48492.8	44063.2	502088	447417	424154	67914.5	60589	68736.6	243955	104347	274576	651639	810967	629485	156061	165553	232519	46983.3	657838	608892	229538	439623	464989	9692.7	29577.5	14844.9	74340.5	74849.2	75702.1	PI 32:1	1.15589	0.940323	0.713235	9.21032	6.48718	6.67451	0.814837	0.772328	0.834106	4.5426	2.19919	5.06052	29.1869	29.028
833.519	H78 C43 O13 P1	1.18ppm	PI 34:2	0	342121	325574	379640	2.63951e+06	2.42942e+06	2.38381e+06	245365	266343	257790	601753	490516	758939	1.9851e+06	2.18319e+06	1.66791e+06	1.11277e+06	1.59709e+06	2.06504e+06	200155	2.31601e+06	2.20039e+06	1.65016e+06	3.47117e+06	3.72007e+06	288641	292067	428366	646759	676223	713017	PI 34:2	6.38791	6.31321	6.1451	48.4192	35.2246	37.5117	2.94389	3.39508	3.12824	11.205	10.338	13.9875	88.9124	78.1458
861.551	H82 C45 O13 P1	0.74ppm	PI 36:2	0	3.04646e+06	2.31875e+06	3.2012e+06	1.33631e+07	1.29272e+07	1.26677e+07	1365600	1288741	1.34028e+06	2.41409e+06	2.0698e+06	2.51004e+06	1.43026e+07	15213103	1.20461e+07	3297129	4.68362e+06	6.91925e+06	6039161	7.33003e+06	7191929	1.13915e+07	2.20428e+07	2.23956e+07	1.67862e+06	1.53493e+06	2.80499e+06	5889790	6.82006e+06	6.79891e+06	PI 36:2	56.8821	44.9629	51.8168	245.134	187.434	199.339	16.3844	16.4276	16.264	44.9519	43.6226	46.2608	640.612	544.542
889.582	H86 C47 O13 P1	0.76ppm	PI 38:2	0	307799	198006	182722	1.29223e+06	1.21555e+06	1.17057e+06	86080.9	76679.2	91960.3	722490	651119	814832	1.45023e+06	1.73442e+06	1.20823e+06	123660	209381	244420	2663173	2.78969e+06	2.63523e+06	2.83889e+06	4.33201e+06	4.86048e+06	82668	87262.5	128662	551370	601412	814993	PI 38:2	5.74707	3.83954	2.95766	23.7046	17.6245	18.4201	1.0328	0.97743	1.11592	13.4532	13.7228	15.0176	64.9557	62.0822
917.612	H90 C49 O13 P1	0.03ppm	PI 40:2	0	0	0	0	0	0	0	0	0	0	0	0	0	131794	83995.1	118242	0	0	0	0	255246	233762	0	0	0	0	0	0	0	0	0	PI 40:2	0	0	0	0	0	0	0	0	0	0	0	0	5.90304	3.00654
805.488	H74 C41 O13 P1	1.19ppm	PI 32:2	0	0	0	0	0	35734.8	9436.9	0	0	13558.6	0	0	0	0	0	0	40562.9	42401.9	40853.4	0	0	0	0	14212.3	0	0	0	0	0	0	0	PI 32:2	0	0	0	0	0.518125	0.148499	0	0	0.164531	0	0	0	0	0
859.535	H80 C45 O13 P1	0.75ppm	PI 36:3	0	1.25254e+06	1.0505e+06	1.31113e+06	3.35136e+06	3.13607e+06	3.039e+06	520128	494470	547788	551876	674598	822450	3.06198e+06	3.18764e+06	2.40185e+06	690774	960157	1.18994e+06	1895523	2.96318e+06	2.7547e+06	5.16562e+06	9.79703e+06	1.07483e+07	718978	763538	1.12212e+06	1.18963e+06	1.31568e+06	1.38406e+06	PI 36:3	23.3869	20.3702	21.2228	61.4774	45.4705	47.8218	6.24049	6.30301	6.64731	10.2763	14.2177	15.158	137.146	114.099
831.502	H76 C43 O13 P1	-0.66ppm	PI 34:3	0	5892.6	6361.8	0	57356.6	87227.9	86360.1	0	2832.6	3637.4	0	0	0	61994.5	55302.9	64240.5	44741.2	75072.8	80087.4	0	116965	65356.8	0	55247.2	159596	-1.7	-1.7	10041.8	1393.1	2143.7	22220.4	PI 34:3	0.110024	0.123362	0	1.05215	1.26473	1.35897	0	0.0361071	0.0441392	0	0	0	2.77673	1.97953
857.519	H78 C45 O13 P1	0.87ppm	PI 36:4	30414.3	2.13287e+06	1672351	2.19657e+06	3.82616e+06	3.42952e+06	3341831	1.09245e+06	1.06576e+06	1.16877e+06	792346	648005	926699	8.07521e+06	8.78733e+06	6.8387e+06	1022545	1.41371e+06	2.02775e+06	1321259	1.53832e+06	1.4313e+06	5.60908e+06	9.22459e+06	1.12655e+07	367228	333073	550025	1.50243e+06	1.68966e+06	1792150	PI 36:4	39.8239	32.4285	35.5551	70.1872	49.7252	52.5872	13.1072	13.5852	14.1828	14.754	13.6572	17.0794	361.688	314.536
887.567	H84 C47 O13 P1	1.40ppm	PI 38:3	0	2.83402e+06	2.18319e+06	2.67948e+06	1.35976e+07	1.16647e+07	10363373	2.196e+06	1.85381e+06	2.17916e+06	2.59549e+06	2.22648e+06	3.13048e+06	29142818	3.13483e+07	24897264	1505354	3.60059e+06	1.27707e+06	6047152	6.20053e+06	6.15171e+06	4.05819e+07	5.41565e+07	6.26401e+07	387889	544424	484694	9.88118e+06	1.15027e+07	1.19611e+07	PI 38:3	52.9155	42.3342	43.3718	249.434	169.128	163.078	26.3476	23.6305	26.4437	48.3297	46.9248	57.6957	1305.31	1122.09
885.551	H82 C47 O13 P1	0.71ppm	PI 38:4	0	5.1088e+07	3.98915e+07	5.77254e+07	3.24793e+07	2.93708e+07	2.86218e+07	1.56126e+07	1.44761e+07	1.5681e+07	6.44102e+06	5.73743e+06	7.6951e+06	1.20642e+08	1.31652e+08	1.00673e+08	1.40306e+07	19378563	30963464	11185569	10317461	1.02215e+07	7.34e+07	1.30655e+08	1.43127e+08	6.16028e+06	5.41989e+06	1.06377e+07	3.23946e+07	3.78247e+07	3.82925e+07	PI 38:4	953.89	773.536	934.38	595.801	425.852	450.394	187.32	184.527	190.286	119.936	120.921	141.823	5403.55	4712.38
883.535	H80 C47 O13 P1	0.93ppm	PI 38:5	0	8.26189e+06	6.0149e+06	8.71907e+06	5.32015e+06	4.7915e+06	4.75735e+06	2.9703e+06	2.62821e+06	3.09284e+06	452525	419550	579389	1.16702e+07	12517275	1.0503e+07	1.81322e+06	2.54909e+06	3.84129e+06	4905935	6.97221e+06	6785099	1.09245e+07	19364179	2.03635e+07	984282	859705	1.5798e+06	3328984	3.79178e+06	4.11686e+06	PI 38:5	154.262	116.635	141.132	97.593	69.4729	74.8619	35.6376	33.5018	37.531	8.4263	8.84232	10.6783	522.709	448.047
881.519	H78 C47 O13 P1	1.11ppm	PI 38:6	0	236546	262507	306679	646006	631393	579074	116577	96573.1	128118	42998.5	0	0	749144	845420	619918	160981	196135	243058	0	417437	410402	367201	628403	705974	80043.7	70862.4	136794	203054	226609	219705	PI 38:6	4.41666	5.09027	4.9641	11.8504	9.15469	9.11232	1.39868	1.23102	1.55469	0.800659	0	0	33.5541	30.2612
855.504	H76 C45 O13 P1	1.43ppm	PI 36:5	0	33942.7	65365.6	53388.7	145148	165126	133196	31788.3	43538.2	30465.8	0	0	0	136741	133901	123355	42122.5	40843.5	28151.5	0	0	0	273355	207598	244620	71314.8	47976.3	89056.6	32475	51217.2	40137.4	PI 36:5	0.633761	1.2675	0.864184	2.6626	2.39419	2.09598	0.381395	0.554981	0.369697	0	0	0	6.12461	4.79288
913.582	H86 C49 O13 P1	1.41ppm	PI 40:4	7193.3	753840	661952	971073	1.24381e+06	1.18889e+06	1218503	307699	275795	371951	80753.2	124489	395581	8.53363e+06	1.42189e+07	7.13146e+06	205410	276401	459535	777295	1.10386e+06	984786	1.7513e+06	4.91476e+06	3.78771e+06	70257.2	84865.3	224136	2.54431e+06	3.00772e+06	2.99548e+06	PI 40:4	14.0753	12.8359	15.7184	22.8166	17.238	19.1744	3.69177	3.51556	4.51355	1.50367	2.62371	7.29068	382.221	508.955
911.567	H84 C49 O13 P1	1.08ppm	PI 40:5	0	1.24195e+06	900347	1.49148e+06	1270715	1.18486e+06	1.2191e+06	433496	404978	464189	345513	148792	334714	6.77208e+06	7690329	5.84284e+06	327131	433330	614621	960419	1624871	1.37584e+06	1.9968e+06	3.70563e+06	4069441	188657	176068	305888	1.58243e+06	1.90547e+06	1.79372e+06	PI 40:5	23.189	17.4586	24.1421	23.31	17.1795	19.1839	5.20108	5.16225	5.63285	6.43367	3.1359	6.16889	303.321	275.27
909.551	H82 C49 O13 P1	0.94ppm	PI 40:6	0	470555	474259	506535	1.30243e+06	1.18765e+06	1.21642e+06	190523	217357	215689	77438	0	50991.8	4.40519e+06	4.86548e+06	3.77125e+06	244658	350589	446237	738236	1.20141e+06	871581	667868	1.26847e+06	1.41298e+06	100710	82205.2	146098	777488	887784	959687	PI 40:6	8.78597	9.19636	8.1991	23.8918	17.22	19.1417	2.28589	2.77065	2.61735	1.44194	0	0.939795	197.308	174.156
907.535	H80 C49 O13 P1	0.53ppm	PI 40:7	0	147354	99301.7	121471	280642	255664	235546	41872.8	63273.7	69985	0	0	0	382531	442500	311015	35120.6	36832.4	76019.7	0	232688	234160	117782	283383	331557	0	0	6829.2	93128.3	81304	120742	PI 40:7	2.75132	1.92556	1.96621	5.1481	3.70692	3.70657	0.502389	0.80655	0.849255	0	0	0	17.1336	15.839
905.52	H78 C49 O13 P1	1.28ppm	PI 40:8	0	38304.8	28772	15072.3	37370.2	43629	24589.4	11467.6	11266.2	21227.9	0	0	0	118676	123318	116327	0	8935.4	0	0	0	0	45138	240218	236686	7032.8	0	0	19444.3	0	0	PI 40:8	0.715208	0.557918	0.24397	0.68552	0.632585	0.38694	0.137588	0.14361	0.257597	0	0	0	5.31547	4.41408
943.629	H92 C51 O13 P1	0.99ppm	PI 42:3	0	0	0	0	0	0	0	0	0	0	0	0	0	32045.7	26578.8	11744.4	0	0	0	0	0	0	0	0	0	0	0	0	0	0	0	PI 42:3	0	0	0	0	0	0	0	0	0	0	0	0	1.43533	0.951369
941.614	H90 C51 O13 P1	1.09ppm	PI 42:4	0	0	0	0	0	0	0	0	0	0	0	0	0	98226.7	117589	121857	0	0	0	0	23458.7	14772.6	0	0	0	0	0	0	0	0	15403.9	PI 42:4	0	0	0	0	0	0	0	0	0	0	0	0	4.39957	4.20901
939.598	H88 C51 O13 P1	1.45ppm	PI 42:5	0	0	0	0	0	0	12527.6	0	0	0	0	0	0	181820	176145	139207	0	0	0	0	131485	49188.6	0	39312.4	25693.5	0	0	0	8709.8	23800.9	0	PI 42:5	0	0	0	0	0	0.197135	0	0	0	0	0	0	8.14371	6.30497
937.582	H86 C51 O13 P1	1.38ppm	PI 42:6	0	0	0	0	0	0	0	0	0	0	0	0	0	114828	122039	125040	0	0	0	0	0	57711.2	0	0	23954.1	0	0	0	0	0	0	PI 42:6	0	0	0	0	0	0	0	0	0	0	0	0	5.14313	4.3683
###	PhosphatidylinositolOx1
851.529	H80 C43 O14 P1	-0.11ppm	PIOx1 34:1	0	0	0	0	0	0	0	0	0	0	0	0	0	0	0	0	12208.6	37263.1	18368.6	0	0	0	0	0	0	0	0	0	0	0	0	PIOx1 34:1	0	0	0	0	0	0	0	0	0	0	0	0	0	0
849.512	H78 C43 O14 P1	-1.45ppm	PIOx1 34:2	0	0	0	0	0	0	0	0	0	0	0	0	0	0	0	0	0	0	0	0	0	0	0	0	0	0	0	0	0	0	0	PIOx1 34:2	0	0	0	0	0	0	0	0	0	0	0	0	0	0
877.544	H82 C45 O14 P1	-0.38ppm	PIOx1 36:2	0	0	0	0	0	0	0	0	0	0	49529.5	0	0	0	0	0	0	8071.7	0	0	0	0	0	0	0	0	0	0	0	0	9924.3	PIOx1 36:2	0	0	0	0	0	0	0	0	0	0.92227	0	0	0	0
845.481	H74 C43 O14 P1	-1.22ppm	PIOx1 34:4	0	0	0	0	0	0	0	0	0	0	0	0	0	0	0	0	0	0	0	0	0	0	0	0	0	0	0	0	0	0	0	PIOx1 34:4	0	0	0	0	0	0	0	0	0	0	0	0	0	0
903.56	H84 C47 O14 P1	-0.36ppm	PIOx1 38:3	0	0	0	0	0	0	0	0	0	0	0	0	0	0	0	0	0	0	0	0	0	0	0	0	0	0	0	0	9701.5	0	16116.8	PIOx1 38:3	0	0	0	0	0	0	0	0	0	0	0	0	0	0
901.546	H82 C47 O14 P1	0.87ppm	PIOx1 38:4	0	59230.6	68918.4	77162	44162.7	124890	48186.9	74535.6	110032	61940.4	0	0	0	130920	172028	118278	12976.4	9337.1	16928.2	0	0	0	19043.5	191879	94577	15228.1	35572.8	10005.8	204188	247827	218091	PIOx1 38:4	1.10592	1.3364	1.24899	0.810122	1.81081	0.758271	0.894277	1.40258	0.751636	0	0	0	5.86389	6.1576
899.53	H80 C47 O14 P1	0.56ppm	PIOx1 38:5	0	43081.2	32003.9	8526.3	0	31281.8	0	54266.2	71345.7	18635.4	0	0	0	24451.7	22183.9	0	0	0	0	0	0	0	136330	0	20037	0	11571.5	0	110151	121399	111189	PIOx1 38:5	0.804391	0.620587	0.138012	0	0.453561	0	0.651085	0.909443	0.226137	0	0	0	1.09519	0.794056
###	PhosphatidylinositolOx2
925.602	H90 C47 O15 P1	-0.68ppm	PIOx2 38:0	0	6018.4	0	0	0	0	0	0	0	0	0	0	0	30219.4	11423.4	3020.8	0	0	0	31391.9	236859	321636	84650.5	138241	211725	0	0	0	0	0	0	PIOx2 38:0	0.112373	0	0	0	0	0	0	0	0	0	0	0	1.35353	0.408892
867.523	H80 C43 O15 P1	-1.73ppm	PIOx2 34:1	0	0	0	0	0	0	0	0	-1.7	-1.7	0	0	0	256673	262355	166992	500.2	1200	1124.6	4711.6	0	0	0	0	5266.8	0	1664.6	0	0	0	0	PIOx2 34:1	0	0	0	0	0	0	0	-2.16699e-05	-2.06292e-05	0	0	0	11.4964	9.3908
923.586	H88 C47 O15 P1	-1.23ppm	PIOx2 38:1	0	13236	23436	19901	12110	30221	25000	5753.1	7823.2	7100	34352	56823	12321	55542.1	93215.9	88399.8	0	0	0	15344.3	445461	221244	15634.4	118588	18404	10002	12009	12311	23432	30091	29878.3	PIOx2 38:1	0.247136	0.454447	0.32213	0.222146	0.43818	0.393401	0.0690256	0.0997223	0.0861572	0.639656	1.19759	0.22708	2.48773	3.33659
921.571	H86 C47 O15 P1	-0.14ppm	PIOx2 38:2	0	0	0	0	0	0	0	0	0	0	33690.3	0	0	0	24644.8	11996.3	0	0	0	0	137177	128696	17556.2	56613.9	51997	0	0	0	0	0	0	PIOx2 38:2	0	0	0	0	0	0	0	0	0	0.627334	0	0	0	0.882143
889.509	H78 C45 O15 P1	0.98ppm	PIOx2 36:4	0	0	0	0	13629.2	21046.8	0	0	0	0	0	0	0	0	0	0	0	0	0	0	0	0	0	0	0	0	0	0	0	0	0	PIOx2 36:4	0	0	0	0.250014	0.305161	0	0	0	0	0	0	0	0	0
891.523	H80 C45 O15 P1	-1.68ppm	PIOx2 36:3	2827.5	-1.7	2990.3	0	8468.7	-1.7	0	23430.4	3096.4	-1.7	0	0	0	-1.7	-1.7	-1.7	-1.7	168.2	-1.7	5694.3	10902	3435	38570.4	-1.7	-1.7	27693.7	36938.4	30736.5	11793.9	-1.7	6704.8	PIOx2 36:3	-3.17416e-05	0.0579849	0	0.15535	-2.46486e-05	0	0.281117	0.0394698	-2.06292e-05	0	0	0	-7.6143e-05	-6.08503e-05
919.556	H84 C47 O15 P1	0.25ppm	PIOx2 38:3	0	0	0	0	0	0	0	0	0	0	0	0	0	0	0	14091	0	0	0	0	0	0	45194.4	164016	223356	0	0	0	28241.3	9172.2	30966.2	PIOx2 38:3	0	0	0	0	0	0	0	0	0	0	0	0	0	0
917.54	H82 C47 O15 P1	0.93ppm	PIOx2 38:4	0	70500.3	95887.4	213287	68805.3	59635.7	36201.6	49534.3	77115	64688.5	54566	51714.5	47190.2	131116	221588	132351	14106.2	20759.5	17015.8	0	0	0	30640.9	218650	364801	5773.1	21286.5	46640.3	219660	208096	228088	PIOx2 38:4	1.31635	1.85935	3.4524	1.26217	0.864669	0.56967	0.594312	0.982985	0.784983	1.01605	1.08992	0.86973	5.87268	7.93157
915.525	H80 C47 O15 P1	1.05ppm	PIOx2 38:5	0	0	0	14046.8	0	0	0	0	23913	7032.6	0	0	0	0	17384.2	0	0	0	11948.2	0	0	0	0	0	0	0	0	0	51015.9	89605.6	94869.6	PIOx2 38:5	0	0	0.227371	0	0	0	0	0.304819	0.0853393	0	0	0	0	0.622255
947.588	H88 C49 O15 P1	1.94ppm	PIOx2 40:3	0	0	0	0	44992.2	45797.6	15560.8	0	0	0	0	0	0	0	0	0	5312.1	0	0	14253.9	23438	23482	30132.3	19257.6	0	0	0	0	0	0	0	PIOx2 40:3	0	0	0	0.825338	0.664028	0.244865	0	0	0	0	0	0	0	0
967.554	H84 C51 O15 P1	-1.76ppm	PIOx2 42:7	0	121738	97724.7	25517.8	0	11952.4	38503.3	15491.6	28923.9	30832.3	0	0	0	0	28921.1	28577.9	39295.8	115640	62426.9	0	0	0	63387.1	0	0	39042.2	77668.6	68605.6	93719.8	121059	103794	PIOx2 42:7	2.27303	1.89498	0.413047	0	0.1733	0.605889	0.185868	0.368693	0.374144	0	0	0	0	1.03521
																																				0	0	0	0	0	0	0	0	0	0	0	0	0	0
###	PhosphatidylinositolOx3																																			0	0	0	0	0	0	0	0	0	0	0	0	0	0
905.505	H78 C45 O16 P1	1.46ppm	PIOx3 36:4	0	0	0	0	0	24760	0	6139	5116.9	0	0	0	0	0	0	0	0	0	0	0	0	0	0	0	0	0	0	0	0	0	0	PIOx3 36:4	0	0	0	0	0.359	0	0.0736556	0.0652251	0	0	0	0	0	0
935.552	H84 C47 O16 P1	1.50ppm	PIOx3 38:3	0	0	0	0	19993.6	11988.2	0	0	0	0	0	0	0	0	0	0	0	0	0	0	0	0	0	0	0	0	0	0	9049.8	38757.4	34512.1	PIOx3 38:3	0	0	0	0.366763	0.173819	0	0	0	0	0	0	0	0	0
933.536	H82 C47 O16 P1	1.11ppm	PIOx3 38:4	0	120125	117189	131152	87522.6	154436	105548	166130	180171	108618	0	0	0	139464	133102	80107.6	53922.2	81487.4	89856.2	0	0	0	47261.2	186319	139630	65871.6	61573.7	83716.8	240174	304144	265479	PIOx3 38:4	2.24291	2.27242	2.12291	1.60552	2.23919	1.6609	1.99322	2.29664	1.31806	0	0	0	6.24659	4.7643
931.52	H80 C47 O16 P1	0.98ppm	PIOx3 38:5	0	28371.7	25711.6	8358.7	31574.8	26842.6	24616.7	46773.1	82552.1	33477	0	0	0	0	25550.7	0	0	0	0	0	0	0	0	56710.4	0	0	16640.5	0	104969	119624	107093	PIOx3 38:5	0.529742	0.498573	0.135299	0.579209	0.389196	0.387369	0.561183	1.05229	0.406237	0	0	0	0	0.914569
929.504	H78 C47 O16 P1	1.20ppm	PIOx3 38:6	0	0	0	0	0	0	0	0	0	0	0	0	0	0	0	0	0	0	0	0	0	0	0	0	0	0	0	0	0	9024.4	0	PIOx3 38:6	0	0	0	0	0	0	0	0	0	0	0	0	0	0
981.535	H82 C51 O16 P1	0.17ppm	PIOx3 42:8	0	0	0	0	0	0	0	0	0	0	0	0	0	0	0	0	0	0	0	0	0	0	0	0	0	0	0	0	0	0	0	PIOx3 42:8	0	0	0	0	0	0	0	0	0	0	0	0	0	0
																																				0	0	0	0	0	0	0	0	0	0	0	0	0	0
																																				0	0	0	0	0	0	0	0	0	0	0	0	0	0
###	PhosphatidylinositolOx4																																			0	0	0	0	0	0	0	0	0	0	0	0	0	0
951.547	H84 C47 O17 P1	1.85ppm	PIOx4 38:3	0	0	0	0	0	0	0	0	0	0	0	0	0	0	0	0	0	0	0	0	0	0	0	0	0	0	0	0	0	0	0	PIOx4 38:3	0	0	0	0	0	0	0	0	0	0	0	0	0	0
949.53	H82 C47 O17 P1	0.92ppm	PIOx4 38:4	5254.8	48119.7	46321.8	0	0	0	0	19301.8	31370.9	0	0	0	0	25766.8	67040.2	0	0	6954.2	0	0	0	0	30347.7	102115	0	0	0	0	126684	232737	104483	PIOx4 38:4	0.898467	0.898226	0	0	0	0	0.231583	0.399885	0	0	0	0	1.15409	2.39965
947.514	H80 C47 O17 P1	0.54ppm	PIOx4 38:5	0	0	0	0	0	0	0	0	6162.1	0	0	0	0	0	0	0	0	0	0	0	0	0	0	0	0	0	0	0	0	28285.5	21316.6	PIOx4 38:5	0	0	0	0	0	0	0	0.0785483	0	0	0	0	0	0
																																				0	0	0	0	0	0	0	0	0	0	0	0	0	0
																																				0	0	0	0	0	0	0	0	0	0	0	0	0	0
###	PhosphatidylinositolOx5																																			0	0	0	0	0	0	0	0	0	0	0	0	0	0
967.542	H84 C47 O18 P1	1.81ppm	PIOx5 38:3	0	0	11531.4	0	0	0	0	0	0	0	0	0	0	0	0	0	0	0	0	0	0	0	0	0	0	0	0	0	0	0	0	PIOx5 38:3	0	0.223605	0	0	0	0	0	0	0	0	0	0	0	0
965.525	H82 C47 O18 P1	0.86ppm	PIOx5 38:4	0	0	0	0	0	0	0	14068.9	12346.6	0	0	0	0	0	0	0	0	0	0	0	0	0	0	0	0	0	0	0	12889.4	0	20993.7	PIOx5 38:4	0	0	0	0	0	0	0.168798	0.157382	0	0	0	0	0	0
963.51	H80 C47 O18 P1	0.94ppm	PIOx5 38:5	0	0	0	0	0	0	0	7044	0	0	0	0	0	0	0	0	0	0	0	0	0	0	0	0	0	0	0	0	7452.6	9501.5	0	PIOx5 38:5	0	0	0	0	0	0	0.0845138	0	0	0	0	0	0	0
																																				0	0	0	0	0	0	0	0	0	0	0	0	0	0
																																				0	0	0	0	0	0	0	0	0	0	0	0	0	0
###	PhosphatidylinositolOx6																																			0	0	0	0	0	0	0	0	0	0	0	0	0	0
981.52	H82 C47 O19 P1	0.66ppm	PIOx6 38:4	0	0	0	0	0	0	0	0	0	0	0	0	0	0	0	0	0	0	0	0	0	0	0	0	0	0	0	0	22594.2	23098	13462.9	PIOx6 38:4	0	0	0	0	0	0	0	0	0	0	0	0	0	0
979.505	H80 C47 O19 P1	1.86ppm	PIOx6 38:5	0	0	0	0	0	0	0	6173.5	0	0	0	0	0	0	0	0	0	0	0	0	0	0	0	0	0	0	0	0	0	0	0	PIOx6 38:5	0	0	0	0	0	0	0.0740695	0	0	0	0	0	0	0
[truncated: 46 more columns]
