# Supplementary material for: Activation of lysosomal iron triggers ferroptosis in cancer
Source: Research Square preprint supplement (doi:10.21203/rs.3.rs-4165774/v1), 2024-04-08
Supplement: Supplementary file 4 [file 8f7a4d01ba6976272672f10f.docx]

**Supplementary Information**

**This document includes:**

Supplementary table legends

Flow cytometry gating strategies

Full western blots

Chemical Synthesis

*Synthesis scheme*

*Experimental procedures*

*NMR spectra*

*HRMS spectra of fentomycin*

Absorption/Emission spectra of fentomycin

**Supplementary Table 1 |** Quantitative mass spectrometry-based lipidomics of oxidised phospholipids in HT1080 cells treated with ferroptosis inducers.

**Supplementary Table 2 |** Quantitative mass spectrometry-based lipidomics of oxidised phospholipids in HT1080 cells treated with fentomycin and ferroptosis inhibitors.

**Supplementary Table 3 |** Quantitative mass spectrometry-based lipidomics of lysophospholipids in HT1080 cells treated with fentomycin.

**Supplementary Table 4 |** Quantitative mass spectrometry-based lipidomics of oxidised phospholipids and lysophospholipids of dissociated human tumours treated with fentomycin and tocopherol.

**Supplementary Table 5 |** Quantitative mass spectrometry-based lipidomics of oxidised phospholipids and lysophospholipids of dissociated 4T1 murine tumours.

**Flow cytometry gating strategies**

**
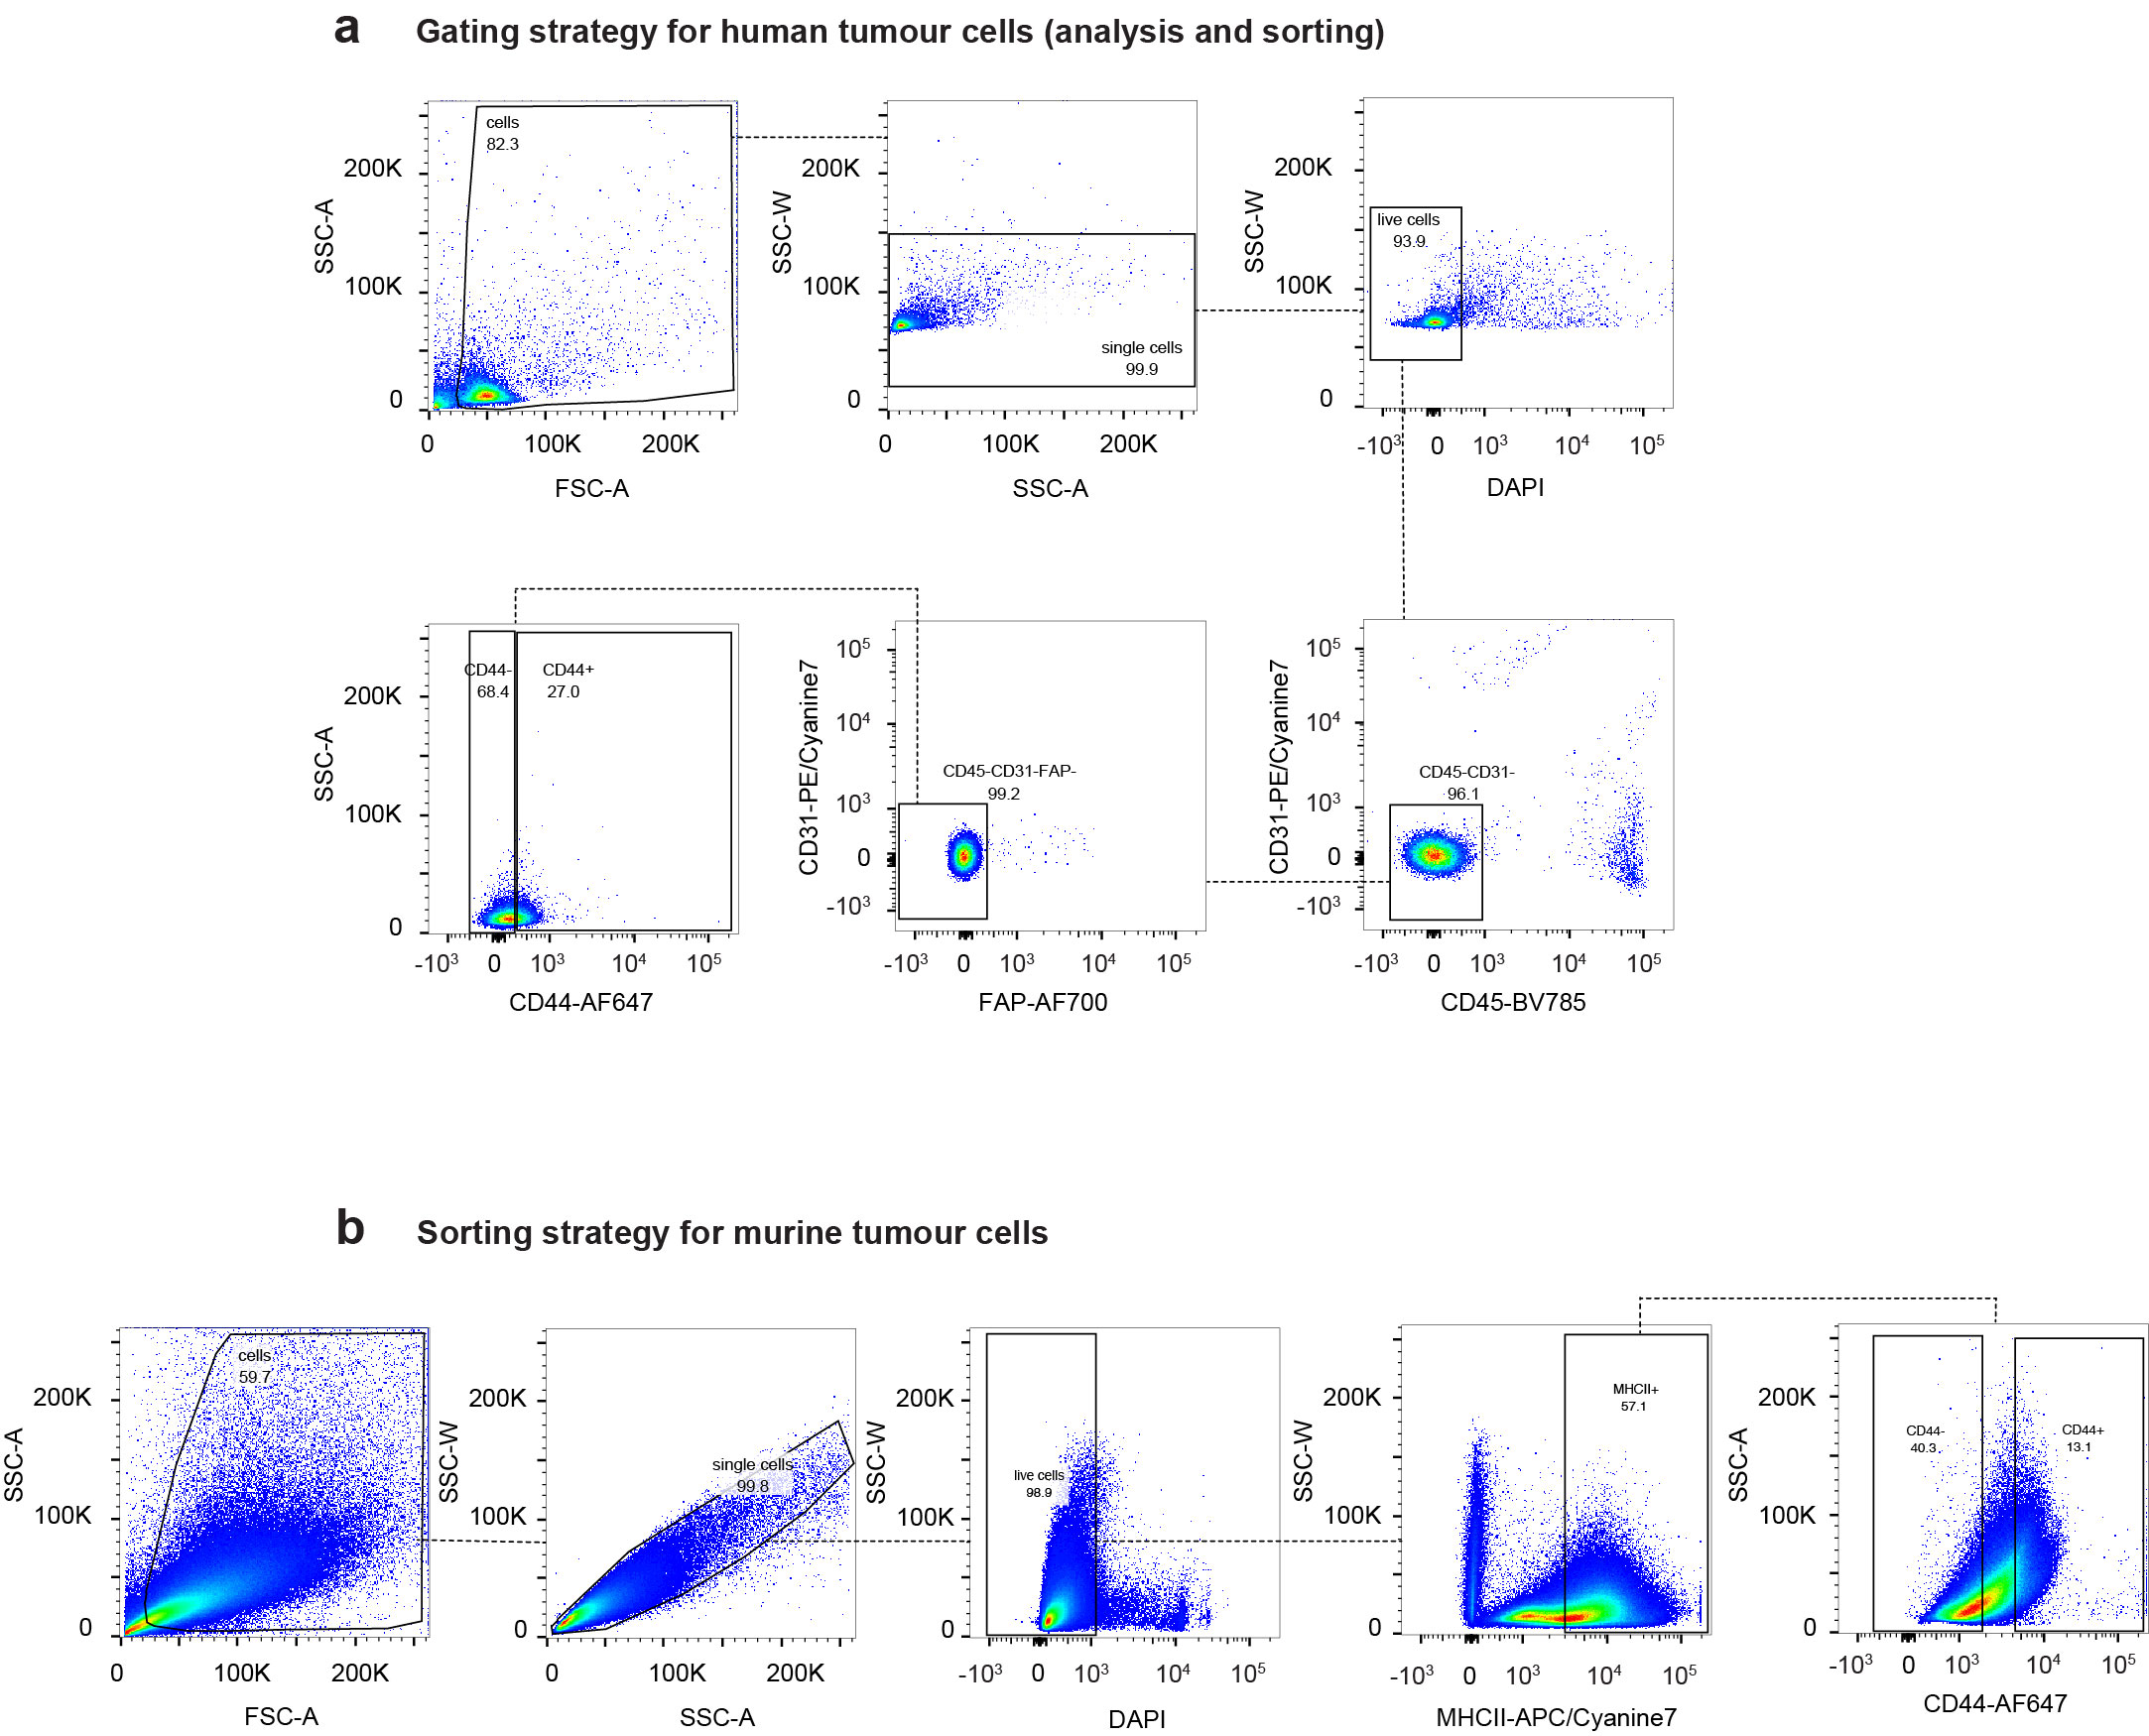
**

**Western blot raw data**

**
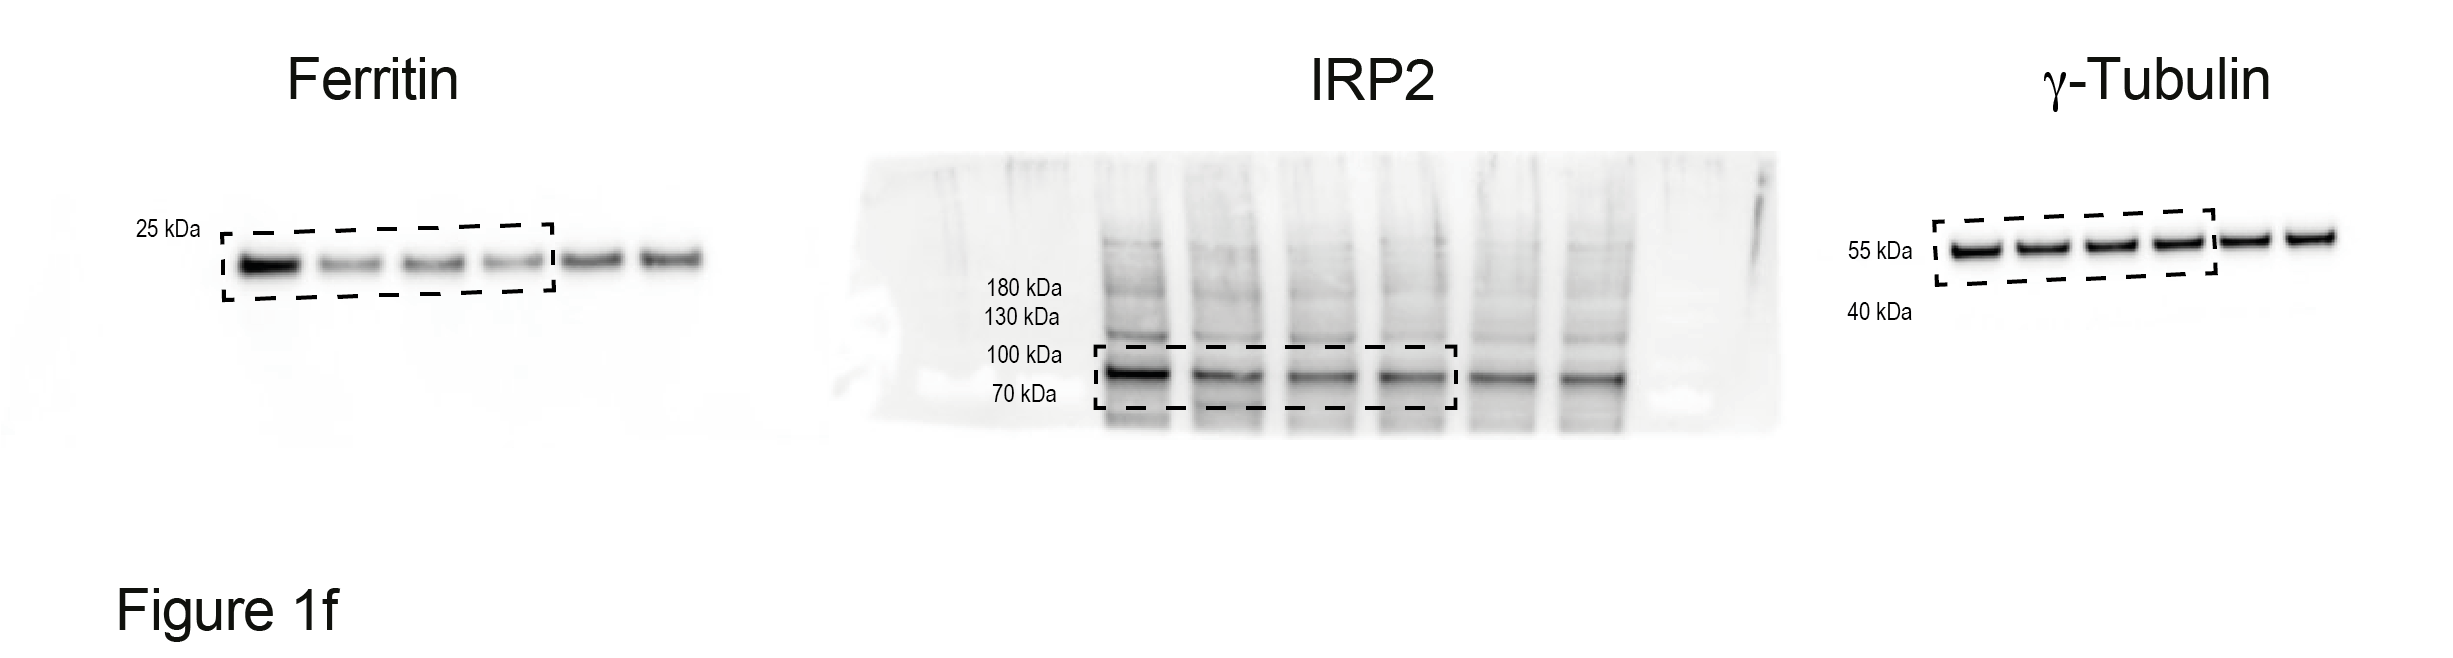
**

**
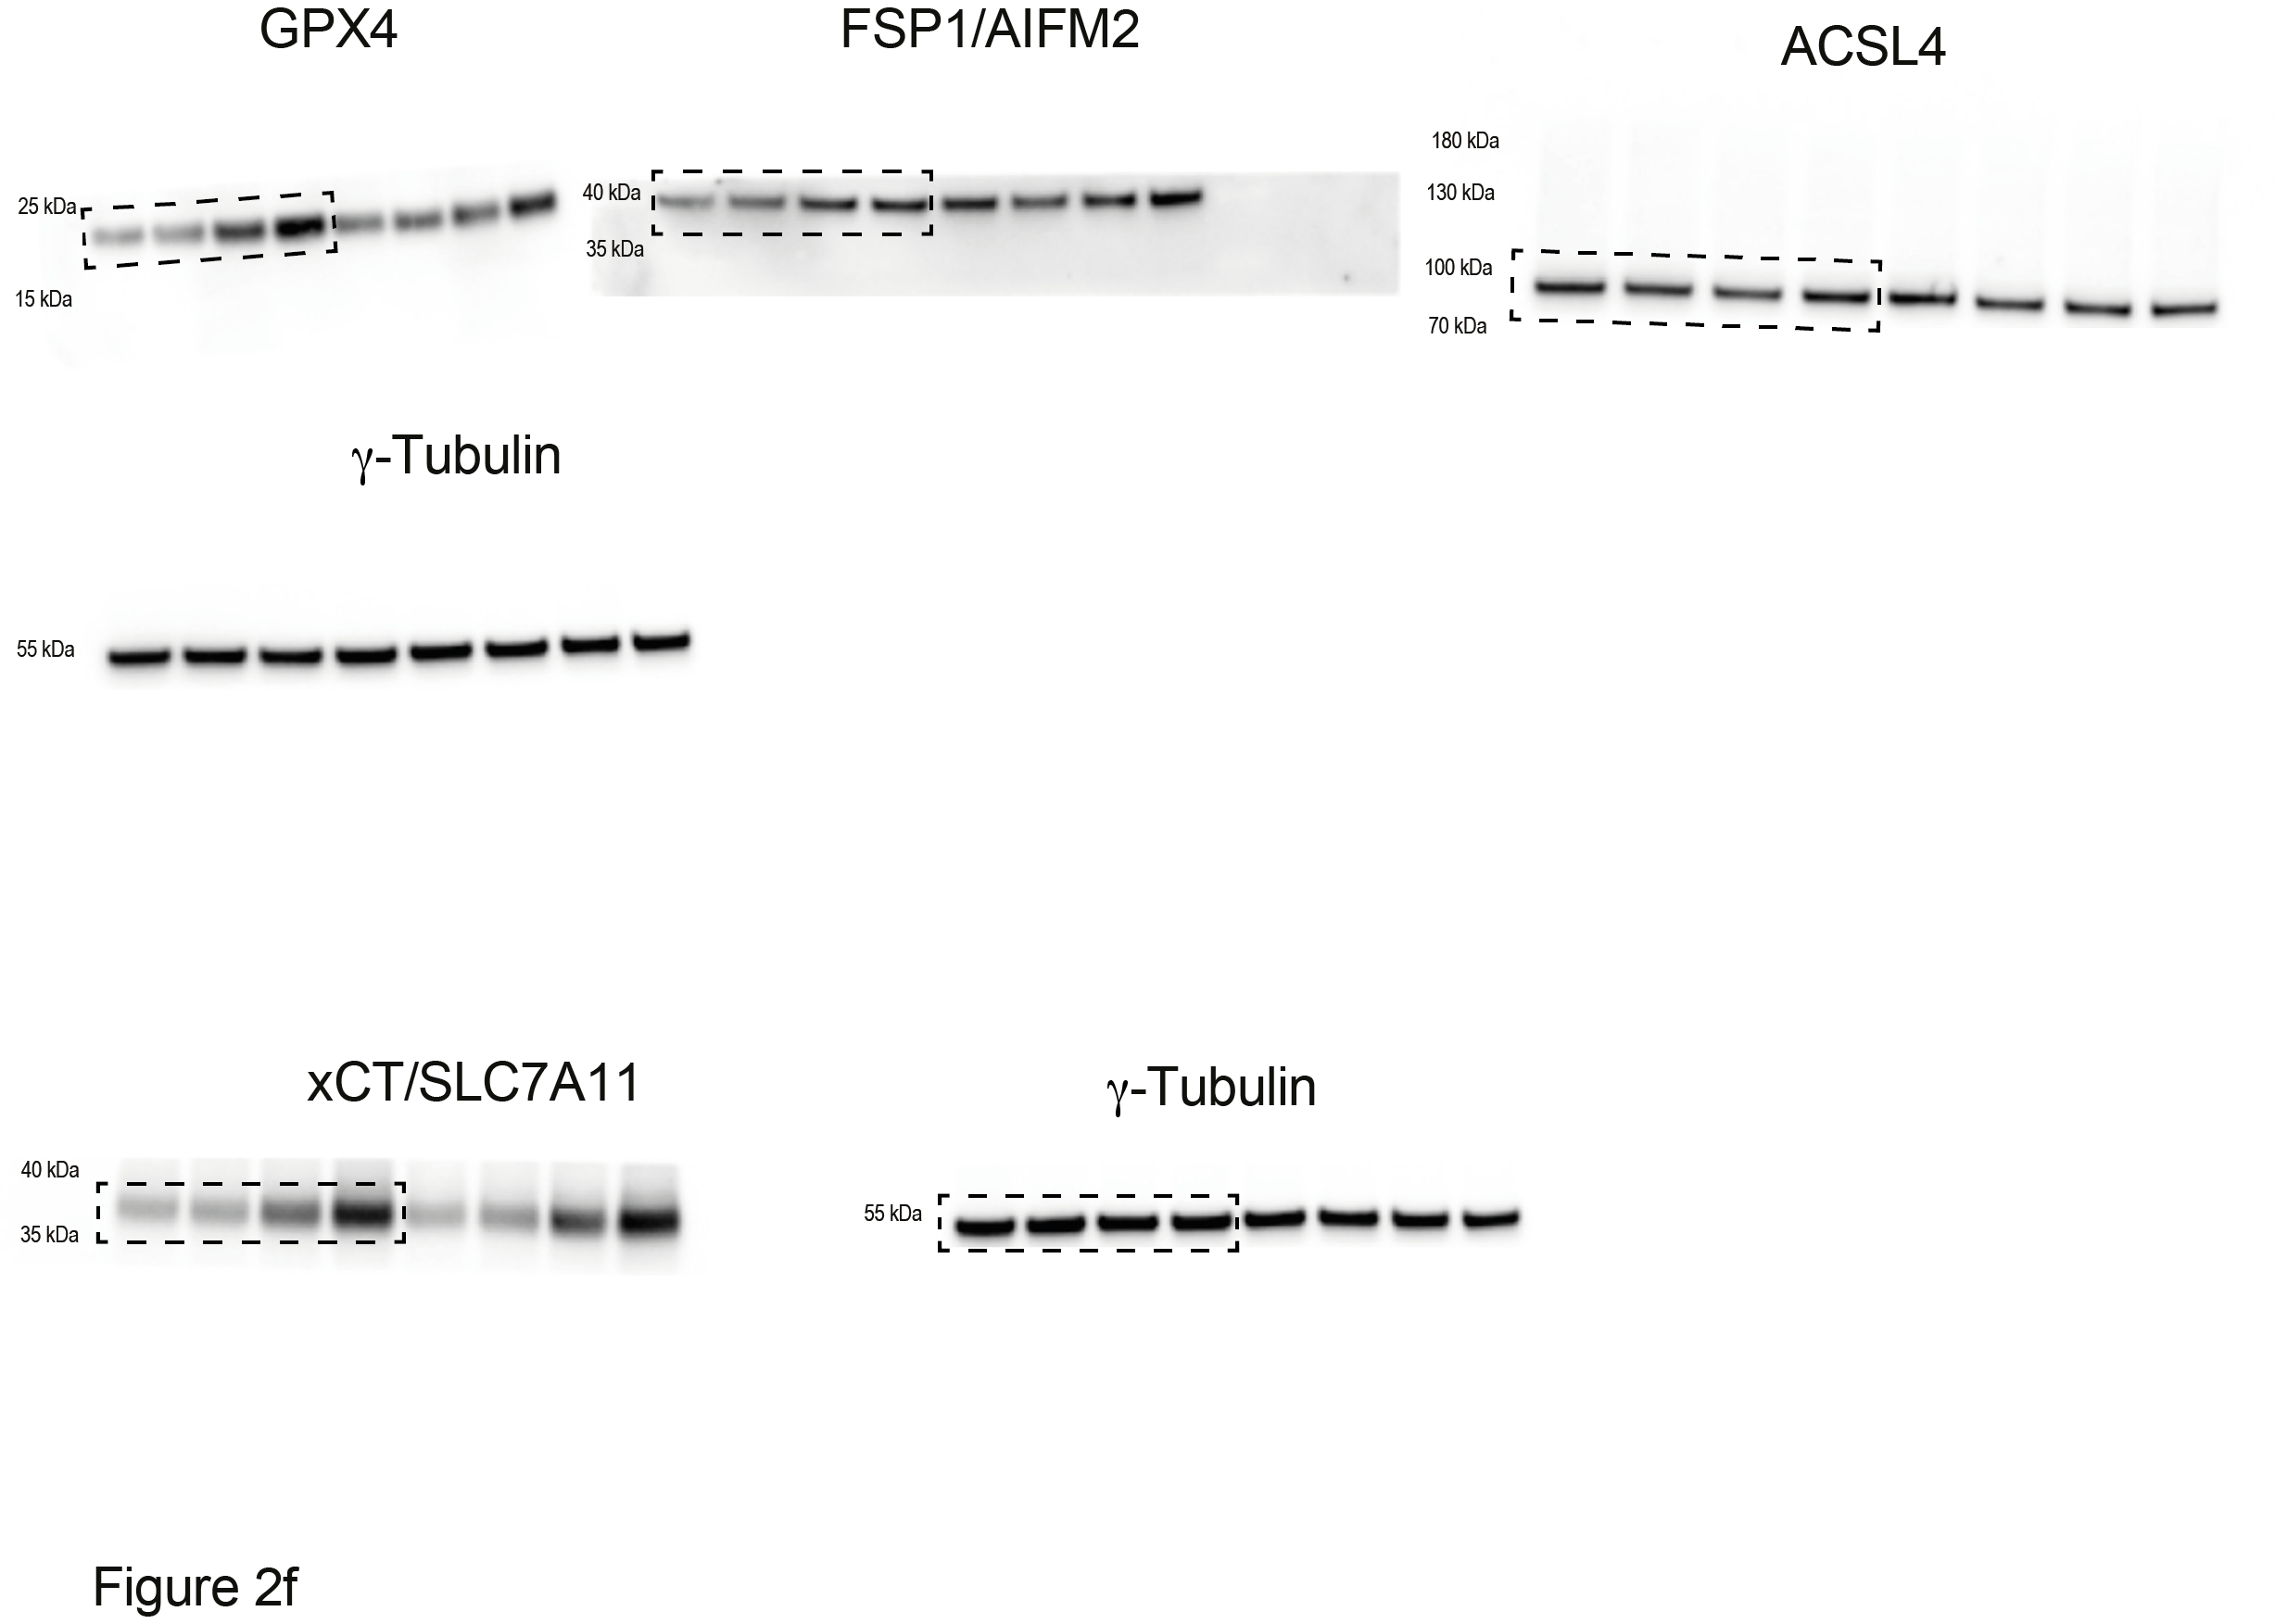
**

**
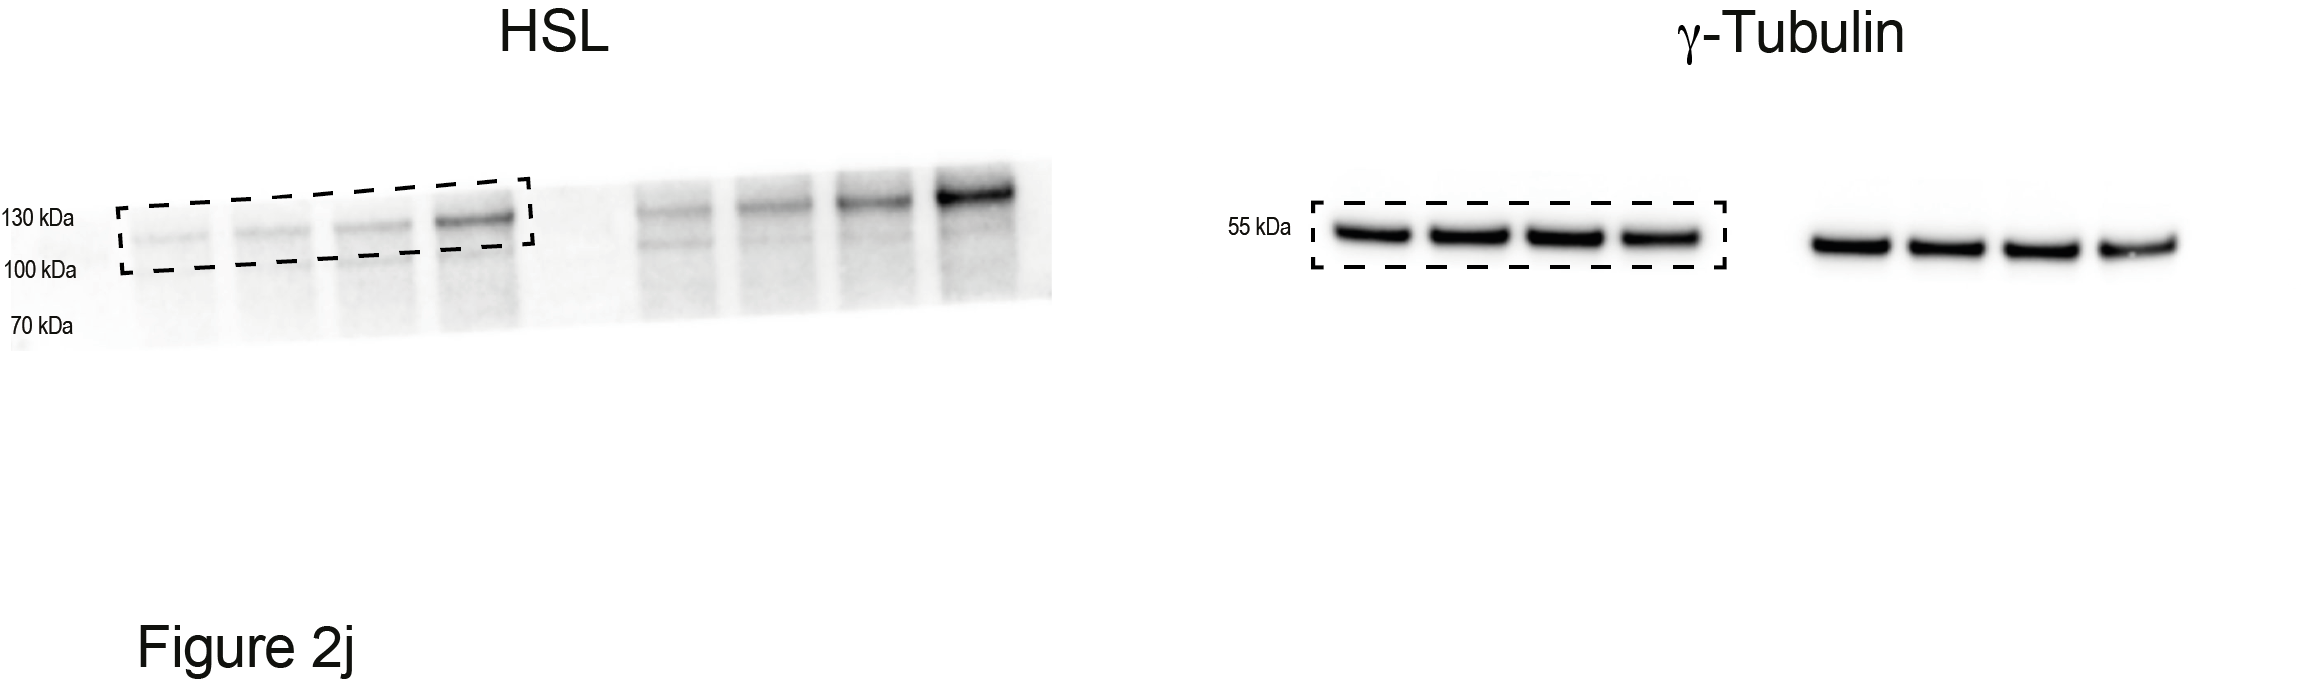
**

**Abbreviations**

**Al2O3**: Aluminum oxide

**aq.**: Aqueous

**Ar**: Argon

**AU**: Arbitrary units

**BINAP**: 2,2’-bis(diphenylphosphino)-1,1’-binaphthalene

**Boc2O**: Di-*tert*-butyl dicarbonate

**CAM**: Cerium ammonium molybdate

**Cs2CO3**: Cesium carbonate

**CuI**: Copper iodide

**DCM**: Dichloromethane

**DFO:** Deferoxamine

**DIPEA**: *N-N*-Diisopropylethylamine

**DMAP**: Dimethylaminopyridine

**DMF**: Dimethylformamide

**DMSO**: Dimethylsulfoxide

**DOPC**:1,2-dioleoyl-*sn*-glycero-3-phosphocholine

**ESI-MS**: Electrospray ionisation mass spectrometry

**EtOAc**: Ethyl acetate

**EtOH**: Ethanol

**FA**: Formic acid

**Fe(OTf)2**: Iron(II) trifluoromethanesulfonate

***n*-Hex**: *n*-Hexane

**HATU**: 1-[Bis(dimethylamino)methylene]-1*H*-1,2,3-triazolo[4,5-*b*]pyridinium 3-oxid hexafluorophosphate

**HBTU**: *N,N,N′,N′*-Tetramethyl-*O-*(1*H*-benzotriazol-1-yl)uronium hexafluorophosphate

**HPLC**: High performance liquid chromatography

**HRMS**: High resolution mass spectroscopy

**K2CO3**: Potassium carbonate

**LRMS**: Low resolution mass spectrometry

**MeCN**: Acetonitrile

**MeOH**: Methanol

**MgSO4**: Magnesium sulfate

**MOMCl**: Chloromethyl methyl ether

**MS**: Mass spectrometry

**NaHCO3**: Sodium bicarbonate

**Na2CO3**: Sodium carbonate

**NH4Cl**: Ammonium chloride

**NMR multiplicity**: s (singlet), bs (broad singlet), d (doublet), dd (doublet of doublets), ddd (doublet of doublet of doublets), dt (doublet of triplets), dq (doublet of quadruplets), td (triplets of doublets), q (quadruplet), t (triplet), quint (quintet), m (multiplet)

**NMR**: Nuclear magnetic resonance

**NaOH**: Sodium hydroxide

**PTSA**: *p*-Toluenesulfonic acid

**Pd(OAc)2**: Palladium(II) acetate

# Pd(PPh3)2Cl2: Bis(triphenylphosphine)palladium(II)

# dichloride

# POCl3: Phosphorous trichloride

# rpm: Revolution per minute

**rt**: Room temperature

**sat.**: Saturated

**SOCl2**: Thionyl chloride

**TBABr**: Tetrabutylammonium bromide

**TBAF**: Tetrabutylammonium fluoride

**TEA**: Triethylamine

**TFA**: Trifluoroacetic acid

**Tf2O**: Trifluoromethanesulfonic anhydride

**THF**: Tetrahydrofuran

**TLC**: Thin layer chromatography

**TMS**: Trimethylsilyl

**TMSCl**: Trimethylsilyl chloride

**UPLC**: Ultra-high performance liquid chromatography

**UV**: Ultraviolet

**Chemical synthesis**

**Synthesis of cLip-1 (11)**

**Scheme 1. Synthesis of cLip-1.** (a) **1**, Boc2O, NaHCO3, THF, rt, 1 h, 96%. (b) trimethylsilylacetylene, CuI, Pd(PPh3)2Cl2, TEA, DMF, 70 °C, 16 h, 85%. (c) TBAF (1 M in THF), THF, 0 °C to rt, 1 h, 94%. (d) TFA, DCM, 0 °C to rt, 1 h, 97%. (e) ethyl formate, 70 °C, 16 h, 97%. (f) POCl3, DIPEA, DCM, -40 °C, 4 h, 55%. (g) i) **8**, **9**, MeOH, 40 – 50 °C, 3 h, ii) TMSCl, MeCN, **7**, MeOH, 50 – 60 °C, 4 h, iii) rt, 16 h, 21%. (h) TFA, DCM, 0 °C to rt, 1 h, 75%.

***Tert*-butyl (3-bromobenzyl)carbamate (2)54**

To a solution of **1** (1.0 g, 5.4 mmol) in THF (5 mL) was added NaHCO3 (0.92 g, 10.8 mmol). Then, a solution of Boc2O (1.4 g, 6.5 mmol) in THF (2 mL) was added dropwise. After 1 h of stirring at room temperature the reaction mixture was filtered, the filter cake was washed with acetone and filtrates were concentrated to dryness under reduced pressure. The residue was purified by Combiflash on SiO2 using *n*-Hex:EtOAc (95:5 to 85:15) to afford **2** as a white solid (1.5 g, 96%). Data is in accordance with the literature54. 1H NMR (500 MHz, methylene chloride-*d2*) δ: 7.47 – 7.43 (m, 1H), 7.43 – 7.40 (m, 1H), 7.26 – 7.19 (m, 2H), 5.00 – 4.62 (bs, 1H), 4.38 – 4.20 (m, 2H), 1.50 – 1.26 (m, 9H) ppm.

***Tert*-butyl (3-((trimethylsilyl)ethynyl)benzyl)carbamate (3)55**

Over a flask under argon containing CuI (95.0 mg, 0.50 mmol) and Pd(PPh3)2Cl2 (351.0 mg, 0.50 mmol) was added a solution of **2** (1.4 g, 5.0 mmol) and trimethylsilylacetylene (6.9 mL, 50.0 mmol) in anhydrous DMF (25 mL). Then, TEA (6.9 mL, 50.0 mmol) was added and the reaction mixture was stirred at 70 °C overnight. After cooling to room temperature, the mixture was poured into ice cold water (100 mL). The aqueous layer was extracted with EtOAc (2× 100 mL). Combined organic layers were washed with brine (100 mL), dried over anhydrous MgSO4, filtered and concentrated to dryness under reduced pressure. The residue was purified by Combiflash on SiO2 using *n*-Hex:EtOAc (95:5 to 90:10) to afford **3** as a brown liquid (1.3 g, 85%). Data is in accordance with the literature55. 1H NMR (500 MHz, dimethylsulfoxide-*d6*) δ: 7.48 – 7.38 (m, 1H), 7.38 – 7.28 (m, 3H), 7.28 – 7.22 (m, 1H), 4.14 – 4.02 (m, 2H), 1.47 – 1.23 (m, 9H), 0.23 (bs, 9H) ppm.

***tert*-butyl (3-ethynylbenzyl)carbamate (4)56**

To a solution of **3** (1.3 g, 4.2 mmol) in THF (20 mL) was added TBAF (11.4 mL, 11.4 mmol, 1 M in THF) dropwise at 0 °C. The mixture was stirred at room temperature for 1 h. Then, the mixture was diluted with EtOAc (50 mL), washed with a sat. aq. solution of NH4Cl (50 mL), brine (50 mL), dried over anhydrous MgSO4,filtered and concentrated to dryness under reduced pressure. The residue was purified by Combiflash on SiO2 using *n*-Hex:EtOAc (90:10) to afford **4** as a brown solid (906 mg, 94%). Data is in accordance with the literature56. 1H NMR (500 MHz, dimethylsulfoxide-*d6*) δ: 7.51 – 7.38 (m, 1H), 7.38 – 7.30 (m, 3H), 7.30 – 7.22 (m, 1H), 4.17 (s, 1H), 4.14 – 4.00 (m, 2H), 1.50 – 1.25 (m, 9H) ppm.

**(3-ethynylphenyl)methanamine (5)57**

To a solution of **4** (0.90 g, 3.9 mmol) in DCM (40 mL) was added TFA (4.8 mL, 62.6 mmol) at 0 °C. The mixture was stirred at room temperature for 1 h. Then, the mixture was concentrated to dryness under reduced pressure, dissolved in water (20 mL) and NaOH (2 N) was added to reach pH 14. The aqueous layer was extracted with EtOAc (2× 50 mL). Combined organic layers were washed with brine (50 mL), dried over anhydrous MgSO4, filtered and concentrated to dryness under reduced pressure. The residue was purified by Combiflash on SiO2 using DCM:MeOH:TEA (99:0:1 to 90:9:1) to afford **5** as a yellow liquid (496 mg, 97%). Data is in accordance with the literature57. 1H NMR (500 MHz, dimethylsulfoxide-*d6*) δ: 7.50 – 7.45 (m, 1H), 7.40 – 7.36 (m, 1H), 7.36 – 7.30 (m, 2H), 4.16 (s, 1H), 3.75 (s, 2H) ppm.

***N*-(3-ethynylbenzyl)formamide (6)**

A solution of **5** (0.48 g, 3.7 mmol) in ethyl formate (11 mL) was stirred at 70 °C overnight. Then, the mixture was concentrated to dryness under reduced pressure and purified by Combiflash on SiO2 using DCM:MeOH (100:0 to 95:5) to afford **6** as a white solid (570 mg, 97%). 1H NMR (400 MHz, dimethylsulfoxide-*d6*) δ: 8.52 (bs, 1H), 8.14 (d, *J* = 1.8 Hz, 1H), 7.41 – 7.26 (m, 4H), 4.35 – 4.26 (m, 2H), 4.18 (s, 1H) ppm. 13C NMR (101 MHz, dimethylsulfoxide-*d6*) δ: 161.2, 139.7, 130.4, 130.2, 128.7, 127.9, 121.7, 83.4, 80.7, 40.3 ppm. HRMS(ESI-MS) m/z calculated for C10H10NO [M+H]+ 160.0757, found 160.0758.

**1-ethynyl-3-(isocyanomethyl)benzene (7)**

To a solution of **6** (0.48 g, 3.0 mmol) in anhydrous DCM (10 mL) was added DIPEA (1.9 mL, 11.3 mmol) under argon. Then, the mixture was cooled to -40 °C and POCl3 (341.0 µL, 3.6 mmol) was added dropwise. The mixture was stirred at -40 °C for 4 h. After this time, the mixture was diluted with DCM (10 mL), washed with a sat. aq. solution of Na2CO3 (10 mL), brine (10 mL) and an aq. solution of HCl (1 N, 2× 10 mL). The organic layer was dried over anhydrous MgSO4, filtered and concentrated to dryness under reduced pressure. The residue was purified by Combiflash on SiO2 using *n*-Hex:EtOAc (90:10) to afford **7** as a white solid (326 mg, 77%). 1H NMR (500 MHz, dimethylsulfoxide-*d6*) δ: 7.50 – 7.39 (m, 4H), 4.90 – 4.85 (m, 2H), 4.26 (s, 1H) ppm. 13C NMR (126 MHz, dimethylsulfoxide-*d6*) δ: 156.9 (t, *J*13C-14N = 5 Hz), 134.0, 131.3, 130.0, 129.3, 127.5, 122.2, 82.9, 81.4, 44.4 (t, *J*13C-14N = 6.4 Hz) ppm.

***tert*-butyl 3'-((3-ethynylbenzyl)amino)-1'*H*-spiro[piperidine-4,2'-quinoxaline]-1-carboxylate (10)**

A solution of **8** (77.0 mg, 0.71 mmol) and **9** (141.0 mg, 0.71 mmol) in anhydrous MeOH (0.7 mL) was stirred at 50 °C for 3 h under argon. Then, to the white suspension mixture was added successively a solution of TMSCl (90.0 µL, 0.71 mmol) in anhydrous MeCN (0.7 mL) and a solution of **7** (100.0 mg, 0.71 mmol) in anhydrous MeOH (0.7 mL). The limpid yellow mixture was stirred at 55 °C for 4 h and then at room temperature overnight. After this time an aq. solution of HCl (10 mL, 0.1 N) was added to the mixture and the aqueous layer was extracted with EtOAc (2× 10 mL). The combined organic layers were washed with brine (10 mL), dried over anhydrous MgSO4, filtered and concentrated to dryness under reduced pressure. The residue was purified by preparative HPLC using H2O:MeCN:FA (70:30:0.1 to 30:70:0.1) to afford **10** as a white solid (65 mg, 21%). 1H NMR (500 MHz, methanol-*d4*) δ: 7.45 (s, 1H), 7.39 – 7.25 (m, 3H), 6.95 (dd, *J* = 7.7, 1.2 Hz, 1H), 6.87 – 6.76 (m, 2H), 6.70 (ddd, *J* = 7.7, 7.1, 1.7 Hz, 1H), 4.55 (s, 2H), 3.96 (m, 2H), 3.44 (s, 1H), 3.29 – 3.05 (m, 2H), 1.92 – 1.79 (m, 2H), 1.75 – 1.68 (m, 2H), 1.45 (s, 9H) ppm. 13C NMR (126 MHz, methanol-*d4*) δ: 160.5, 156.5, 141.3, 135.9, 135.6, 132.0, 131.5, 129.5, 129.0, 124.2, 123.7, 123.5, 120.5, 115.7, 84.5, 81.3, 78.4, 52.6, 44.8, 39.9, 38.9, 31.8 (2C), 28.7 (3C) ppm. HRMS(ESI-MS) m/z calculated for C26H31N4O2 [M+H]+ 431.2442, found 431.2444.

**cLip-1 (11)**

To a solution of **10** (50.0 mg, 0.12 mmol) in DCM (1 mL) was added dropwise TFA (133.0 µL, 1,74 mmol) at 0 °C. After stirring at room temperature for 1 h, the mixture was concentrated to dryness under reduced pressure and the product was purified by preparative HPLC using H2O:MeCN:FA(95:5:0.1 to 70:30:0.1) to afford cLip-1 as white formate salt. The salt was dissolved in water (2 mL) and NaOH (1 N) was added until reach pH 14. The aqueous layer was extracted with DCM (10 mL). Combined organic layers were washed with brine (10 mL), dried over MgSO4, filtered and concentrated to dryness under reduced pressure to afford cLip-1 as a white solid (30 mg, 75%). 1H NMR (500 MHz, methanol-*d4*) δ: 7.47 (s, 1H), 7.41 – 7.36 (m, 1H), 7.35 – 7.26 (m, 2H), 6.96 (d, *J* = 7.8 Hz, 1H), 6.88 – 6.77 (m, 2H), 6.70 (dt, *J* = 7.5, 1.3 Hz, 1H), 4.57 (s, 2H), 3.44 (s, 1H), 3.04 (dt, *J* = 12.8, 2.7 Hz, 2H), 2.96 – 2.89 (m, 2H), 1.87 (dt, *J* = 13.0, 4.6 Hz, 2H), 1.74 (dt, *J* = 13.8, 2.5 Hz, 2H) ppm. 13C NMR (126 MHz, methanol-*d4*) δ: 160.4, 141.4, 135.6, 135.5, 132.0, 131.5, 129.5, 129.1, 124.1, 123.8, 123.0, 120.6, 115.8, 84.5, 78.5, 52.4, 45.4, 41.1 (2C), 31.8 (2C) ppm. HRMS(ESI-MS) m/z calculated for C21H23N4 [M+H]+ 331.1917, found 331.1917.

**Synthesis of metcLip-1 (13)**

**Scheme 2. Synthesis of metcLip-1.** (a)i) **12**, **9**, MeOH, 40 – 50 °C, 3 h, ii) TMSCl, MeCN, **7**, MeOH, 50 – 60 °C, 4 h, iii) rt, 16 h, (b) TFA, DCM, 0 °C to rt, 1 h (12% over 2 steps).

A solution of **12** (77.0 µL, 0.71 mmol) and **9** (141.0 mg, 0.71 mmol) in anhydrous MeOH (0.7 mL) was stirred at 50 °C for 3 h under argon. Then, over the dark pink solution was added successively a solution of TMSCl (90.0 µL, 0.71 mmol) in anhydrous MeCN (0.7 mL) and a solution of **7** (100.0 mg, 0.71 mmol) in anhydrous MeOH (0.7 mL). The dark pink mixture was stirred at 55 °C for 4 h and finally at room temperature overnight. After this time, water (10 mL) was added and the aqueous layer was extracted with DCM (20 mL). Combined organic layers were washed with brine (10 mL), dried over anhydrous MgSO4, filtered and concentrated to dryness under reduced pressure. The residue was dissolved in DCM (1 mL) and TFA (810.0 µL, 10.6 mmol) was added dropwise to the mixture. After stirring for 1 h at room temperature, the mixture was concentrated to dryness under reduced pressure and the crude was purified by preparative HPLC using H2O:MeCN:FA (90:10:0.1 to 50:50:0.1) to afford metcLip-1 as a white formate salt (32 mg, 12%) (visible traces of TFA). 1H NMR (500 MHz, methanol-*d4*) δ: 8.16 (s, 1H, formate), 7.50 (s, 1H), 7.42 – 7.29 (m, 3H), 7.21 (dd, *J* = 7.9, 1.0 Hz, 1H), 7.16 (m, 1H), 7.13 – 7.08 (m, 1H), 7.05 (td, *J* = 7.5, 1.0 Hz, 1H), 4.78 (s, 2H), 3.52 (s, 3H), 3.49 (s, 1H), 3.38 – 3.32 (m, 2H), 3.31 – 3.26 (m, 2H), 2.70 (s, 3H), 2.16 – 2.07 (m, 2H), 2.02 – 1.95 (m, 2H) ppm. 13C NMR (126 MHz, methanol-*d4*) δ: 165.6 (formate), 154.7, 141.8, 136.7, 135.7, 132.1, 131.8, 129.8, 129.1, 125.6, 125.0, 124.0, 123.7, 121,7, 114.0, 84.3, 78.8, 56.6, 54.5, 41.6, 38.9, 38.3, 28.7 (2C) ppm. HRMS(ESI-MS) m/z calculated for C23H27N4 [M+H]+ 359.2230, found 359.2226.

**Synthesis of alcLip-1 (15)**

**Scheme 3. Synthesis of alcLip-1.** (a)i) **14**, **9**, MeOH, 40 – 50 °C, 3 h, ii) TMSCl, MeCN, **7**, MeOH, 50 – 60 °C, 4 h, iii) rt, 16 h (b) TFA, DCM, 0 °C to rt, 1 h (20% over 2 steps).

A solution of **14** (81.0 mg, 0.71 mmol) and **9** (141.0 mg, 0.71 mmol) in anhydrous MeOH (0.7 mL) was stirred at 50 °C for 3 h under argon. Then, over the white suspension was added successively a solution of TMSCl (90.0 µL, 0.71 mmol) in anhydrous MeCN (0.7 mL) and a solution of **7** (100 mg, 0.71 mmol) in anhydrous MeOH (0.7 mL). The mixture was stirred at 55 °C for 4 h and then at room temperature overnight. After this time, water (10 mL) was added and the aqueous layer was extracted with DCM (20 mL). The organic layer was washed with brine (10 mL), dried over anhydrous MgSO4, filtered and concentrated to dryness under reduced pressure. The residue was dissolved in DCM (1 mL) and TFA (810.0 µL, 10.6 mmol) was added dropwise to the mixture. After stirring for 1 h at room temperature the solvent was removed under reduced pressure and the crude was purified by preparative HPLC using H2O:MeCN:FA (95:5:0.1 to 70:30:0.1) to afford alcLip-1 as white formate salt (65 mg, 20%). 1H NMR (500 MHz, methanol-*d4*) δ: 8.49 (s, 2H), 7.48 – 7.42 (m, 2H), 7.40 (t, *J* = 7.6 Hz, 1H), 7.36 – 7.30 (m, 1H), 4.67 – 4.55 (m, 2H), 3.57 (s, 1H), 3.51 (td, *J* = 12.3, 3.8 Hz, 1H), 3.40 – 3.32 (m, 2H), 3.27 – 3.20 (m, 1H), 3.09 (ddd, *J* = 11.8, 9.4, 3.8 Hz, 1H), 2.70 (td, *J* = 13.6, 5.2 Hz, 1H), 2.50 (ddd, *J* = 11.4, 9.5, 3.7 Hz, 1H), 2.35 – 2.21 (m, 2H), 2.16 – 2.09 (m, 1H), 2.08 – 2.01 (m, 1H), 1.96 – 1.89 (m, 1H), 1.86 – 1.78 (m, 2H), 1.46 – 1.29 (m, 3H), 1.29 – 1.14 (m, 1 H) ppm. 13C NMR (126 MHz, methanol-*d4*) δ: 170.1(formate), 168.3, 136.5, 132.8, 131.9, 130.2, 128.8, 124.5, 83.8, 79.6, 59.5, 55.8, 53.2, 45.7, 40.1, 40.0, 32.6, 31.9, 31.4, 30.7, 26.0, 25.2 ppm. HRMS (ESI-MS) m/z calculated for C21H29N4 [M+H]+ 337.2387, found 337.2386.

**Synthesis of fentomycin**

**Scheme 4. Synthesis of fentomycin.** (a) **17**, **19**, toluene, 100 °C, 16 h, then concentrated to dryness; MeOH, rt, 4 h, then K2CO3, rt, 1 h, 33%. (b) Tf2O, TEA, DCM, -78 °C to rt, 6 h, 78%. (c) **21**, **27**, CuI, K2CO3, toluene, 160 °C, sealed tube, 72 h, 33%. (d) BF3·Et2O, DCM, -78 °C to rt, 6 h, 62%. (e) Benzaldehyde dimethylacetal, PTSA, DMF, 40 °C (30 mbar), 16 h, 98%. (f) (*i*Pr)2EtN, MOMCl, DCM, rt, 72 h, 91%. (g) *sec*-Butyllithium (1.6 M in hexane), THF, -40 °C, 1.5 h, 61%. (h) *O*-benzylhydroxylamine HCl salt, NaOAc, EtOH, rt, 2 h, 90%. (i) Anhydrous CeCl3, methyllithium (3 M in diethoxymethane), THF, -78 °C, 1 h; then **26**, -78 °C to 0 °C, 2 h, 76%. (j) H2, Pd/C, MeOH, rt, 16 h, 88%. (k) 48% wt/wt aq. HBF4, MeCN, 82 °C, 2 h, 13%. (l) succinic acid, DMAP, anhydrous pyridine, 90 ºC, 40 h, 36%. (m) dimethylamine HCl salt, NaOH, H2O, sealed tube, 155 ºC, 16 h, 91%. (n) SOCl2, DCM, rt, 16 h, 93%. (o) Na2CO3, TBABr, anhydrous MeCN, 90 °C, 16 h, 27%. (p) Pd(OAc)2, BINAP, Cs2CO3, dioxane, reflux, overnight, 66%. (q) SOCl2,DCM, 0 ºC to rt, 16 h, 56%. (r) Na2CO3, TBABr, MeCN, reflux under Ar, 16 h, 66%. (s) TFA, DCM, 0 ºC then rt, 2 h, 69%. (t) HBTU, DIPEA, THF, rt, 4 h, 86%.

**2-((2*S*,2'*S*)-[2,2'-bipyrrolidin]-1-ylmethyl)-*N*,*N*-dimethylpyridin-4-amine (33a)58 and 2,2'-((2*S*,2'*S*)-[2,2'-bipyrrolidine]-1,1'-diylbis(methylene))bis(*N*,*N*-dimethylpyridin-4-amine) (33b)59**

Into a 100 mL Schlenk flask were mixed 2-chloromethyl-4-dimethylaminopyridine (**31**)60 (0.79 g, 4.63 mmol) and (*S,S*)-2,2-bipyrrolidine (**32**) (0.65 g, 4.63 mmol) in anhydrous MeCN (45 mL). Then Na2CO3 (1.96 g, 18.54 mmol) and TBABr (0.29 g, 0.93 mmol) were added directly as solids and the resulting mixture was heated at reflux under argon for 16 h. After cooling to room temperature, the resulting brown mixture was filtered and the filter cake was washed with DCM. The combined filtrates were concentrated to dryness under reduced pressure. Over the resulting residue was added an aq. solution of NaOH (1 N, 10 mL) and the mixture was extracted with DCM (3× 10 mL). The combined organic layers were dried over anhydrous MgSO4, filtered and concentrated to dryness under reduced pressure. The residue was purified by Combiflash on Al2O3 neutral using DCM:MeOH (100:0 to 95:5) to afford **33a** as a brown oil (0.38 g, 27%). Data is in accordance with the literature58. 1H NMR (500 MHz, methanol-*d4*) δ: 8.06 (d, *J* = 7.0 Hz, 1H), 6.62 (d, *J* = 5.1 Hz, 2H), 3.98 (dd, *J* = 15.2, 2.4 Hz, 1H), 3.77 (d, *J* = 15.2 Hz, 1H), 3.41 (q, *J* = 8.2 Hz, 1H), 3.26 – 3.24 (m, 1H), 3.09 – 2.96 (m, 9H), 2.63 (dt, *J* = 11.0, 7.0 Hz, 1H), 2.15 – 2.04 (m, 2H), 2.04 – 1.88 (m, 3H), 1.88 – 1.74 (m, 1H), 1.72 – 1.51 (m, 2H) ppm.

Product **33b** was obtained as a side product of the reaction and as brown solid (0.13 g, 10%). Data is in accordance with the literature59. 1H NMR (400 MHz, methanol-*d4*) δ: 7.95 (d, *J* = 6.1 Hz, 2H), 6.72 (d, *J* = 2.6 Hz, 2H), 6.48 (dd, *J* = 6.1, 2.7 Hz, 2H), 4.16 (d, *J* = 14.2 Hz, 2H), 3.42 (d, *J* = 14.2 Hz, 2H), 3.06 – 2.98 (m, 2H), 2.95 (s, 12H), 2.82 – 2.72 (m, 2H), 2.34 – 2.22 (m, 2H), 1.92 – 1.87 (m, 2H), 1.80 – 1.65 (m, 6H) ppm.

***tert*-butyl (4-((2-(hydroxymethyl)pyridin-4-yl)amino)butyl)carbamate (35)**

In a dry Schlenk flask were added under argon (4-chloropyridin-2-yl)methanol (**30**) (1.0 g, 6.97 mmol), *tert*-butyl(4-aminobutyl)carbamate (**34**) (1.6 mL, 8.36 mmol), Pd(OAc)2 (0.08 g, 0.35 mmol), BINAP (0.22 g, 0.35 mmol) and Cs2CO3 (3.40 g, 10.45 mmol). Then was added anhydrous dioxane (70 mL) and the reaction was stirred at reflux overnight. After cooling to room temperature, the mixture was concentrated to dryness under reduced pressure and the residue was purified by Combiflash on SiO2 using DCM:MeOH:TEA (90:10:5) to afford **35** as a brown oil (1.35 g, 66%). 1H NMR (500 MHz, methanol-*d4*) δ: 7.90 (d, *J* = 5.8 Hz, 1H), 6.69 (s, 1H), 6.42 (d, *J* = 5.8 Hz, 1H), 4.52 (s, 2H), 3.17 (t, *J* = 6.8 Hz, 2H), 3.07 (t, *J* = 6.8 Hz, 2H), 1.63 – 1.60 (m, 2H), 1.59 – 1.54 (m, 2H), 1.43 (s, 9H) ppm. 13C NMR (126 MHz, methanol-*d4*) δ: 161.5, 158.6, 157.0, 148.7, 106.9, 104.5, 79.9, 65.3, 43.0, 41.0, 28.8 (3C), 28.5, 27.1 ppm. HRMS(ESI-MS) m/z calculated for C15H26N3O3 [M+H]+ 296.1969, found 296.1967.

***tert*-butyl (4-((2-(chloromethyl)pyridin-4-yl)amino)butyl)carbamate (36)**

To a Schlenk tube containing **35** (1.35 g, 4.58 mmol) was added anhydrous DCM (45 mL) and the solution was cooled at 0 ºC, then was added dropwise SOCl2 (0.50 mL, 6.86 mmol). The reaction was allowed to reach room temperature and was stirred overnight. After this time the reaction was carefully quenched with a sat. aq. solution of Na2CO3 and extracted with DCM (3× 20 mL). The combined organic layers were dried over MgSO4, filtered andconcentrated to dryness under reduced pressure and the residue was purified by Combiflash on SiO2 using DCM:MeOH (100:0 to 90:10) to afford **36** as a brown oil (0.80 g, 56%). 1H NMR (400 MHz, methanol-*d4*) δ: 7.94 (d, *J* = 5.9 Hz, 1H), 6.66 (d, *J* = 2.1 Hz, 1H), 6.46 (dd, *J* = 5.9, 2.3 Hz, 1H), 4.48 (s, 2H), 3.15 (t, *J* = 6.7 Hz, 2H), 3.07 (t, *J* = 6.6 Hz, 2H), 1.69 – 1.49 (m, 4H), 1.42 (s, 9H) ppm. 13C NMR (126 MHz, chloroform-*d*) δ: 156.9, 156.3, 154.5, 149.7 (2C), 106.8, 106.3, 50.9, 47.2, 42.5, 28.5 (3C), 27.9, 26.2 ppm. HRMS(ESI-MS) m/z calculated for C15H25ClN3O2 [M+H]+ 314.1630, found 314.1630.

***tert*-butyl (4-((2-(((2*S*,2'*S*)-1'-((4-(dimethylamino)pyridin-2-yl)methyl)-[2,2'-bipyrrolidin]-1-yl)methyl)pyridin-4-yl)amino)butyl)carbamate (37)**

In a 10 mL Schlenk flask were mixed **36** (0.11 g, 0.34 mmol) and **33a** (0.09 g, 0.34 mmol) in anhydrous MeCN (4 mL). Then were added Na2CO3 (0.14 g, 1.37 mmol) and TBABr (0.02 g, 0.07 mmol) directly as solids and the resulting mixture was heated at reflux under argon for 16 h. After cooling to room temperature, the resulting brown mixture was filtered and the filter cake was washed with DCM. The combined filtrates were concentrated to dryness under reduced pressure. To the resulting residue was added a sat. aq. solution of Na2CO3 (5 mL) and the mixture was extracted with DCM (3× 5 mL). The combined organic layers were dried over anhydrous MgSO4, filtered and concentrated to dryness under reduced pressure. The residue was purified by Combiflash on neutral Al2O3 using DCM:MeOH (100:0 to 95:5) to afford **37** as a brown oil (0.124 g, yield 66%). 1H NMR (400 MHz, chloroform-*d*) δ: 8.10 (d, *J* = 6.0 Hz, 1H), 8.05 (d, *J* = 5.7 Hz, 1H), 6.65 (d, *J* = 2.6 Hz, 1H), 6.55 (d, *J* = 2.4 Hz, 1H), 6.32 (dd, *J* = 5.9, 2.7 Hz, 1H), 6.24 (dd, *J* = 5.8, 2.4 Hz, 1H), 4.82 (bs, 1H), 4.29 (bs, 1H), 4.07 (dd, *J* = 17.6, 14.2 Hz, 2H), 3.37 (dd, *J* = 14.1, 12.4 Hz, 2H), 3.18 – 3.06 (m, 4H), 3.06 – 2.96 (m, 2H), 2.93 (s, 6H), 2.81 – 2.73 (m, 2H), 2.29 – 2.16 (m, 2H), 1.86 – 1.51 (m, 12H), 1.42 (s, 9H) ppm. 13C NMR (101 MHz, chloroform-*d*) δ: 160.4, 160.3, 156.2, 155.0, 154.1, 149.2, 148.9, 106.4, 105.7, 105.2, 105.1, 79.3, 65.7, 65.7, 61.7, 61.5, 55.4, 55.4, 42.4, 40.3, 39.2 (2C), 28.5 (3C), 27.9, 26.4, 26.4, 26.3, 23.8 (2C) ppm. HRMS(ESI-MS) m/z calculated for C31H50N7O2 [M+H]+ 552.4021, found 552.4025.

***N*1-(2-(((2*S*,2'*S*)-1'-((4-(dimethylamino)pyridin-2-yl)methyl)-[2,2'-bipyrrolidin]-1-yl)methyl)pyridin-4-yl)butane-1,4-diamine (38)**

Over a solution of **37** (0.084 g, 0.152 mmol) in anhydrous DCM (2 mL) at 0 ºC was added TFA (0.059 mL, 0.762 mmol). The reaction was allowed to reach room temperature and then was stirred for 2 h. After this time the mixture was concentrated to dryness under reduced pressure and the residue was redissolved in DCM, washed with an aq. solution of NaOH (1 N, 2 mL) and extracted with DCM (3× 2 mL). Combined organic layers were dried over anhydrous MgSO4, filtered and concentrated to dryness under reduced pressure. The residue was purified by Combiflash on Al2O3 using DCM:MeOH:TEA (90:10:5) to afford **38** as a brown oil (0.047 g, yield 69%). 1H NMR (500 MHz, methanol-*d4*) δ: 7.96 (d, *J* = 6.1 Hz, 1H), 7.86 (d, *J* = 5.9 Hz, 1H), 6.72 (d, *J* = 2.6 Hz, 1H), 6.65 (d, *J* = 2.4 Hz, 1H), 6.49 (dd, *J* = 6.2, 2.7 Hz, 1H), 6.37 (dd, *J* = 5.9, 2.4 Hz, 1H), 4.16 – 4.06 (m, 2H), 3.43 – 3.34 (m, 2H), 3.12 – 3.04 (m, 2H), 3.04 – 2.97 (m, 2H), 2.96 (s, 6H), 2.80 – 2.71 (m, 2H), 2.64 (t, *J* = 7.0 Hz, 2H), 2.32 – 2.19 (m, 2H), 1.93 – 1.83 (m, 2H), 1.77 – 1.65 (m, 6H), 1.65 – 1.56 (m, 2H), 1.56 – 1.48 (m, 2H) ppm. 13C NMR (126 MHz, methanol-*d4*) δ: 160.5, 160.4, 156.8, 156.6, 148.7 (2C), 106.9, 106.8, 106.6, 106.5, 67.8, 67.6, 62.3, 62.1, 56.4 (2C), 43.1, 42.3, 39.2 (2C), 31.3, 27.8 (2C), 27.3, 24.6, 24.6 ppm. HRMS(ESI-MS) m/z calculated for C26H42N7 [M+H]+ 452.3496, found 452.3498.

**Fentomycin (39)**

A solution of marmysunate (**29**)35,61 (3.2 mg, 0.0062 mmol), HBTU (11.8 mg, 0.0312 mmol) and DIPEA (32.4 µL, 0.1860 mmol) in anhydrous THF (100 µL) was stirred 1 h at room temperature before the addition of **38** (14.1 mg, 0.0312 mmol) in anhydrous THF (100 µL). The reaction was stirred 4 h at room temperature until TLC in Al2O3 (DCM:MeOH, 95:5) showed a total conversion, then the mixture was concentrated to dryness under reduced pressure and the residue was purified by preparative HPLC using H2O:MeCN:FA (95:5:0.1 to 0:100:0.1) to afford fentomycin as a red solid after freeze drying (formate salt, 5.0 mg, 86%). 1H NMR (500 MHz, methanol-*d4*) δ: 9.64 (s, 1H), 9.44 (d, *J* = 9.0 Hz, 1H), 8.54 (bs, 1H), 8.24 (d, *J* = 8.6 Hz, 1H), 8.09 (d, *J* = 8.6 Hz, 1H), 7.90 (dd, *J* = 6.3, 0.6 Hz, 1H), 7.82 (d, *J* = 6.5 Hz, 1H), 7.70 (d, *J* = 1.8 Hz, 1H), 7.53 (dd, *J* = 9.0, 1.8 Hz, 1H), 7.51 – 7.43 (m, 2H), 6.66 – 6.61(m, 2H), 6.59 – 6.52 (m, 2H), 4.84 (dd, *J* = 3.3, 1.9 Hz, 1H), 4.74 (d, *J* = 9.6 Hz, 1H), 4.12 (d, *J* = 15.1 Hz, 1H), 4.10 (d, *J* = 15.4 Hz, 1H), 3.65 (d, *J* = 15.1 Hz, 1H), 3.62 (d, *J* = 15.4 Hz, 1H), 3.33 (dq, *J* = 9.6, 6.1 Hz, 1H), 3.20 (t, *J* = 6.7 Hz, 2H,), 3.13 (t, *J* = 6.7 Hz, 2H), 3.08 – 2.98 (m, 8H), 2.93 – 2.83 (m, 2H), 2.82 – 2.65 (m, 2H), 2.58 (t, *J* = 6.5 Hz, 2H), 2.55 – 2.47 (m, 5H), 2.26 (ddd, *J* = 13.4, 3.3, 1.3 Hz, 1H), 2.00 – 1.69 (m, 7H), 1.68 – 1.51 (m, 6H), 1.38 (s, 3H), 1.04 (d, *J* = 6.1 Hz, 3H) ppm. 13C NMR (126 MHz, methanol-*d4*) δ: 187.3, 186.4, 174.0, 173.7, 170.0, 158.6, 157.9, 155.0 (2C), 149.9, 144.0, 143.5, 140.2, 137.9, 137.5, 137.0, 135.9, 135.7, 133.1, 129.6 (2C), 129.2, 128.9, 128.4, 123.3, 116.7, 111.8, 107.2 (2C), 106.6 (2C), 80.7, 70.4, 69.0, 68.9, 67.8, 59.8, 59.2, 55.9 (2C), 52.3, 43.2, 39.7 (3C), 35.8, 31.2, 30.5, 28.2 (2C), 28.0, 26.7, 25.3, 24.9, 24.8, 21.6, 18.5 ppm. 2D NMR COSY, HSQC, HMBC (spectra in methanol-*d4*provided). HRMS(ESI-MS) m/z calculated for C56H67N8O6 [M+H]+ 947.5184, found 947.5174.

**Synthesis of clickable White-Chen ligand (43, cWhite-Chen)**

**Scheme 5. Synthesis of cWhite-Chen.** (a) TBABr, K2CO3, MeCN, 90 ºC, 16 h, 38%. (b) NaOH 1N/MeOH, rt, overnight, 38%. (c) HATU, DIPEA, THF, rt, 16 h, 14%.

**Methyl 3-((2-(((2*S*,2'*S*)-1'-((4-(dimethylamino)pyridin-2-yl)methyl)-[2,2'-bipyrrolidin]-1-yl)methyl)pyridin-4-yl)(methyl)amino)propanoate (41)**

In a dry Schlenk flask were added **40**62 (0.30 g, 1.24 mmol), **33a** (0.34 g, 1.24 mmol) and anhydrous MeCN (12 mL). Then were added Na2CO3 (0.52 g, 4.99 mmol) and TBABr (0.08 g, 0.25 mmol). The resulting mixture was heated at reflux for 16 h under argon. After cooling to room temperature, the resulting brown mixture was filtered and the filter cake was washed with DCM. The combined filtrates were concentrated to dryness under reduced pressure. To the resulting residue was added a sat. aq. solution of Na2CO3 (5 mL) and the mixture was extracted with DCM (3× 5 mL). The combined organic layers were dried over anhydrous MgSO4, filtered and concentrated to dryness under reduced pressure. Subsequently, the residue was purified by Combiflash on neutral Al2O3 using DCM:MeOH (100:0 to 95:5) to afford **41** as a brown oil (0.23 g, 38%). 1H NMR (500 MHz, methanol-*d4*) δ: 7.97 (d, *J* = 6.2 Hz, 1H), 7.94 (d, *J* = 6.3 Hz, 1H), 6.76 (d, *J* = 2.7 Hz, 1H), 6.70 (d, *J* = 2.7 Hz, 1H), 6.56 – 6.49 (m, 2H), 4.22 – 4.12 (m, 2H), 3.67 (t, *J* = 7.0 Hz, 1H), 3.65 (s, 3H), 3.51 (d, *J* = 14.2 Hz, 2H), 3.10 – 2.99 (m, 3H), 2.96 (s, 6H), 2.94 (s, 3H), 2.88 – 2.78 (m, 2H), 2.56 (t, *J* = 7.0 Hz, 2H), 2.44 – 2.31 (m, 2H), 2.00 – 1.87 (m, 2H), 1.85 – 1.64 (m, 6H) ppm. 13C NMR (126 MHz, methanol-*d4*) δ: 173.7, 160.2, 159.6, 156.9, 155.7, 148.8, 148.3, 106.7 (2C), 106.6 (2C), 68.4, 68.3, 62.4, 62.3, 56.3 (2C), 52.3, 48.2, 39.2 (2C), 37.8, 32.4, 28.2 (2C), 24.8, 24.7 ppm. HRMS(ESI-MS) m/z calculated for C27H41N6O2 [M+H]+ 481.3286, found 481.3288.

**3-((2-(((2*S*,2'*S*)-1'-((4-(dimethylamino)pyridin-2-yl)methyl)-[2,2'-bipyrrolidin]-1-yl)methyl)pyridin-4-yl)(methyl)amino)propanoic acid (42)**

A solution of **41** (214 mg,0.446 mmol)in 5 mL of a mixture MeOH:NaOH 1 N (1:1) was stirred at room temperature overnight. Then the reaction was neutralised using an aq. solution of HCl (1 N) and concentrated to dryness under reduced pressure. The resultant residue was washed with MeOH and the salts were filtered off. The filtrate was concentrated to dryness under reduced pressure. The product was purified by preparative HPLC using H2O:MeCN:FA (95:5:0.1 to 0:100:0.1). The product was obtained as a white solid (80 mg, 38%). 1H NMR (500 MHz, methanol-*d4*) δ: 7.98 (d, *J* = 6.9 Hz, 1H), 7.96 (d, *J* = 6.9 Hz, 1H), 6.86 (d, *J* = 2.7 Hz, 1H), 6.82 – 6.78 (m, 2H), 6.76 (dd, *J* = 6.9, 2.8 Hz, 1H), 4.35 – 4.21 (m, 2H), 3.87 – 3.79 (m, 2H), 3.76 (td, *J* = 7.1, 1.6 Hz, 2H), 3.17 – 3.09 (m, 11H), 3.04 – 2.93 (m, 2H), 2.67 – 2.58 (m, 2H), 2.44 (t, *J* = 7.1 Hz, 2H), 2.08 – 1.98 (m, 2H), 1.95 – 1.79 (m, 4H), 1.74 – 1.65 (m, 2H) ppm. 13C NMR (126 MHz, methanol-*d4*) δ: 179.0, 158.3, 157.6, 154.6, 143.4, 143.3, 107.4, 107.2, 106.8, 106.6, 69.4, 69.3, 59.7, 59.5, 56.1, 56.0, 50.5, 39.9 (3C), 38.4, 36.0, 28.6, 28.5, 24.9, 24.8 ppm. HRMS(ESI-MS) m/z calculated for C26H39N6O2 [M+H]+ 467.3129, found 467.3242.

**Clickable White-Chen ligand (43, cWhite-Chen ligand)**

A solution of **42** (10 mg, 0.0214 mmol), HBTU (24.4 mg, 0.0644 mmol) and DIPEA (11.2 µL, 0.0644 mmol) in anhydrous THF (1mL) was stirred for 3 h at room temperature before the addition of propargylamine (4.1 µL, 0.0644 mmol). The reaction was stirred overnight at room temperature, then the mixture was concentrated to dryness under reduced pressure and the residue was purified by preparative HPLC using H2O:MeCN:FA (95:5:0.1 to 0:100:0.1) to afford cWhite-Chen ligand as a colorless oil (formate salt, 1.5 mg, 14%). 1H NMR (500 MHz, methanol-*d4*) δ: 8.47 (bs, 2H), 8.00 (dd, *J* = 13.4, 6.7 Hz, 2H), 6.84 (d, *J* = 2.8 Hz, 1H), 6.83 – 6.71 (m, 3H), 4.25 (dd, *J* = 15.3, 1.9 Hz, 2H), 3.92 (d, *J* = 2.5 Hz, 2H), 3.84 – 3.76 (m, 4H), 3.19 – 3.09 (m, 8H), 3.08 (s, 3H), 3.07 – 3.01 (m, 2H), 2.72 – 2.61 (m, 2H), 2.59 (t, *J* = 2.5 Hz, 1H), 2.50 (t, *J* = 6.7 Hz, 2H), 2.09 – 1.98 (m, 2H), 1.97 – 1.90 (m, 2H), 1.90 – 1.79 (m, 2H), 1.78 – 1.68 (m, 2H) ppm. 13C NMR (126 MHz, methanol-*d4*) δ: 172.7, 169.2 (formate), 158.3, 157.5, 154.9, 154.5, 144.4, 143.4, 107.6, 107.3, 107.2, 106.7, 80.4, 72.4, 69.0, 68.9, 59.8, 59.4, 55.9, 55.8, 49.0, 39.9 (2C), 38.3, 34.1, 29.5, 28.2, 28.1, 24.8 (2C) ppm.HRMS(ESI-MS) m/z calculated for C29H42N7O [M+H]+ 504.3445, found 504.3450.

**Synthesis of chemical probes**

**Lysosomal Fe3+ probe (RPE)63**

The lysosomal Fe3+ probe RPE was synthesised as previously reported and spectral data are in accordance with the literature63. 1H NMR (500 MHz, chloroform-*d*) δ: 8.72 (dd, *J* = 8.3, 1.0 Hz, 1H), 8.04 – 7.96 (m, 1H), 7.71 – 7.56 (m, 2H), 7.56 – 7.40 (m, 2H), 7.16 – 7.09 (m, 1H), 6.47 – 6.32 (m, 4H), 6.10 (dd, *J* = 8.7, 2.6 Hz, 2H), 3.90 (s, 3H), 3.40 – 3.17 (m, 8H), 1.12 (t, *J* = 7.1 Hz, 12H) ppm.

**Lysosomal Fe2+ probe (RhoNox-M)64**

This Fe2+-specific lysosomal probe was synthesised in 3 steps according to a previously published procedure and spectra data are in accordance with the literature64. 1H NMR (300 MHz, chloroform-*d*) δ: 7.93 (d, *J* = 2.0 Hz, 1H), 7.45 (dd, *J* = 8.5, 2.0 Hz, 1H), 7.40–7.30 (m, 3H), 7.05 (d, *J* = 8.5 Hz, 1H), 6.90 (d, *J* = 7.0 Hz, 1H), 6.80 (d, *J* = 8.0 Hz, 1H), 6.50–6.44 (m, 2H), 5.28–5.35 (m, 2H), 3.62 (m, 6H), 2.97 (s, 6H) ppm.

**Lysosomal GSH probe (SQSS)65**

The lysosomal GSH probe SQSS was synthesised as previously reported and spectral data are in accordance with the literature65. 1H NMR (500 MHz, dimethylsulfoxide-*d6*) δ: 8.72 (t, *J* = 5.8 Hz, 2H), 7.82 (d, *J* = 7.6 Hz, 2H), 7.57 (d, *J* = 8.2 Hz, 2H), 7.49 – 7.42 (m, 6H), 7.22 – 7.14 (m, 4H), 6.75 (t, *J* = 7.6 Hz, 2H), 5.84 (s, 2H), 5.82 (s, 2H), 4.31 (q, *J* = 7.1 Hz, 4H), 4.02 (q, *J* = 7.2 Hz, 4H), 3.95 (q, *J* = 6.2 Hz, 4H), 3.24 (t, *J* = 6.8 Hz, 4H), 1.28 (t, *J* = 7.1 Hz, 6H), 1.23 (t, *J* = 6.9 Hz, 6H) ppm.

**Lysosomal HO**• **Probe (1-Red)66**

The lysosomal HO• probe 1-Red was synthesised as previously reported and spectral data are in accordance with the literature66. 1H NMR (500 MHz, dimethylsulfoxide-*d6*) δ: 7.90 – 7.78 (m, 3H), 7.48 (d, *J* = 7.5 Hz, 1H), 7.34 (d, *J* = 2.5 Hz, 1H), 7.18 (dd, *J* = 8.9, 2.6 Hz, 1H), 7.13 – 7.05 (m, 2H), 6.74 (td, *J* = 7.4, 0.8 Hz, 1H), 6.69 (d, *J*= 7.8 Hz, 1H), 4.13 (s, 1H), 3.89 (s, 3H), 2.62 (s, 3H), 1.39 (s, 3H), 0.65 (s, 3H) ppm.

**Clickable deferoxamine (cDFO)7**

Propargyl bromide (8.50 μL, 0.076 mmol, 80% in toluene) was added to a suspension of DFO mesylate (50 mg, 0.076 mmol) and NaHCO3 (0.0192 mg, 0.2284 mmol) in anhydrous MeOH (1 mL) at 0 ºC and the reaction mixture was stirred overnight at room temperature. After filtration and concentration to dryness under reduced pressure, the crude residue was purified by preparative HPLC using H2O:MeCN:TFA (95:5:0.1 to 0:100:0.1) to afford cDFO as a white TFA salt (9.2 mg, 17%). Spectral data are in agreement with the literature7. 1H NMR (500 MHz, methanol-*d4*) δ: 3.94 (d, *J* = 2.5 Hz, 2H), 3.71 – 3.53 (m, 6H), 3.25 (t, *J* = 2.5 Hz, 1H), 3.17 (t, *J* = 7.0 Hz, 4H), 3.08 (t, *J* = 7.5 Hz, 2H), 2.76 (t, *J* = 7.0 Hz, 4H), 2.46 (dt, *J* = 10.0, 7.0 Hz, 4H), 2.09 (s, 3H), 1.74 – 1.61 (m, 8H), 1.53 (quint., *J* = 7.0 Hz, 4H), 1.46 – 1.27 (m, 6H) ppm.

**NMR spectra**

1H NMR spectrum of **6** in dimethylsulfoxide-*d6*

13C NMR spectrum of **6** in dimethylsulfoxide-*d6*

1H NMR spectrum of **7** in dimethylsulfoxide-*d6*

13C NMR spectrum of **7** in dimethylsulfoxide-*d6*

1H NMR spectrum of **10** in methanol-*d4*

13C NMR spectrum of **10** in methanol-*d4*

1H NMR spectrum of cLip-1, **11** in methanol-*d4*

13C NMR spectrum of cLip-1, **11** in methanol-*d4*

1H NMR spectrum of metcLip-1, **13** in methanol-*d4*

13C NMR spectrum of metcLip-1, **13** in methanol-*d4*

1H NMR spectrum of alcLip-1, **15** in methanol-*d4*

13C NMR spectrum of alcLip-1, **15** in methanol-*d4*

1H NMR spectrum of **35** in methanol-*d4*

13C NMR spectrum of **35** in methanol-*d4*

1H NMR spectrum of **36** in methanol-*d4*

13C NMR spectrum of **36** in chloroform-*d*

1H NMR spectrum of **37** in chloroform-*d*

13C NMR spectrum of **37** in chloroform-*d*

1H NMR spectrum of **38** in methanol-*d4*

13C NMR spectrum of **38** in methanol-*d4*

1H NMR spectrum of fentomycin, **39** in methanol-*d4*

13C NMR spectrum of fentomycin, **39** in methanol-*d4*

COSY NMR spectrum of fentomycin, **39** in methanol-*d4*
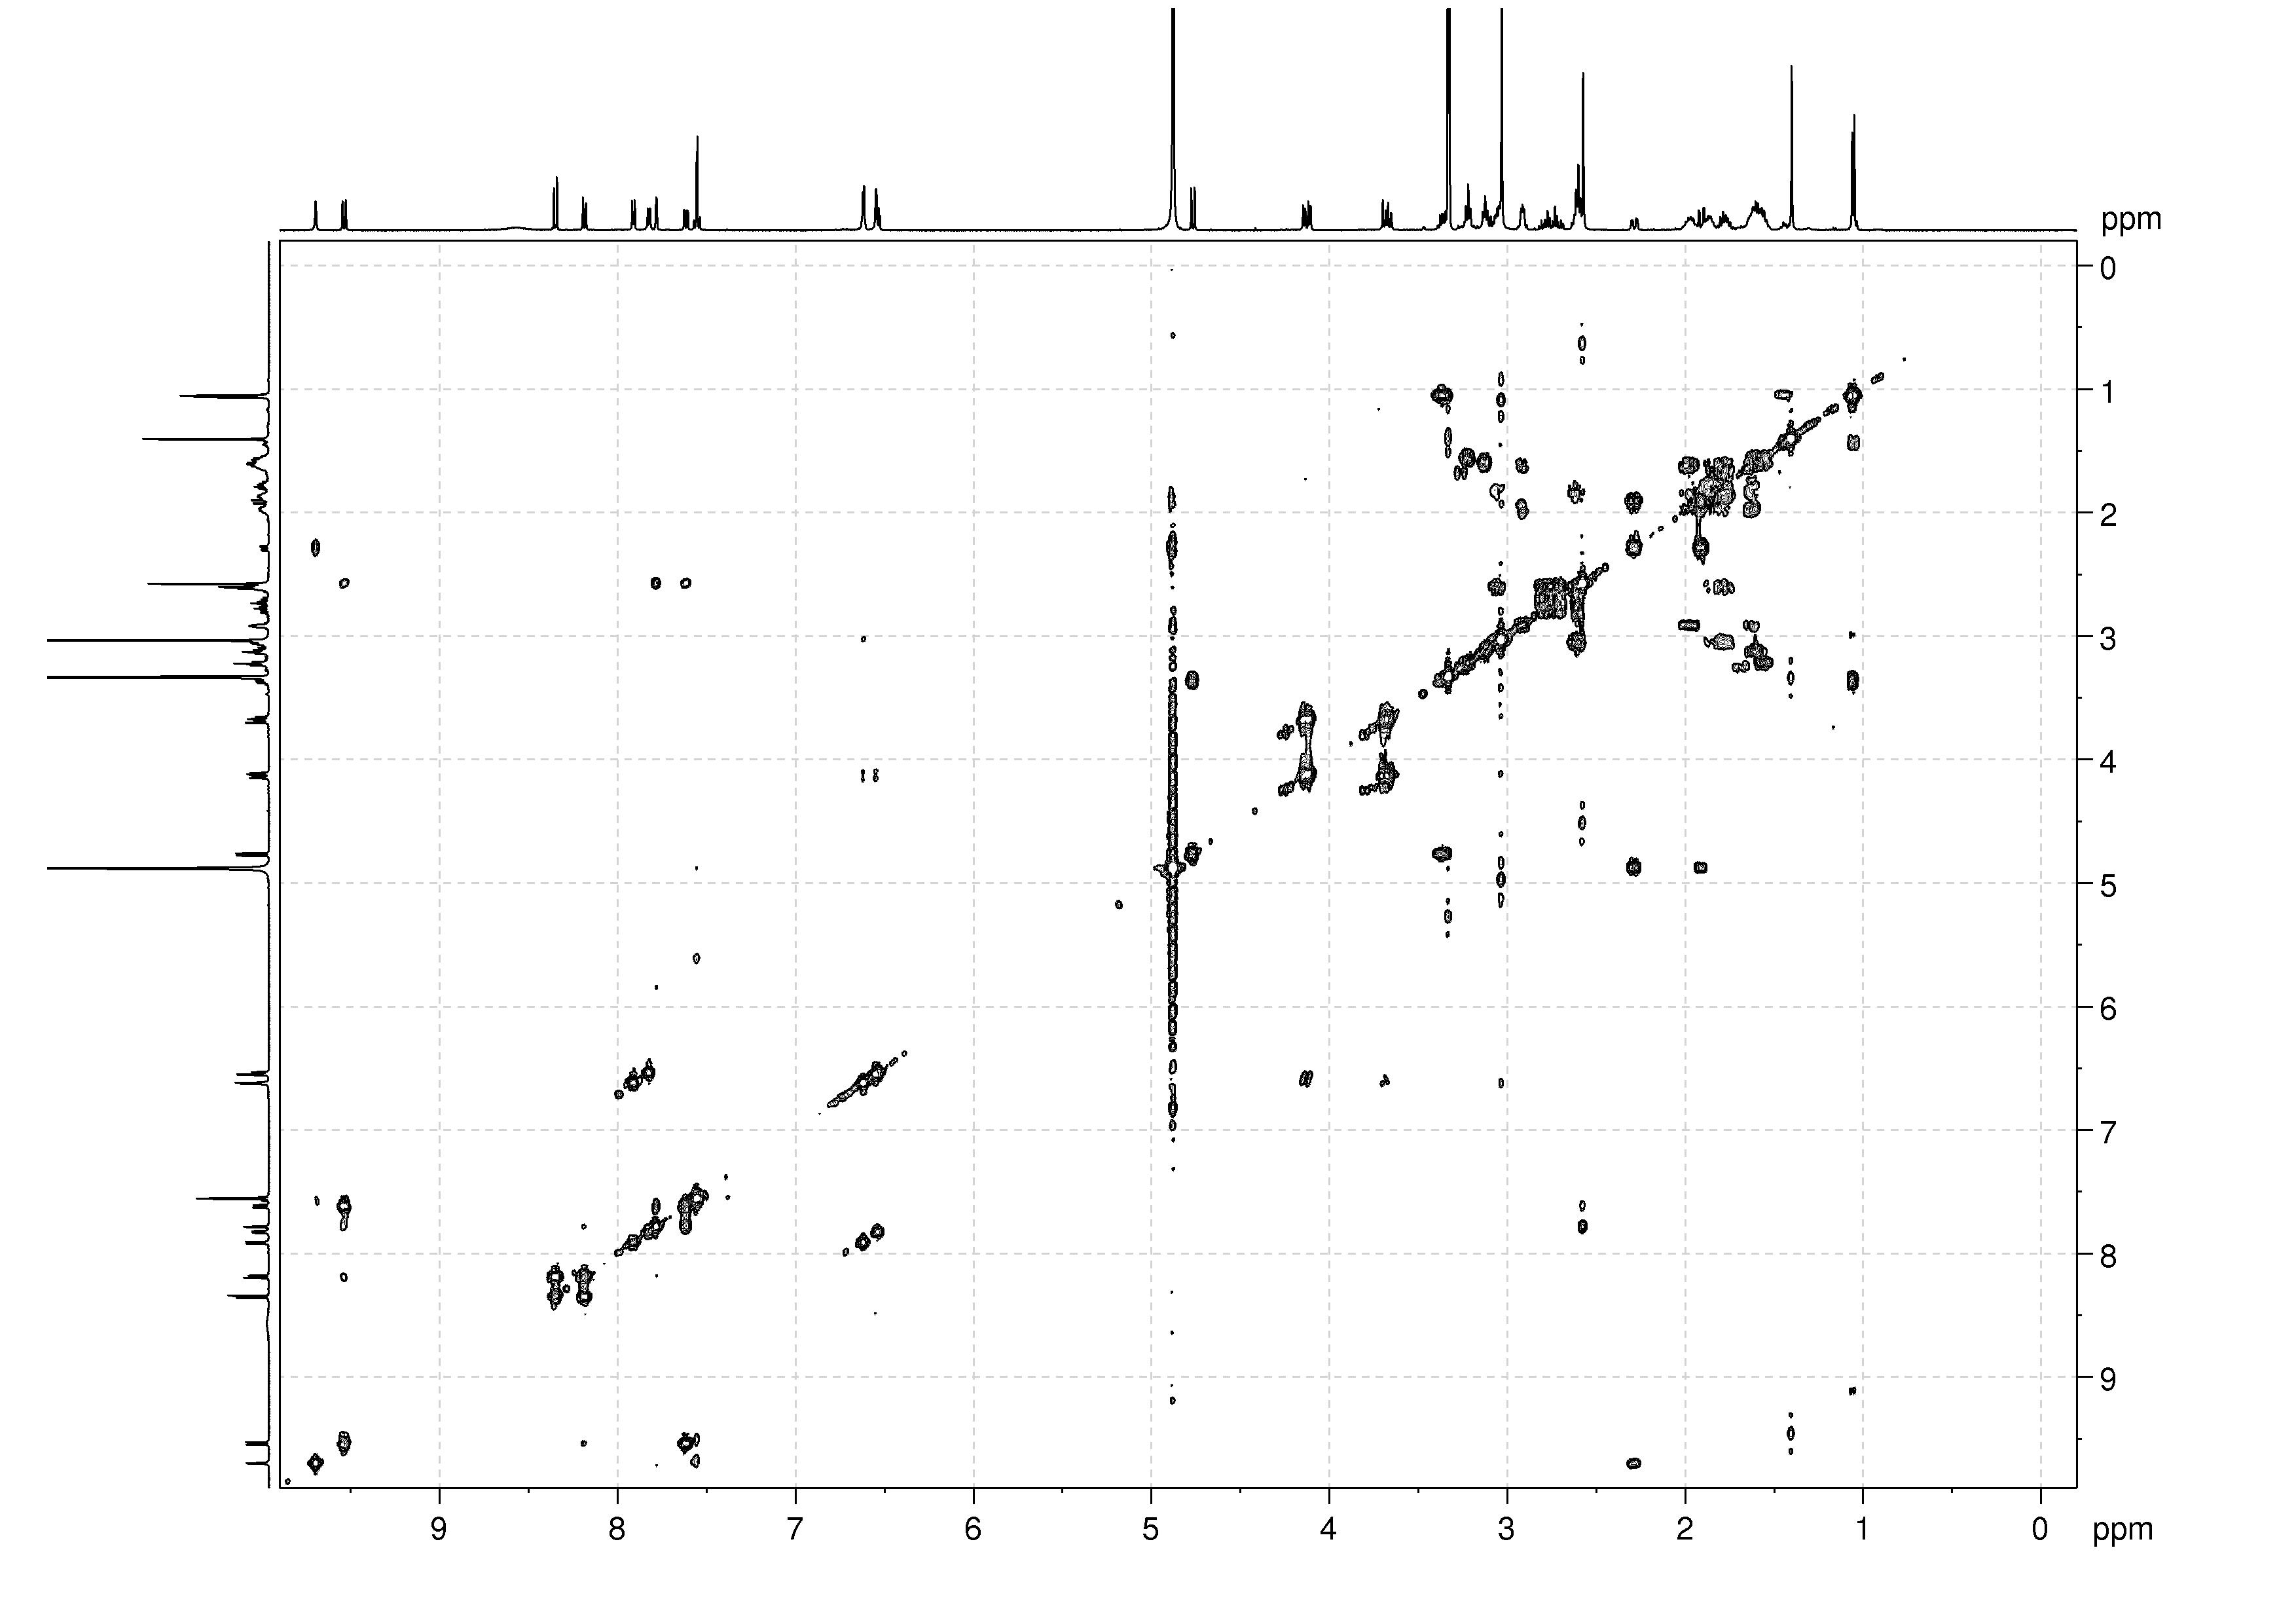


HSQCNMR spectrum of fentomycin, **39** in methanol-*d4*


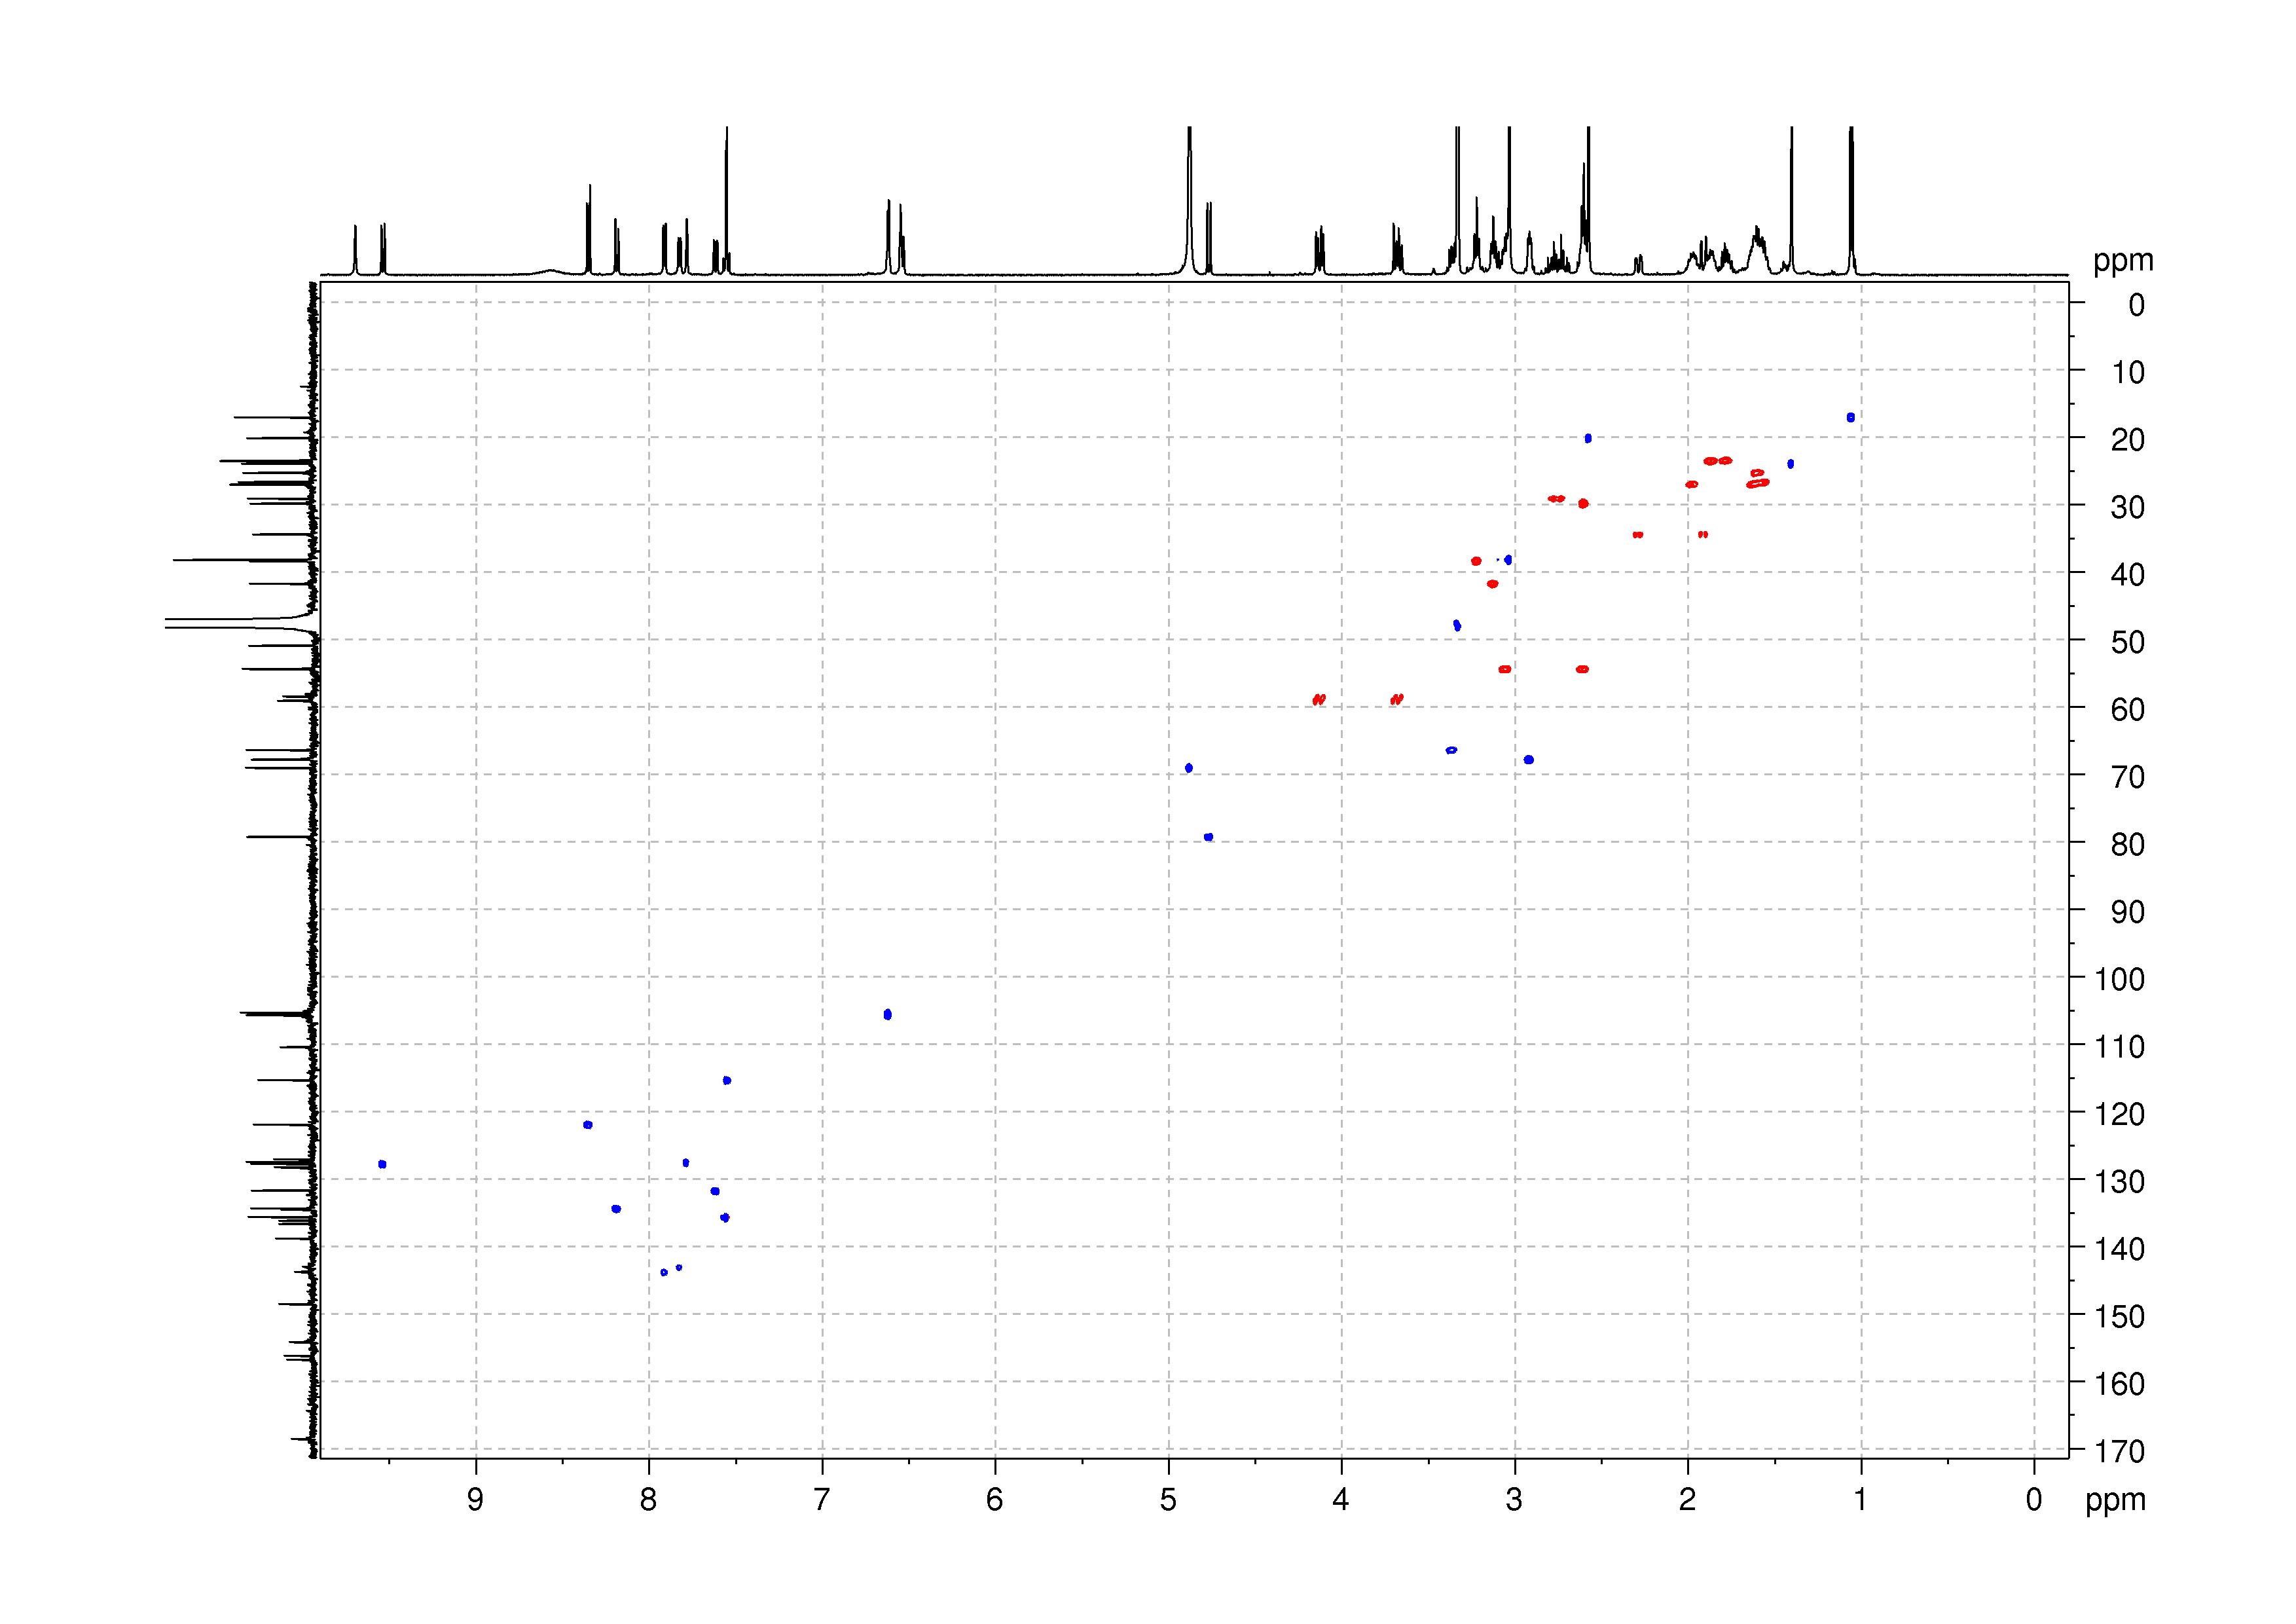


HMBCNMR spectrum of fentomycin, **39** in methanol-*d4*


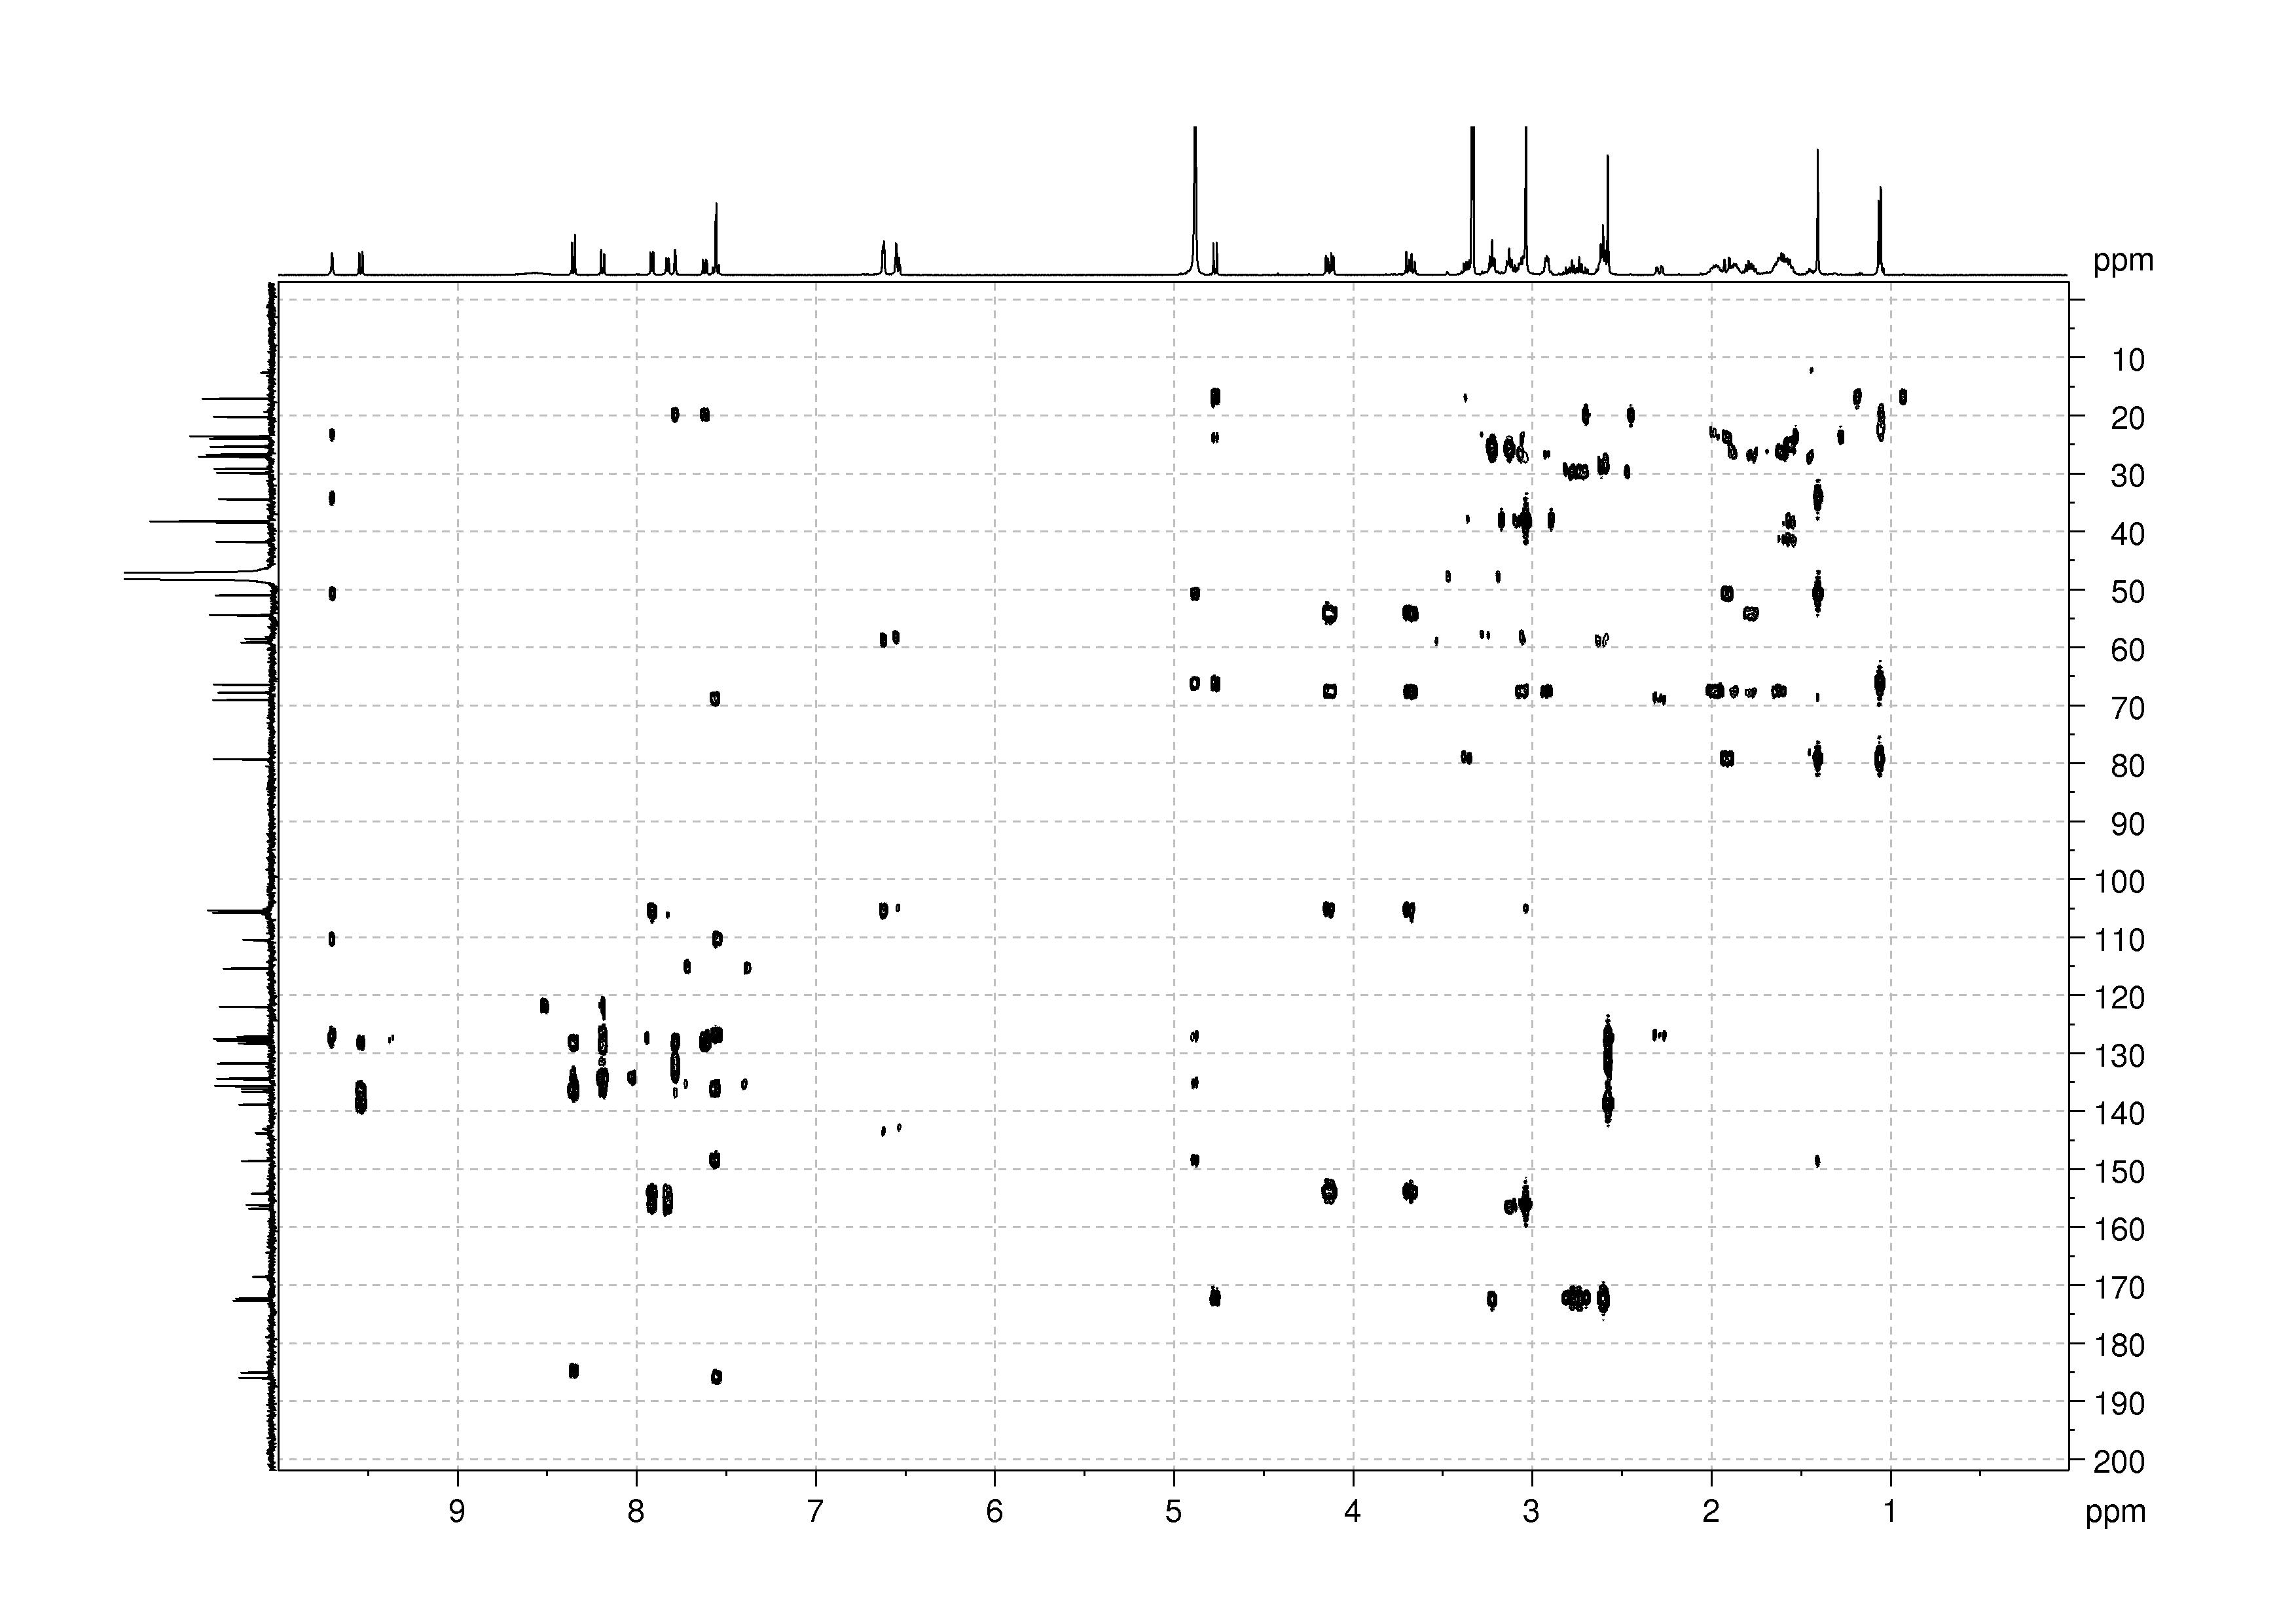


1H NMR spectrum of **41** in methanol-*d4*

13C NMR spectrum of **41** in methanol-*d4*

1H NMR spectrum of **42** in methanol-*d4*

13C NMR spectrum of **42** in methanol-*d4*

1H NMR spectrum of cWhite-Chen ligand, **43** in methanol-*d4*

13C NMR spectrum of cWhite-Chen ligand, **43** in methanol-*d4*

**HRMS spectrum of** fentomycin

**Absorption/Emission spectrum of fentomycin.**

***Spectroscopic measurements.*** The absorption of the samples was measured with a SpectraMax M2E Spectrometer (Molecular Devices). The emission was measured by irradiation of the sample in fluorescence quartz cuvettes (width 1 cm) in the wavelength range of 200-800 nm. Measurements were performed on the molecules dispersed in MeOH.

***Fluorescence quantum yield measurements.*** For the determination of the fluorescence quantum yield, the samples were prepared in MeOH with an absorbance of 0.2 at 520 nm. This solution was irradiated in fluorescence quartz cuvettes (width 1 cm) on a SpectraMax M2E Spectrometer (Molecular Devices). The fluorescence quantum yields were determined by comparison with the reference Rhodamine in EtOH (Φem = 70%)53 applying the following formula:

Φfluo,sample = Φfluo.reference × (*F*ref/*F*sample) × (*I*sample/*I*ref) × (*n*sample/*n*ref)2

*F*= 1- 10-A

Φfluo = fluorescence quantum yield, *F* = fraction of light absorbed, *I* = integrated emission intensities, *n* = refractive index, A = absorbance of the sample at the irradiation wavelength.

Photophysical characterisation of marmycin A and fentomycin in methanol

| **Compound** | **exc (nm)** | **ε (L.mol-1.cm-1)** | **em (nm)** | **ΦF** |
| --- | --- | --- | --- | --- |
| Marmycin A | 522 | 6456 | 650 | < 1% |
| Fentomycin | 516 | 2888 | 635 | 1% |

+ 1 eq Fe2+

+ 5 eq Fe2+

+ 10 eq Fe2+

+ 1 eq Cu2+

+ 5 eq Cu2+

+ 10 eq Cu2+
