# Supplementary material for: Activation of lysosomal iron triggers ferroptosis in cancer
Source: Research Square preprint supplement (doi:10.21203/rs.3.rs-4165774/v1), 2024-04-08
Supplement: Supplementary file 5 [file ad90a01e617592fa5a3dc958.xlsx]

## Sheet: Title
	Supplementary Table 5
	Quantitative mass spectrometry-based lipidomics of oxidised phospholipids and lysophospholipids
	of dissociated murine tumors

## Sheet: PC and PCOx
precursorexpmz$A	sumcomposition	precursorppmdev$A	name	intensity:E8_Sebastian_10_00.mzML	intensity:E8_Sebastian_10_31.mzML	intensity:E8_Sebastian_10_32.mzML	intensity:E8_Sebastian_10_33.mzML	intensity:E8_Sebastian_10_34.mzML	intensity:E8_Sebastian_10_35.mzML	intensity:E8_Sebastian_10_36.mzML	intensity:E8_Sebastian_10_37.mzML	intensity:E8_Sebastian_10_38.mzML	intensity:E8_Sebastian_10_39.mzML	intensity:E8_Sebastian_10_40.mzML	intensity:E8_Sebastian_10_41.mzML	intensity:E8_Sebastian_10_42.mzML	name	intensity:E8_Sebastian_10_31.mzML	intensity:E8_Sebastian_10_32.mzML	intensity:E8_Sebastian_10_33.mzML	intensity:E8_Sebastian_10_34.mzML	intensity:E8_Sebastian_10_35.mzML	intensity:E8_Sebastian_10_36.mzML	intensity:E8_Sebastian_10_37.mzML	intensity:E8_Sebastian_10_38.mzML	intensity:E8_Sebastian_10_39.mzML	intensity:E8_Sebastian_10_40.mzML	intensity:E8_Sebastian_10_41.mzML	intensity:E8_Sebastian_10_42.mzML	name	intensity:E8_Sebastian_10_31.mzML	intensity:E8_Sebastian_10_32.mzML	intensity:E8_Sebastian_10_33.mzML	intensity:E8_Sebastian_10_34.mzML	intensity:E8_Sebastian_10_35.mzML	intensity:E8_Sebastian_10_36.mzML	intensity:E8_Sebastian_10_37.mzML	intensity:E8_Sebastian_10_38.mzML	intensity:E8_Sebastian_10_39.mzML	intensity:E8_Sebastian_10_40.mzML	intensity:E8_Sebastian_10_41.mzML	intensity:E8_Sebastian_10_42.mzML
				raw intensity													nmol
###	Phosphatidylcholine			0	Ctrl Mouse 1	Ctrl Mouse 2	Ctrl Mouse 3	Ctrl Mouse 4	Ctrl Mouse 5	Ctrl Mouse 6	Ctrl Mouse 7	Ctrl Mouse 8	Fento Mouse 1	Fento Mouse 2	Fento Mouse 3	Fento Mouse 4	total PC nmol	3352.95	3514.98	4415.1	5494.45	2766.94	3450.95	2115.4	2301.75	2061.26	1889.8	2713.75	2234.46		normalized to total PC
762.6	H85 C42 N1 O8 P1	-0.48ppm	PC 34:0	3.33148e+08	8.16749e+07	101155919	98688923	7.46787e+07	9.01502e+07	8.90027e+07	110820761	1.0394e+08	2.78498e+07	7.09567e+07	6.59193e+07	8.85227e+07		Ctrl Mouse 1	Ctrl Mouse 2	Ctrl Mouse 3	Ctrl Mouse 4	Ctrl Mouse 5	Ctrl Mouse 6	Ctrl Mouse 7	Ctrl Mouse 8	Fento Mouse 1	Fento Mouse 2	Fento Mouse 3	Fento Mouse 4		Ctrl Mouse 1	Ctrl Mouse 2	Ctrl Mouse 3	Ctrl Mouse 4	Ctrl Mouse 5	Ctrl Mouse 6	Ctrl Mouse 7	Ctrl Mouse 8	Fento Mouse 1	Fento Mouse 2	Fento Mouse 3	Fento Mouse 4					Lipo 1
678.507	H73 C36 N1 O8 P1	-0.07ppm	PC 28:0	0	253845	337665	512819	473632	204487	205951	244526	219559	0	0	0	111805	PC 28:0	0.932399	1.00142	1.55889	1.90268	0.680487	0.694196	0.661951	0.633711	0	0	0	0.378903	PC 28:0	0.000278083	0.0002849	0.000353083	0.000346291	0.000245935	0.000201161	0.00031292	0.000275317	0	0	0	0.000169573					1	2	3
706.538	H77 C38 N1 O8 P1	-0.05ppm	PC 30:0	0	1.2606e+07	1.39936e+07	2.2217e+07	2.28407e+07	1.10081e+07	1.62964e+07	1.22521e+07	11340857	3.22845e+06	6.44034e+06	9.60113e+06	1.09378e+07	PC 30:0	46.3031	41.5012	67.5363	91.7559	36.6326	54.93	33.1673	32.7329	34.7771	27.2293	43.6949	37.0679	PC 30:0	0.0138097	0.0118069	0.0152967	0.0166997	0.0132394	0.0159174	0.015679	0.0142209	0.0168717	0.0144086	0.0161013	0.0165892				MUFA	0.337712	0.337941	0.344958
734.569	H81 C40 N1 O8 P1	-0.09ppm	PC 32:0	0	6.43535e+07	9.47441e+07	1.23846e+08	1.65339e+08	8.82227e+07	1.03921e+08	7.47168e+07	5.94849e+07	2.36977e+07	46336483	7.26678e+07	8.49607e+07	PC 32:0	236.377	280.984	376.475	664.203	293.586	350.286	202.264	171.69	255.273	195.907	330.713	287.929	PC 32:0	0.0704981	0.0799391	0.0852699	0.120886	0.106105	0.101504	0.095615	0.0745912	0.123843	0.103666	0.121865	0.128858				MUFA Ox	0.000983852	0.00113429	0.000948304
844.679	H95 C48 N1 O8 P1	-0.01ppm	PC 40:1	0	1.37843e+07	3.20519e+06	3.97833e+06	2.48016e+06	3.06094e+06	9.37151e+06	2.25898e+06	6.08583e+06	1.26133e+06	4.53076e+06	7.2822e+06	991045	PC 40:1	50.631	9.5057	12.0935	9.96332	10.1861	31.5884	6.11522	17.5654	13.5872	19.1557	33.1415	3.35861	PC 40:1	0.0151004	0.00270434	0.00273913	0.00181334	0.00368137	0.00915353	0.00289081	0.00763133	0.00659168	0.0101364	0.0122124	0.0015031				Sum	0.338696	0.339076	0.345907
704.522	H75 C38 N1 O8 P1	-0.08ppm	PC 30:1	0	1.04087e+06	1.29941e+06	2.59896e+06	1.70094e+06	655509	1.05864e+06	1.13564e+06	977552	89210.2	115388	402331	612415	PC 30:1	3.82322	3.85368	7.90047	6.83303	2.18139	3.56833	3.07427	2.82149	0.960979	0.48785	1.83102	2.07545	PC 30:1	0.00114026	0.00109636	0.00178942	0.00124362	0.000788376	0.00103401	0.00145328	0.0012258	0.000466209	0.000258149	0.000674718	0.000928839				% MUFA Ox	0.00290482	0.00334523	0.0027415
732.554	H79 C40 N1 O8 P1	0.09ppm	PC 32:1	28895.7	3.93122e+07	4.58119e+07	8.04659e+07	5.93712e+07	2.88733e+07	4.08152e+07	3.92181e+07	3.82742e+07	7203053	1.51e+07	2.33375e+07	2.29552e+07	PC 32:1	144.398	135.865	244.605	238.507	96.084	137.575	106.166	110.47	77.5918	63.8418	106.209	77.7944	PC 32:1	0.0430658	0.0386532	0.0554019	0.0434086	0.0347257	0.0398658	0.0501873	0.047994	0.0376428	0.0337824	0.0391374	0.0348158					1	1.15161	0.943777
760.585	H83 C42 N1 O8 P1	-0.18ppm	PC 34:1	0	2.52302e+08	2.18742e+08	2.84737e+08	2.43358e+08	1.59272e+08	2.33871e+08	1.50069e+08	1.99586e+08	4.1351e+07	1.12441e+08	6.78916e+07	1.08585e+08	PC 34:1	926.731	648.727	865.56	977.619	530.02	788.306	406.247	576.063	445.436	475.394	308.976	367.992	PC 34:1	0.276393	0.18456	0.196045	0.177928	0.191555	0.228431	0.192043	0.250272	0.216099	0.251558	0.113856	0.16469					0	0.203656	-0.0834825
788.616	H87 C44 N1 O8 P1	-0.38ppm	PC 36:1	0	7.65692e+07	7.06848e+07	9.12897e+07	9.10958e+07	6.46886e+07	8.68026e+07	5.31673e+07	5.53004e+07	1.54263e+07	37622660	6.06043e+07	4.48577e+07	PC 36:1	281.246	209.631	277.507	365.951	215.269	292.584	143.928	159.613	166.173	159.066	275.812	152.021	PC 36:1	0.0838802	0.0596393	0.0628542	0.0666037	0.0778005	0.0847837	0.0680381	0.0693441	0.080617	0.0841709	0.101635	0.0680349
816.648	H91 C46 N1 O8 P1	0.07ppm	PC 38:1	0	7.1482e+06	3.48376e+06	4.56701e+06	4.50657e+06	3695791	6.7737e+06	2.82115e+06	3.87075e+06	1.11474e+06	2.57774e+06	4.1405e+06	2.18028e+06	PC 38:1	26.256	10.3318	13.8831	18.1038	12.2988	22.832	7.63707	11.1721	12.0081	10.8985	18.8435	7.3889	PC 38:1	0.00783073	0.00293937	0.00314445	0.00329493	0.0044449	0.00661615	0.00361023	0.00485373	0.00582558	0.00576702	0.0069437	0.0033068				PUFA	0.287065	0.286217	0.279716
872.71	H99 C50 N1 O8 P1	-0.07ppm	PC 42:1	0	2.02295e+07	4.72179e+06	5.03746e+06	2.72956e+06	3.68725e+06	1.28809e+07	2.89534e+06	1.02651e+07	1493595	6.03103e+06	1.00408e+07	529333	PC 42:1	74.3049	14.0035	15.3131	10.9652	12.2704	43.4175	7.83789	29.6279	16.0891	25.4988	45.6958	1.79389	PC 42:1	0.022161	0.00398395	0.00346836	0.00199569	0.00443463	0.0125813	0.00370516	0.0128719	0.00780546	0.0134929	0.0168386	0.000802831				PUFA Ox	0.00272393	0.00659141	0.00389066
758.569	H81 C42 N1 O8 P1	0.07ppm	PC 34:2	0	6.48713e+07	1.23253e+08	1.37919e+08	1.22478e+08	7.54001e+07	84276160	7.37295e+07	6.91235e+07	1.64304e+07	35879475	5.26661e+07	6.14152e+07	PC 34:2	238.279	365.535	419.253	492.019	250.915	284.068	199.591	199.51	176.989	151.696	239.685	208.134	PC 34:2	0.0710654	0.103993	0.0949589	0.0895484	0.0906831	0.082316	0.0943515	0.0866776	0.0858644	0.080271	0.0883222	0.0931474				Sum	0.289789	0.292808	0.283607
786.601	H85 C44 N1 O8 P1	-0.27ppm	PC 36:2	0	7.22258e+07	1.22397e+08	163432752	1.45898e+08	1.00472e+08	1.11809e+08	8.70873e+07	7.09644e+07	2.07903e+07	43440293	67028277	8.25139e+07	PC 36:2	265.292	362.996	496.812	586.103	334.347	376.873	235.752	204.823	223.954	183.663	305.047	279.637	PC 36:2	0.0791221	0.103271	0.112526	0.106672	0.120836	0.109209	0.111445	0.0889859	0.108649	0.0971863	0.112408	0.125147				% PUFA Ox	0.00939971	0.022511	0.0137185
814.632	H89 C46 N1 O8 P1	-0.12ppm	PC 38:2	0	5.80636e+06	7.80108e+06	1.20118e+07	1.06912e+07	6.48837e+06	7.90143e+06	6.11814e+06	4793512	1.25113e+06	3.31684e+06	4.53593e+06	5.19805e+06	PC 38:2	21.3273	23.1358	36.514	42.9487	21.5919	26.6332	16.5623	13.8354	13.4772	14.0234	20.6431	17.616	PC 38:2	0.00636077	0.00658206	0.00827026	0.00781675	0.00780352	0.00771765	0.00782938	0.00601083	0.00653834	0.00742056	0.00760685	0.00788379
842.663	H93 C48 N1 O8 P1	-0.12ppm	PC 40:2	0	4.12938e+06	1.82054e+06	2.4814e+06	2.14401e+06	1.68911e+06	3.46671e+06	1.39562e+06	2.02914e+06	121074	1552196	2.75137e+06	1.00286e+06	PC 40:2	15.1676	5.3992	7.54309	8.61292	5.621	11.6852	3.77805	5.85668	1.30422	6.56258	12.5216	3.39865	PC 40:2	0.00452366	0.00153605	0.00170848	0.00156757	0.00203148	0.00338608	0.00178598	0.00254445	0.000632729	0.00347263	0.00461411	0.00152102					1	2.39487	1.45946
702.507	H73 C38 N1 O8 P1	0.51ppm	PC 30:2	0	0	26345.2	72453.9	66176.4	0	38769.1	0	0	0	0	0	0	PC 30:2	0	0.0781325	0.220249	0.265844	0	0.130678	0	0	0	0	0	0	PC 30:2	0	2.22284e-05	4.98855e-05	4.83842e-05	0	3.78674e-05	0	0	0	0	0	0					0	1.25994	0.545438
730.538	H77 C40 N1 O8 P1	0.17ppm	PC 32:2	0	3.18018e+06	3988368	7.36266e+06	5.42236e+06	2.4836e+06	3.42248e+06	3.84364e+06	3.20583e+06	460876	962968	2.03658e+06	2.11298e+06	PC 32:2	11.6811	11.8284	22.3814	21.7827	8.26487	11.5361	10.405	9.25294	4.96459	4.07136	9.26853	7.1608	PC 32:2	0.00348383	0.00336513	0.00506929	0.0039645	0.00298701	0.00334288	0.0049187	0.00401996	0.00240852	0.00215439	0.00341539	0.00320472
780.554	H79 C44 N1 O8 P1	-0.20ppm	PC 36:5	0	3.18187e+06	4.92354e+06	5.59564e+06	5.21588e+06	2.3425e+06	2.62871e+06	3.07653e+06	3.06256e+06	394947	816802	2228027	1.95094e+06	PC 36:5	11.6873	14.6018	17.0099	20.9533	7.79532	8.86054	8.32839	8.83941	4.2544	3.45338	10.1398	6.61168	PC 36:5	0.00348568	0.00415417	0.00385268	0.00381353	0.00281731	0.00256756	0.00393703	0.0038403	0.00206398	0.00182738	0.00373645	0.00295896
754.538	H77 C42 N1 O8 P1	-0.20ppm	PC 34:4	11936.5	1182253	1.36096e+06	1.91447e+06	1.75016e+06	815892	1.07297e+06	1.01326e+06	1.0327e+06	101674	81160.2	755369	692255	PC 34:4	4.34253	4.03621	5.8197	7.03077	2.71511	3.61665	2.74296	2.98068	1.09523	0.34314	3.4377	2.34603	PC 34:4	0.00129514	0.00114829	0.00131814	0.00127961	0.000981267	0.00104802	0.00129666	0.00129496	0.000531341	0.000181575	0.00126677	0.00104993				Total
756.554	H79 C42 N1 O8 P1	-0.01ppm	PC 34:3	0	4.12756e+06	6.28556e+06	9710966	7.13704e+06	3.2963e+06	4.5617e+06	4.60431e+06	4.59678e+06	882383	1836615	2.51235e+06	2892910	PC 34:3	15.1609	18.6412	29.5199	28.671	10.9694	15.3761	12.4642	13.2676	9.50509	7.76508	11.4337	9.80397	PC 34:3	0.00452167	0.00530336	0.00668613	0.00521817	0.00396443	0.0044556	0.00589213	0.00576415	0.0046113	0.00410895	0.00421326	0.00438763				Total Ox
812.616	H87 C46 N1 O8 P1	-0.10ppm	PC 38:3	0	1.01698e+07	1.66432e+07	2.16209e+07	2.00482e+07	1.31235e+07	1.5426e+07	1.21039e+07	9.34939e+06	2.67948e+06	5721181	8.6736e+06	1.06095e+07	PC 38:3	37.3547	49.3592	65.7245	80.5379	43.6721	51.9961	32.7662	26.985	28.8636	24.1888	39.4737	35.9552	PC 38:3	0.0111408	0.0140425	0.0148863	0.014658	0.0157835	0.0150672	0.0154894	0.0117237	0.0140029	0.0127997	0.0145458	0.0160913				Sum
810.601	H85 C46 N1 O8 P1	-0.14ppm	PC 38:4	52521.1	5.10574e+07	80343496	9.89039e+07	1.02468e+08	6.65236e+07	6.79588e+07	5.54108e+07	4.56845e+07	1.37977e+07	2.95966e+07	4.54916e+07	5.72906e+07	PC 38:4	187.539	238.276	300.654	411.634	221.376	229.068	150.001	131.858	148.63	125.133	207.033	194.156	PC 38:4	0.0559324	0.0677888	0.0680967	0.0749182	0.0800075	0.0663782	0.0709091	0.0572861	0.0721061	0.0662148	0.0762903	0.0868917				% Ox
808.585	H83 C46 N1 O8 P1	-0.24ppm	PC 38:5	0	2.60982e+07	4.05092e+07	47346499	4.38217e+07	2.184e+07	2.50597e+07	2.46949e+07	2.4075e+07	4.75742e+06	1.15157e+07	1.7187e+07	1.72463e+07	PC 38:5	95.8614	120.139	143.926	176.041	72.6787	84.4683	66.8508	69.4874	51.2473	48.6876	78.2183	58.4471	PC 38:5	0.0285902	0.0341791	0.0325987	0.0320398	0.0262668	0.0244768	0.031602	0.030189	0.0248621	0.0257634	0.0288229	0.0261572
806.569	H81 C46 N1 O8 P1	0.07ppm	PC 38:6	0	3.17514e+07	7.14088e+07	5.48254e+07	5.00533e+07	2.68825e+07	2.52112e+07	2.65207e+07	3.32722e+07	5.77745e+06	1.35195e+07	2.43301e+07	2.00927e+07	PC 38:6	116.626	211.778	166.661	201.075	89.4589	84.9789	71.7936	96.0329	62.2351	57.1595	110.727	68.0935	PC 38:6	0.0347831	0.0602503	0.037748	0.0365959	0.0323313	0.0246248	0.0339385	0.0417217	0.0301927	0.0302463	0.0408021	0.0304743
804.553	H79 C46 N1 O8 P1	-0.50ppm	PC 38:7	32465	1.47518e+06	2.59729e+06	2.55662e+06	2.54337e+06	945485	846754	1440083	1.55633e+06	0	156054	910831	763860	PC 38:7	5.41848	7.70284	7.77176	10.2173	3.14636	2.85414	3.89841	4.49202	0	0.659787	4.14521	2.58869	PC 38:7	0.00161603	0.00219143	0.00176027	0.00185956	0.00113713	0.000827059	0.00184287	0.00195157	0	0.000349131	0.00152748	0.00115853
728.522	H75 C40 N1 O8 P1	-0.26ppm	PC 32:3	0	143588	161317	389151	217914	82055.5	152860	181984	212030	0	0	144724	60876	PC 32:3	0.527414	0.478421	1.18296	0.875408	0.273063	0.515245	0.492646	0.611978	0	0	0.658643	0.206307	PC 32:3	0.000157298	0.000136109	0.000267936	0.000159326	9.86875e-05	0.000149305	0.000232885	0.000265875	0	0	0.000242705	9.23296e-05
784.585	H83 C44 N1 O8 P1	-0.37ppm	PC 36:3	4.82429e+06	2.94652e+07	5.19027e+07	6.64847e+07	5.28896e+07	3.07008e+07	3.67535e+07	3.33033e+07	3.08732e+07	6.04547e+06	1.41721e+07	2.12122e+07	2.48855e+07	PC 36:3	108.229	153.929	202.104	212.468	102.166	123.884	90.1544	89.1087	65.1222	59.9186	96.5371	84.3359	PC 36:3	0.0322786	0.0437923	0.0457756	0.0386696	0.0369237	0.0358986	0.0426182	0.0387135	0.0315934	0.0317063	0.0355733	0.0377434
840.648	H91 C48 N1 O8 P1	0.06ppm	PC 40:3	0	1.36164e+06	1.52544e+06	2167375	2.20329e+06	1.33551e+06	2.00441e+06	1.17488e+06	996396	120255	240885	986239	1.2256e+06	PC 40:3	5.00142	4.52404	6.58851	8.85109	4.44429	6.75625	3.18049	2.87588	1.2954	1.01845	4.4884	4.1535	PC 40:3	0.00149165	0.00128707	0.00149227	0.00161091	0.00160621	0.00195779	0.00150349	0.00124943	0.000628447	0.000538918	0.00165394	0.00185884
838.632	H89 C48 N1 O8 P1	-0.08ppm	PC 40:4	0	5.3618e+06	7.95774e+06	9.09812e+06	1.15867e+07	7.73012e+06	9.14509e+06	5206102	4.15105e+06	1.67279e+06	3.12059e+06	5.57878e+06	6.88371e+06	PC 40:4	19.6944	23.6004	27.657	46.5462	25.7241	30.8252	14.0933	11.9811	18.0194	13.1936	25.3892	23.3286	PC 40:4	0.00587375	0.00671424	0.00626418	0.0084715	0.00929695	0.00893238	0.00666224	0.00520522	0.0087419	0.0069815	0.00935574	0.0104404
836.616	H87 C48 N1 O8 P1	-0.15ppm	PC 40:5	0	7.78019e+06	1.18429e+07	1.39169e+07	1.55065e+07	8.68824e+06	9.23577e+06	7.82386e+06	6.53769e+06	1.72743e+06	3.72891e+06	6.39908e+06	6587406	PC 40:5	28.5774	35.1226	42.3054	62.2928	28.9126	31.1309	21.1798	18.8696	18.6079	15.7656	29.1224	22.3245	PC 40:5	0.00852306	0.00999226	0.00958199	0.0113374	0.0104493	0.00902095	0.0100122	0.00819796	0.00902745	0.00834247	0.0107314	0.00999101
834.601	H85 C48 N1 O8 P1	-0.26ppm	PC 40:6	110430	2.11173e+07	40425975	4.18868e+07	4.41928e+07	2.53955e+07	2.48777e+07	2.31307e+07	2.18226e+07	4.84545e+06	1.0126e+07	1.80788e+07	2.1248e+07	PC 40:6	77.5659	119.892	127.33	177.532	84.5105	83.8549	62.6164	62.9863	52.1955	42.8119	82.2769	72.0086	PC 40:6	0.0231336	0.0341089	0.0288397	0.0323111	0.0305429	0.0242991	0.0296003	0.0273645	0.0253221	0.0226542	0.0303185	0.0322264
832.585	H83 C48 N1 O8 P1	-0.34ppm	PC 40:7	12736.1	9.76194e+06	1.62401e+07	1.89711e+07	1.86417e+07	8.57433e+06	8.20847e+06	1.02192e+07	9.6975e+06	1.77865e+06	4.10162e+06	6.81744e+06	6.63421e+06	PC 40:7	35.8566	48.1634	57.6695	74.8875	28.5335	27.6682	27.6642	27.9897	19.1597	17.3413	31.0263	22.4831	PC 40:7	0.010694	0.0137023	0.0130619	0.0136297	0.0103123	0.00801755	0.0130776	0.0121602	0.00929514	0.00917629	0.011433	0.010062
830.569	H81 C48 N1 O8 P1	-0.41ppm	PC 40:8	228072	4246014	7.51075e+06	6.76621e+06	7.92177e+06	3.30953e+06	2.9377e+06	3726108	3.98788e+06	793212	1.84048e+06	3.20595e+06	3.1137e+06	PC 40:8	15.596	22.2748	20.5683	31.8234	11.0134	9.90205	10.0869	11.5102	8.54453	7.78144	14.5903	10.5522	PC 40:8	0.00465143	0.0063371	0.00465863	0.00579192	0.00398035	0.00286937	0.0047683	0.00500061	0.00414529	0.0041176	0.00537645	0.00472249
782.569	H81 C44 N1 O8 P1	-0.18ppm	PC 36:4	0	5.3481e+07	9.59364e+07	9.43362e+07	84854843	5.13158e+07	5.24547e+07	4.97043e+07	5.21958e+07	1.14066e+07	2.6974e+07	3.8084e+07	4.15991e+07	PC 36:4	196.441	284.52	286.768	340.88	170.768	176.808	134.553	150.652	122.873	114.044	173.321	140.978	PC 36:4	0.0585875	0.0809451	0.0649517	0.0620407	0.0617171	0.0512346	0.0636065	0.065451	0.0596106	0.0603473	0.0638676	0.0630927
870.695	H97 C50 N1 O8 P1	0.05ppm	PC 42:2	0	5.93228e+06	1.76667e+06	2.22591e+06	1.55254e+06	1.70963e+06	4308046	1.16474e+06	3.0364e+06	293905	2.02719e+06	3.26371e+06	666488	PC 42:2	21.7898	5.23944	6.76645	6.23688	5.68928	14.5211	3.15304	8.76391	3.16597	8.57082	14.8532	2.2587	PC 42:2	0.0064987	0.0014906	0.00153257	0.00113512	0.00205616	0.00420784	0.00149052	0.0038075	0.00153593	0.00453531	0.00547332	0.00101085
868.679	H95 C50 N1 O8 P1	0.17ppm	PC 42:3	0	1.25721e+06	693303	899810	791944	614294	1.31234e+06	470054	658652	60370.7	304401	918962	411138	PC 42:3	4.61784	2.05614	2.73529	3.1814	2.04423	4.42349	1.27247	1.90106	0.650317	1.28699	4.18222	1.39333	PC 42:3	0.00137725	0.000584965	0.000619531	0.000579021	0.000738806	0.00128182	0.000601527	0.000825918	0.000315495	0.000681019	0.00154112	0.000623567
866.663	H93 C50 N1 O8 P1	0.05ppm	PC 42:4	0	1.18973e+06	1.09127e+06	1.31618e+06	1.45446e+06	1.03187e+06	1.33526e+06	736206	634073	0	158001	968480	872796	PC 42:4	4.37001	3.23641	4.00099	5.84285	3.43383	4.50074	1.99296	1.83011	0	0.668017	4.40757	2.95787	PC 42:4	0.00130333	0.000920747	0.000906207	0.00106341	0.00124102	0.0013042	0.000942121	0.000795097	0	0.000353486	0.00162416	0.00132375
864.648	H91 C50 N1 O8 P1	0.43ppm	PC 42:5	23642.3	812596	1.25795e+06	1423742	1.74677e+06	797342	1.22354e+06	721365	727005	112464	158120	533515	791755	PC 42:5	2.98474	3.73073	4.32797	7.01714	2.65338	4.12416	1.95279	2.09834	1.21147	0.668518	2.42804	2.68323	PC 42:5	0.000890185	0.00106138	0.000980266	0.00127713	0.000958957	0.00119508	0.00092313	0.00091163	0.000587731	0.000353751	0.000894716	0.00120084
862.632	H89 C50 N1 O8 P1	0.41ppm	PC 42:6	0	772196	1.25439e+06	1.6094e+06	1.64757e+06	891285	1.02714e+06	655091	663329	51601.5	157792	510830	558521	PC 42:6	2.83635	3.72017	4.89234	6.61861	2.966	3.46216	1.77338	1.91456	0.555855	0.667135	2.3248	1.89281	PC 42:6	0.000845927	0.00105838	0.00110809	0.0012046	0.00107194	0.00100325	0.000838319	0.000831783	0.000269667	0.000353019	0.000856673	0.0008471
860.616	H87 C50 N1 O8 P1	0.03ppm	PC 42:7	0	918368	1.34069e+06	1.7479e+06	2.10204e+06	944288	993999	905302	847326	0	0	474236	717503	PC 42:7	3.37325	3.97612	5.31337	8.44433	3.14238	3.35046	2.45072	2.44562	0	0	2.15826	2.43159	PC 42:7	0.00100606	0.00113119	0.00120345	0.00153688	0.00113569	0.000970879	0.00115851	0.00106251	0	0	0.000795304	0.00108822
858.601	H85 C50 N1 O8 P1	-0.25ppm	PC 42:8	0	594451	1016014	1.06753e+06	1623633	710313	588997	566823	451908	0	0	488463	760355	PC 42:8	2.18348	3.01321	3.24512	6.52247	2.36376	1.98532	1.53443	1.30433	0	0	2.22301	2.57682	PC 42:8	0.000651211	0.000857248	0.000735006	0.0011871	0.000854288	0.000575297	0.000725363	0.000566671	0	0	0.000819163	0.00115322
856.585	H83 C50 N1 O8 P1	-0.44ppm	PC 42:9	0	588297	757485	613942	665417	395357	480151	475840	645231	0	0	226438	302725	PC 42:9	2.16087	2.24649	1.86629	2.67312	1.31566	1.61844	1.28813	1.86232	0	0	1.03052	1.02592	PC 42:9	0.000644469	0.000639118	0.000422707	0.000486513	0.000475493	0.000468983	0.000608932	0.000809089	0	0	0.000379741	0.000459138
854.569	H81 C50 N1 O8 P1	-0.61ppm	PC 42:10	0	1.19944e+06	2.13922e+06	2.47833e+06	4.49588e+06	1.57072e+06	1.09561e+06	1.45093e+06	1.18937e+06	134199	278283	1.32836e+06	1.51034e+06	PC 42:10	4.40565	6.34434	7.53375	18.0609	5.22701	3.69295	3.92776	3.43287	1.4456	1.17656	6.04541	5.1185	PC 42:10	0.00131396	0.00180494	0.00170636	0.00328711	0.0018891	0.00107013	0.00185675	0.00149142	0.000701317	0.000622586	0.00222769	0.00229071
###	PhosphatidylcholineOx
748.549	H79 C40 N1 O9 P1	0.83ppm	PCOx 32:1	0	59644.6	204764	407880	325301	37242	226240	100336	24520.3	64537	541243	84383.4	73613.7	PCOx 32:1	0.21908	0.607274	1.2399	1.3068	0.123933	0.762582	0.271616	0.0707726	0.695197	2.28834	0.384031	0.249474	PCOx 32:1	6.53396e-05	0.000172767	0.000280831	0.00023784	4.47907e-05	0.000220977	0.000128399	3.07473e-05	0.000337268	0.00121089	0.000141513	0.000111649
804.612	H87 C44 N1 O9 P1	0.66ppm	PCOx 36:1	0	0	134888	302614	359103	319526	226818	106092	0	0	0	0	323738	PCOx 36:1	0	0.40004	0.919901	1.44259	1.06331	0.764531	0.287199	0	0	0	0	1.09714	PCOx 36:1	0	0.00011381	0.000208353	0.000262555	0.000384292	0.000221542	0.000135766	0	0	0	0	0.000491008
776.58	H83 C42 N1 O9 P1	0.05ppm	PCOx 34:1	0	369646	888709	1.30035e+06	1.37545e+06	1313595	1.20415e+06	629254	284275	2369978	239883	2.45904e+06	1.03053e+06	PCOx 34:1	1.35774	2.63566	3.95288	5.52547	4.37135	4.05882	1.70344	0.820498	25.5296	1.01421	11.1911	3.49244	PCOx 34:1	0.00040494	0.000749836	0.000895309	0.00100565	0.00157985	0.00117615	0.000805255	0.000356467	0.0123854	0.000536676	0.00412386	0.00156299
774.564	H81 C42 N1 O9 P1	0.05ppm	PCOx 34:2	0	928591	2.11003e+06	3730059	3.14006e+06	2.17787e+06	2.58752e+06	1.45123e+06	656113	347161	701822	1.5821e+06	2.12588e+06	PCOx 34:2	3.41081	6.25776	11.3388	12.6143	7.24746	8.72172	3.92859	1.89373	3.73964	2.96725	7.20017	7.20451	PCOx 34:2	0.00101726	0.00178031	0.0025682	0.00229582	0.0026193	0.00252734	0.00185714	0.000822734	0.00181425	0.00157014	0.00265322	0.00322428
746.534	H77 C40 N1 O9 P1	0.96ppm	PCOx 32:2	0	123703	254180	760239	461791	223689	266982	217320	85018.3	0	0	90151.2	217910	PCOx 32:2	0.454372	0.753826	2.31102	1.85511	0.744389	0.899911	0.5883	0.245387	0	0	0.41028	0.738488	PCOx 32:2	0.000135514	0.000214461	0.000523435	0.000337634	0.000269029	0.000260772	0.000278104	0.000106609	0	0	0.000151185	0.0003305
770.533	H77 C42 N1 O9 P1	0.28ppm	PCOx 34:4	0	0	183653	321721	258070	102575	124848	84328.8	29821.3	0	0	0	144009	PCOx 34:4	0	0.544664	0.977984	1.03672	0.341346	0.420822	0.228284	0.0860727	0	0	0	0.488043	PCOx 34:4	0	0.000154955	0.000221509	0.000188685	0.000123366	0.000121944	0.000107915	3.73945e-05	0	0	0	0.000218417
772.549	H79 C42 N1 O9 P1	0.06ppm	PCOx 34:3	0	567194	1.43741e+06	2653740	1.86747e+06	1.13573e+06	1.63145e+06	996346	412662	104925	296426	906954	1.23477e+06	PCOx 34:3	2.08336	4.26295	8.06698	7.50203	3.77947	5.49911	2.69718	1.19106	1.13026	1.25327	4.12757	4.1846	PCOx 34:3	0.000621352	0.00121279	0.00182714	0.00136538	0.00136594	0.0015935	0.00127502	0.000517459	0.000548334	0.000663175	0.00152098	0.00187276
802.595	H85 C44 N1 O9 P1	-0.32ppm	PCOx 36:2	0	663262	1.39947e+06	2.5905e+06	2.26172e+06	2.08767e+06	2.23967e+06	1.20394e+06	405475	173816	539594	1.38005e+06	1950454	PCOx 36:2	2.43623	4.15043	7.87475	9.0858	6.94729	7.54923	3.25916	1.17032	1.87236	2.28136	6.28064	6.61002	PCOx 36:2	0.000726592	0.00118078	0.0017836	0.00165363	0.00251082	0.00218758	0.00154068	0.000508447	0.000908354	0.0012072	0.00231437	0.00295822
800.58	H83 C44 N1 O9 P1	-0.33ppm	PCOx 36:3	0	1.02004e+06	2.51185e+06	4.60915e+06	3.72597e+06	2.7389e+06	3.37623e+06	1.94974e+06	841186	482739	1045850	1.84622e+06	2.91167e+06	PCOx 36:3	3.74671	7.44945	14.0112	14.968	9.11447	11.3802	5.2781	2.4279	5.2001	4.42178	8.40217	9.86755	PCOx 36:3	0.00111744	0.00211934	0.00317346	0.00272421	0.00329406	0.0032977	0.00249508	0.00105481	0.00252277	0.00233982	0.00309614	0.00441608
798.564	H81 C44 N1 O9 P1	-0.19ppm	PCOx 36:4	0	955640	2.22097e+06	3537135	2.22856e+06	1.61315e+06	88884.8	1.38428e+06	901490	227970	535574	1.32858e+06	2.08481e+06	PCOx 36:4	3.51016	6.58678	10.7524	8.95258	5.3682	0.299603	3.74734	2.60196	2.45571	2.26437	6.04638	7.06535	PCOx 36:4	0.00104689	0.00187392	0.00243537	0.00162939	0.00194012	8.68174e-05	0.00177146	0.00113043	0.00119136	0.00119821	0.00222805	0.003162
796.549	H79 C44 N1 O9 P1	-0.08ppm	PCOx 36:5	0	375003	917916	1.23333e+06	774861	604533	677422	571932	215294	140692	286066	432437	723098	PCOx 36:5	1.37742	2.72228	3.74913	3.11278	2.01175	2.28338	1.54826	0.621401	1.51554	1.20947	1.96803	2.45055	PCOx 36:5	0.000410809	0.00077448	0.000849162	0.000566531	0.000727067	0.000661665	0.0007319	0.000269969	0.000735249	0.000639998	0.000725206	0.00109671
828.611	H87 C46 N1 O9 P1	-0.42ppm	PCOx 38:3	0	297896	641571	1.00055e+06	965428	833158	882612	601050	239228	0	108857	248729	743194	PCOx 38:3	1.0942	1.90272	3.04152	3.87832	2.77256	2.97501	1.62709	0.69048	0	0.46024	1.13197	2.51866	PCOx 38:3	0.00032634	0.000541317	0.000688892	0.000705862	0.00100203	0.000862084	0.000769162	0.00029998	0	0.000243539	0.000417125	0.00112719
826.595	H85 C46 N1 O9 P1	-0.72ppm	PCOx 38:4	42256.1	790077	1.65253e+06	2.76661e+06	2.45928e+06	1.8301e+06	151247	1318058	618780	356569	569040	1.28596e+06	2.05235e+06	PCOx 38:4	2.90203	4.90094	8.4101	9.87945	6.09018	0.509805	3.56808	1.78598	3.84099	2.40586	5.85243	6.95534	PCOx 38:4	0.000865515	0.0013943	0.00190485	0.00179808	0.00220105	0.000147729	0.00168672	0.000775921	0.00186341	0.00127308	0.00215658	0.00311276
824.58	H83 C46 N1 O9 P1	-0.38ppm	PCOx 38:5	0	874922	1.59572e+06	2.3325e+06	1.80703e+06	1.48263e+06	697899	1.24646e+06	734517	230730	433123	1.24964e+06	1.70497e+06	PCOx 38:5	3.21367	4.73246	7.09048	7.25921	4.93385	2.3524	3.37426	2.12003	2.48544	1.83121	5.68714	5.77808	PCOx 38:5	0.000958462	0.00134637	0.00160596	0.00132119	0.00178314	0.000681666	0.00159509	0.000921049	0.00120578	0.000969	0.00209567	0.0025859
822.564	H81 C46 N1 O9 P1	-0.48ppm	PCOx 38:6	0	730918	1649666	2.07523e+06	1.20486e+06	951702	291725	984888	618119	766142	338400	818918	1.213e+06	PCOx 38:6	2.68474	4.89245	6.30841	4.84018	3.16705	0.983312	2.66616	1.78407	8.25293	1.43073	3.72692	4.11081	PCOx 38:6	0.000800708	0.00139188	0.00142883	0.000880922	0.0011446	0.000284939	0.00126036	0.000775092	0.00400382	0.000757082	0.00137334	0.00183974
820.548	H79 C46 N1 O9 P1	-0.50ppm	PCOx 38:7	0	304899	792270	778738	469729	362414	375564	386657	195652	0	0	84060.9	414626	PCOx 38:7	1.11992	2.34965	2.36725	1.887	1.20603	1.26591	1.04671	0.564708	0	0	0.382563	1.40515	PCOx 38:7	0.000334012	0.000668468	0.000536171	0.000343438	0.000435873	0.000366829	0.000494805	0.000245338	0	0	0.000140972	0.000628856
854.627	H89 C48 N1 O9 P1	-0.24ppm	PCOx 40:4	0	97587.2	204186	331935	360118	286779	279667	196375	104490	0	0	48901.6	234731	PCOx 40:4	0.358447	0.605558	1.00903	1.44667	0.954336	0.942669	0.531601	0.301587	0	0	0.222552	0.795496	PCOx 40:4	0.000106905	0.000172279	0.000228542	0.000263297	0.000344906	0.000273162	0.000251301	0.000131025	0	0	8.2009e-05	0.000356013
852.611	H87 C48 N1 O9 P1	-0.26ppm	PCOx 40:5	0	212428	365807	498480	489224	325671	390526	261708	77817.1	678362	2141985	218242	389771	PCOx 40:5	0.780271	1.08488	1.51531	1.96531	1.08376	1.31634	0.708462	0.224602	7.30736	9.05616	0.993224	1.32092	PCOx 40:5	0.000232712	0.000308645	0.00034321	0.000357691	0.000391682	0.000381443	0.000334907	9.75789e-05	0.00354509	0.00479213	0.000365996	0.000591159
850.595	H85 C48 N1 O9 P1	-0.49ppm	PCOx 40:6	0	374026	824948	1.08204e+06	950386	818790	749345	649910	323858	678223	219797	467619	860813	PCOx 40:6	1.37383	2.44656	3.28924	3.8179	2.72475	2.52581	1.75935	0.934747	7.30587	0.929288	2.12814	2.91726	PCOx 40:6	0.000409739	0.000696039	0.000744997	0.000694865	0.000984752	0.000731916	0.000831689	0.000406103	0.00354436	0.000491739	0.000784206	0.00130558
848.58	H83 C48 N1 O9 P1	-0.12ppm	PCOx 40:7	0	288153	850729	979562	695433	642844	578606	522985	395169	101216	63356.2	382351	662391	PCOx 40:7	1.05841	2.52302	2.97773	2.7937	2.13924	1.9503	1.41576	1.14057	1.0903	0.267866	1.74009	2.24482	PCOx 40:7	0.000315667	0.000717792	0.000674442	0.000508458	0.000773144	0.000565148	0.000669264	0.000495523	0.000528948	0.000141743	0.000641211	0.00100464
846.564	H81 C48 N1 O9 P1	-0.48ppm	PCOx 40:8	0	175313	431913	542297	333284	183328	136301	253820	163066	0	0	0	351948	PCOx 40:8	0.643943	1.28093	1.6485	1.33887	0.610075	0.459429	0.687111	0.470654	0	0	0	1.19274	PCOx 40:8	0.000192053	0.000364421	0.000373379	0.000243677	0.000220487	0.000133131	0.000324814	0.000204476	0	0	0	0.000533794
																		0	0	0	0	0	0	0	0	0	0	0	0		0	0	0	0	0	0	0	0	0	0	0	0
###	PhosphatidylcholineOx2																	0	0	0	0	0	0	0	0	0	0	0	0		0	0	0	0	0	0	0	0	0	0	0	0
766.56	H81 C40 N1 O10 P1	0.50ppm	PCOx2 32:0	0	40503.9	101798	0	0	0	0	0	79172.5	0	0	65664.5	0	PCOx2 32:0	0.148775	0.301905	0	0	0	0	0	0.228514	0	0	0.298841	0	PCOx2 32:0	4.43713e-05	8.5891e-05	0	0	0	0	0	9.92785e-05	0	0	0.000110121	0
792.575	H83 C42 N1 O10 P1	-0.14ppm	PCOx2 34:1	0	54164.5	159611	566146	0	90351	76625.9	195410	116820	1342032	151040	242454	341150	PCOx2 34:1	0.198952	0.473362	1.721	0	0.300668	0.258282	0.528988	0.337177	14.4565	0.638587	1.10341	1.15614	PCOx2 34:1	5.93363e-05	0.00013467	0.000389799	0	0.000108664	7.48436e-05	0.000250065	0.000146487	0.0070134	0.000337913	0.0004066	0.000517416
790.56	H81 C42 N1 O10 P1	0.54ppm	PCOx2 34:2	41513.1	4.19503e+06	2.47778e+06	4.19123e+06	3.38265e+06	1.89804e+06	3.35368e+06	1.5467e+06	2.36059e+06	450083	2.27319e+06	2.35218e+06	2.52742e+06	PCOx2 34:2	15.4088	7.34841	12.7407	13.5888	6.31627	11.3042	4.18704	6.81333	4.84832	9.61088	10.7048	8.56532	PCOx2 34:2	0.00459559	0.0020906	0.00288572	0.00247319	0.00228276	0.00327568	0.00197932	0.00296007	0.00235211	0.00508567	0.00394466	0.00383329
874.653	H93 C48 N1 O10 P1	-0.07ppm	PCOx2 40:2	0	666007	39133.6	0	0	0	255524	0	357970	0	0	0	0	PCOx2 40:2	2.44631	0.116059	0	0	0	0.861292	0	1.0332	0	0	0	0	PCOx2 40:2	0.000729599	3.30185e-05	0	0	0	0.000249581	0	0.000448878	0	0	0	0
818.591	H85 C44 N1 O10 P1	0.61ppm	PCOx2 36:2	0	584542	1.05558e+06	2.16263e+06	1.84169e+06	1.21401e+06	1.81361e+06	875080	284067	185315	671100	940495	1.66454e+06	PCOx2 36:2	2.14708	3.13057	6.57408	7.39844	4.03996	6.1131	2.36891	0.819899	1.99622	2.83737	4.28021	5.64106	PCOx2 36:2	0.000640356	0.000890636	0.001489	0.00134653	0.00146008	0.00177142	0.00111984	0.000356207	0.000968446	0.00150141	0.00157723	0.00252458
846.622	H89 C46 N1 O10 P1	-0.36ppm	PCOx2 38:2	0	642942	53857.9	158735	0	42816	344200	40290.8	235088	0	112342	174962	0	PCOx2 38:2	2.36159	0.159727	0.482532	0	0.142482	1.16019	0.10907	0.678531	0	0.474975	0.796255	0	PCOx2 38:2	0.000704331	4.54419e-05	0.000109291	0	5.14945e-05	0.000336194	5.15601e-05	0.000294789	0	0.000251337	0.000293415	0
814.559	H81 C44 N1 O10 P1	-0.14ppm	PCOx2 36:4	0	1.00041e+06	2.83891e+06	4846433	3.20678e+06	2.26535e+06	2.74502e+06	1.78837e+06	928057	236851	1853857	1.61349e+06	2.44955e+06	PCOx2 36:4	3.67461	8.41941	14.7325	12.8823	7.53857	9.25259	4.84125	2.67864	2.55137	7.83798	7.34304	8.30145	PCOx2 36:4	0.00109593	0.00239529	0.00333683	0.0023446	0.00272451	0.00268117	0.00228858	0.00116374	0.00123777	0.00414752	0.00270586	0.0037152
812.543	H79 C44 N1 O10 P1	-0.37ppm	PCOx2 36:5	0	795872	942931	1.41969e+06	954246	758636	936016	591713	594656	0	109938	584857	1.04613e+06	PCOx2 36:5	2.92331	2.79647	4.31566	3.8334	2.52457	3.15502	1.60181	1.71635	0	0.464808	2.6617	3.5453	PCOx2 36:5	0.000871863	0.000795585	0.000977478	0.000697687	0.000912406	0.000914245	0.000757215	0.00074567	0	0.000245956	0.000980818	0.00158665
788.544	H79 C42 N1 O10 P1	-0.01ppm	PCOx2 34:3	0	1.25214e+06	1.95755e+06	2.83765e+06	2.06232e+06	1.61977e+06	2.04993e+06	1.18911e+06	874834	198423	853625	1.52664e+06	1796357	PCOx2 34:3	4.59923	5.80553	8.62604	8.28476	5.39024	6.90966	3.21901	2.52502	2.13742	3.60907	6.94778	6.08779	PCOx2 34:3	0.0013717	0.00165165	0.00195376	0.00150784	0.00194809	0.00200225	0.0015217	0.001097	0.00103695	0.00190976	0.00256021	0.0027245
844.606	H87 C46 N1 O10 P1	-0.25ppm	PCOx2 38:3	0	301755	284938	333454	358418	289671	386626	157814	105522	16550.4	3273822	0	253124	PCOx2 38:3	1.10838	0.845045	1.01365	1.43984	0.96396	1.30319	0.427213	0.304566	0.178282	13.8415	0	0.857829	PCOx2 38:3	0.000330567	0.000240413	0.000229587	0.000262053	0.000348385	0.000377633	0.000201954	0.000132319	8.64917e-05	0.00732432	0	0.000383909
842.59	H85 C46 N1 O10 P1	-0.17ppm	PCOx2 38:4	0	783310	2.05822e+06	3.53818e+06	3.0667e+06	1.89118e+06	2.52781e+06	1.50339e+06	552706	318704	12443666	1.62423e+06	2.5204e+06	PCOx2 38:4	2.87717	6.10411	10.7556	12.3196	6.29344	8.52046	4.06979	1.59527	3.4331	52.611	7.39189	8.54153	PCOx2 38:4	0.000858102	0.0017366	0.00243608	0.00224219	0.00227451	0.00246902	0.00192389	0.000693066	0.00166553	0.0278395	0.00272386	0.00382264
840.575	H83 C46 N1 O10 P1	-0.03ppm	PCOx2 38:5	0	861548	1.85636e+06	3.19874e+06	2.2435e+06	1.64428e+06	2.01185e+06	1.45749e+06	766638	172060	441485	1.45573e+06	2.20842e+06	PCOx2 38:5	3.16455	5.50545	9.72371	9.01259	5.47178	6.78133	3.94555	2.21273	1.85344	1.86657	6.62504	7.48427	PCOx2 38:5	0.00094381	0.00156628	0.00220238	0.00164031	0.00197756	0.00196506	0.00186515	0.000961327	0.000899177	0.000987708	0.00244128	0.00334948
838.559	H81 C46 N1 O10 P1	-0.02ppm	PCOx2 38:6	0	552378	1.60228e+06	2.06265e+06	1.36416e+06	1047844	1.17184e+06	920240	520597	245033	242342	762515	1.26433e+06	PCOx2 38:6	2.02894	4.75191	6.27016	5.48012	3.48699	3.94991	2.49116	1.50259	2.63952	1.0246	3.47022	4.28476	PCOx2 38:6	0.000605121	0.0013519	0.00142016	0.000997392	0.00126023	0.00114459	0.00117763	0.000652804	0.00128053	0.000542177	0.00127875	0.00191759
836.543	H79 C46 N1 O10 P1	-0.20ppm	PCOx2 38:7	0	528064	702236	1.03059e+06	513310	386020	513981	399188	487458	1253722	113728	399744	597370	PCOx2 38:7	1.93963	2.08263	3.13286	2.06207	1.28459	1.73247	1.08063	1.40694	13.5052	0.480833	1.81924	2.02447	PCOx2 38:7	0.000578485	0.000592502	0.000709578	0.000375301	0.000464263	0.000502026	0.00051084	0.000611249	0.0065519	0.000254436	0.000670379	0.000906022
816.575	H83 C44 N1 O10 P1	-0.15ppm	PCOx2 36:3	0	929356	2.65194e+06	4423214	3.50805e+06	2.36239e+06	3058975	1.7487e+06	710561	302930	804221	1.6192e+06	2.86708e+06	PCOx2 36:3	3.41362	7.8649	13.4459	14.0926	7.8615	10.3108	4.73385	2.05088	3.26318	3.40019	7.36902	9.71643	PCOx2 36:3	0.00101809	0.00223754	0.00304544	0.00256487	0.00284122	0.00298783	0.0022378	0.00089101	0.0015831	0.00179924	0.00271543	0.00434845
872.638	H91 C48 N1 O10 P1	1.03ppm	PCOx2 40:3	0	267595	36517.5	0	49807.7	28329.5	136640	0	76958.1	0	0	0	61751.6	PCOx2 40:3	0.982903	0.108301	0	0.200088	0.0942743	0.460572	0	0.222123	0	0	0	0.209274	PCOx2 40:3	0.000293146	3.08112e-05	0	3.64164e-05	3.40717e-05	0.000133462	0	9.65018e-05	0	0	0	9.36576e-05
870.622	H89 C48 N1 O10 P1	0.73ppm	PCOx2 40:4	0	130496	272242	312646	339056	234014	402436	110796	0	0	0	0	161475	PCOx2 40:4	0.479324	0.807394	0.950397	1.36206	0.778746	1.35648	0.299932	0	0	0	0	0.547232	PCOx2 40:4	0.000142956	0.000229701	0.000215261	0.000247898	0.000281447	0.000393075	0.000141785	0	0	0	0	0.000244906
868.606	H87 C48 N1 O10 P1	0.08ppm	PCOx2 40:5	0	127936	321948	616383	411846	311938	428710	207304	80330.8	0	0	326651	371746	PCOx2 40:5	0.46992	0.954807	1.87372	1.65447	1.03806	1.44505	0.561188	0.231858	0	0	1.4866	1.25983	PCOx2 40:5	0.000140151	0.000271639	0.000424388	0.000301117	0.000375165	0.000418739	0.000265287	0.000100731	0	0	0.000547801	0.00056382
866.592	H85 C48 N1 O10 P1	1.59ppm	PCOx2 40:6	0	368548	698015	1.14586e+06	854042	624056	690694	530738	258493	247444	126512	318362	887102	PCOx2 40:6	1.35371	2.07012	3.48324	3.43086	2.07672	2.32811	1.43675	0.746085	2.66548	0.534885	1.44887	3.00636	PCOx2 40:6	0.000403738	0.000588941	0.000788937	0.000624424	0.000750548	0.000674629	0.000679185	0.000324138	0.00129313	0.000283038	0.0005339	0.00134545
864.575	H83 C48 N1 O10 P1	0.36ppm	PCOx2 40:7	0	239820	697868	1.09446e+06	649365	507233	599306	478069	163988	0	304411	173994	541748	PCOx2 40:7	0.880884	2.06968	3.32701	2.60863	1.68796	2.02007	1.29417	0.473317	0	1.28703	0.791853	1.83596	PCOx2 40:7	0.000262719	0.000588817	0.000753552	0.000474776	0.000610045	0.000585366	0.000611784	0.000205633	0	0.000681041	0.000291792	0.00082166
862.559	H81 C48 N1 O10 P1	0.10ppm	PCOx2 40:8	0	120173	338880	445755	226462	168356	218241	156391	113923	0	0	155176	251175	PCOx2 40:8	0.441406	1.00502	1.35503	0.909746	0.56025	0.735622	0.423361	0.328815	0	0	0.706212	0.851223	PCOx2 40:8	0.000131647	0.000285926	0.000306908	0.000165575	0.00020248	0.000213165	0.000200133	0.000142854	0	0	0.000260234	0.000380953
																		0	0	0	0	0	0	0	0	0	0	0	0		0	0	0	0	0	0	0	0	0	0	0	0
###	PhosphatidylcholineOx3																	0	0	0	0	0	0	0	0	0	0	0	0		0	0	0	0	0	0	0	0	0	0	0	0
808.569	H83 C42 N1 O11 P1	-0.66ppm	PCOx3 34:1	1157567	0	0	0	0	0	0	0	0	50922.2	43242	33434	0	PCOx3 34:1	0	0	0	0	0	0	0	0	0.548538	0.182824	0.152159	0	PCOx3 34:1	0	0	0	0	0	0	0	0	0.000266117	9.67427e-05	5.60695e-05	0
804.54	H79 C42 N1 O11 P1	1.63ppm	PCOx3 34:3	0	0	74291.6	141365	89550.5	0	0	36606.8	0	0	0	0	89070.3	PCOx3 34:3	0	0.220328	0.42973	0.359743	0	0	0.0990973	0	0	0	0	0.301856	PCOx3 34:3	0	6.26826e-05	9.7332e-05	6.54739e-05	0	0	4.68457e-05	0	0	0	0	0.000135091
832.571	H83 C44 N1 O11 P1	1.71ppm	PCOx3 36:3	107871	0	0	0	0	0	36066.2	0	0	0	0	0	0	PCOx3 36:3	0	0	0	0	0	0.121568	0	0	0	0	0	0	PCOx3 36:3	0	0	0	0	0	3.52273e-05	0	0	0	0	0	0
830.554	H81 C44 N1 O11 P1	0.31ppm	PCOx3 36:4	26597	354113	1235634	2.12124e+06	1.37621e+06	965995	1322606	660524	317118	0	274072	703149	1.18926e+06	PCOx3 36:4	1.30069	3.66454	6.44826	5.52852	3.21462	4.45809	1.78809	0.915292	0	1.15876	3.20005	4.03034	PCOx3 36:4	0.000387925	0.00104255	0.0014605	0.0010062	0.0011618	0.00129184	0.000845272	0.000397651	0	0.000613164	0.0011792	0.00180372
828.539	H79 C44 N1 O11 P1	1.06ppm	PCOx3 36:5	571847	154687	1.02687e+06	1.77346e+06	1129700	630017	806109	580082	164250	0	0	296242	767508	PCOx3 36:5	0.568179	3.0454	5.39107	4.53824	2.09656	2.71714	1.57033	0.474073	0	0	1.3482	2.60106	PCOx3 36:5	0.000169456	0.000866405	0.00122105	0.000825968	0.000757717	0.00078736	0.000742331	0.000205962	0	0	0.000496804	0.00116407
860.603	H87 C46 N1 O11 P1	2.07ppm	PCOx3 38:3	0	0	74190.5	211478	-1.7	144069	188147	0	0	0	0	13285.3	141714	PCOx3 38:3	0	0.220028	0.642862	-6.82925e-06	0.479428	0.634185	0	0	0	0	0.0604617	0.480263	PCOx3 38:3	0	6.25973e-05	0.000145605	-1.24294e-09	0.00017327	0.000183771	0	0	0	0	2.22797e-05	0.000214935
858.586	H85 C46 N1 O11 P1	0.22ppm	PCOx3 38:4	0	440937	1.24543e+06	2.21738e+06	1.70733e+06	1.17654e+06	1.5659e+06	951088	311390	189789	269926	776864	1.64012e+06	PCOx3 38:4	1.61961	3.6936	6.74052	6.85871	3.91527	5.27815	2.57467	0.898759	2.04442	1.14123	3.53553	5.55829	PCOx3 38:4	0.000483039	0.00105082	0.0015267	0.0012483	0.00141502	0.00152948	0.00121711	0.000390468	0.000991831	0.000603888	0.00130282	0.00248754
856.57	H83 C46 N1 O11 P1	-0.25ppm	PCOx3 38:5	0	385928	1.36384e+06	2.59421e+06	1.54777e+06	1.09362e+06	1.56518e+06	920868	301718	200523	136659	12931511	1.48844e+06	PCOx3 38:5	1.41755	4.04476	7.88601	6.21773	3.63933	5.27571	2.49286	0.870843	2.16005	0.577784	58.8516	5.04427	PCOx3 38:5	0.000422777	0.00115072	0.00178615	0.00113164	0.00131529	0.00152877	0.00117843	0.000378339	0.00104793	0.000305739	0.0216864	0.00225749
854.554	H81 C46 N1 O11 P1	-0.04ppm	PCOx3 38:6	49592.9	452469	1.13757e+06	1.88289e+06	976786	721636	987600	724128	335789	585455	810739	1.54257e+06	884220	PCOx3 38:6	1.66196	3.3737	5.72371	3.92395	2.40144	3.32889	1.96027	0.969183	6.30657	3.42775	7.02026	2.99659	PCOx3 38:6	0.000495671	0.000959807	0.00129639	0.000714166	0.000867906	0.000964629	0.000926666	0.000421064	0.00305956	0.00181382	0.00258692	0.00134108
852.539	H79 C46 N1 O11 P1	0.07ppm	PCOx3 38:7	0	78178.1	527348	829884	341006	170267	312893	242091	72689.4	0	0	105857	409280	PCOx3 38:7	0.287156	1.56397	2.52273	1.36989	0.566611	1.05466	0.655357	0.209802	0	0	0.481758	1.38703	PCOx3 38:7	8.56427e-05	0.000444943	0.000571386	0.000249323	0.000204779	0.000305616	0.000309803	9.1149e-05	0	0	0.000177525	0.000620748
884.601	H87 C48 N1 O11 P1	-0.05ppm	PCOx3 40:5	0	28859.7	136919	301476	290882	268047	286677	170866	17363.3	0	0	218715	251607	PCOx3 40:5	0.106004	0.406063	0.916445	1.16853	0.892	0.966297	0.462546	0.0501154	0	0	0.995375	0.852685	PCOx3 40:5	3.16153e-05	0.000115523	0.000207571	0.000212675	0.000322378	0.000280009	0.000218656	2.17727e-05	0	0	0.000366789	0.000381607
882.585	H85 C48 N1 O11 P1	-0.26ppm	PCOx3 40:6	0	173768	563767	1057160	563947	455447	580392	353954	123044	0	0	145085	579885	PCOx3 40:6	0.638266	1.67197	3.21361	2.26549	1.51563	1.95632	0.95818	0.355139	0	0	0.660284	1.96521	PCOx3 40:6	0.00019036	0.000475671	0.000727869	0.000412324	0.000547763	0.000566892	0.000452955	0.000154291	0	0	0.00024331	0.000879502
880.569	H83 C48 N1 O11 P1	-0.60ppm	PCOx3 40:7	0	102627	480698	840935	355977	330180	378589	318577	36331.7	0	0	434038	484167	PCOx3 40:7	0.376959	1.42562	2.55632	1.43004	1.09877	1.2761	0.862411	0.104864	0	0	1.97531	1.64082	PCOx3 40:7	0.000112426	0.000405583	0.000578995	0.000260269	0.000397105	0.000369783	0.000407682	4.55582e-05	0	0	0.00072789	0.000734328
878.554	H81 C48 N1 O11 P1	-0.43ppm	PCOx3 40:8	0	27960.4	311542	492353	218020	73140.7	105640	127135	29353.5	0	0	271262	208228	PCOx3 40:8	0.102701	0.923945	1.49668	0.875831	0.243396	0.356079	0.344165	0.0847225	0	0	1.23452	0.705675	PCOx3 40:8	3.06301e-05	0.000262859	0.000338992	0.000159403	8.79658e-05	0.000103183	0.000162695	3.68079e-05	0	0	0.000454912	0.000315815
																		0	0	0	0	0	0	0	0	0	0	0	0		0	0	0	0	0	0	0	0	0	0	0	0
																		0	0	0	0	0	0	0	0	0	0	0	0		0	0	0	0	0	0	0	0	0	0	0	0
###	PhosphatidylcholineOx4																	0	0	0	0	0	0	0	0	0	0	0	0		0	0	0	0	0	0	0	0	0	0	0	0
798.548	H81 C40 N1 O12 P1	-0.84ppm	PCOx4 32:0	0	0	0	21555.6	0	43766.5	0	0	0	0	0	0	0	PCOx4 32:0	0	0	0.0655259	0	0.145645	0	0	0	0	0	0	0	PCOx4 32:0	0	0	1.48413e-05	0	5.26376e-05	0	0	0	0	0	0	0
820.533	H79 C42 N1 O12 P1	-0.36ppm	PCOx4 34:3	130345	76371	30400.9	101112	0	0	43752.4	48078.8	166220	0	0	40770.6	30361.9	PCOx4 34:3	0.280518	0.0901605	0.307366	0	0	0.147476	0.130153	0.479757	0	0	0.185548	0.102895	PCOx4 34:3	8.36631e-05	2.56504e-05	6.96171e-05	0	0	4.27348e-05	6.15264e-05	0.000208431	0	0	6.83732e-05	4.60494e-05
848.565	H83 C44 N1 O12 P1	0.05ppm	PCOx4 36:3	14243.1	76091.3	298890	402507	231646	197062	287939	145540	59945	0	0	0	284821	PCOx4 36:3	0.279491	0.886425	1.22356	0.930572	0.655779	0.970552	0.393988	0.173018	0	0	0	0.965247	PCOx4 36:3	8.33567e-05	0.000252185	0.000277131	0.000169366	0.000237005	0.000281242	0.000186247	7.51682e-05	0	0	0	0.000431983
846.549	H81 C44 N1 O12 P1	0.22ppm	PCOx4 36:4	0	223189	803106	1.32416e+06	755684	517901	760191	389907	216627	0	0	161802	615561	PCOx4 36:4	0.819795	2.38179	4.02525	3.03574	1.72346	2.56237	1.05551	0.625246	0	0	0.736362	2.08611	PCOx4 36:4	0.0002445	0.00067761	0.0009117	0.00055251	0.000622876	0.00074251	0.000498964	0.00027164	0	0	0.000271345	0.00093361
844.534	H79 C44 N1 O12 P1	1.24ppm	PCOx4 36:5	0	37733	274536	518379	354160	144217	217965	112994	0	0	0	0	201849	PCOx4 36:5	0.138597	0.814197	1.5758	1.42273	0.479924	0.734691	0.305883	0	0	0	0	0.684058	PCOx4 36:5	4.13358e-05	0.000231636	0.000356911	0.00025894	0.000173449	0.000212895	0.000144598	0	0	0	0	0.00030614
842.519	H77 C44 N1 O12 P1	0.83ppm	PCOx4 36:6	0	0	42245.1	51311.1	0	0	0	35947.3	0	0	0	0	0	PCOx4 36:6	0	0.125287	0.155978	0	0	0	0.097312	0	0	0	0	0	PCOx4 36:6	0	3.56437e-05	3.53284e-05	0	0	0	4.60017e-05	0	0	0	0	0
876.596	H87 C46 N1 O12 P1	0.27ppm	PCOx4 38:3	0	39488.6	72866.3	124548	124733	0	77519	40240.7	0	0	0	0	48488.3	PCOx4 38:3	0.145045	0.216101	0.378608	0.501078	0	0.261292	0.108935	0	0	0	0	0.164325	PCOx4 38:3	4.32591e-05	6.148e-05	8.57529e-05	9.11971e-05	0	7.5716e-05	5.1496e-05	0	0	0	0	7.35414e-05
874.581	H85 C46 N1 O12 P1	0.27ppm	PCOx4 38:4	0	150617	626286	1.2671e+06	780760	582148	639664	430792	121838	100291	207027	427989	724724	PCOx4 38:4	0.553231	1.85739	3.8518	3.13648	1.93726	2.15611	1.16619	0.351659	1.08034	0.875295	1.94779	2.45606	PCOx4 38:4	0.000164998	0.00052842	0.000872415	0.000570845	0.000700146	0.000624786	0.000551284	0.000152779	0.000524116	0.000463168	0.000717746	0.00109918
872.565	H83 C46 N1 O12 P1	0.24ppm	PCOx4 38:5	0	202838	686253	1302256	696121	412894	594872	411371	84647.6	0	134133	151816	702902	PCOx4 38:5	0.745043	2.03523	3.95867	2.79646	1.37402	2.00513	1.11361	0.244317	0	0.567105	0.690919	2.38211	PCOx4 38:5	0.000222205	0.000579017	0.000896621	0.000508962	0.000496585	0.000581036	0.000526431	0.000106144	0	0.000300087	0.000254599	0.00106608
870.549	H81 C46 N1 O12 P1	0.06ppm	PCOx4 38:6	0	200103	740458	1.20225e+06	676800	490558	601113	400043	230669	0	0	255089	525920	PCOx4 38:6	0.734996	2.19599	3.65467	2.71885	1.63247	2.02616	1.08295	0.665776	0	0	1.16091	1.78233	PCOx4 38:6	0.000219209	0.000624752	0.000827767	0.000494835	0.00058999	0.000587132	0.000511935	0.000289248	0	0	0.000427789	0.000797655
868.534	H79 C46 N1 O12 P1	0.27ppm	PCOx4 38:7	0	0	225454	436235	234858	53511.5	51386.8	111344	0	0	0	0	138046	PCOx4 38:7	0	0.668632	1.32609	0.943474	0.178074	0.173209	0.301415	0	0	0	0	0.467833	PCOx4 38:7	0	0.000190224	0.000300354	0.000171714	6.43579e-05	5.01916e-05	0.000142486	0	0	0	0	0.000209372
902.61	H89 C48 N1 O12 P1	-1.39ppm	PCOx4 40:4	18029.7	17471.1	53461.9	143436	37016.2	0	84679.2	30641.3	0	0	0	0	83271.1	PCOx4 40:4	0.0641731	0.158553	0.436025	0.148702	0	0.285427	0.0829483	0	0	0	0	0.282203	PCOx4 40:4	1.91393e-05	4.51078e-05	9.87576e-05	2.7064e-05	0	8.27096e-05	3.92116e-05	0	0	0	0	0.000126296
900.595	H87 C48 N1 O12 P1	-0.70ppm	PCOx4 40:5	12059.3	0	64795.6	248808	117480	108801	117233	16498.7	0	0	0	0	77325.9	PCOx4 40:5	0	0.192166	0.75634	0.471942	0.362067	0.395155	0.0446632	0	0	0	0	0.262055	PCOx4 40:5	0	5.46704e-05	0.000171308	8.58944e-05	0.000130855	0.000114506	2.11134e-05	0	0	0	0	0.000117279
898.58	H85 C48 N1 O12 P1	-0.55ppm	PCOx4 40:6	0	45788	346418	619623	413539	192950	341519	279735	0	0	0	32928.5	354765	PCOx4 40:6	0.168184	1.02738	1.88356	1.66127	0.642093	1.15115	0.757263	0	0	0	0.149858	1.20229	PCOx4 40:6	5.01599e-05	0.000292286	0.000426619	0.000302354	0.000232059	0.000333575	0.000357977	0	0	0	5.52218e-05	0.000538066
896.564	H83 C48 N1 O12 P1	-1.01ppm	PCOx4 40:7	31677.2	30828.1	290193	657296	311737	188207	252493	213995	23894.2	23819	0	95348	304645	PCOx4 40:7	0.113235	0.860631	1.99808	1.25231	0.626312	0.851073	0.5793	0.0689654	0.25658	0	0.433931	1.03243	PCOx4 40:7	3.37716e-05	0.000244847	0.000452557	0.000227923	0.000226355	0.00024662	0.000273849	2.99622e-05	0.000124477	0	0.000159901	0.00046205
894.548	H81 C48 N1 O12 P1	-0.89ppm	PCOx4 40:8	0	32041.2	148259	236063	112294	74743.2	62035.6	89630.3	0	0	0	0	113560	PCOx4 40:8	0.11769	0.439695	0.717596	0.451108	0.248729	0.209102	0.242636	0	0	0	0	0.384849	PCOx4 40:8	3.51006e-05	0.000125092	0.000162532	8.21025e-05	8.98931e-05	6.05927e-05	0.0001147	0	0	0	0	0.000172234
																		0	0	0	0	0	0	0	0	0	0	0	0		0	0	0	0	0	0	0	0	0	0	0	0
																		0	0	0	0	0	0	0	0	0	0	0	0		0	0	0	0	0	0	0	0	0	0	0	0
###	PhosphatidylcholineOx5																	0	0	0	0	0	0	0	0	0	0	0	0		0	0	0	0	0	0	0	0	0	0	0	0
868.59	H87 C44 N1 O13 P1	-1.13ppm	PCOx5 36:1	0	1.15526e+06	2.26847e+06	2.14437e+06	2.76433e+06	1.61513e+06	1.12986e+06	1.76758e+06	1.49868e+06	343218	1418167	2.31673e+06	1.52541e+06	PCOx5 36:1	4.24338	6.72763	6.51858	11.1049	5.37481	3.80841	4.78496	4.32562	3.69716	5.99591	10.5435	5.16956	PCOx5 36:1	0.00126557	0.00191399	0.00147643	0.00202111	0.00194251	0.00110358	0.00226197	0.00187928	0.00179364	0.00317278	0.00388521	0.00231357
866.574	H85 C44 N1 O13 P1	-1.77ppm	PCOx5 36:2	0	214072	443460	519944	597818	205276	137891	345072	371278	0	0	0	188723	PCOx5 36:2	0.786309	1.31518	1.58055	2.40156	0.683114	0.464786	0.934137	1.07161	0	0	0	0.639577	PCOx5 36:2	0.000234513	0.000374164	0.000357988	0.000437088	0.000246884	0.000134684	0.000441589	0.000465564	0	0	0	0.000286234
864.559	H83 C44 N1 O13 P1	-0.32ppm	PCOx5 36:3	0	25513.4	123673	208458	183809	35114.9	35807.7	92061.9	16749.1	0	0	0	91188.2	PCOx5 36:3	0.0937132	0.36678	0.633683	0.7384	0.116855	0.120696	0.249218	0.0483427	0	0	0	0.309033	PCOx5 36:3	2.79495e-05	0.000104348	0.000143526	0.00013439	4.22324e-05	3.49748e-05	0.000117812	2.10026e-05	0	0	0	0.000138304
862.544	H81 C44 N1 O13 P1	-0.34ppm	PCOx5 36:4	0	0	228063	353443	105822	80976.1	147249	54621.9	0	0	0	0	121285	PCOx5 36:4	0	0.67637	1.07441	0.425108	0.269471	0.496331	0.147866	0	0	0	0	0.41103	PCOx5 36:4	0	0.000192425	0.00024335	7.73704e-05	9.73893e-05	0.000143824	6.98996e-05	0	0	0	0	0.000183951
892.59	H87 C46 N1 O13 P1	-1.25ppm	PCOx5 38:3	0	0	32553.2	39457.5	0	0	69914.6	29337	0	0	0	0	35760.4	PCOx5 38:3	0	0.0965436	0.119945	0	0	0.23566	0.0794174	0	0	0	0	0.121191	PCOx5 38:3	0	2.74663e-05	2.7167e-05	0	0	6.82884e-05	3.75425e-05	0	0	0	0	5.42372e-05
890.575	H85 C46 N1 O13 P1	0.03ppm	PCOx5 38:4	0	32120.3	235908	341486	292596	216730	239917	155784	0	0	0	0	218530	PCOx5 38:4	0.117981	0.699636	1.03807	1.17542	0.721228	0.808684	0.42172	0	0	0	0	0.740592	PCOx5 38:4	3.51872e-05	0.000199044	0.000235118	0.000213929	0.000260659	0.000234337	0.000199357	0	0	0	0	0.000331441
888.559	H83 C46 N1 O13 P1	-0.36ppm	PCOx5 38:5	0	48180.9	337277	725175	435182	259750	346471	213676	40001.1	0	0	80649.9	358928	PCOx5 38:5	0.176973	1.00027	2.20443	1.74822	0.864392	1.16785	0.578436	0.115455	0	0	0.367039	1.21639	PCOx5 38:5	5.27813e-05	0.000284573	0.000499293	0.000318179	0.0003124	0.000338413	0.000273441	5.01595e-05	0	0	0.000135252	0.00054438
886.544	H81 C46 N1 O13 P1	0.12ppm	PCOx5 38:6	0	57932.1	421480	621779	235047	81550	232775	114950	0	53789.1	0	0	181702	PCOx5 38:6	0.21279	1.24999	1.89012	0.944234	0.27138	0.784611	0.311177	0	0.57942	0	0	0.615781	PCOx5 38:6	6.34636e-05	0.000355618	0.000428103	0.000171852	9.80796e-05	0.000227361	0.000147101	0	0.0002811	0	0	0.000275584
884.529	H79 C46 N1 O13 P1	0.87ppm	PCOx5 38:7	0	0	145429	340527	0	66382	31518.9	59254.5	23981.8	0	0	0	110869	PCOx5 38:7	0	0.431302	1.03515	0	0.220905	0.10624	0.160406	0.0692183	0	0	0	0.375731	PCOx5 38:7	0	0.000122704	0.000234458	0	7.98371e-05	3.07858e-05	7.58279e-05	3.0072e-05	0	0	0	0.000168153
918.605	H89 C48 N1 O13 P1	-1.45ppm	PCOx5 40:4	13911.4	58899.8	36025.2	67999.2	0	75788.4	0	49764.7	65248	0	0	0	0	PCOx5 40:4	0.216345	0.106841	0.206708	0	0.252207	0	0.134717	0.188324	0	0	0	0	PCOx5 40:4	6.45237e-05	3.03958e-05	4.68184e-05	0	9.11501e-05	0	6.36838e-05	8.18179e-05	0	0	0	0
916.591	H87 C48 N1 O13 P1	0.27ppm	PCOx5 40:5	13650.2	19947.2	63791.2	185794	85914.5	98765.5	0	65301.8	0	0	0	91206.8	0	PCOx5 40:5	0.073268	0.189187	0.564788	0.345136	0.32867	0	0.176777	0	0	0	0.415084	0	PCOx5 40:5	2.18518e-05	5.3823e-05	0.000127922	6.28155e-05	0.000118785	0	8.35666e-05	0	0	0	0.000152956	0
914.575	H85 C48 N1 O13 P1	-0.16ppm	PCOx5 40:6	0	0	222099	333043	130603	113648	174636	160989	0	0	0	0	99983	PCOx5 40:6	0	0.658684	1.0124	0.52466	0.378196	0.588643	0.435808	0	0	0	0	0.338839	PCOx5 40:6	0	0.000187393	0.000229305	9.54891e-05	0.000136684	0.000170574	0.000206017	0	0	0	0	0.000151643
912.56	H83 C48 N1 O13 P1	-0.03ppm	PCOx5 40:7	0	0	89191.1	327762	199198	0	131061	107929	0	0	0	67305.3	307877	PCOx5 40:7	0	0.264516	0.996349	0.80022	0	0.441766	0.292172	0	0	0	0.306308	1.04338	PCOx5 40:7	0	7.52538e-05	0.000225669	0.000145642	0	0.000128013	0.000138117	0	0	0	0.000112872	0.000466952
910.545	H81 C48 N1 O13 P1	1.15ppm	PCOx5 40:8	0	14261.2	35149.4	117151	32496.7	0	25498.6	0	0	0	0	0	36278.6	PCOx5 40:8	0.0523828	0.104243	0.356123	0.130546	0	0.0859478	0	0	0	0	0	0.122947	PCOx5 40:8	1.56229e-05	2.96568e-05	8.06602e-05	2.37596e-05	0	2.49055e-05	0	0	0	0	0	5.50231e-05
[truncated: 39 more columns]

## Sheet: LPC
																	Normalization													Normalization against PC																Lipo 1			PDAC 1
###	LPCAc			Ctrl Mouse 1	Ctrl Mouse 2	Ctrl Mouse 3	Ctrl Mouse 4	Ctrl Mouse 5	Ctrl Mouse 6	Ctrl Mouse 7	Ctrl Mouse 8	Fento Mouse 1	Fento Mouse 2	Fento Mouse 3	Fento Mouse 4	PC in nmol	3352.95	3514.98	4415.1	5494.45	2766.94	3450.95	2115.4	2301.75	2061.26	1889.8	2713.75	2234.46		Ctrl Mouse 1	Ctrl Mouse 2	Ctrl Mouse 3	Ctrl Mouse 4	Ctrl Mouse 5	Ctrl Mouse 6	Ctrl Mouse 7	Ctrl Mouse 8	Fento Mouse 1	Fento Mouse 2	Fento Mouse 3	Fento Mouse 4					1	2	3	4
498.284	H45 C22 N1 O9 P1	0.23ppm	LPC 12:0	1.32863e+06	1.1581e+06	1.24783e+06	644571	989107	880892	1341105	1.44831e+06	878201	1.42315e+06	1.06884e+06	1.48065e+06		Ctrl Mouse 1	Ctrl Mouse 2	Ctrl Mouse 3	Ctrl Mouse 4	Ctrl Mouse 5	Ctrl Mouse 6	Ctrl Mouse 7	Ctrl Mouse 8	Fento Mouse 1	Fento Mouse 2	Fento Mouse 3	Fento Mouse 4																	LPC/PC	0.024744	0.033805	0.0246161	0.0472557
554.346	H53 C26 N1 O9 P1	-0.14ppm	LPC 16:0	1.93668e+06	1.40706e+06	4.96571e+06	2.06255e+06	2.16297e+06	3.54518e+06	3063824	4.40561e+06	3.78109e+06	3.35825e+06	3.71081e+06	3.9537e+06	LPC 16:0	43.7297	36.4491	119.384	95.9963	65.6038	120.736	68.5366	91.2573	129.165	70.7919	104.154	80.1071		0.0130421	0.0103696	0.02704	0.0174715	0.0237099	0.0349864	0.0323989	0.0396469	0.0626629	0.03746	0.0383802	0.0358508				LPCOx/PC	0.00188002	0.0028902	0.00233144	0.000375178
552.331	H51 C26 N1 O9 P1	0.29ppm	LPC 16:1	262192	278717	430433	505200	245882	248458	185385	141618	130022	201089	215326	245654	LPC 16:1	5.92022	7.22	10.3483	23.5133	7.45771	8.4616	4.14699	2.93347	4.44165	4.23895	6.04372	4.97728		0.00176567	0.00205407	0.00234385	0.00427947	0.00269529	0.00245196	0.00196038	0.00127445	0.00215482	0.00224307	0.00222707	0.00222751				Sum	0.026624	0.0366952	0.0269475	0.0476309
582.378	H57 C28 N1 O9 P1	0.15ppm	LPC 18:0	1.69012e+06	1.13983e+06	3.41931e+06	1.90732e+06	1.34851e+06	3.06028e+06	2.47475e+06	2.46455e+06	2.33364e+06	2.56954e+06	2.78776e+06	3.26979e+06	LPC 18:0	38.1625	29.5267	82.206	88.7716	40.9008	104.222	55.3592	51.0504	79.719	54.1658	78.2462	66.2502		0.0113818	0.00840025	0.0186193	0.0161566	0.014782	0.0302009	0.0261696	0.022179	0.0386748	0.0286622	0.0288332	0.0296493				%LPCOx	0.0706136	0.0787623	0.0865178	0.00787678
580.362	H55 C28 N1 O9 P1	0.11ppm	LPC 18:1	1.83017e+06	1.13518e+06	2.48583e+06	1.97087e+06	1.90247e+06	1.70809e+06	1.33754e+06	103247	1.21012e+06	1.43845e+06	1.68789e+06	1.76147e+06	LPC 18:1	41.3248	29.4062	59.7636	91.7296	57.7026	58.1714	29.9203	2.13865	41.3388	30.3225	47.3752	35.6897		0.0123249	0.00836597	0.0135362	0.016695	0.0208543	0.0168566	0.014144	0.00092914	0.0200551	0.0160453	0.0174575	0.0159724					1	1.1154	1.22523	1
578.346	H53 C28 N1 O9 P1	0.08ppm	LPC 18:2	342942	484573	531138	590883	352741	297673	244928	228603	161860	227708	302892	367284	LPC 18:2	7.74352	12.5526	12.7695	27.5012	10.6988	10.1377	5.47894	4.73525	5.52926	4.80008	8.50151	7.44165		0.00230946	0.00357117	0.00289223	0.00500528	0.00386664	0.00293764	0.00259003	0.00205724	0.00268246	0.00254	0.00313275	0.00333041					0	0.15756	0.293052	0
604.362	H55 C30 N1 O9 P1	0.27ppm	LPC 20:3	53232	79001.9	82145.7	158188	96261.2	99247.5	58500.3	25099.9	17115.5	51917.1	65585.2	87870.1	LPC 20:3	1.20196	2.0465	1.97492	7.36248	2.91964	3.38001	1.30863	0.519916	0.584678	1.09441	1.84083	1.78036		0.000358479	0.000582222	0.000447311	0.00133999	0.00105519	0.000979444	0.00061862	0.000225879	0.00028365	0.000579116	0.000678334	0.000796777
602.347	H53 C30 N1 O9 P1	0.41ppm	LPC 20:4	230548	359599	400219	553918	296517	258485	173569	150200	186577	216348	258695	299646	LPC 20:4	5.2057	9.3152	9.62194	25.7808	8.99347	8.80308	3.88267	3.11122	6.37362	4.5606	7.26098	6.07123		0.00155257	0.00265014	0.00217933	0.00469215	0.00325033	0.00255091	0.00183543	0.00135167	0.0030921	0.00241328	0.00267562	0.0027171
630.378	H57 C32 N1 O9 P1	0.36ppm	LPC 22:4	5605.9	40856.3	58206.1	100107	37773.7	47855.6	20137.8	0	11690.2	20695.1	35464.6	62561.6	LPC 22:4	0.12658	1.05836	1.39937	4.65926	1.14569	1.62979	0.450475	0	0.399346	0.436252	0.995413	1.26758		3.77517e-05	0.000301099	0.000316952	0.000847994	0.000414064	0.000472273	0.00021295	0	0.000193738	0.000230846	0.000366803	0.000567288				FC LPC/PC	1	1.36619	0.994828	1
628.362	H55 C32 N1 O9 P1	0.34ppm	LPC 22:5	39263.3	50780.4	40076.6	66340.9	30041.1	41004.4	17484.4	41858.1	25811	38084.7	46377.9	51707.8	LPC 22:5	0.886554	1.31544	0.963509	3.08768	0.911158	1.39646	0.391119	0.867043	0.881723	0.802825	1.30172	1.04767		0.00026441	0.000374237	0.000218231	0.000561963	0.000329302	0.00040466	0.000184891	0.000376689	0.000427759	0.00042482	0.000479677	0.000468869				Log2 FC (LPC/PC)	0	0.450158	-0.00748042	0
626.346	H53 C32 N1 O9 P1	-0.10ppm	LPC 22:6	177885	313581	248381	371505	159945	133906	113844	131890	114615	124227	174838	156248	LPC 22:6	4.0166	8.12312	5.9715	17.2908	4.85121	4.56036	2.54664	2.73195	3.91533	2.6187	4.90733	3.16579		0.00119793	0.002311	0.00135252	0.00314696	0.00175327	0.00132148	0.00120386	0.0011869	0.00189948	0.00138571	0.00180832	0.00141681
[truncated: 38 more columns]

## Sheet: PE and PEOx
precursorexpmz$A	sumcomposition	precursorppmdev$A	name	intensity:E8_Sebastian_10_00.mzML	intensity:E8_Sebastian_10_31.mzML	intensity:E8_Sebastian_10_32.mzML	intensity:E8_Sebastian_10_33.mzML	intensity:E8_Sebastian_10_34.mzML	intensity:E8_Sebastian_10_35.mzML	intensity:E8_Sebastian_10_36.mzML	intensity:E8_Sebastian_10_37.mzML	intensity:E8_Sebastian_10_38.mzML	intensity:E8_Sebastian_10_39.mzML	intensity:E8_Sebastian_10_40.mzML	intensity:E8_Sebastian_10_41.mzML	intensity:E8_Sebastian_10_42.mzML		name	intensity:E8_Sebastian_10_31.mzML	intensity:E8_Sebastian_10_32.mzML	intensity:E8_Sebastian_10_33.mzML	intensity:E8_Sebastian_10_34.mzML	intensity:E8_Sebastian_10_35.mzML	intensity:E8_Sebastian_10_36.mzML	intensity:E8_Sebastian_10_37.mzML	intensity:E8_Sebastian_10_38.mzML	intensity:E8_Sebastian_10_39.mzML	intensity:E8_Sebastian_10_40.mzML	intensity:E8_Sebastian_10_41.mzML	intensity:E8_Sebastian_10_42.mzML
																			Quantification
###	Phosphatidylethanolamine				Ctrl Mouse 1	Ctrl Mouse 2	Ctrl Mouse 3	Ctrl Mouse 4	Ctrl Mouse 5	Ctrl Mouse 6	Ctrl Mouse 7	Ctrl Mouse 8	Fento Mouse 1	Fento Mouse 2	Fento Mouse 3	Fento Mouse 4		PE in nmol	802.693	707.687	787.728	747.164	758.898	714.939	536.395	598.023	401.018	389.152	688.737	510.922		Normalization
720.554	H79 C39 N1 O8 P1	0.15ppm	PE 34:0	5.49201e+06	2.73102e+06	3933286	4.30309e+06	4.72841e+06	2.94226e+06	3.58682e+06	3.58036e+06	3.26094e+06	1.15231e+06	2.65794e+06	2.56143e+06	3.33288e+06			Ctrl Mouse 1	Ctrl Mouse 2	Ctrl Mouse 3	Ctrl Mouse 4	Ctrl Mouse 5	Ctrl Mouse 6	Ctrl Mouse 7	Ctrl Mouse 8	Fento Mouse 1	Fento Mouse 2	Fento Mouse 3	Fento Mouse 4		Ctrl Mouse 1	Ctrl Mouse 2	Ctrl Mouse 3	Ctrl Mouse 4	Ctrl Mouse 5	Ctrl Mouse 6	Ctrl Mouse 7	Ctrl Mouse 8	Fento Mouse 1	Fento Mouse 2	Fento Mouse 3	Fento Mouse 4
692.523	H75 C37 N1 O8 P1	0.17ppm	PE 32:0	160938	213727	335106	408698	495079	235062	395289	326468	184355	0	0	85274	378819		PE 32:0	3.91295	4.25987	4.74888	5.23516	3.99458	5.51029	4.55916	2.82672	0	0	1.66458	5.68305		0.00487478	0.00601943	0.00602858	0.0070067	0.00526365	0.00770735	0.00849963	0.00472678	0	0	0.00241686	0.0111231
690.507	H73 C37 N1 O8 P1	-0.26ppm	PE 32:1	0	138883	177194	292025	378860	156692	256323	177649	152514	0	0	0	105068		PE 32:1	2.5427	2.25249	3.3932	4.00621	2.66278	3.57312	2.48088	2.33849	0	0	0	1.57623		0.00316771	0.00318289	0.00430758	0.00536189	0.00350875	0.00499779	0.00462511	0.00391037	0	0	0	0.00308508
718.538	H77 C39 N1 O8 P1	0.15ppm	PE 34:1	0	3.18406e+06	2.78075e+06	3.41827e+06	3.35927e+06	2.04413e+06	3.45727e+06	1.96294e+06	2.50956e+06	900988	1.50585e+06	2.36085e+06	1.73974e+06		PE 34:1	58.2944	35.349	39.7188	35.5222	34.7373	48.1941	27.4126	38.4791	39.095	28.3274	46.0845	26.0997		0.0726235	0.04995	0.050422	0.0475427	0.0457734	0.06741	0.0511053	0.0643439	0.0974894	0.0727925	0.0669117	0.0510834
746.57	H81 C41 N1 O8 P1	0.24ppm	PE 36:1	0	7.18461e+06	7194864	1.02606e+07	1.05464e+07	5.89381e+06	7.99236e+06	5.96412e+06	5.92612e+06	2.02064e+06	4.05074e+06	5.78882e+06	5.04608e+06		PE 36:1	131.537	91.4612	119.224	111.522	100.158	111.413	83.2895	90.8653	87.6779	76.2007	113	75.7014		0.16387	0.12924	0.151351	0.149261	0.131978	0.155835	0.155276	0.151943	0.218639	0.195812	0.164068	0.148166
774.601	H85 C43 N1 O8 P1	-0.02ppm	PE 38:1	0	5.21537e+06	4.70639e+06	5.21283e+06	5.32272e+06	3.52303e+06	4.8832e+06	2844282	4.00761e+06	686394	2.30548e+06	3.52592e+06	1.16977e+06		PE 38:1	95.4839	59.8277	60.5708	56.2845	59.8695	68.0713	39.7206	61.4487	29.7835	43.3696	68.8271	17.549		0.118954	0.0845398	0.076893	0.0753308	0.07889	0.0952127	0.0740511	0.102753	0.0742697	0.111446	0.0999324	0.0343477
802.632	H89 C45 N1 O8 P1	-0.06ppm	PE 40:1	0	897302	923423	923561	1.03236e+06	764830	1.05656e+06	633075	738098	0	347987	560407	525323		PE 40:1	16.4279	11.7386	10.7314	10.9166	12.9973	14.7283	8.84095	11.3173	0	6.54618	10.9393	7.8809		0.020466	0.0165872	0.0136232	0.0146106	0.0171266	0.0206008	0.0164822	0.0189245	0	0.0168216	0.0158832	0.0154249
830.663	H93 C47 N1 O8 P1	0.02ppm	PE 42:1	0	1.00741e+06	182506	118916	-1.8	37502.5	498161	63511.1	515858	0	0	124418	0		PE 42:1	18.4438	2.32002	1.38175	-1.90339e-05	0.637307	6.94432	0.886938	7.90965	0	0	2.42867	0		0.0229775	0.00327831	0.0017541	-2.54748e-08	0.00083978	0.00971316	0.00165352	0.0132263	0	0	0.00352627	0
744.554	H79 C41 N1 O8 P1	0.25ppm	PE 36:2	0	5.24522e+06	5.797e+06	7.51666e+06	7.32704e+06	4.87774e+06	6.61661e+06	4.57559e+06	4.34502e+06	1.35634e+06	3.48197e+06	4.83347e+06	4.65405e+06		PE 36:2	96.0304	73.6916	87.3402	77.4789	82.891	92.2349	63.8985	66.6223	58.8534	65.5013	94.351	69.8202		0.119635	0.10413	0.110876	0.103697	0.109226	0.129011	0.119126	0.111404	0.14676	0.168318	0.136991	0.136655
772.585	H83 C43 N1 O8 P1	-0.11ppm	PE 38:2	0	2.10316e+06	3406959	4.1243e+06	3.66227e+06	2.12814e+06	2.53359e+06	2288019	2.04065e+06	369067	957022	1.84582e+06	1.91758e+06		PE 38:2	38.5051	43.3093	47.9225	38.7263	36.165	35.318	31.9524	31.2894	16.0143	18.0031	36.0311	28.7676		0.0479699	0.0611984	0.0608363	0.051831	0.0476546	0.0494	0.0595688	0.0523214	0.039934	0.0462623	0.0523148	0.0563052
800.616	H87 C45 N1 O8 P1	-0.30ppm	PE 40:2	0	810824	1.29372e+06	1.44562e+06	1.56235e+06	916984	1.13079e+06	932208	776368	0	188944	570100	729437		PE 40:2	14.8447	16.4458	16.7975	16.5209	15.583	15.7631	13.0184	11.9041	0	3.55434	11.1285	10.943		0.0184936	0.0232388	0.021324	0.0221115	0.0205337	0.0220482	0.0242701	0.0199057	0	0.00913354	0.0161579	0.0214182
828.648	H91 C47 N1 O8 P1	0.66ppm	PE 42:2	0	486280	650736	911455	1.10773e+06	785751	679462	466810	297031	187119	149237	576357	694241		PE 42:2	8.90288	8.27217	10.5907	11.7135	13.3528	9.47163	6.51904	4.55438	8.11933	2.80738	11.2507	10.415		0.0110913	0.011689	0.0134446	0.0156773	0.017595	0.0132482	0.0121534	0.00761574	0.0202468	0.00721409	0.0163353	0.0203847
716.523	H75 C39 N1 O8 P1	0.30ppm	PE 34:2	0	776217	1.19733e+06	1.41875e+06	1.58331e+06	853673	1.17247e+06	953624	765219	89598.7	214051	779499	920959		PE 34:2	14.2111	15.2205	16.4853	16.7425	14.5071	16.3441	13.3174	11.7331	3.88779	4.02664	15.2161	13.8163		0.0177043	0.0215073	0.0209276	0.0224081	0.019116	0.0228609	0.0248277	0.0196198	0.00969482	0.0103472	0.0220928	0.0270418
768.554	H79 C43 N1 O8 P1	-0.27ppm	PE 38:4	0	5.21128e+06	8.02427e+06	1.03684e+07	1.10263e+07	5.44019e+06	7.34854e+06	5.79882e+06	5.05107e+06	1.7454e+06	3.42411e+06	4682835	5601067		PE 38:4	95.409	102.005	120.477	116.597	92.4491	102.438	80.9809	77.4482	75.7349	64.4128	91.4106	84.0273
766.538	H77 C43 N1 O8 P1	-0.08ppm	PE 38:5	0	1.31518e+06	1.54685e+06	2.21235e+06	2.30279e+06	942257	1.41312e+06	1.03831e+06	1.20639e+06	104729	487793	869027	832624		PE 38:5	24.0786	19.6636	25.7065	24.3506	16.0125	19.6988	14.5001	18.4976	4.54431	9.17614	16.9637	12.4911		0.0299972	0.0277857	0.0326337	0.0325907	0.0210996	0.0275531	0.0270325	0.0309313	0.0113319	0.0235798	0.0246302	0.024448
764.522	H75 C43 N1 O8 P1	-0.17ppm	PE 38:6	0	1.35833e+06	2.40989e+06	2.30548e+06	2.45396e+06	953418	1.28029e+06	1.1735e+06	1.32199e+06	50082.7	389857	1.10476e+06	958576		PE 38:6	24.8685	30.6345	26.7887	25.9491	16.2021	17.8471	16.388	20.27	2.17315	7.33382	21.5653	14.3806		0.0309813	0.0432882	0.0340075	0.0347302	0.0213495	0.024963	0.0305522	0.0338951	0.00541908	0.0188456	0.0313115	0.0281463
742.538	H77 C41 N1 O8 P1	-0.18ppm	PE 36:3	276776	986959	1.26939e+06	1.67969e+06	1.60262e+06	1.8253e+06	1.33448e+06	913552	956734	113516	224759	989118	955059		PE 36:3	18.0694	16.1365	19.5172	16.9467	31.0186	18.6025	12.7578	14.6696	4.92557	4.22807	19.3079	14.3278		0.022511	0.0228018	0.0247766	0.0226814	0.0408733	0.0260196	0.0237844	0.0245302	0.0122827	0.0108648	0.0280338	0.028043
714.507	H73 C39 N1 O8 P1	0.01ppm	PE 34:3	0	21035	57607.2	137609	88938.4	44205.6	45286.3	60403.6	0	47043.4	0	0	31991		PE 34:3	0.385112	0.732304	1.59895	0.940469	0.751218	0.631287	0.843541	0	2.04127	0	0	0.47993		0.000479775	0.00103479	0.00202983	0.00125872	0.00098988	0.000882993	0.00157261	0	0.00509022	0	0	0.00093934
794.569	H81 C45 N1 O8 P1	-0.03ppm	PE 40:5	78190.4	1.04334e+06	1.7792e+06	1.9155e+06	2.0258e+06	940204	1.26e+06	1.0148e+06	900708	216251	407860	920762	1.00248e+06		PE 40:5	19.1016	22.6172	22.2572	21.4216	15.9776	17.5643	14.1717	13.8106	9.38339	7.67248	17.9736	15.0392		0.0237969	0.0319594	0.0282549	0.0286705	0.0210537	0.0245675	0.0264203	0.0230937	0.023399	0.0197159	0.0260965	0.0294355
792.553	H79 C45 N1 O8 P1	-0.44ppm	PE 40:6	422424	2.94113e+06	5.84037e+06	6.11179e+06	7.01116e+06	8.70986e+06	3.44313e+06	3.22638e+06	3.86993e+06	854648	1.74343e+06	2.89866e+06	2.9139e+06		PE 40:6	53.8468	74.2428	71.0163	74.1387	148.013	47.9969	45.0567	59.3377	37.0842	32.7967	56.5829	43.7144		0.0670826	0.104909	0.0901533	0.0992267	0.195037	0.0671342	0.0839992	0.0992231	0.0924752	0.0842773	0.0821546	0.0855598
790.538	H77 C45 N1 O8 P1	-0.42ppm	PE 40:7	11805.7	694345	1.17907e+06	1357413	1.62028e+06	568947	627275	715600	686776	0	56378.4	318058	514884		PE 40:7	12.7122	14.9884	15.7725	17.1334	9.66852	8.74415	9.99341	10.5303	0	1.06057	6.2086	7.7243		0.0158369	0.0211794	0.0200228	0.0229313	0.0127402	0.0122306	0.0186307	0.0176086	0	0.00272532	0.00901447	0.0151183
788.522	H75 C45 N1 O8 P1	-0.34ppm	PE 40:8	0	125808	363366	313203	446712	0	69375.7	87846.8	149604	0	0	0	49192.5		PE 40:8	2.30331	4.61912	3.63928	4.72371	0	0.967091	1.22679	2.29388	0	0	0	0.737987		0.00286948	0.00652706	0.00461997	0.00632218	0	0.00135269	0.0022871	0.00383578	0	0	0	0.00144442
740.522	H75 C41 N1 O8 P1	-0.05ppm	PE 36:4	0	965268	1.61156e+06	1.87157e+06	2.08243e+06	1.04162e+06	1.28828e+06	1.02936e+06	956019	300672	399763	960713	1.14795e+06		PE 36:4	17.6723	20.4862	21.7468	22.0204	17.7009	17.9585	14.3751	14.6587	13.0465	7.52017	18.7535	17.2216		0.0220162	0.0289481	0.027607	0.029472	0.0233245	0.0251189	0.0267995	0.0245119	0.0325336	0.0193245	0.0272288	0.0337068
770.569	H81 C43 N1 O8 P1	-0.22ppm	PE 38:3	0	1042027	1569692	2.08409e+06	2100644	1.18051e+06	1.44112e+06	1.26179e+06	943167	199425	351649	1.07829e+06	1.26684e+06		PE 38:3	19.0776	19.954	24.2162	22.213	20.0613	20.089	17.621	14.4616	8.65328	6.61507	21.0487	19.0051		0.023767	0.028196	0.0307418	0.0297298	0.0264348	0.0280989	0.0328509	0.0241823	0.0215783	0.0169986	0.0305613	0.0371977
826.632	H89 C47 N1 O8 P1	0.00ppm	PE 42:3	0	217746	316414	357324	367027	115683	293922	259131	114886	0	0	0	262862		PE 42:3	3.98654	4.02227	4.15194	3.88108	1.96588	4.09724	3.61878	1.76156	0	0	0	3.94347		0.00496645	0.00568368	0.00527078	0.00519442	0.00259045	0.00573089	0.00674649	0.00294563	0	0	0	0.00771833
824.616	H87 C47 N1 O8 P1	0.12ppm	PE 42:4	0	657918	1.05703e+06	1.02715e+06	1.15183e+06	677999	770358	641918	586612	0	0	409845	638395		PE 42:4	12.0453	13.437	11.935	12.1799	11.5217	10.7387	8.96444	8.99453	0	0	8.00033	9.57721		0.0150061	0.0189872	0.0151511	0.0163015	0.0151822	0.0150205	0.0167124	0.0150404	0	0	0.0116159	0.0187449
###	PhosphatidylethanolamineOx																		0	0	0	0	0	0	0	0	0	0	0	0		0	0	0	0	0	0	0	0	0	0	0	0
820.642	H91 C45 N1 O9 P1	-0.62ppm	PEOx 40:0	0	784681	1.1174e+06	1.09537e+06	1.52472e+06	1.77821e+06	956832	966949	212235	0	347603	486709	1.20347e+06		PEOx 40:0	14.3661	14.2044	12.7277	16.123	30.2183	13.3382	13.5035	3.2542	0	6.53896	9.50072	18.0545		0.0178973	0.0200716	0.0161574	0.0215789	0.0398187	0.0186563	0.0251746	0.0054416	0	0.0168031	0.0137944	0.0353371
790.596	H85 C43 N1 O9 P1	0.62ppm	PEOx 38:1	0	0	88053.9	0	44565.3	34763.7	0	26451.2	0	126616	0	0	0		PEOx 38:1	0	1.11934	0	0.471251	0.590765	0	0.369393	0	5.49404	0	0	0		0	0.00158169	0	0.000630719	0.000778451	0	0.000688659	0	0.0137002	0	0	0
818.627	H89 C45 N1 O9 P1	-0.47ppm	PEOx 40:1	0	171883	413358	137012	307574	215716	230324	97560.3	0	132536	134345	77846.9	188789		PEOx 40:1	3.14686	5.25461	1.59202	3.25241	3.66582	3.2107	1.36244	0	5.7509	2.52724	1.5196	2.83222		0.00392038	0.00742505	0.00202102	0.004353	0.00483045	0.00449087	0.00253999	0	0.0143408	0.00649423	0.00220636	0.00554335
846.659	H93 C47 N1 O9 P1	0.40ppm	PEOx 42:1	0	164153	165685	184999	286094	122394	122596	154800	0	0	0	0	0		PEOx 42:1	3.00534	2.1062	2.1496	3.02527	2.07992	1.70898	2.16179	0	0	0	0	0		0.00374407	0.00297617	0.00272886	0.00404901	0.00274072	0.00239039	0.00403022	0	0	0	0	0
788.58	H83 C43 N1 O9 P1	0.36ppm	PEOx 38:2	0	2.93952e+06	1.30798e+06	1.04035e+06	843503	1452116	1.98881e+06	1.07666e+06	2.27342e+06	398362	862715	1.94567e+06	600803		PEOx 38:2	53.8173	16.6271	12.0884	8.91953	24.6769	27.7238	15.0357	34.8584	17.2854	16.229	37.9802	9.01326		0.0670459	0.023495	0.0153459	0.0119378	0.0325167	0.0387779	0.028031	0.0582894	0.0431038	0.0417035	0.0551448	0.0176412
816.611	H87 C45 N1 O9 P1	-0.84ppm	PEOx 40:2	0	116400	48439.3	76401.6	86233.6	164993	59511	71534.7	0	182139	0	0	35632.1		PEOx 40:2	2.13107	0.615761	0.887753	0.911867	2.80385	0.829578	0.998988	0	7.90325	0	0	0.534554		0.0026549	0.000870104	0.00112698	0.00122044	0.00369463	0.00116035	0.00186241	0	0.019708	0	0	0.00104625
844.644	H91 C47 N1 O9 P1	1.88ppm	PEOx 42:2	0	83632.8	387123	323461	616191	447102	250446	341512	0	0	0	192854	919967		PEOx 42:2	1.53116	4.92111	3.75847	6.51584	7.59794	3.49119	4.76924	0	0	0	3.76458	13.8014		0.00190753	0.0069538	0.00477128	0.00872076	0.0100118	0.0048832	0.00889129	0	0	0	0.00546592	0.0270126
756.518	H75 C41 N1 O9 P1	0.57ppm	PEOx 36:4	0	76234.5	220426	375327	294881	333027	357871	156066	22872	0	0	81396.6	360332		PEOx 36:4	1.39571	2.80206	4.36114	3.11818	5.65937	4.98869	2.17947	0.350697	0	0	1.58889	5.40571		0.00173879	0.00395947	0.00553635	0.00417336	0.00745735	0.00697778	0.00406318	0.000586427	0	0	0.00230696	0.0105803
754.501	H73 C41 N1 O9 P1	-0.35ppm	PEOx 36:5	0	0	61373.6	104026	41592.1	45999.5	82749.8	37567.9	0	0	0	0	72931.3		PEOx 36:5	0	0.780182	1.20873	0.439811	0.781703	1.15352	0.524639	0	0	0	0	1.09412		0	0.00110244	0.00153445	0.00058864	0.00103005	0.00161346	0.000978083	0	0	0	0	0.00214145
698.438	H65 C37 N1 O9 P1	-0.86ppm	PEOx 32:5	0	10918.7	16482.6	58475.8	30456.5	0	0	20909	0	0	0	0	0		PEOx 32:5	0.199901	0.209527	0.679463	0.322059	0	0	0.291996	0	0	0	0	0		0.000249038	0.000296073	0.00086256	0.000431041	0	0	0.000544368	0	0	0	0	0
760.549	H79 C41 N1 O9 P1	0.92ppm	PEOx 36:2	0	0	0	0	0	925657	0	0	1.12261e+06	531576	626027	470780	204535		PEOx 36:2	0	0	0	0	15.7304	0	0	17.2129	23.0657	11.7765	9.18978	3.06844		0	0	0	0	0.0207279	0	0	0.0287831	0.0575179	0.030262	0.013343	0.0060057
786.565	H81 C43 N1 O9 P1	0.27ppm	PEOx 38:3	10397.7	4.54638e+06	1.5808e+06	1.16786e+06	874347	894278	2.56141e+06	1.34986e+06	2.88418e+06	706934	2.04811e+06	2.46722e+06	284572		PEOx 38:3	83.2359	20.0952	13.57	9.24569	15.1971	35.7058	18.851	44.2231	30.6747	38.5281	48.1611	4.26916		0.103696	0.0283956	0.0172268	0.0123744	0.0200252	0.0499424	0.0351438	0.0739489	0.0764921	0.0990052	0.0699267	0.0083558
784.549	H79 C43 N1 O9 P1	0.20ppm	PEOx 38:4	22747.8	897163	1.01827e+06	1.07112e+06	1.26712e+06	112376	1.07098e+06	793440	646302	157585	460750	764347	907618		PEOx 38:4	16.4254	12.9442	12.4459	13.3991	1.90969	14.9293	11.0805	9.90976	6.8378	8.66742	14.9203	13.6161		0.0204629	0.0182909	0.0157998	0.0179332	0.0025164	0.0208819	0.0206573	0.0165709	0.0170511	0.0222726	0.0216633	0.02665
782.534	H77 C43 N1 O9 P1	0.53ppm	PEOx 38:5	0	1.07569e+06	1.40252e+06	1.57142e+06	1.75467e+06	980586	1.31441e+06	1514476	835296	276372	474320	983621	1.55076e+06		PEOx 38:5	19.694	17.8288	18.2592	18.5546	16.6638	18.3228	21.1498	12.8076	11.9921	8.92269	19.2006	23.2645		0.0245349	0.0251931	0.0231796	0.0248333	0.0219579	0.0256285	0.0394295	0.0214166	0.0299042	0.0229285	0.0278781	0.0455344
780.517	H75 C43 N1 O9 P1	-0.43ppm	PEOx 38:6	0	90213.2	361627	419025	362109	232150	240706	238088	155303	0	0	74793	324865		PEOx 38:6	1.65164	4.59701	4.86889	3.82908	3.94509	3.35541	3.32492	2.38126	0	0	1.45999	4.87363		0.00205762	0.00649583	0.00618092	0.00512481	0.00519845	0.00469328	0.00619864	0.00398189	0	0	0.0021198	0.00953888
778.501	H73 C43 N1 O9 P1	-0.60ppm	PEOx 38:7	0	0	28720.3	164645	77090.7	0	0	58979.2	0	0	0	0	36071.3		PEOx 38:7	0	0.365093	1.91311	0.815187	0	0	0.82365	0	0	0	0	0.541142		0	0.000515896	0.00242864	0.00109104	0	0	0.00153553	0	0	0	0	0.00105915
700.455	H67 C37 N1 O9 P1	-0.14ppm	PEOx 32:4	0	42377	210206	332883	165180	115542	135749	167114	36048.6	0	0	0	105228		PEOx 32:4	0.775845	2.67214	3.86796	1.74668	1.96348	1.89233	2.33376	0.552734	0	0	0	1.57863		0.000966552	0.00377588	0.00491027	0.00233775	0.00258728	0.00264684	0.00435082	0.000924269	0	0	0	0.00308977
730.502	H73 C39 N1 O9 P1	0.00ppm	PEOx 34:3	0	0	36417	91328.7	25406.1	32503.7	30308.7	20076.9	0	0	0	0	22342.3		PEOx 34:3	0	0.462934	1.0612	0.268654	0.552359	0.4225	0.280376	0	0	0	0	0.33518		0	0.00065415	0.00134716	0.000359565	0.000727844	0.00059096	0.000522704	0	0	0	0	0.000656029
758.533	H77 C41 N1 O9 P1	0.46ppm	PEOx 36:3	0	0	0	0	0	910159	300841	0	0	40977.3	0	151018	475005		PEOx 36:3	0	0	0	0	15.467	4.1937	0	0	1.77805	0	2.94792	7.12604		0	0	0	0	0.0203809	0.0058658	0	0	0.00443385	0	0.00428019	0.0139474
814.595	H85 C45 N1 O9 P1	-0.27ppm	PEOx 40:3	0	61011.5	75838.2	114332	198238	159654	108818	5533.5	52045.7	0	0	0	33048.7		PEOx 40:3	1.11701	0.964057	1.32848	2.09625	2.71311	1.51691	0.0772758	0.798017	0	0	0	0.495797		0.00139158	0.00136226	0.00168647	0.00280561	0.00357507	0.00212173	0.000144065	0.00133443	0	0	0	0.000970397
812.58	H83 C45 N1 O9 P1	0.03ppm	PEOx 40:4	0	404218	797278	735196	884608	757680	575095	641281	308302	140218	79314.7	392863	828300		PEOx 40:4	7.40049	10.135	8.54266	9.35419	12.8758	8.01678	8.95555	4.7272	6.0842	1.49203	7.66883	12.4262		0.00921958	0.0143213	0.0108447	0.0125196	0.0169664	0.0112132	0.0166958	0.00790472	0.0151719	0.00383406	0.0111346	0.0243211
810.565	H81 C45 N1 O9 P1	0.30ppm	PEOx 40:5	0	1.11606e+06	1.60726e+06	1.77941e+06	308866	809864	1.35406e+06	1.59733e+06	802676	520384	706996	1287835	1.64743e+06		PEOx 40:5	20.433	20.4315	20.6759	3.26607	13.7626	18.8754	22.3069	12.3074	22.5801	13.2997	25.139	24.7148		0.0254555	0.0288709	0.0262476	0.00437129	0.018135	0.0264014	0.0415867	0.0205802	0.0563069	0.0341761	0.0365002	0.0483729
808.548	H79 C45 N1 O9 P1	-0.24ppm	PEOx 40:6	0	943144	973523	1108518	1.30011e+06	803776	842903	973181	998341	49304.5	310567	717662	888779		PEOx 40:6	17.2672	12.3754	12.8805	13.7478	13.6592	11.75	13.5906	15.3076	2.13938	5.84225	14.009	13.3335		0.0215116	0.0174872	0.0163514	0.0184	0.0179987	0.0164349	0.0253369	0.025597	0.00533488	0.0150127	0.0203402	0.0260969
806.533	H77 C45 N1 O9 P1	-0.15ppm	PEOx 40:7	0	552590	978072	960838	993694	311346	633190	743154	635685	0	64516.9	261350	814230		PEOx 40:7	10.1169	12.4333	11.1645	10.5077	5.29093	8.82661	10.3782	9.74696	0	1.21366	5.10164	12.2151		0.0126037	0.0175689	0.014173	0.0140634	0.00697186	0.0123459	0.0193481	0.0162986	0	0.00311874	0.00740725	0.0239079
728.486	H71 C39 N1 O9 P1	-0.07ppm	PEOx 34:4	0	36085.1	185135	280526	60579.2	57080.6	174440	82501.2	0	0	0	0	112091		PEOx 34:4	0.660652	2.35344	3.25959	0.640588	0.970012	2.43168	1.15214	0	0	0	0	1.6816		0.000823044	0.00332554	0.00413796	0.000857359	0.00127819	0.00340124	0.00214793	0	0	0	0	0.0032913
702.471	H69 C37 N1 O9 P1	0.04ppm	PEOx 32:3	0	0	50179.5	127518	44644.4	74267.2	62155	71069.5	0	0	0	0	48369.5		PEOx 32:3	0	0.637883	1.48171	0.472087	1.26208	0.866435	0.992492	0	0	0	0	0.72564		0	0.000901363	0.00188099	0.000631838	0.00166304	0.0012119	0.0018503	0	0	0	0	0.00142026
842.627	H89 C47 N1 O9 P1	-0.40ppm	PEOx 42:3	0	664810	723553	814033	1.48898e+06	180084	703235	103349	111712	65845.9	174897	431697	1.13196e+06		PEOx 42:3	12.1714	9.19782	9.4587	15.7451	3.06029	9.80303	1.44327	1.71289	2.85713	3.29009	8.42687	16.9816		0.0151633	0.012997	0.0120076	0.0210731	0.00403254	0.0137117	0.00269069	0.00286425	0.0071247	0.00845449	0.0122353	0.0332372
840.611	H87 C47 N1 O9 P1	-0.21ppm	PEOx 42:4	0	76577.3	112868	76187.5	175645	239789	8616.5	83518.4	0	0	0	0	172701		PEOx 42:4	1.40199	1.43477	0.885265	1.85734	4.07491	0.120113	1.16634	0	0	0	0	2.59086		0.00174661	0.00202742	0.00112382	0.00248585	0.00536951	0.000168005	0.00217441	0	0	0	0	0.00507095
838.594	H85 C47 N1 O9 P1	-1.74ppm	PEOx 42:5	281220	28605.6	313573	232675	393219	360314	255294	337476	503918	0	57175.1	157228	227886		PEOx 42:5	0.523716	3.98615	2.70358	4.15805	6.12307	3.55877	4.71288	7.72657	0	1.07555	3.06914	3.41875		0.000652449	0.00563265	0.00343212	0.00556511	0.00806837	0.00497772	0.00878621	0.0129202	0	0.00276383	0.00445619	0.00669133
836.579	H83 C47 N1 O9 P1	-0.84ppm	PEOx 42:6	0	392481	436100	345721	428270	338351	366868	367416	300282	80335.1	84279.6	-1.8	350545		PEOx 42:6	7.1856	5.54371	4.01712	4.52869	5.74985	5.1141	5.131	4.60422	3.48584	1.58543	-3.51366e-05	5.25889		0.00895187	0.00783356	0.00509963	0.00606117	0.00757658	0.00715319	0.00956571	0.00769908	0.00869248	0.00407406	-5.10161e-08	0.0102929
834.564	H81 C47 N1 O9 P1	-0.21ppm	PEOx 42:7	0	557384	674420	547507	855771	438466	537775	465427	439759	181076	142671	485052	523995		PEOx 42:7	10.2047	8.57323	6.36179	9.04925	7.45117	7.49653	6.49972	6.74283	7.85712	2.68386	9.46838	7.86099		0.012713	0.0121144	0.00807613	0.0121115	0.00981841	0.0104855	0.0121174	0.0112752	0.019593	0.00689669	0.0137475	0.0153859
832.547	H79 C47 N1 O9 P1	-1.58ppm	PEOx 42:8	0	103867	224321	302900	413702	135685	152026	394046	438958	0	127433	214963	146404		PEOx 42:8	1.90161	2.85158	3.51957	4.37464	2.3058	2.11923	5.50289	6.73054	0	2.39721	4.19615	2.19636		0.00236904	0.00402943	0.004468	0.00585499	0.00303835	0.00296421	0.010259	0.0112547	0	0.00616007	0.00609254	0.00429882
###	PhosphatidylethanolamineOx2
780.575	H83 C41 N1 O10 P1	0.14ppm	PEOx2 36:0	0	343959	766661	769814	393361	516048	279580	666054	666083	0	59907.3	200860	550006		PEOx2 36:0	6.29725	9.74581	8.9449	4.15955	8.76958	3.89732	9.30149	10.2131	0	1.12695	3.92085	8.2512		0.00784516	0.0137714	0.0113553	0.00556712	0.0115557	0.00545126	0.0173408	0.017078	0	0.00289591	0.00569282	0.0161496
806.59	H85 C43 N1 O10 P1	-0.33ppm	PEOx2 38:1	0	0	0	0	0	4241	78962.8	212672	146372	116320	234526	223456	381467		PEOx2 38:1	0	0	0	0	0.0720704	1.10073	2.96999	2.24432	5.04726	4.4118	4.36195	5.72277		0	0	0	0	9.49672e-05	0.00153962	0.00553695	0.00375291	0.0125861	0.0113369	0.00633326	0.0112009
804.576	H83 C43 N1 O10 P1	0.76ppm	PEOx2 38:2	0	688191	771713	1.00368e+06	1.29868e+06	666084	721876	730017	529961	278905	237308	691835	951222		PEOx2 38:2	12.5995	9.81003	11.6623	13.7327	11.3193	10.0629	10.1947	8.1259	12.102	4.46413	13.5049	14.2702		0.0156965	0.0138621	0.014805	0.0183798	0.0149154	0.0140751	0.019006	0.0135879	0.0301783	0.0114714	0.0196082	0.0279304
860.638	H91 C47 N1 O10 P1	0.02ppm	PEOx2 42:2	43098.1	167359	81667	64843.6	194241	116178	105819	61989	0	0	0	0	120280		PEOx2 42:2	3.06403	1.03815	0.753454	2.05398	1.9743	1.47511	0.865682	0	0	0	0	1.80444		0.00381719	0.00146697	0.00095649	0.00274904	0.00260153	0.00206327	0.00161389	0	0	0	0	0.00353173
776.544	H79 C41 N1 O10 P1	0.39ppm	PEOx2 36:2	0	430505	218209	400754	491331	299141	440987	299086	136666	40865	0	326776	388620		PEOx2 36:2	7.88176	2.77387	4.65659	5.19552	5.08351	6.14732	4.17677	2.0955	1.77318	0	6.37878	5.83009		0.00981915	0.00391964	0.00591141	0.00695365	0.00669855	0.00859837	0.00778674	0.00350404	0.0044217	0	0.00926157	0.0114109
774.529	H77 C41 N1 O10 P1	0.97ppm	PEOx2 36:3	127874	182193	289743	429913	400323	306003	286172	237668	68334	40200.8	0	135922	413081		PEOx2 36:3	3.33562	3.68321	4.99539	4.23317	5.20013	3.98921	3.31905	1.04777	1.74436	0	2.65324	6.19706		0.00415554	0.00520458	0.00634152	0.00566565	0.00685221	0.00557979	0.00618769	0.00175205	0.00434984	0	0.00385233	0.0121292
772.513	H75 C41 N1 O10 P1	0.70ppm	PEOx2 36:4	0	45130.9	119602	286473	263500	174751	211528	137594	0	0	0	0	219458		PEOx2 36:4	0.826264	1.52038	3.32869	2.78636	2.96967	2.94868	1.92151	0	0	0	0	3.29232		0.00102936	0.00214838	0.00422568	0.00372924	0.00391313	0.00412438	0.00358227	0	0	0	0	0.00644388
798.528	H77 C43 N1 O10 P1	0.27ppm	PEOx2 38:5	0	349611	474913	857349	662841	590670	294673	397384	363439	92960.5	0	191317	548624		PEOx2 38:5	6.40074	6.0371	9.96201	7.00913	10.0377	4.10771	5.5495	5.57261	4.03367	0	3.73457	8.23047		0.00797408	0.00853076	0.0126465	0.00938098	0.0132267	0.00574554	0.0103459	0.0093184	0.0100586	0	0.00542235	0.0161091
796.512	H75 C43 N1 O10 P1	-0.62ppm	PEOx2 38:6	0	61519.9	310263	476018	340227	219418	246414	222937	71740.2	0	0	40379.5	212501		PEOx2 38:6	1.12632	3.94406	5.53111	3.59769	3.72873	3.43498	3.11333	1.09999	0	0	0.788222	3.18794		0.00140317	0.00557318	0.0070216	0.00481512	0.00491335	0.00480458	0.00580418	0.00183938	0	0	0.00114445	0.00623958
830.59	H85 C45 N1 O10 P1	-1.30ppm	PEOx2 40:3	76402.6	73361.9	198526	236620	224993	229113	120501	132246	34387.8	0	0	0	148753		PEOx2 40:3	1.34312	2.52367	2.74942	2.37916	3.89349	1.67977	1.84683	0.527269	0	0	0	2.2316		0.00167327	0.00356608	0.00349032	0.00318426	0.00513045	0.00234953	0.00344305	0.000881686	0	0	0	0.00436778
828.575	H83 C45 N1 O10 P1	0.48ppm	PEOx2 40:4	0	221564	321283	487728	432474	386685	204112	330477	185426	0	65969.7	161292	383578		PEOx2 40:4	4.05643	4.08416	5.66718	4.57315	6.57122	2.8453	4.61513	2.84313	0	1.24099	3.14848	5.75445		0.00505353	0.00577113	0.00719433	0.00612067	0.0086589	0.00397978	0.00860399	0.00475422	0	0.00318896	0.00457139	0.0112629
826.559	H81 C45 N1 O10 P1	0.19ppm	PEOx2 40:5	0	797526	1.20403e+06	1393170	1.42481e+06	175422	905817	1.12896e+06	824808	474395	152407	948036	1.03525e+06		PEOx2 40:5	14.6012	15.3056	16.188	15.0665	2.98108	12.627	15.7661	12.6468	20.5846	2.86702	18.506	15.5308		0.0181903	0.0216277	0.0205503	0.0201649	0.00392817	0.0176616	0.0293927	0.0211477	0.0513308	0.00736734	0.0268695	0.0303976
824.543	H79 C45 N1 O10 P1	-0.65ppm	PEOx2 40:6	0	416506	552021	683600	609464	383674	498417	418095	429986	0	70380.3	242860	600343		PEOx2 40:6	7.62546	7.0173	7.94312	6.4447	6.52005	6.94789	5.83873	6.59298	0	1.32396	4.74071	9.00636		0.00949985	0.00991583	0.0100836	0.00862555	0.00859148	0.00971815	0.0108851	0.0110246	0	0.00340217	0.0068832	0.0176276
822.527	H77 C45 N1 O10 P1	-1.27ppm	PEOx2 40:7	71256.6	260686	537141	609201	398418	312936	247477	401069	327347	0	62824.3	0	328035		PEOx2 40:7	4.77268	6.82814	7.07864	4.21302	5.31795	3.4498	5.60096	5.01922	0	1.18182	0	4.92119		0.00594584	0.00964854	0.00898615	0.00563868	0.00700746	0.0048253	0.0104419	0.00839302	0	0.00303692	0	0.00963197
820.512	H75 C45 N1 O10 P1	-0.62ppm	PEOx2 40:8	0	27900.4	81272.5	191435	0	0	42225.2	60740.9	68827.4	0	0	0	72739.7		PEOx2 40:8	0.510805	1.03314	2.22439	0	0	0.588615	0.848252	1.05533	0	0	0	1.09124		0.000636364	0.00145988	0.0028238	0	0	0.000823308	0.00158139	0.0017647	0	0	0	0.00213583
770.497	H73 C41 N1 O10 P1	-0.09ppm	PEOx2 36:5	0	0	51567.8	74261.5	108614	0	69548.6	33086.4	0	0	0	0	62645		PEOx2 36:5	0	0.655531	0.862886	1.14853	0	0.969501	0.462054	0	0	0	0	0.939802		0	0.000926301	0.00109541	0.00153718	0	0.00135606	0.000861407	0	0	0	0	0.00183942
858.622	H89 C47 N1 O10 P1	0.44ppm	PEOx2 42:3	0	0	30920.2	101849	55858.9	0	69184.6	0	0	0	0	0	0		PEOx2 42:3	0	0.393058	1.18344	0.590674	0	0.964427	0	0	0	0	0	0		0	0.000555413	0.00150234	0.000790554	0	0.00134896	0	0	0	0	0	0
854.591	H85 C47 N1 O10 P1	0.15ppm	PEOx2 42:5	0	85131.5	253255	320792	291524	230672	110950	168853	106127	0	0	40402.3	174062		PEOx2 42:5	1.5586	3.21938	3.72746	3.08269	3.91998	1.54664	2.35805	1.62724	0	0	0.788667	2.61128		0.00194172	0.00454916	0.00473191	0.00412585	0.00516535	0.00216332	0.0043961	0.00272104	0	0	0.00114509	0.00511091
852.575	H83 C47 N1 O10 P1	0.12ppm	PEOx2 42:6	0	85067.8	164805	311248	204295	140777	110736	163186	184306	0	0	0	68005.9		PEOx2 42:6	1.55743	2.09501	3.61656	2.1603	2.39233	1.54365	2.2789	2.82597	0	0	0	1.02023		0.00194026	0.00296036	0.00459113	0.00289133	0.00315237	0.00215913	0.00424855	0.00472553	0	0	0	0.00199683
850.559	H81 C47 N1 O10 P1	0.02ppm	PEOx2 42:7	0	397126	838330	591992	126752	187645	155091	611201	469876	0	0	194302	541304		PEOx2 42:7	7.27065	10.6569	6.87869	1.34032	3.18879	2.16196	8.53547	7.20462	0	0	3.79283	8.12065		0.00905782	0.0150587	0.00873231	0.00179388	0.00420187	0.00302397	0.0159127	0.0120474	0	0	0.00550694	0.0158941
848.542	H79 C47 N1 O10 P1	-1.77ppm	PEOx2 42:8	0	167367	206089	228554	193749	78191.6	0	284451	391265	0	0	0	104607		PEOx2 42:8	3.06419	2.61981	2.65569	2.04877	1.32877	0	3.97238	5.99926	0	0	0	1.56932		0.00381738	0.00370193	0.00337133	0.00274207	0.00175092	0	0.00740571	0.0100318	0	0	0	0.00307155
###	PhosphatidylethanolamineOx3
788.508	H75 C41 N1 O11 P1	1.54ppm	PEOx3 36:4	0	0	28102.7	136310	90174.8	74337.4	97637.3	28000.1	0	0	0	0	59205.8		PEOx3 36:4	0	0.357242	1.58386	0.953543	1.26327	1.36105	0.391024	0	0	0	0	0.888207		0	0.000504802	0.00201066	0.00127622	0.00166461	0.00190373	0.000728985	0	0	0	0	0.00173844
816.539	H79 C43 N1 O11 P1	0.74ppm	PEOx3 38:4	0	0	211688	408059	241624	139499	81928.6	171150	29083.6	0	0	0	252606		PEOx3 38:4	0	2.69098	4.74147	2.55503	2.37061	1.14208	2.39012	0.445939	0	0	0	3.7896		0	0.0038025	0.00601917	0.00341964	0.00312375	0.00159745	0.0044559	0.000745689	0	0	0	0.00741718
814.524	H77 C43 N1 O11 P1	1.17ppm	PEOx3 38:5	0	24766.5	141394	531240	263674	187939	350951	173951	0	0	0	0	211138		PEOx3 38:5	0.453429	1.7974	6.17277	2.7882	3.19379	4.89223	2.42925	0	0	0	0	3.1675		0.000564885	0.00253983	0.00783616	0.0037317	0.00420846	0.00684286	0.00452884	0	0	0	0	0.00619957
812.508	H75 C43 N1 O11 P1	0.85ppm	PEOx3 38:6	0	23144.2	146623	322619	124532	112457	90239.6	86288.3	26371.2	0	0	0	187898		PEOx3 38:6	0.423728	1.86388	3.74869	1.31685	1.91107	1.25793	1.20502	0.40435	0	0	0	2.81885		0.000527883	0.00263376	0.00475886	0.00176247	0.00251822	0.00175949	0.00224652	0.000676145	0	0	0	0.00551718
844.571	H83 C45 N1 O11 P1	1.48ppm	PEOx3 40:4	0	22986.1	58852	108291	83973.7	0	54921.3	25087.2	0	0	0	0	60636		PEOx3 40:4	0.420833	0.748128	1.2583	0.88797	0	0.765598	0.350345	0	0	0	0	0.909663		0.000524277	0.00105715	0.00159737	0.00118845	0	0.00107086	0.000653147	0	0	0	0	0.00178043
842.556	H81 C45 N1 O11 P1	1.61ppm	PEOx3 40:5	0	0	50367.1	181806	69868.7	0	45058.3	67733.5	0	0	0	0	74058.3		PEOx3 40:5	0	0.640267	2.1125	0.738819	0	0.628108	0.945904	0	0	0	0	1.11102		0	0.000904733	0.00268177	0.00098883	0	0.000878548	0.00176345	0	0	0	0	0.00217455
840.54	H79 C45 N1 O11 P1	1.58ppm	PEOx3 40:6	0	0	138585	381419	243826	0	159689	54824	22951.1	46951.2	0	0	169765		PEOx3 40:6	0	1.76169	4.43191	2.57831	0	2.22605	0.765622	0.351909	2.03727	0	0	2.54682		0	0.00248937	0.0056262	0.00345079	0	0.00311362	0.00142735	0.000588455	0.00508025	0	0	0.00498475
836.508	H75 C45 N1 O11 P1	1.14ppm	PEOx3 40:8	0	0	34432	148709	0	0	30176.4	56709.6	24408.3	0	0	0	0		PEOx3 40:8	0	0.4377	1.72793	0	0	0.420656	0.791954	0.374253	0	0	0	0		0	0.000618494	0.00219356	0	0	0.00058838	0.00147644	0.000625817	0	0	0	0
###	PhosphatidylethanolamineOx4
866.613	H89 C45 N1 O12 P1	1.61ppm	PEOx4 40:1	0	429982	42733.6	53459.8	30520.6	86580.6	89046.9	133712	508423	0	0	0	0		PEOx4 40:1	7.87218	0.54323	0.621179	0.322737	1.47133	1.24131	1.8673	7.79566	0	0	0	0		0.00980721	0.000767614	0.00078857	0.000431949	0.00193877	0.00173624	0.0034812	0.0130357	0	0	0	0
828.504	H75 C43 N1 O12 P1	1.72ppm	PEOx4 38:6	0	0	85663.6	144889	100588	30722.1	32480.3	22313.2	0	0	0	0	130778		PEOx4 38:6	0	1.08896	1.68355	1.06366	0.522083	0.452772	0.311606	0	0	0	0	1.96193		0	0.00153876	0.00213722	0.00142359	0.000687949	0.000633302	0.000580926	0	0	0	0	0.00383999
854.518	H77 C45 N1 O12 P1	0.05ppm	PEOx4 40:7	0	0	0	147476	65692.3	0	58952.4	38212.4	0	0	0	0	99462		PEOx4 40:7	0	0	1.71361	0.694656	0	0.821791	0.533639	0	0	0	0	1.49213		0	0	0.00217538	0.000929723	0	0.00114946	0.000994863	0	0	0	0	0.00292047
888.597	H87 C47 N1 O12 P1	0.74ppm	PEOx4 42:4	0	35527	0	26236.8	0	0	0	0	0	0	0	0	0		PEOx4 42:4	0.650434	0	0.30486	0	0	0	0	0	0	0	0	0		0.000810315	0	0.000387012	0	0	0	0	0	0	0	0	0
###	PhosphatidylethanolamineOx5
854.576	H85 C43 N1 O13 P1	0.77ppm	PEOx5 38:1	0	0	0	0	0	0	0	52165.8	35531.4	0	0	0	0		PEOx5 38:1	0	0	0	0	0	0	0.7285	0.544803	0	0	0	0		0	0	0	0	0	0	0.00135814	0.000911008	0	0	0	0
882.606	H89 C45 N1 O13 P1	-0.42ppm	PEOx5 40:1	0	0	0	0	0	0	0	0	0	0	0	0	0		PEOx5 40:1	0	0	0	0	0	0	0	0	0	0	0	0		0	0	0	0	0	0	0	0	0	0	0	0
876.56	H83 C45 N1 O13 P1	0.37ppm	PEOx5 40:4	0	28105.9	51332.1	36681.8	0	0	0	0	0	0	0	0	0		PEOx5 40:4	0.514567	0.652535	0.426226	0	0	0	0	0	0	0	0	0		0.000641051	0.000922067	0.000541083	0	0	0	0	0	0	0	0	0
906.607	H89 C47 N1 O13 P1	0.19ppm	PEOx5 42:3	0	33344	0	35722.6	0	0	0	0	50424	0	0	0	0		PEOx5 42:3	0.610467	0	0.415081	0	0	0	0	0.773152	0	0	0	0		0.000760524	0	0.000526934	0	0	0	0	0.00129285	0	0	0	0
904.591	H87 C47 N1 O13 P1	-0.15ppm	PEOx5 42:4	0	1.55234e+06	1.23797e+06	1.36993e+06	807745	893290	1.23951e+06	881409	1.49477e+06	981631	939133	863156	777156		PEOx5 42:4	28.4206	15.7371	15.918	8.5414	15.1803	17.2787	12.309	22.9194	42.5941	17.6666	16.8491	11.6589		0.0354065	0.0222374	0.0202075	0.0114318	0.0200031	0.0241681	0.0229476	0.0383253	0.106215	0.0453975	0.0244638	0.0228193
902.576	H85 C47 N1 O13 P1	0.38ppm	PEOx5 42:5	0	17495.8	0	0	0	0	0	0	0	0	0	0	0		PEOx5 42:5	0.320316	0	0	0	0	0	0	0	0	0	0	0		0.000399052	0	0	0	0	0	0	0	0	0	0	0

## Sheet: LPE
																															Normalization against PE
###	LPE			Ctrl Mouse 1	Ctrl Mouse 2	Ctrl Mouse 3	Ctrl Mouse 4	Ctrl Mouse 5	Ctrl Mouse 6	Ctrl Mouse 7	Ctrl Mouse 8	Fento Mouse 1	Fento Mouse 2	Fento Mouse 3	Fento Mouse 4		PE in nmol	802.693	707.687	787.728	747.164	758.898	714.939	536.395	598.023	401.018	389.152	688.737	510.922
464.278	H43 C22 N1 O7 P1	-0.38ppm	LPE 17:1	1.51785e+06	1.59521e+06	1641447	1.08773e+06	1050405	1.3028e+06	1.28759e+06	1656602	829338	1.52987e+06	1.23587e+06	1.29133e+06			Ctrl Mouse 1	Ctrl Mouse 2	Ctrl Mouse 3	Ctrl Mouse 4	Ctrl Mouse 5	Ctrl Mouse 6	Ctrl Mouse 7	Ctrl Mouse 8	Fento Mouse 1	Fento Mouse 2	Fento Mouse 3	Fento Mouse 4		Ctrl Mouse 1	Ctrl Mouse 2	Ctrl Mouse 3	Ctrl Mouse 4	Ctrl Mouse 5	Ctrl Mouse 6	Ctrl Mouse 7	Ctrl Mouse 8	Fento Mouse 1	Fento Mouse 2	Fento Mouse 3	Fento Mouse 4
424.247	H39 C19 N1 O7 P1	0.43ppm	LPE 14:0	150120	143618	169730	77999.4	118988	129657	165156	183850	70753.2	171976	117897	321704		LPE 14:0	2.96709	2.70093	3.10208	2.15125	3.39836	2.98566	3.84805	3.32941	2.55938	3.37236	2.86188	7.47379		0.00369642	0.00381656	0.00393801	0.00287921	0.00447802	0.0041761	0.0071739	0.00556737	0.00638223	0.0086659	0.00415525	0.014628
452.278	H43 C21 N1 O7 P1	0.09ppm	LPE 16:0	191236	239216	351495	142505	182276	227620	102185	139738	81573.7	132858	182769	197987		LPE 16:0	3.77974	4.49879	6.42413	3.93032	5.20588	5.24148	2.38084	2.53057	2.9508	2.60528	4.43658	4.59961		0.00470882	0.00635703	0.00815526	0.00526032	0.00685979	0.00733136	0.0044386	0.00423157	0.00735828	0.00669476	0.00644162	0.00900256
450.263	H41 C21 N1 O7 P1	-0.02ppm	LPE 16:1	22538.1	26148.9	76729.2	51440.8	17810.7	40176.7	12160.8	23742.4	24838.1	35124.5	34387	37827.4		LPE 16:1	0.445461	0.491765	1.40235	1.41875	0.508681	0.925162	0.283339	0.42996	0.898479	0.688772	0.834721	0.878802		0.000554958	0.000694891	0.00178024	0.00189885	0.000670289	0.00129404	0.000528229	0.000718969	0.0022405	0.00176993	0.00121196	0.00172003
480.31	H47 C23 N1 O7 P1	-0.02ppm	LPE 18:0	766602	973926	1.50441e+06	150300	846311	1.16652e+06	630725	496659	588593	1.6766e+06	1.00037e+06	1.01573e+06		LPE 18:0	15.1517	18.316	27.4954	4.14531	24.171	26.8617	14.6955	8.99417	21.2914	32.8772	24.2832	23.5972		0.0188761	0.0258815	0.0349047	0.00554806	0.0318501	0.0375721	0.0273968	0.0150398	0.0530934	0.0844841	0.0352576	0.0461856
478.294	H45 C23 N1 O7 P1	-0.11ppm	LPE 18:1	762203	502065	876959	972357	496660	854815	279492	566970	317078	520323	721391	323910		LPE 18:1	15.0648	9.442	16.0278	26.8179	14.1848	19.6841	6.51201	10.2675	11.4698	10.2032	17.5113	7.52503		0.0187678	0.0133421	0.0203469	0.0358929	0.0186913	0.0275326	0.0121403	0.017169	0.0286017	0.0262192	0.0254252	0.0147283
476.278	H43 C23 N1 O7 P1	-0.16ppm	LPE 18:2	89272.3	163124	237856	288362	186231	217495	87121.4	60208.5	83931.3	102374	148453	185111		LPE 18:2	1.76445	3.06777	4.34719	7.9531	5.31883	5.00833	2.02988	1.09034	3.03608	2.00751	3.60359	4.30047		0.00219816	0.00433492	0.00551865	0.0106444	0.00700862	0.00700525	0.0037843	0.00182324	0.00757094	0.00515866	0.00523218	0.00841707
474.263	H41 C23 N1 O7 P1	0.41ppm	LPE 18:3	17807.6	17750.6	12836.8	8315.4	15486.7	51378.2	18371.6	75213.9	10269.7	10735.1	15826.1	12258.3		LPE 18:3	0.351964	0.333824	0.234613	0.229341	0.442307	1.1831	0.428047	1.36208	0.37149	0.210509	0.384168	0.284783		0.000438478	0.000471711	0.000297834	0.000306949	0.000582827	0.00165483	0.000798008	0.00227763	0.000926369	0.000540944	0.000557786	0.000557391
508.341	H51 C25 N1 O7 P1	-0.30ppm	LPE 20:0	205737	206410	265648	300287	253756	234906	246206	161241	161451	217050	221240	270970		LPE 20:0	4.06634	3.88181	4.85512	8.28201	7.24738	5.40927	5.73644	2.91997	5.84025	4.25622	5.37045	6.29513		0.00506588	0.00548521	0.00616345	0.0110846	0.00954988	0.00756605	0.0106944	0.00488271	0.0145636	0.0109372	0.00779754	0.0123211
506.325	H49 C25 N1 O7 P1	-0.35ppm	LPE 20:1	147291	150408	218596	253426	170934	134394	109601	97584.2	90730.8	103547	145834	162374		LPE 20:1	2.91118	2.82863	3.99519	6.98955	4.88195	3.09475	2.55363	1.76719	3.28204	2.03051	3.54003	3.77226		0.00362676	0.00399701	0.00507179	0.00935477	0.00643295	0.00432868	0.00476073	0.00295505	0.00818429	0.00521777	0.00513989	0.00738324
504.31	H47 C25 N1 O7 P1	0.40ppm	LPE 20:2	27287.1	35773.9	65218.8	62173.6	43666.3	48027.1	24932.8	16800.6	10888	22955	27322.3	55178.8		LPE 20:2	0.539324	0.672776	1.19198	1.71477	1.24713	1.10594	0.580919	0.304248	0.393856	0.450135	0.66323	1.28191		0.000671893	0.000950669	0.00151318	0.00229503	0.00164334	0.00154689	0.00108301	0.000508757	0.000982142	0.00115671	0.000962966	0.00250901
502.294	H45 C25 N1 O7 P1	0.32ppm	LPE 20:3	9034.2	35468.2	48848.1	82173.6	15999.1	31706.6	17877.9	8417.3	13208.3	25570.6	14736.8	35690.3		LPE 20:3	0.178559	0.667027	0.892775	2.26637	0.456941	0.730118	0.416544	0.152432	0.477789	0.501426	0.357726	0.829153		0.00022245	0.000942545	0.00113335	0.0030333	0.000602111	0.00102123	0.000776563	0.000254893	0.00119144	0.00128851	0.000519394	0.00162285
500.278	H43 C25 N1 O7 P1	0.28ppm	LPE 20:4	222189	355929	638014	144070	410728	527721	219807	132854	247558	301352	388673	443295		LPE 20:4	4.39152	6.69372	11.6607	3.9735	11.7306	12.152	5.12137	2.4059	8.95501	5.90935	9.43477	10.2986		0.00547098	0.00945859	0.0148029	0.0053181	0.0154574	0.0169972	0.00954776	0.00402309	0.0223307	0.0151852	0.0136987	0.0201568
528.309	H47 C27 N1 O7 P1	-0.10ppm	LPE 22:4	51173	80005.4	119877	177051	69483.6	129707	36549.2	37539.5	39473.3	65475.8	91130.1	83518.6		LPE 22:4	1.01142	1.50461	2.19095	4.88312	1.98448	2.9868	0.851574	0.679816	1.42788	1.28394	2.21212	1.94029		0.00126004	0.00212609	0.00278135	0.00653554	0.00261495	0.00417769	0.00158759	0.00113677	0.00356065	0.00329934	0.00321185	0.00379763
526.294	H45 C27 N1 O7 P1	-0.04ppm	LPE 22:5	14809.8	36798.4	59872.7	71365.8	22853.6	47052.5	19516.5	18028.7	12703.2	15289	33219.1	27362.7		LPE 22:5	0.292713	0.692043	1.09427	1.96829	0.652708	1.08349	0.454723	0.326488	0.459518	0.299809	0.806371	0.635687		0.000364663	0.000977894	0.00138914	0.00263435	0.000860074	0.0015155	0.000847739	0.000545946	0.00114588	0.000770415	0.0011708	0.00124419
524.277	H43 C27 N1 O7 P1	-1.98ppm	LPE 22:6	199353	293450	355900	471592	267366	291213	181579	161796	157166	225005	245216	281146		LPE 22:6	3.94017	5.51873	6.50462	13.0066	7.6361	6.70585	4.23068	2.93003	5.68522	4.41222	5.95245	6.53155		0.00490869	0.00779826	0.00825744	0.017408	0.0100621	0.00937961	0.00788725	0.00489953	0.014177	0.011338	0.00864256	0.0127838

## Sheet: PS and PSOx
precursorexpmz$A	sumcomposition	precursorppmdev$A	name	intensity:E8_Sebastian_2_00.mzML	intensity:E8_Sebastian_2_31.mzML	intensity:E8_Sebastian_2_32.mzML	intensity:E8_Sebastian_2_33.mzML	intensity:E8_Sebastian_2_34.mzML	intensity:E8_Sebastian_2_35.mzML	intensity:E8_Sebastian_2_36.mzML	intensity:E8_Sebastian_2_37.mzML	intensity:E8_Sebastian_2_38.mzML	intensity:E8_Sebastian_2_39.mzML	intensity:E8_Sebastian_2_40.mzML	intensity:E8_Sebastian_2_41.mzML	intensity:E8_Sebastian_2_42.mzML		Normalization													Normalization against PS
###	Phosphatidylserine			0	Ctrl Mouse 1	Ctrl Mouse 2	Ctrl Mouse 3	Ctrl Mouse 4	Ctrl Mouse 5	Ctrl Mouse 6	Ctrl Mouse 7	Ctrl Mouse 8	Fento Mouse 1	Fento Mouse 2	Fento Mouse 3	Fento Mouse 4	PS in nmol	1358.89	668.512	880.515	1223.94	716.283	1183.71	458.683	659.843	633.984	674.654	1072.89	373.164		Ctrl Mouse 1	Ctrl Mouse 2	Ctrl Mouse 3	Ctrl Mouse 4	Ctrl Mouse 5	Ctrl Mouse 6	Ctrl Mouse 7	Ctrl Mouse 8	Fento Mouse 1	Fento Mouse 2	Fento Mouse 3	Fento Mouse 4
762.529	H77 C40 N1 O10 P1	0.61ppm	PS 34:0	9.42984e+06	2.48555e+06	3.63943e+06	2.51209e+06	1.97399e+06	2.72915e+06	2.68502e+06	2.8729e+06	3.12492e+06	2.29548e+06	2.29165e+06	2.93929e+06	2544381		Ctrl Mouse 1	Ctrl Mouse 2	Ctrl Mouse 3	Ctrl Mouse 4	Ctrl Mouse 5	Ctrl Mouse 6	Ctrl Mouse 7	Ctrl Mouse 8	Fento Mouse 1	Fento Mouse 2	Fento Mouse 3	Fento Mouse 4
734.498	H73 C38 N1 O10 P1	0.86ppm	PS 32:0	0	30400.7	69269.9	47632.3	138352	91148.2	75249.3	36781.5	12340.1	43747.3	18922.3	73150	42692.1	PS 32:0	0.611549	0.951659	0.94806	3.50437	1.6699	1.40128	0.640145	0.197446	0.952902	0.412854	1.24435	0.838949		0.000450034	0.00142355	0.00107671	0.00286319	0.00233134	0.00118381	0.00139561	0.000299232	0.00150304	0.000611949	0.00115981	0.0022482
732.483	H71 C38 N1 O10 P1	1.22ppm	PS 32:1	0	21692.2	39521.3	66848.7	84034.3	26288.3	42136.6	26503.1	21644.1	15870.1	12718.5	42031.8	25715.3	PS 32:1	0.436366	0.54296	1.33054	2.12854	0.48162	0.784662	0.46126	0.346314	0.345682	0.277497	0.715	0.505335		0.000321119	0.000812192	0.00151109	0.00173909	0.000672389	0.000662884	0.00100562	0.000524843	0.000545253	0.000411318	0.000666422	0.00135419
760.514	H75 C40 N1 O10 P1	0.63ppm	PS 34:1	0	1.80788e+06	1.2836e+06	1.28113e+06	1702450	1.35815e+06	1.63489e+06	745894	1.0406e+06	770465	743115	1.60935e+06	568350	PS 34:1	36.3677	17.6346	25.4992	43.1221	24.8822	30.4447	12.9815	16.6501	16.7822	16.2136	27.3766	11.1687		0.0267627	0.0263789	0.0289594	0.0352322	0.034738	0.0257198	0.0283017	0.0252334	0.0264711	0.0240324	0.0255166	0.0299298
788.545	H79 C42 N1 O10 P1	0.79ppm	PS 36:1	0	3.18826e+07	1.81441e+07	1.52351e+07	1.69098e+07	1.40705e+07	2.76112e+07	9.67625e+06	1.84564e+07	1.14723e+07	1.33609e+07	2.82761e+07	5.324e+06	PS 36:1	641.36	249.271	303.235	428.317	257.781	514.172	168.405	295.309	249.889	291.514	481.003	104.623		0.471972	0.372874	0.344383	0.349949	0.359888	0.434374	0.36715	0.447545	0.394157	0.432094	0.448323	0.280366
816.577	H83 C44 N1 O10 P1	1.07ppm	PS 38:1	0	3.76856e+06	3.55462e+06	3.40475e+06	3.8605e+06	2.40566e+06	3.91655e+06	2.06911e+06	2.49716e+06	2.13091e+06	2.07957e+06	3.5951e+06	1.59804e+06	PS 38:1	75.8094	48.8348	67.7672	97.7841	44.0734	72.9335	36.0108	39.9555	46.4153	45.3729	61.156	31.4034		0.0557876	0.07305	0.0769631	0.0798929	0.0615307	0.0616144	0.0785092	0.060553	0.0732121	0.0672536	0.057001	0.0841544
844.608	H87 C46 N1 O10 P1	0.71ppm	PS 40:1	0	6.16892e+06	3.98223e+06	4.3344e+06	4.42811e+06	3.34894e+06	6.00351e+06	2.50052e+06	3.65154e+06	3.07107e+06	3.10001e+06	5.97658e+06	2.05582e+06	PS 40:1	124.096	54.7095	86.2707	112.161	61.355	111.796	43.5191	58.426	66.894	67.6373	101.667	40.3992		0.0913211	0.0818377	0.0979775	0.0916396	0.0856576	0.0944459	0.0948783	0.0885453	0.105514	0.100255	0.0947598	0.108261
872.64	H91 C48 N1 O10 P1	1.16ppm	PS 42:1	0	4.84384e+06	1.8472e+06	1.58243e+06	1.17056e+06	1.12143e+06	3.67727e+06	808266	2.90312e+06	1.39494e+06	1.75605e+06	4.27224e+06	164183	PS 42:1	97.4401	25.3777	31.4963	29.6497	20.5454	68.4776	14.0671	46.4511	30.3844	38.3141	72.6748	3.22639		0.0717055	0.0379614	0.0357703	0.0242248	0.0286833	0.0578501	0.0306684	0.0703972	0.0479262	0.0567907	0.0677371	0.00864603
842.592	H85 C46 N1 O10 P1	0.77ppm	PS 40:2	0	1.82325e+06	1.4296e+06	1.49951e+06	1.49124e+06	913827	1.75896e+06	837925	1.09883e+06	832742	834066	1.60233e+06	555768	PS 40:2	36.677	19.6405	29.8458	37.7723	16.742	32.7552	14.5832	17.5817	18.1387	18.198	27.2571	10.9215		0.0269903	0.0293794	0.0338958	0.0308613	0.0233734	0.0276716	0.0317937	0.0266452	0.0286107	0.0269738	0.0254052	0.0292672
786.53	H77 C42 N1 O10 P1	1.03ppm	PS 36:2	0	6016790	5250196	4.42494e+06	5.11804e+06	5.8563e+06	6.69103e+06	2.98186e+06	3.79686e+06	3.26491e+06	3.0819e+06	6.53114e+06	2.73501e+06	PS 36:2	121.035	72.1294	88.0727	129.637	107.292	124.599	51.8963	60.7513	71.1162	67.2421	111.101	53.746		0.0890691	0.107895	0.100024	0.105918	0.149789	0.105262	0.113142	0.0920693	0.112173	0.0996691	0.103552	0.144028
814.561	H81 C44 N1 O10 P1	1.08ppm	PS 38:2	0	592425	521332	503762	640392	392378	645018	308651	394649	279030	289643	547498	232903	PS 38:2	11.9174	7.16228	10.0267	16.2207	7.18865	12.0114	5.37175	6.31454	6.07783	6.31953	9.31344	4.5768		0.00876992	0.0107138	0.0113874	0.0132529	0.010036	0.0101473	0.0117113	0.00956976	0.00958673	0.00936707	0.00868067	0.0122648
870.624	H89 C48 N1 O10 P1	1.05ppm	PS 42:2	0	1.42106e+06	703289	733705	740284	515477	1.22574e+06	425767	764643	515388	613126	1.2736e+06	239212	PS 42:2	28.5863	9.66208	14.6035	18.751	9.4439	22.8256	7.41005	12.2346	11.2262	13.3774	21.6651	4.70079		0.0210365	0.0144531	0.0165851	0.0153202	0.0131846	0.0192832	0.016155	0.0185417	0.0177073	0.0198286	0.0201931	0.0125971
758.498	H73 C40 N1 O10 P1	0.65ppm	PS 34:2	0	208280	286742	231368	328739	346210	305893	148192	124649	163059	115041	281456	216185	PS 34:2	4.18981	3.93938	4.60508	8.32677	6.34281	5.6963	2.57913	1.99443	3.55175	2.51	4.78782	4.24827		0.00308325	0.00589275	0.00522999	0.00680325	0.00885517	0.00481225	0.0056229	0.00302259	0.00560227	0.00372043	0.00446253	0.0113845
808.514	H75 C44 N1 O10 P1	1.15ppm	PS 38:5	0	140433	129291	124891	221786	134114	151178	59041	92573.6	74308.9	85642.9	161026	74943.4	PS 38:5	2.82499	1.77626	2.4858	5.61772	2.45706	2.81521	1.02755	1.48121	1.61859	1.86859	2.73919	1.47272		0.00207889	0.00265703	0.00282312	0.00458986	0.0034303	0.00237829	0.00224021	0.0022448	0.00255305	0.0027697	0.00255309	0.00394658
784.514	H75 C42 N1 O10 P1	0.87ppm	PS 36:3	31482.6	246225	192174	180970	276257	210208	314189	139904	143911	137722	122734	275048	112206	PS 36:3	4.95313	2.64016	3.60197	6.99743	3.85116	5.85079	2.43488	2.30264	2.99985	2.67786	4.67882	2.20497		0.00364497	0.00394931	0.00409076	0.00571714	0.00537659	0.00494276	0.00530841	0.00348967	0.00473175	0.00396924	0.00436093	0.00590886
812.545	H79 C44 N1 O10 P1	0.85ppm	PS 38:3	0	807494	1.17092e+06	1107488	1.17326e+06	957000	1.22127e+06	595451	612217	526058	463185	913018	568903	PS 38:3	16.2438	16.0866	22.0431	29.7181	17.5329	22.7424	10.3632	9.79571	11.4586	10.1059	15.5313	11.1796		0.0119537	0.0240633	0.0250344	0.0242807	0.0244776	0.0192128	0.0225934	0.0148455	0.0180739	0.0149794	0.0144761	0.0299589
840.577	H83 C46 N1 O10 P1	0.84ppm	PS 40:3	0	1.29247e+06	1.81471e+06	1.61744e+06	1.93941e+06	1.09689e+06	1.20094e+06	927486	972592	895097	798902	1.08864e+06	986584	PS 40:3	25.9997	24.9312	32.1931	49.1241	20.0958	22.3637	16.142	15.5619	19.497	17.4307	18.5188	19.3875		0.019133	0.0372936	0.0365617	0.040136	0.0280557	0.0188929	0.0351919	0.0235842	0.0307531	0.0258366	0.0172606	0.0519544
838.561	H81 C46 N1 O10 P1	0.85ppm	PS 40:4	0	1.03735e+06	1.30363e+06	1.3237e+06	1313849	1.00117e+06	1.2195e+06	623318	782255	518393	500425	1.12084e+06	582356	PS 40:4	20.8677	17.9098	26.3465	33.279	18.3422	22.7094	10.8482	12.5164	11.2916	10.9185	19.0665	11.444		0.0153564	0.0267906	0.0299217	0.0271901	0.0256075	0.019185	0.0236508	0.0189687	0.0178106	0.0161838	0.0177711	0.0306674
836.546	H79 C46 N1 O10 P1	1.36ppm	PS 40:5	0	527596	678096	691861	746750	419677	475391	322313	453777	266790	209918	495396	224042	PS 40:5	10.6133	9.31597	13.7706	18.9147	7.68879	8.85266	5.60954	7.26062	5.81121	4.58008	8.42715	4.40268		0.00781023	0.0139354	0.0156393	0.015454	0.0107343	0.00747875	0.0122297	0.0110035	0.00916617	0.00678879	0.00785459	0.0117982
832.514	H75 C46 N1 O10 P1	1.34ppm	PS 40:7	0	91412.7	77724.6	79268	113695	47016	72032.7	39131.4	59295.5	48100.6	18392.3	101889	40773.9	PS 40:7	1.83888	1.06781	1.57773	2.87984	0.861367	1.34138	0.681042	0.948751	1.04773	0.40129	1.73323	0.801254		0.00135322	0.0015973	0.00179182	0.00235292	0.00120255	0.0011332	0.00148478	0.00143784	0.00165261	0.000594809	0.00161547	0.00214719
782.499	H73 C42 N1 O10 P1	0.95ppm	PS 36:4	0	87681.6	132047	113193	243929	153710	138616	60244.2	69161.3	79705.9	47448.3	145058	90968.8	PS 36:4	1.76383	1.81411	2.25296	6.17857	2.81607	2.58128	1.04849	1.10661	1.73615	1.03525	2.46757	1.78764		0.00129799	0.00271366	0.00255868	0.0050481	0.00393151	0.00218067	0.00228587	0.00167708	0.00273848	0.00153448	0.00229992	0.00479049
810.53	H77 C44 N1 O10 P1	1.20ppm	PS 38:4	0	2.1564e+06	2.75044e+06	2.3755e+06	2769213	2.22997e+06	2539561	1.17169e+06	1.2495e+06	1.12159e+06	923348	2.29673e+06	1.07814e+06	PS 38:4	43.3786	37.7867	47.2813	70.1426	40.8547	47.2914	20.3921	19.9925	24.4305	20.146	39.0696	21.1868		0.031922	0.0565236	0.0536973	0.0573088	0.0570371	0.0399519	0.0444578	0.0302989	0.0385349	0.0298612	0.0364151	0.056776
868.608	H87 C48 N1 O10 P1	0.86ppm	PS 42:3	0	1.31199e+06	1.43188e+06	1.67274e+06	1.71494e+06	1.2575e+06	1.52219e+06	965129	893023	1.10473e+06	919577	1.37993e+06	1166564	PS 42:3	26.3924	19.6717	33.2938	43.4383	23.0383	28.346	16.7971	14.2887	24.0632	20.0637	23.4739	22.9243		0.019422	0.0294261	0.0378117	0.0354906	0.0321637	0.0239468	0.0366202	0.0216547	0.0379555	0.0297392	0.021879	0.0614323
866.593	H85 C48 N1 O10 P1	1.29ppm	PS 42:4	0	614392	631086	720310	760240	416181	523106	397927	450206	379005	324056	549967	306072	PS 42:4	12.3593	8.67013	14.3369	19.2564	7.62474	9.7412	6.92551	7.20348	8.25548	7.07038	9.35545	6.01466		0.0090951	0.0129693	0.0162824	0.0157331	0.0106449	0.00822939	0.0150987	0.010917	0.0130216	0.01048	0.00871982	0.016118
864.578	H83 C48 N1 O10 P1	1.98ppm	PS 42:5	0	652771	1236383	885803	435022	727140	600087	487703	698250	0	502613	462736	0	PS 42:5	13.1313	16.986	17.6308	11.0189	13.3217	11.1747	8.48797	11.1723	0	10.9662	7.87157	0		0.00966325	0.0254086	0.0200232	0.00900277	0.0185984	0.00944044	0.0185051	0.0169317	0	0.0162546	0.00733676	0
862.562	H81 C48 N1 O10 P1	1.30ppm	PS 42:6	0	0	0	0	0	0	0	0	0	0	0	0	0	PS 42:6	0	0	0	0	0	0	0	0	0	0	0	0		0	0	0	0	0	0	0	0	0	0	0	0
###	PhosphatidylserineOx1
750.493	H73 C38 N1 O11 P1	0.78ppm	PSOx1 32:0	26650.6	25685.7	38112.9	18950.8	0	39738.7	55523.1	46773.1	20556.8	27427.1	38971	56141.1	38384.3	PSOx1 32:0	0.516701	0.523611	0.377191	0	0.728041	1.03394	0.814038	0.328917	0.597416	0.850284	0.955012	0.754295		0.000380236	0.000783249	0.000428376	0	0.00101642	0.000873478	0.00177473	0.000498477	0.00094232	0.00126033	0.000890127	0.00202135
806.556	H81 C42 N1 O11 P1	0.64ppm	PSOx1 36:0	47540.4	0	31599	19049.3	17177.7	17189.4	0	0	0	44613.6	0	0	32272.1	PSOx1 36:0	0	0.43412	0.379152	0.435101	0.314922	0	0	0	0.971772	0	0	0.634184		0	0.000649383	0.000430602	0.000355492	0.000439662	0	0	0	0.0015328	0	0	0.00169948
834.587	H85 C44 N1 O11 P1	0.61ppm	PSOx1 38:0	0	0	0	28607.1	68780.6	27318.5	7348.5	0	0	64673	86139.1	78360.7	48136.4	PSOx1 38:0	0	0	0.569388	1.74217	0.500494	0.136843	0	0	1.4087	1.87942	1.33299	0.945935		0	0	0.000646653	0.00142341	0.000698739	0.000115605	0	0	0.00222199	0.00278575	0.00124242	0.0025349
862.618	H89 C46 N1 O11 P1	0.14ppm	PSOx1 40:0	0	0	0	0	78884.7	0	0	0	0	0	0	0	0	PSOx1 40:0	0	0	0	1.9981	0	0	0	0	0	0	0	0		0	0	0	0.00163252	0	0	0	0	0	0	0	0
804.54	H79 C42 N1 O11 P1	0.78ppm	PSOx1 36:1	61870.7	57548	86209.3	112929	179572	114435	120732	60805.7	46097.4	100455	81753.9	110221	86883.1	PSOx1 36:1	1.15765	1.18438	2.2477	4.54847	2.09653	2.24825	1.05826	0.737576	2.18812	1.78374	1.87496	1.70735		0.000851907	0.00177167	0.00255271	0.00371625	0.00292696	0.00189933	0.00230717	0.00111781	0.00345137	0.00264393	0.00174757	0.00457534
832.572	H83 C44 N1 O11 P1	1.05ppm	PSOx1 38:1	0	89494.7	146406	177683	266304	153269	163480	96470.1	30349.1	125609	93651.9	149651	121386	PSOx1 38:1	1.8003	2.01139	3.53656	6.74532	2.808	3.0443	1.67896	0.485598	2.73602	2.04333	2.5457	2.38536		0.00132483	0.00300875	0.00401646	0.00551115	0.00392024	0.00257183	0.0036604	0.000735929	0.00431559	0.00302871	0.00237274	0.00639226
860.602	H87 C46 N1 O11 P1	0.29ppm	PSOx1 40:1	0	88349.2	46661.9	52514.9	104756	51000.7	116446	27630.1	55667.5	57722	32862.4	77210.9	35224.5	PSOx1 40:1	1.77726	0.641061	1.04524	2.65341	0.934369	2.16845	0.480874	0.890702	1.2573	0.717005	1.31343	0.692202		0.00130787	0.000958937	0.00118708	0.00216792	0.00130447	0.00183191	0.00104838	0.00134987	0.00198317	0.00106277	0.00122419	0.00185495
830.557	H81 C44 N1 O11 P1	1.48ppm	PSOx1 38:2	0	260546	179532	170818	235560	179834	294722	113337	158337	144306	148088	243597	87719.2	PSOx1 38:2	5.24123	2.46649	3.39992	5.9666	3.29469	5.48827	1.97251	2.53345	3.14327	3.23105	4.14381	1.72378		0.00385698	0.00368952	0.00386129	0.00487491	0.0045997	0.00463651	0.00430038	0.00383947	0.00495797	0.00478919	0.00386227	0.00461937
802.525	H77 C42 N1 O11 P1	1.58ppm	PSOx1 36:2	0	92896	115930	145807	237310	140267	194239	84459.2	49279.3	93119.3	76350.7	132104	68700.4	PSOx1 36:2	1.86872	1.59269	2.9021	6.01093	2.56979	3.6171	1.46993	0.788488	2.02832	1.66585	2.24721	1.35004		0.00137518	0.00238244	0.00329592	0.00491113	0.00358767	0.00305573	0.00320467	0.00119496	0.00319933	0.00246919	0.00209453	0.00361782
858.587	H85 C46 N1 O11 P1	1.04ppm	PSOx1 40:2	0	14539.5	39360.9	68875.9	97273.1	68918.5	76093.2	21908	13538.7	49115.4	21839.2	52474.5	51590.5	PSOx1 40:2	0.292481	0.540757	1.37089	2.46387	1.26264	1.417	0.381287	0.216625	1.06983	0.476496	0.89264	1.01381		0.000215234	0.000808896	0.00155691	0.00201307	0.00176276	0.00119708	0.000831263	0.000328297	0.00168747	0.000706282	0.000831993	0.0027168
792.445	H67 C42 N1 O11 P1	-1.43ppm	PSOx1 36:7	-1.7	2989.1	0	21424.6	0	7258.1	0	12876.6	10538	0	12672.7	12183.2	0	PSOx1 36:7	0.0601296	0	0.426429	0	0.132974	0	0.224104	0.168612	0	0.276498	0.207248	0		4.42489e-05	0	0.000484295	0	0.000185644	0	0.000488582	0.000255534	0	0.000409837	0.000193167	0
828.541	H79 C44 N1 O11 P1	1.28ppm	PSOx1 38:3	0	75887.9	34827.7	49048.3	144748	86004.2	101991	50384.8	32513.7	47106.9	42631.9	84119.1	42493.3	PSOx1 38:3	1.52658	0.478478	0.976244	3.66639	1.57566	1.89926	0.876896	0.520232	1.02608	0.930159	1.43094	0.835042		0.0011234	0.000715735	0.00110872	0.00299557	0.00219977	0.0016045	0.00191177	0.000788418	0.00161846	0.00137872	0.00133372	0.00223773
826.525	H77 C44 N1 O11 P1	1.71ppm	PSOx1 38:4	0	10307.4	62828.2	37894.1	132448	73830.6	64713.9	18982.9	0	44637.9	18821.9	43881.1	30008.2	PSOx1 38:4	0.207347	0.86316	0.754233	3.35483	1.35263	1.20509	0.330378	0	0.972301	0.410663	0.746458	0.589695		0.000152585	0.00129117	0.000856582	0.00274101	0.0018884	0.00101807	0.000720275	0	0.00153364	0.000608702	0.000695743	0.00158026
824.509	H75 C44 N1 O11 P1	1.15ppm	PSOx1 38:5	0	0	29659.2	0	33782.4	55246.5	35604.3	0	0	17553.4	0	16402.9	19167.5	PSOx1 38:5	0	0.407471	0	0.855689	1.01216	0.663018	0	0	0.382347	0	0.279029	0.376663		0	0.000609519	0	0.000699126	0.00141307	0.00056012	0	0	0.000603087	0	0.000260071	0.00100938
822.494	H73 C44 N1 O11 P1	1.08ppm	PSOx1 38:6	43669.1	21964	8725.2	23977.7	29983.3	0	0	28280.1	0	0	0	18815.7	38453.5	PSOx1 38:6	0.441834	0.119871	0.477245	0.75946	0	0	0.492187	0	0	0	0.320073	0.755655		0.000325142	0.000179309	0.000542007	0.000620504	0	0	0.00107304	0	0	0	0.000298326	0.00202499
800.509	H75 C42 N1 O11 P1	0.88ppm	PSOx1 36:3	0	0	0	29403.1	98462.4	31583.1	37446.3	14529	0	0	0	21545.9	41310.6	PSOx1 36:3	0	0	0.585231	2.494	0.578625	0.69732	0.252863	0	0	0	0.366516	0.811801		0	0	0.000664646	0.00203768	0.000807816	0.000589097	0.000551279	0	0	0	0.000341614	0.00217545
790.429	H65 C42 N1 O11 P1	-1.22ppm	PSOx1 36:8	68341.1	69227.8	53501.6	98510.5	0	24666.6	30348.4	12810.2	94047.9	42494.3	88667	50726.3	50196.5	PSOx1 36:8	1.39261	0.735028	1.96073	0	0.45191	0.565144	0.222949	1.5048	0.925609	1.93457	0.862902	0.986419		0.00102481	0.0010995	0.00222679	0	0.00063091	0.000477435	0.000486062	0.00228055	0.00145999	0.0028675	0.000804275	0.00264339
770.462	H69 C40 N1 O11 P1	0.29ppm	PSOx1 34:4	0	0	0	0	51543.9	23208.8	0	0	0	0	0	0	0	PSOx1 34:4	0	0	0	1.30558	0.425202	0	0	0	0	0	0	0		0	0	0	0.0010667	0.000593623	0	0	0	0	0	0	0
856.572	H83 C46 N1 O11 P1	0.97ppm	PSOx1 40:3	0	36589.6	83170.6	102316	223021	121626	105629	69197.6	16940.3	91372	66925.6	98282.2	86548.4	PSOx1 40:3	0.736047	1.14263	2.03647	5.64899	2.22827	1.96701	1.20431	0.271051	1.99026	1.46021	1.67187	1.70078		0.000541651	0.00170922	0.00231282	0.00461541	0.00311088	0.00166174	0.00262559	0.000410782	0.00313929	0.00216438	0.00155828	0.00455771
854.556	H81 C46 N1 O11 P1	0.71ppm	PSOx1 40:4	0	32101.2	78843.7	53823.8	124074	106176	95210.5	49697.1	20034.7	65105	52015.3	47516	42526.5	PSOx1 40:4	0.645757	1.08319	1.07129	3.14274	1.94522	1.773	0.864928	0.320563	1.41811	1.13489	0.808291	0.835694		0.000475208	0.0016203	0.00121667	0.00256772	0.00271572	0.00149783	0.00188568	0.000485817	0.00223683	0.00168218	0.000753375	0.00223948
852.54	H79 C46 N1 O11 P1	0.96ppm	PSOx1 40:5	0	19120.2	57153.2	75778.8	122888	91035.6	85552.5	21052.2	0	22722.4	14091.9	48162.8	62158.7	PSOx1 40:5	0.384627	0.785195	1.50828	3.11267	1.66784	1.59315	0.366392	0	0.494938	0.307463	0.819294	1.22149		0.000283044	0.00117454	0.00171295	0.00254315	0.00232846	0.00134589	0.000798791	0	0.00078068	0.000455734	0.00076363	0.00327333
850.525	H77 C46 N1 O11 P1	0.97ppm	PSOx1 40:6	0	0	75861.4	37792.1	75870.1	56469.5	44999.2	9519.8	0	9962.4	13967.7	27788.3	25416.2	PSOx1 40:6	0	1.04222	0.752203	1.92175	1.03456	0.837969	0.165682	0	0.217001	0.304753	0.472705	0.499457		0	0.00155901	0.000854276	0.00157013	0.00144435	0.000707918	0.000361213	0	0.000342281	0.000451717	0.000440588	0.00133844
846.492	H73 C46 N1 O11 P1	-0.17ppm	PSOx1 40:8	16714.8	31853.4	39817	64804.9	0	33443.9	41553	26656.4	47070.5	30488.7	37090.9	31971.4	42117.1	PSOx1 40:8	0.640772	0.547023	1.28986	0	0.612716	0.773794	0.463928	0.753146	0.664104	0.809264	0.543863	0.827649		0.000471539	0.000818269	0.00146489	0	0.000855411	0.000653703	0.00101143	0.0011414	0.00104751	0.00119952	0.000506912	0.00221792
884.603	H87 C48 N1 O11 P1	0.92ppm	PSOx1 42:3	0	27412	28268.4	23898.9	94145.2	41262.8	57762.8	16928.4	19169.8	40540.4	0	27958.7	65602.1	PSOx1 42:3	0.551427	0.388363	0.475677	2.38464	0.755964	1.07565	0.294622	0.306724	0.883049	0	0.475604	1.28916		0.000405791	0.000580937	0.000540226	0.00194833	0.0010554	0.000908712	0.00064232	0.000464844	0.00139286	0	0.00044329	0.00345466
882.588	H85 C48 N1 O11 P1	1.38ppm	PSOx1 42:4	0	14930.2	39774.7	31737.7	78353.5	38253.5	53020.5	8978.1	0	43065.6	17338.6	36503	29222.9	PSOx1 42:4	0.30034	0.546442	0.631698	1.98465	0.700831	0.987341	0.156255	0	0.938053	0.3783	0.62095	0.574263		0.000221018	0.0008174	0.000717419	0.00162152	0.000978429	0.000834108	0.000340659	0	0.00147962	0.000560732	0.000578762	0.0015389
880.572	H83 C48 N1 O11 P1	1.48ppm	PSOx1 42:5	0	0	51413.9	29929.1	108426	39219.7	46433.5	35111.1	0	27479.5	9978.8	34091.8	40515.7	PSOx1 42:5	0	0.706346	0.5957	2.74637	0.718533	0.864678	0.611073	0	0.598557	0.217721	0.579933	0.79618		0	0.00105659	0.000676536	0.00224387	0.00100314	0.000730482	0.00133223	0	0.000944121	0.000322716	0.000540532	0.00213359
878.557	H81 C48 N1 O11 P1	1.63ppm	PSOx1 42:6	0	0	25461.6	0	29382.2	28486.6	14685.4	0	0	9774	0	0	15695.7	PSOx1 42:6	0	0.349802	0	0.744234	0.521895	0.27347	0	0	0.212897	0	0	0.308438		0	0.000523255	0	0.000608064	0.000728616	0.000231028	0	0	0.000335808	0	0	0.000826549
																															0	0	0	0	0	0	0	0	0	0	0	0
###	PhosphatidylserineOx2
764.473	H71 C38 N1 O12 P1	1.09ppm	PSOx2 32:1	0	0	0	0	0	0	0	0	0	0	0	0	5661.4	PSOx2 32:1	0	0	0	0	0	0	0	0	0	0	0	0.111253		0	0	0	0	0	0	0	0	0	0	0	0.000298134
848.565	H83 C44 N1 O12 P1	-0.49ppm	PSOx2 38:1	21068	0	0	0	76186.1	0	0	72904.6	0	0	0	0	41787.9	PSOx2 38:1	0	0	0	1.92975	0	0	1.26883	0	0	0	0	0.82118		0	0	0	0.00157667	0	0	0.00276625	0	0	0	0	0.00220059
792.504	H75 C40 N1 O12 P1	0.96ppm	PSOx2 34:1	0	0	0	20701.2	21466.4	8610.5	21336.2	0	6093.4	0	9869.8	0	10713.3	PSOx2 34:1	0	0	0.412031	0.543731	0.157751	0.39732	0	0.0974968	0	0.215343	0	0.210529		0	0	0.000467943	0.000444247	0.000220235	0.000335657	0	0.000147758	0	0.00031919	0	0.000564172
902.613	H89 C48 N1 O12 P1	0.32ppm	PSOx2 42:2	5042.1	1.44566e+06	506595	474876	281745	357384	1.23781e+06	357404	859810	548860	750984	1.25718e+06	41196.3	PSOx2 42:2	29.0813	6.95981	9.4518	7.13643	6.54753	23.0504	6.22026	13.7573	11.9553	16.3853	21.3857	0.809554		0.0214007	0.0104109	0.0107344	0.0058307	0.00914099	0.019473	0.0135611	0.0208494	0.0188573	0.0242869	0.0199328	0.00216943
818.52	H77 C42 N1 O12 P1	1.19ppm	PSOx2 36:2	0	634382	464813	525590	678583	520995	644965	344994	428771	327231	334257	566988	317460	PSOx2 36:2	12.7614	6.3858	10.4612	17.1881	9.545	12.0104	6.00426	6.8605	7.12773	7.29295	9.64499	6.23845		0.00939103	0.00955226	0.0118808	0.0140433	0.0133257	0.0101465	0.0130902	0.0103972	0.0112428	0.0108099	0.00898969	0.0167177
874.582	H85 C46 N1 O12 P1	0.36ppm	PSOx2 40:2	0	740515	336961	366893	353144	304437	668677	257681	449531	307892	412515	709726	187132	PSOx2 40:2	14.8964	4.62931	7.30253	8.94492	5.57751	12.452	4.48468	7.19268	6.7065	9.00041	12.0731	3.67735		0.0109622	0.00692479	0.00829348	0.0073083	0.00778674	0.0105195	0.00977728	0.0109006	0.0105783	0.0133408	0.0112528	0.00985451
790.489	H73 C40 N1 O12 P1	1.14ppm	PSOx2 34:2	0	0	0	8211.5	11485.3	12633.2	0	0	0	0	0	0	11755.6	PSOx2 34:2	0	0	0.163439	0.290916	0.231449	0	0	0	0	0	0	0.231011		0	0	0.000185618	0.000237688	0.000323126	0	0	0	0	0	0	0.00061906
846.551	H81 C44 N1 O12 P1	0.74ppm	PSOx2 38:2	0	1.14641e+07	5.94845e+06	6.37477e+06	5.23816e+06	4.81432e+06	1.01656e+07	4.39486e+06	8.22258e+06	4.82188e+06	6227132	1.02242e+07	2.19337e+06	PSOx2 38:2	230.615	81.7224	126.882	132.679	88.2018	189.303	76.488	131.564	105.03	135.866	173.923	43.1023		0.169708	0.122245	0.144099	0.108404	0.123138	0.159924	0.166756	0.199388	0.165667	0.201386	0.162106	0.115505
762.457	H69 C38 N1 O12 P1	0.67ppm	PSOx2 32:2	0	0	0	8818.5	58783.1	35160.6	12817.4	11877.5	0	10205.5	12133.1	34873	16951.9	PSOx2 32:2	0	0	0.175521	1.48894	0.644167	0.238684	0.206716	0	0.222296	0.264725	0.593222	0.333124		0	0	0.000199339	0.00121652	0.00089932	0.000201641	0.000450672	0	0.000350633	0.000392386	0.000552918	0.000892701
840.504	H75 C44 N1 O12 P1	0.87ppm	PSOx2 38:5	0	29549.7	70687.3	66464	134417	77976	92379.7	44949.9	33255.2	39936.1	31156.6	42402.9	57300.3	PSOx2 38:5	0.59443	0.971132	1.32288	3.4047	1.42858	1.72028	0.782308	0.532096	0.869887	0.679787	0.721313	1.12602		0.000437437	0.00145268	0.00150239	0.00278175	0.00199443	0.0014533	0.00170555	0.000806398	0.0013721	0.00100761	0.000672306	0.00301748
838.487	H73 C44 N1 O12 P1	-1.21ppm	PSOx2 38:6	0	0	0	14215.5	59383	32497.9	14921.4	0	0	0	12462.2	11248.8	17082.9	PSOx2 38:6	0	0	0.282941	1.50414	0.595385	0.277864	0	0	0	0.271905	0.191353	0.335699		0	0	0.000321336	0.00122893	0.000831215	0.00023474	0	0	0	0.000403029	0.000178352	0.0008996
844.535	H79 C44 N1 O12 P1	1.03ppm	PSOx2 38:3	82323.9	1.25593e+06	1.68032e+06	1.78011e+06	1.66835e+06	2.00542e+06	2.46652e+06	1.39324e+06	1.66167e+06	2.3109e+06	2.38808e+06	2.30213e+06	2.10099e+06	PSOx2 38:3	25.2647	23.085	35.4307	42.2584	36.7407	45.9312	24.248	26.5873	50.3359	52.1041	39.1615	41.2868		0.0185921	0.0345319	0.0402387	0.0345265	0.0512936	0.0388028	0.0528643	0.0402934	0.0793962	0.0772308	0.0365007	0.11064
872.566	H83 C46 N1 O12 P1	0.41ppm	PSOx2 40:3	0	166689	167310	177425	199517	140424	244146	104406	108351	117378	110914	198140	197788	PSOx2 40:3	3.35317	2.29858	3.53141	5.05365	2.57266	4.54646	1.81708	1.73365	2.55671	2.41996	3.37055	3.88677		0.00246757	0.00343835	0.00401062	0.004129	0.00359169	0.00384086	0.00396152	0.00262737	0.00403277	0.00358696	0.00314155	0.0104157
870.551	H81 C46 N1 O12 P1	0.62ppm	PSOx2 40:4	0	227203	305922	404321	359377	241653	357588	157742	216294	798223	142606	283562	208823	PSOx2 40:4	4.57049	4.20289	8.0475	9.10282	4.42726	6.65896	2.74533	3.46078	17.3869	3.11143	4.82365	4.10362		0.00336339	0.00628694	0.00913953	0.0074373	0.00618088	0.0056255	0.00598524	0.00524486	0.0274248	0.00461189	0.00449592	0.0109968
868.535	H79 C46 N1 O12 P1	0.82ppm	PSOx2 40:5	0	187882	1.16918e+06	1.13477e+06	1.05701e+06	1.05425e+06	1.20542e+06	747363	730260	622863	589607	1039099	640209	PSOx2 40:5	3.77949	16.0627	22.5862	26.7734	19.3146	22.4472	13.0071	11.6844	13.5672	12.8643	17.676	12.5808		0.0027813	0.0240275	0.0256511	0.0218748	0.0269651	0.0189634	0.0283575	0.0177079	0.0213999	0.0190679	0.0164751	0.033714
866.519	H77 C46 N1 O12 P1	0.47ppm	PSOx2 40:6	0	82932.8	87878	136545	135612	70026.4	115170	34772.2	49998.6	1147759	24915.2	1196159	144639	PSOx2 40:6	1.6683	1.20731	2.71775	3.43496	1.28293	2.14467	0.605175	0.799997	25.0004	0.543609	20.3478	2.84232		0.00122769	0.00180596	0.00308654	0.00280648	0.0017911	0.00181182	0.00131937	0.00121241	0.0394339	0.00080576	0.0189653	0.00761681
864.504	H75 C46 N1 O12 P1	0.80ppm	PSOx2 40:7	0	55398.6	121753	103584	104054	67189.5	40507.9	42767.6	63300.9	56413.6	918035	55137.2	43974.4	PSOx2 40:7	1.11441	1.67269	2.0617	2.63564	1.23096	0.754333	0.744327	1.01284	1.2288	20.03	0.937935	0.864147		0.000820089	0.00250211	0.00234147	0.00215341	0.00171854	0.000637262	0.00162275	0.00153497	0.00193822	0.0296894	0.00087421	0.00231573
862.487	H73 C46 N1 O12 P1	-0.34ppm	PSOx2 40:8	0	11581.9	8325.2	21751.9	0	13537	33065.3	17504.6	22126.8	7934.4	17041.5	41779.6	21024.5	PSOx2 40:8	0.232985	0.114375	0.432944	0	0.248008	0.615738	0.30465	0.354037	0.172827	0.371818	0.71071	0.413155		0.000171452	0.000171089	0.000491694	0	0.000346242	0.000520177	0.000664183	0.000536548	0.000272604	0.000551124	0.000662423	0.00110717
816.504	H75 C42 N1 O12 P1	1.48ppm	PSOx2 36:3	6361.8	80129.6	133566	137430	221260	167988	167973	81573.4	51481.3	277669	81745.2	1119214	122688	PSOx2 36:3	1.61191	1.83499	2.73538	5.60438	3.07766	3.12796	1.4197	0.823721	6.04818	1.78355	19.0389	2.41096		0.00118619	0.00274489	0.00310656	0.00457897	0.00429671	0.00264251	0.00309517	0.00124836	0.00953995	0.00264365	0.0177453	0.00646087
900.598	H87 C48 N1 O12 P1	0.46ppm	PSOx2 42:3	0	160660	273160	231131	244342	189925	488106	250841	319413	236565	258684	547307	80174.3	PSOx2 42:3	3.23189	3.75279	4.60036	6.18903	3.47956	9.08944	4.36564	5.11073	5.15284	5.64406	9.3102	1.57552		0.00237833	0.00561364	0.00522463	0.00505665	0.00485781	0.00767878	0.00951776	0.00774537	0.00812772	0.00836586	0.00867765	0.00422205
898.583	H85 C48 N1 O12 P1	1.28ppm	PSOx2 42:4	0	65629.6	50846.2	52027.4	121509	58124.1	70973.1	38203.8	145096	58930.1	111375	88189.5	38464.7	PSOx2 42:4	1.32022	0.698547	1.03554	3.07776	1.06488	1.32165	0.664898	2.3216	1.28361	2.43002	1.50019	0.755875		0.000971543	0.00104493	0.00117606	0.00251463	0.00148667	0.00111653	0.00144958	0.00351841	0.00202468	0.00360188	0.00139826	0.00202558
896.567	H83 C48 N1 O12 P1	1.00ppm	PSOx2 42:5	0	340596	175013	539101	242954	185735	245812	1.293e+06	324317	239399	219042	419168	242408	PSOx2 42:5	6.85151	2.4044	10.7301	6.15387	3.4028	4.57748	22.5034	5.18921	5.21459	4.77915	7.13045	4.76359		0.00504198	0.00359665	0.0121862	0.00502792	0.00475064	0.00386707	0.0490609	0.0078643	0.00822511	0.00708385	0.00664599	0.0127654
894.551	H81 C48 N1 O12 P1	1.18ppm	PSOx2 42:6	0	191660	244532	307080	251568	193826	210103	179549	204207	137720	98892.9	199977	194871	PSOx2 42:6	3.85548	3.35948	6.11204	6.37206	3.55103	3.91252	3.12487	3.2674	2.99982	2.15768	3.40179	3.82943		0.00283722	0.00502531	0.00694144	0.00520619	0.00495759	0.0033053	0.00681269	0.00495178	0.0047317	0.00319821	0.00317067	0.0102621
892.535	H79 C48 N1 O12 P1	0.79ppm	PSOx2 42:7	0	145112	1200592	416230	139658	700832	741958	342581	773187	427809	332285	680413	511943	PSOx2 42:7	2.91911	16.4942	8.28453	3.53745	12.8397	13.8166	5.96227	12.3713	9.31852	7.24993	11.5745	10.0603		0.00214815	0.0246731	0.00940873	0.00289021	0.0179255	0.0116723	0.0129987	0.0187488	0.0146983	0.0107461	0.0107881	0.0269594
890.519	H77 C48 N1 O12 P1	-0.20ppm	PSOx2 42:8	72630.9	165454	206812	294988	82889.8	221898	191676	174429	167598	1138218	1185113	275105	156764	PSOx2 42:8	3.32832	2.84128	5.87136	2.09955	4.06533	3.56937	3.03577	2.68163	24.7926	25.8573	4.6798	3.0806		0.00244929	0.00425015	0.0066681	0.0017154	0.0056756	0.00301541	0.00661843	0.00406404	0.0391061	0.0383267	0.00436184	0.00825534
###	PhosphatidylserineOx3
922.639	H93 C48 N1 O13 P1	-0.21ppm	PSOx3 42:0	0	0	0	0	0	0	0	0	0	0	0	0	0	PSOx3 42:0	0	0	0	0	0	0	0	0	0	0	0	0		0	0	0	0	0	0	0	0	0	0	0	0
808.496	H75 C40 N1 O13 P1	-2.02ppm	PSOx3 34:1	13407.7	0	0	0	0	0	0	0	0	0	0	0	0	PSOx3 34:1	0	0	0	0	0	0	0	0	0	0	0	0		0	0	0	0	0	0	0	0	0	0	0	0
918.607	H89 C48 N1 O13 P1	-0.95ppm	PSOx3 42:2	0	0	0	9813.7	0	10705.7	0	0	10923	0	0	0	0	PSOx3 42:2	0	0	0.195329	0	0.196136	0	0	0.174772	0	0	0	0		0	0	0.000221835	0	0.000273825	0	0	0.000264869	0	0	0	0
854.483	H73 C44 N1 O13 P1	0.53ppm	PSOx3 38:6	0	0	10192.7	14727.1	20983.6	9785.7	0	0	0	8705.6	7250.6	0	0	PSOx3 38:6	0	0.140032	0.293124	0.531502	0.179281	0	0	0	0.189625	0.158196	0	0		0	0.000209468	0.000332901	0.000434255	0.000250294	0	0	0	0.000299101	0.000234485	0	0
852.466	H71 C44 N1 O13 P1	-0.57ppm	PSOx3 38:7	0	10233.3	24438.8	44405.7	43264.6	21857.6	52533.5	14013.1	7569.4	8151	26476.8	29727.1	23485.9	PSOx3 38:7	0.205856	0.335751	0.883839	1.09587	0.400447	0.978272	0.243884	0.121113	0.177545	0.577681	0.505686	0.461525		0.000151488	0.000502236	0.00100377	0.00089536	0.000559063	0.000826446	0.000531704	0.000183549	0.000280046	0.000856263	0.000471328	0.00123679
882.515	H77 C46 N1 O13 P1	1.61ppm	PSOx3 40:6	0	0	0	0	20896	10316.6	0	0	0	0	0	0	9534.2	PSOx3 40:6	0	0	0	0.529284	0.189007	0	0	0	0	0	0	0.187358		0	0	0	0.000432442	0.000263873	0	0	0	0	0	0	0.000502079
880.499	H75 C46 N1 O13 P1	0.61ppm	PSOx3 40:7	0	0	0	0	37461.4	18804	0	0	0	7448	0	0	13563	PSOx3 40:7	0	0	0	0.948876	0.344503	0	0	0	0.162232	0	0	0.266528		0	0	0	0.000775263	0.000480959	0	0	0	0.000255893	0	0	0.000714239
878.482	H73 C46 N1 O13 P1	-0.26ppm	PSOx3 40:8	7834.8	0	10619.3	20806.7	0	0	0	0	0	0	9700.9	20410.9	18026.4	PSOx3 40:8	0	0.145892	0.414131	0	0	0	0	0	0	0.211658	0.347208	0.354239		0	0.000218235	0.000470328	0	0	0	0	0	0	0.000313728	0.000323618	0.000949286
826.45	H69 C42 N1 O13 P1	-1.61ppm	PSOx3 36:6	0	0	19838.4	42384.8	48376.4	18342	19347.4	20709.8	6059.8	33724.9	21103	11138.5	57853	PSOx3 36:6	0	0.272548	0.843615	1.22535	0.336039	0.360285	0.360433	0.0969592	0.734594	0.460433	0.189476	1.13688		0	0.000407694	0.000958093	0.00100115	0.000469142	0.000304369	0.0007858	0.000146943	0.0011587	0.000682473	0.000176603	0.00304659
830.484	H73 C42 N1 O13 P1	1.67ppm	PSOx3 36:4	0	0	0	0	0	0	0	0	0	807.9	0	7723.5	0	PSOx3 36:4	0	0	0	0	0	0	0	0	0.0175976	0	0.131384	0		0	0	0	0	0	0	0	0	2.77572e-05	0	0.000122457	0
906.513	H77 C48 N1 O13 P1	-1.12ppm	PSOx3 42:8	17257.8	26716.1	34319.4	80292.3	10294.2	52212.7	55269.6	47973.9	31185.1	21957.4	38835.3	47137.5	23341	PSOx3 42:8	0.537429	0.471494	1.59812	0.260746	0.956574	1.02922	0.834937	0.498974	0.478275	0.847324	0.801853	0.458677		0.00039549	0.000705289	0.00181498	0.000213038	0.00133547	0.00086949	0.00182029	0.000756201	0.000754396	0.00125594	0.000747373	0.00122916

## Sheet: LPS
																		Normalization													Normalization against PS
				0	Ctrl Mouse 1	Ctrl Mouse 2	Ctrl Mouse 3	Ctrl Mouse 4	Ctrl Mouse 5	Ctrl Mouse 6	Ctrl Mouse 7	Ctrl Mouse 8	Fento Mouse 1	Fento Mouse 2	Fento Mouse 3	Fento Mouse 4	PS in nmol	1358.89	668.512	880.515	1223.94	716.283	1183.71	458.683	659.843	633.984	674.654	1072.89	373.164
508.268	H43 C23 N1 O9 P1	-0.15ppm	LPS 17:1	1.48083e+07	7.17152e+06	7118257	6.69482e+06	4.05338e+06	6.85832e+06	6.57003e+06	7.62715e+06	9.18355e+06	6.60787e+06	8.29195e+06	6.99529e+06	7.06105e+06		Ctrl Mouse 1	Ctrl Mouse 2	Ctrl Mouse 3	Ctrl Mouse 4	Ctrl Mouse 5	Ctrl Mouse 6	Ctrl Mouse 7	Ctrl Mouse 8	Fento Mouse 1	Fento Mouse 2	Fento Mouse 3	Fento Mouse 4		Ctrl Mouse 1	Ctrl Mouse 2	Ctrl Mouse 3	Ctrl Mouse 4	Ctrl Mouse 5	Ctrl Mouse 6	Ctrl Mouse 7	Ctrl Mouse 8	Fento Mouse 1	Fento Mouse 2	Fento Mouse 3	Fento Mouse 4
496.268	H43 C22 N1 O9 P1	0.42ppm	LPS 16:0	0	104434	80061.7	93429.5	100672	87263.6	96181.9	36456.4	63042.5	160676	164437	176620	184192	LPS 16:0	0.436868	0.337421	0.418665	0.745093	0.381712	0.439185	0.143395	0.205941	0.729473	0.594928	0.757452	0.782569		0.000321488	0.000504735	0.000475477	0.000608766	0.000532908	0.000371024	0.000312622	0.000312107	0.00115062	0.000881826	0.00070599	0.00209712
524.299	H47 C24 N1 O9 P1	0.04ppm	LPS 18:0	9058.1	3.05113e+06	2.17934e+06	2161086	2.30357e+06	1.99741e+06	2977187	918758	1.51034e+06	1.31406e+06	1.4991e+06	1.99687e+06	1.29126e+06	LPS 18:0	12.7635	9.18488	9.68399	17.0492	8.73718	13.5944	3.61377	4.93386	5.9659	5.42369	8.56377	5.48613		0.00939259	0.0137393	0.0109981	0.0139298	0.012198	0.0114846	0.00787857	0.00747732	0.00941017	0.00803922	0.00798193	0.0147016
520.268	H43 C24 N1 O9 P1	-0.31ppm	LPS 18:2	0	67008.5	36534.5	43607.2	57709.5	115218	53682.1	37360.9	38196.2	58224.8	57003.2	67648.9	70517.8	LPS 18:2	0.280311	0.153975	0.195407	0.427121	0.503992	0.245123	0.146952	0.124776	0.264343	0.206236	0.290119	0.299606		0.000206279	0.000230325	0.000221924	0.000348972	0.000703622	0.00020708	0.000320379	0.000189099	0.000416955	0.000305691	0.000270408	0.00080288
552.331	H51 C26 N1 O9 P1	0.52ppm	LPS 20:0	0	261000	183574	235599	329709	181350	305012	95955	131870	250993	239104	229533	220762	LPS 20:0	1.09182	0.773675	1.05574	2.44025	0.79327	1.39274	0.377422	0.430782	1.13952	0.86507	0.984377	0.937943		0.000803461	0.00115731	0.001199	0.00199377	0.00110748	0.00117659	0.000822837	0.000652854	0.0017974	0.00128224	0.000917496	0.00251349
550.315	H49 C26 N1 O9 P1	0.45ppm	LPS 20:1	0	23356.5	19301.4	31260.5	28999.9	10718.6	32392.3	13454.2	21443.5	17872.3	31410.3	21709.3	11215.1	LPS 20:1	0.0977052	0.081346	0.140081	0.214635	0.0468858	0.147909	0.0529197	0.0700497	0.081141	0.113641	0.0931025	0.0476491		7.19006e-05	0.000121682	0.000159089	0.000175364	6.54571e-05	0.000124954	0.000115373	0.000106161	0.000127986	0.000168444	8.6777e-05	0.000127689
548.3	H47 C26 N1 O9 P1	1.16ppm	LPS 20:2	0	0	0	0	7196.8	6292.6	0	0	0	0	4199.9	8033.2	5352.1	LPS 20:2	0	0	0	0.0532652	0.0275254	0	0	0	0	0.0151951	0.0344512	0.0227392		0	0	0	4.35194e-05	3.84281e-05	0	0	0	0	2.25228e-05	3.21105e-05	6.09363e-05
544.268	H43 C26 N1 O9 P1	-0.45ppm	LPS 20:4	0	48675.5	34445.2	43338.1	78706.3	83414.6	63307.7	29929.8	34098.8	44210.4	45913.9	47170.7	45230.3	LPS 20:4	0.20362	0.14517	0.194201	0.582523	0.364876	0.289075	0.117723	0.111391	0.200717	0.166115	0.202296	0.192168		0.000149843	0.000217154	0.000220554	0.000475941	0.000509402	0.000244211	0.000256655	0.000168814	0.000316596	0.000246222	0.000188552	0.000514969
580.362	H55 C28 N1 O9 P1	0.32ppm	LPS 22:0	0	1.26309e+06	985226	1.11723e+06	1.91553e+06	1.07759e+06	1.48893e+06	615918	624940	910407	863354	2.16356e+06	785107	LPS 22:0	5.28376	4.15225	5.0064	14.1773	4.71362	6.79873	2.4226	2.0415	4.13328	3.12359	9.27862	3.33565		0.00388828	0.00621118	0.00568576	0.0115833	0.00658067	0.00574358	0.00528164	0.00309391	0.00651954	0.00462991	0.00864822	0.00893883
578.346	H53 C28 N1 O9 P1	0.21ppm	LPS 22:1	0	284843	261019	268789	366146	211247	279983	113576	132086	277873	264946	218126	257135	LPS 22:1	1.19156	1.10007	1.20446	2.70993	0.924045	1.27845	0.446729	0.431487	1.26155	0.958566	0.935454	1.09248		0.00087686	0.00164555	0.00136791	0.0022141	0.00129006	0.00108004	0.000973938	0.000653924	0.00198988	0.00142083	0.000871898	0.00292761
576.33	H51 C28 N1 O9 P1	-0.70ppm	LPS 22:2	0	0	0	0	16974	12738.3	11838.3	0	0	0	7747.4	7242.6	0	LPS 22:2	0	0	0	0.125628	0.0557205	0.0540559	0	0	0	0.0280298	0.0310606	0		0	0	0	0.000102643	7.77912e-05	4.56665e-05	0	0	0	4.1547e-05	2.89503e-05	0
572.299	H47 C28 N1 O9 P1	-0.14ppm	LPS 22:4	0	23852.7	6400.7	0	0	9581.7	18699.4	0	6262.4	8826.9	12338.9	0	8585.7	LPS 22:4	0.0997809	0.0269758	0	0	0.0419127	0.085385	0	0.0204574	0.0400745	0.0446417	0	0.0364777		7.34281e-05	4.03521e-05	0	0	5.85142e-05	7.21334e-05	0	3.10035e-05	6.32106e-05	6.61698e-05	0	9.77524e-05
570.283	H45 C28 N1 O9 P1	-0.83ppm	LPS 22:5	0	6613.2	0	9971.9	11220	10956.6	24901.2	10995.4	7677.4	14535.7	10180.3	35765.8	15701.9	LPS 22:5	0.0276644	0	0.0446848	0.0830418	0.0479269	0.113704	0.0432484	0.0250798	0.0659927	0.036832	0.153385	0.066712		2.03581e-05	0	5.07485e-05	6.78479e-05	6.69105e-05	9.6057e-05	9.42882e-05	3.80088e-05	0.000104092	5.45939e-05	0.000142964	0.000178774
568.268	H43 C28 N1 O9 P1	0.37ppm	LPS 22:6	5858.2	57198.5	49445.7	66472.1	53847.9	73558.9	28515	19032.7	46070.3	29507.5	17915	42167.2	36415.2	LPS 22:6	0.239274	0.20839	0.297866	0.398541	0.321765	0.130205	0.0748617	0.150498	0.133965	0.0648158	0.180838	0.154716		0.00017608	0.000311722	0.000338287	0.000325621	0.000449215	0.000109997	0.00016321	0.000228082	0.000211307	9.60727e-05	0.000168552	0.000414605

## Sheet: PI and PIOx
																		Normalizatioon												Normalization against PI
				0	Ctrl Mouse 1	Ctrl Mouse 2	Ctrl Mouse 3	Ctrl Mouse 4	Ctrl Mouse 5	Ctrl Mouse 6	Ctrl Mouse 7	Ctrl Mouse 8	Fento Mouse 1	Fento Mouse 2	Fento Mouse 3	Fento Mouse 4	PI in nmol	1355.29	1494.65	2472.37	1600.21	1694.03	635.263	523.486	872.361	617.013	1109.72	960.045																	Lipo 1			PDAC 1
809.519	H78 C41 O13 P1	0.80ppm	PI 32:0	6792979	2.31204e+06	2.77981e+06	2006327	1.44273e+06	2.26909e+06	2.19968e+06	2.80675e+06	3.33016e+06	2.2594e+06	2.68671e+06	2.46014e+06	2.54462e+06		Ctrl Mouse 1	Ctrl Mouse 2	Ctrl Mouse 3	Ctrl Mouse 4	Ctrl Mouse 5	Ctrl Mouse 6	Ctrl Mouse 7	Ctrl Mouse 8	Fento Mouse 1	Fento Mouse 2	Fento Mouse 3	Fento Mouse 4	Ctrl Mouse 1	Ctrl Mouse 2	Ctrl Mouse 3	Ctrl Mouse 4	Ctrl Mouse 5	Ctrl Mouse 6	Ctrl Mouse 7	Ctrl Mouse 8	Fento Mouse 1	Fento Mouse 2	Fento Mouse 3	Fento Mouse 4				1	2	3	4	5
837.549	H82 C43 O13 P1	-0.43ppm	PI 34:0	0	39711	101419	125409	42799.5	57246.8	117818	44397.7	73921.8	30063.5	38321.2	94924.4	27912	PI 34:0	1.82421	3.12533	1.48328	1.26145	2.67806	0.790908	1.10988	0.665298	0.713162	1.92925	0.548452		0.000865968	0.00134599	0.00209101	0.000599944	0.0007883	0.00158089	0.00124501	0.00212018	0.00076264	0.00115583	0.0017385	0.000571277			MUFA	0.0342847	0.0332464	0.0344114	0.190254	0.20024
865.581	H86 C45 O13 P1	0.15ppm	PI 36:0	0	0	0	28841.5	412970	0	147150	33567.6	0	277257	0	20758.1	320547	PI 36:0	-3.05777e-05	0.718764	14.3121	-3.74599e-05	3.34479	0.597979	-2.55243e-05	6.13563	-3.16372e-05	0.421888	6.29853		-3.70715e-08	-2.25616e-08	0.000480891	0.00578882	-2.34093e-08	0.00197446	0.00094131	-4.87583e-08	0.00703336	-5.12748e-08	0.000380176	0.00656066			MUFA Ox	0.000176703	0.000402132	0.000239868	0.000118163	0.000318383
893.612	H90 C47 O13 P1	-0.88ppm	PI 38:0	0	229980	306234	273268	324089	228826	249658	175931	156589	181705	151457	209214	185283	PI 38:0	5.50819	6.81017	11.2318	5.04223	5.67486	3.13407	2.35107	4.02108	2.81864	4.25208	3.64068		0.00501512	0.0040642	0.00455636	0.00454293	0.00315098	0.00334992	0.00493351	0.00449118	0.00460943	0.00456819	0.00383167	0.0037922			Sum	0.0344614	0.0336485	0.0346513	0.190372	0.200559
835.535	H80 C43 O13 P1	0.51ppm	PI 34:1	0	1.28065e+06	2.09335e+06	1.9859e+06	1.63289e+06	1.45837e+06	1.43406e+06	956033	1.27579e+06	717648	633192	1.21435e+06	738008	PI 34:1	37.6527	49.4909	56.5903	32.1356	32.597	17.0309	19.1552	15.8814	11.7838	24.6805	14.5014		0.0279269	0.027782	0.033112	0.0228891	0.0200821	0.0192423	0.0268093	0.0365915	0.018205	0.0190981	0.0222404	0.0151049			% MUFA Ox	0.00512756	0.011951	0.00692235	0.000620696	0.00158748
863.566	H84 C45 O13 P1	0.79ppm	PI 36:1	0	1.02953e+06	1.1196e+06	1.0008e+06	1.30397e+06	1.60772e+06	1.50746e+06	655361	759535	700895	780859	1309159	794607	PI 36:1	20.1381	24.9411	45.191	35.4265	34.2653	11.6747	11.4039	15.5106	14.5319	26.6074	15.6135		0.0224507	0.0148588	0.0166869	0.0182784	0.0221386	0.0202271	0.0183778	0.0217845	0.0177801	0.023552	0.0239767	0.0162633				1	2.33073	1.35003	1	2.55758
891.597	H88 C47 O13 P1	0.27ppm	PI 38:1	0	106070	149546	124721	154871	61366.3	98502.7	43344.4	83099.4	51103.4	39254.4	61054.9	45868.9	PI 38:1	2.68986	3.10819	5.36729	1.35222	2.23902	0.772145	1.24768	1.13091	0.730529	1.24088	0.901292		0.00231305	0.0019847	0.00207955	0.00217091	0.000845026	0.00132171	0.00121547	0.0023834	0.00129637	0.00118398	0.0011182	0.000938802				0	1.22078	0.43299	0	1.35478
807.503	H76 C41 O13 P1	0.50ppm	PI 32:1	0	98167.5	157211	91104.9	110051	79312.4	100270	47184.8	92847.8	53366	8357.7	77539.8	47581	PI 32:1	2.82773	2.27044	3.814	1.74767	2.27919	0.840558	1.39404	1.18098	0.155538	1.57592	0.934934		0.00214071	0.00208643	0.00151904	0.00154265	0.00109215	0.00134543	0.00132317	0.002663	0.00135377	0.000252082	0.00142011	0.000973844
833.519	H78 C43 O13 P1	1.18ppm	PI 34:2	0	334035	551183	362337	462487	563660	540731	273386	253852	263122	263276	361912	307757	PI 34:2	9.91406	9.02987	16.0282	12.4204	12.2911	4.87015	3.8114	5.82282	4.89961	7.35552	6.04721		0.00728421	0.00731506	0.00604146	0.00648294	0.00776171	0.00725555	0.00766636	0.00728081	0.00667479	0.00794085	0.00662828	0.00629888			PUFA	0.914456	0.914755	0.917207	0.620166	0.601948
861.551	H82 C45 O13 P1	0.74ppm	PI 36:2	0	2048605	3.78274e+06	2.51616e+06	3.62198e+06	5.17897e+06	4.17831e+06	1869057	1.39484e+06	1993497	1.75531e+06	2.80959e+06	2.5689e+06	PI 36:2	68.0397	62.7057	125.525	114.12	94.9752	33.2957	20.9425	44.1156	32.6666	57.1021	50.4772		0.0446734	0.0502029	0.0419534	0.0507713	0.0713155	0.0560647	0.0524125	0.0400058	0.0505703	0.0529431	0.0514565	0.0525779			PUFA Ox	0.00655713	0.00854984	0.00576198	0.00311409	0.00540063
889.582	H86 C47 O13 P1	0.76ppm	PI 38:2	0	175511	231558	253047	316068	262523	214138	147990	142070	141863	88700.4	172916	119433	PI 38:2	4.16501	6.30622	10.9538	5.78475	4.86747	2.63632	2.13309	3.13939	1.65073	3.51434	2.34678		0.00382732	0.00307314	0.00421919	0.0044305	0.00361499	0.00287331	0.00414997	0.00407477	0.00359872	0.00267535	0.00316688	0.00244445			Sum	0.921013	0.923305	0.922969	0.623281	0.607349
917.612	H90 C49 O13 P1	0.03ppm	PI 40:2	0	0	0	0	0	0	0	0	0	0	0	0	0	PI 40:2	0	0	0	0	0	0	0	0	0	0	0		0	0	0	0	0	0	0	0	0	0	0	0			% PUFA Ox	0.00711948	0.00926004	0.00624288	0.00499629	0.00889215
805.488	H74 C41 O13 P1	1.19ppm	PI 32:2	0	0	0	0	0	0	0	0	0	0	0	0	0	PI 32:2	0	0	0	0	0	0	0	0	0	0	0		0	0	0	0	0	0	0	0	0	0	0	0				1	1.30066	0.876873	1	1.77975
859.535	H80 C45 O13 P1	0.75ppm	PI 36:3	0	548804	921817	655008	794368	961562	949313	473555	299196	366609	427472	511081	420154	PI 36:3	16.5806	16.3236	27.53	21.1882	21.5784	8.43599	4.49221	8.11297	7.9553	10.3872	8.25575		0.0119676	0.0122339	0.0109213	0.0111351	0.0132409	0.0127379	0.0132795	0.00858134	0.00930001	0.0128932	0.00936024	0.00859933				0	0.379247	-0.189561	0	0.831673
831.502	H76 C43 O13 P1	-0.66ppm	PI 34:3	0	0	0	0	42.3	0	0	0	961.8	0	0	0	0	PI 34:3	-3.05777e-05	-4.2366e-05	0.00146597	-3.74599e-05	-3.86419e-05	-3.02841e-05	0.0144408	-3.76206e-05	-3.16372e-05	-3.45508e-05	-3.34038e-05		-3.70715e-08	-2.25616e-08	-2.83451e-08	5.92942e-07	-2.34093e-08	-2.28107e-08	-4.76718e-08	2.75857e-05	-4.3125e-08	-5.12748e-08	-3.11348e-08	-3.4794e-08
857.519	H78 C45 O13 P1	0.87ppm	PI 36:4	30414.3	1.56062e+06	2699017	1.86566e+06	2.30344e+06	1.96194e+06	2.04277e+06	1.0896e+06	1.31789e+06	1.15422e+06	1005353	1.70815e+06	1.46833e+06	PI 36:4	48.5469	46.4944	79.8291	43.2317	46.4331	19.4103	19.7872	25.5426	18.7097	34.7164	28.8516		0.0340321	0.0358202	0.0311072	0.0322885	0.0270163	0.0274099	0.0305548	0.0377989	0.0292798	0.0303231	0.031284	0.0300524
887.567	H84 C47 O13 P1	1.40ppm	PI 38:3	0	5.51669e+06	8.02624e+06	7.49195e+06	9.27093e+06	9.07253e+06	1.00186e+07	3.67582e+06	4.66317e+06	4.59993e+06	3.95261e+06	5.45735e+06	5.71403e+06	PI 38:3	144.367	186.708	321.298	199.915	227.729	65.4817	70.0142	101.795	73.5585	110.915	112.277		0.120301	0.106521	0.124918	0.129956	0.124931	0.13443	0.103078	0.133746	0.116689	0.119217	0.0999491	0.116949
885.551	H82 C47 O13 P1	0.71ppm	PI 38:4	0	2.92233e+07	4.82709e+07	3.86012e+07	4.5376e+07	4.66289e+07	4.76046e+07	2.3565e+07	2.12604e+07	26366016	2.17501e+07	36522976	3.3091e+07	PI 38:4	868.242	961.986	1572.57	1027.48	1082.08	419.791	319.21	583.473	404.773	742.294	650.216		0.637265	0.64063	0.643619	0.636059	0.64209	0.638761	0.660816	0.609777	0.668844	0.65602	0.668904	0.677276
883.535	H80 C47 O13 P1	0.93ppm	PI 38:5	0	1366820	2.7517e+06	2.09614e+06	2.35807e+06	1.63285e+06	2.23818e+06	1.09627e+06	1.21158e+06	959447	877900	1.42798e+06	1.2649e+06	PI 38:5	49.4945	52.2382	81.7224	35.9802	50.8751	19.5292	18.1911	21.2323	16.3378	29.0222	24.8543		0.0298059	0.0365194	0.0349501	0.0330543	0.0224847	0.030032	0.030742	0.0347498	0.0243389	0.0264789	0.0261528	0.0258887
881.519	H78 C47 O13 P1	1.11ppm	PI 38:6	0	281036	404953	203955	234034	179943	234516	119714	240620	142702	155850	308883	106539	PI 38:6	7.28383	5.08281	8.11081	3.96508	5.33068	2.13261	3.61273	3.15796	2.9004	6.27776	2.09342		0.00612848	0.00537435	0.00340066	0.00328059	0.00247785	0.00314675	0.00335705	0.0069013	0.00362001	0.0047007	0.00565708	0.00218054
855.504	H76 C45 O13 P1	1.43ppm	PI 36:5	0	33682.1	55792.1	31187.5	48893.4	0	10219	15737.5	38059.6	15780.3	5973.9	39264.6	25261.9	PI 36:5	1.00353	0.777229	1.69447	0	0.232283	0.280351	0.571438	0.349214	0.111175	0.798015	0.496379		0.000734497	0.000740448	0.000520007	0.000685365	0	0.000137119	0.000441315	0.0010916	0.000400309	0.000180183	0.000719115	0.000517037
913.582	H86 C49 O13 P1	1.41ppm	PI 40:4	7193.3	622864	1.06653e+06	752466	995196	1246185	1.20246e+06	564865	428920	565170	483078	822650	778985	PI 40:4	19.1835	18.7523	34.49	27.46	27.3327	10.0626	6.43993	12.5071	8.99014	16.7196	15.3065		0.0135826	0.0141545	0.0125463	0.0139502	0.0171602	0.0161347	0.0158401	0.012302	0.014337	0.0145704	0.0150665	0.0159435
911.567	H84 C49 O13 P1	1.08ppm	PI 40:5	0	467972	866009	591564	717092	579170	675154	337386	373168	327158	277816	498047	401559	PI 40:5	15.5768	14.7425	24.8519	12.7621	15.3466	6.01025	5.60286	7.23992	5.17018	10.1223	7.89036		0.010205	0.0114933	0.00986348	0.0100519	0.00797529	0.00905925	0.00946105	0.010703	0.00829923	0.00837937	0.00912154	0.00821874
909.551	H82 C49 O13 P1	0.94ppm	PI 40:6	0	843546	1673446	895846	810785	813804	903094	476282	759995	512732	443566	929552	424334	PI 40:6	30.1001	22.3255	28.099	17.9323	20.5278	8.48457	11.4108	11.3466	8.25483	18.8922	8.33787		0.018395	0.0222092	0.0149369	0.0113652	0.0112062	0.0121178	0.013356	0.0217977	0.0130068	0.0133787	0.0170244	0.00868487
907.535	H80 C49 O13 P1	0.53ppm	PI 40:7	0	24416.8	97241.6	28624.6	38894.5	33110.3	37338.5	0	10883.6	0	6388.5	26602.6	0	PI 40:7	1.74907	0.713358	1.34795	0.729593	0.848724	0	0.16341	0	0.118891	0.540672	0		0.000532451	0.00129055	0.000477274	0.000545205	0.000455936	0.00050101	0	0.000312156	0	0.000192688	0.000487216	0
905.52	H78 C49 O13 P1	1.28ppm	PI 40:8	0	25335.5	22649.2	0	9311.9	12539.9	22092.1	0	28478.1	0	9828.9	17305.8	7971.7	PI 40:8	0.407388	0	0.322718	0.276319	0.502165	0	0.427579	0	0.182917	0.351724	0.156638		0.000552485	0.00030059	0	0.00013053	0.000172677	0.000296433	0	0.000816791	0	0.000296456	0.000316949	0.000163157
943.629	H92 C51 O13 P1	0.99ppm	PI 42:3	0	0	0	0	0	0	0	0	0	0	0	0	0	PI 42:3	0	0	0	0	0	0	0	0	0	0	0		0	0	0	0	0	0	0	0	0	0	0	0
941.614	H90 C51 O13 P1	1.09ppm	PI 42:4	0	0	0	0	0	0	0	0	0	0	0	0	0	PI 42:4	0	0	0	0	0	0	0	0	0	0	0		0	0	0	0	0	0	0	0	0	0	0	0
939.598	H88 C51 O13 P1	1.45ppm	PI 42:5	0	0	0	0	0	0	0	0	0	0	0	0	0	PI 42:5	0	0	0	0	0	0	0	0	0	0	0		0	0	0	0	0	0	0	0	0	0	0	0
937.582	H86 C51 O13 P1	1.38ppm	PI 42:6	0	0	0	0	0	0	0	0	0	0	0	0	0	PI 42:6	0	0	0	0	0	0	0	0	0	0	0		0	0	0	0	0	0	0	0	0	0	0	0
###	PhosphatidylinositolOx1
851.529	H80 C43 O14 P1	-0.11ppm	PIOx1 34:1	0	0	0	0	-1.7	-1.7	0	0	0	-1.7	0	0	0	PIOx1 34:1	0	0	-5.8916e-05	-3.74599e-05	0	0	0	-3.76206e-05	0	0	0		0	0	0	-2.38298e-08	-2.34093e-08	0	0	0	-4.3125e-08	0	0	0
849.512	H78 C43 O14 P1	-1.45ppm	PIOx1 34:2	0	0	13140	20792.4	9991.5	9716.1	0	0	0	9469.7	0	11031.2	0	PIOx1 34:2	0.236347	0.518171	0.34627	0.214096	0	0	0	0.209562	0	0.224198	0		0	0.000174388	0.000346683	0.000140056	0.000133793	0	0	0	0.000240224	0	0.000202032	0
877.544	H82 C45 O14 P1	-0.38ppm	PIOx1 36:2	0	0	11435.7	15652.7	11534.2	19899.8	45818.6	0	0	21148	0	0	18889.4	PIOx1 36:2	0.205692	0.390083	0.399735	0.438497	1.04148	0	0	0.468	0	0	0.371164		0	0.00015177	0.000260986	0.000161681	0.000274024	0.000614796	0	0	0.000536475	0	0	0.000386611
845.481	H74 C43 O14 P1	-1.22ppm	PIOx1 34:4	0	0	0	0	11489	16975.6	0	0	0	0	0	0	18210.9	PIOx1 34:4	0	0	0.398168	0.374061	0	0	0	0	0	0	0.357832		0	0	0	0.000161048	0.000233757	0	0	0	0	0	0	0.000372724
903.56	H84 C47 O14 P1	-0.36ppm	PIOx1 38:3	0	0	0	0	47613.9	23967.2	45473.5	13567.4	0	0	0	0	32676.3	PIOx1 38:3	0	0	1.65013	0.528123	1.03364	0.241692	0	0	0	0	0.642067		0	0	0	0.00066743	0.000330033	0.000610165	0.00038046	0	0	0	0	0.000668788
901.546	H82 C47 O14 P1	0.87ppm	PIOx1 38:4	0	210004	458733	422954	667606	469419	623504	243901	134765	342610	229073	585383	480829	PIOx1 38:4	8.25118	10.5405	23.1369	10.3438	14.1726	4.34489	2.0234	7.58187	4.26308	11.8973	9.44796		0.0045795	0.0060881	0.00705215	0.0093582	0.006464	0.0083662	0.00683952	0.00386523	0.00869121	0.00690922	0.0107211	0.00984116
899.53	H80 C47 O14 P1	0.56ppm	PIOx1 38:5	0	65906	210754	216648	270256	194952	285842	108648	30962.3	154495	113400	200390	260886	PIOx1 38:5	3.7908	5.39911	9.36613	4.2958	6.49735	1.93547	0.464877	3.41893	2.11038	4.07272	5.12623		0.0014372	0.00279703	0.00361229	0.00378833	0.00268452	0.00383545	0.00304673	0.000888041	0.00391917	0.00342032	0.00367005	0.00533957
###	PhosphatidylinositolOx2
925.602	H90 C47 O15 P1	-0.68ppm	PIOx2 38:0	0	32442.8	9131.2	0	0	10376.3	0	0	8444.1	0	0	12075.9	0	PIOx2 38:0	0.164242	0	0	0.228644	0	0	0.126782	0	0	0.245431	0		0.000707472	0.000121185	0	0	0.000142884	0	0	0.000242188	0	0	0.000221165	0
867.523	H80 C43 O15 P1	-1.73ppm	PIOx2 34:1	0	0	0	0	0	0	0	0	0	0	0	0	0	PIOx2 34:1	0	0	0	0	0	0	0	0	0	0	0		0	0	0	0	0	0	0	0	0	0	0	0
923.586	H88 C47 O15 P1	-1.23ppm	PIOx2 38:1	0	13215.8	8901	0	0	0	0	0	0	0	0	10294.6	0	PIOx2 38:1	0.160101	0	0	0	0	0	0	0	0	0.209228	0		0.000288194	0.00011813	0	0	0	0	0	0	0	0	0.000188541	0
921.571	H86 C47 O15 P1	-0.14ppm	PIOx2 38:2	0	30543.8	0	0	5386.4	0	1765.5	0	7418.4	0	0	0	0	PIOx2 38:2	0	0	0.186674	0	0.0401308	0	0.111382	0	0	0	0		0.000666061	0	0	7.55041e-05	0	2.36896e-05	0	0.00021277	0	0	0	0
889.509	H78 C45 O15 P1	0.98ppm	PIOx2 36:4	0	0	11651.8	44858.1	68257	14440.6	23319.2	0	0	8128	9189.9	0	23525.3	PIOx2 36:4	0.209579	1.11792	2.36555	0.318202	0.530058	0	0	0.179871	0.171025	0	0.462256		0	0.000154638	0.000747944	0.000956795	0.00019885	0.000312898	0	0	0.000206188	0.000277182	0	0.000481494
891.523	H80 C45 O15 P1	-1.68ppm	PIOx2 36:3	2827.5	1043.2	18258.8	2843.5	40267.6	4843.1	27782.5	-1.7	14126	13907.1	1431.5	0	43586.6	PIOx2 36:3	0.328419	0.0708633	1.39553	0.106719	0.631511	-3.02841e-05	0.212092	0.307761	0.0266404	0	0.856447		2.27488e-05	0.000242323	4.74113e-05	0.000564453	6.66905e-05	0.000372787	-4.76718e-08	0.000405153	0.00035279	4.31764e-05	0	0.00089209
919.556	H84 C47 O15 P1	0.25ppm	PIOx2 38:3	0	0	40941.7	0	87671.8	50805	51227.8	0	0	32713.7	0	0	25559.5	PIOx2 38:3	0.736413	0	3.0384	1.1195	1.16444	0	0	0.723946	0	0	0.502227		0	0.00054336	0	0.00122894	0.000699595	0.000687377	0	0	0.00082987	0	0	0.000523128
917.54	H82 C47 O15 P1	0.93ppm	PIOx2 38:4	0	214938	462151	518470	133764	550905	677168	269989	134525	588325	554290	468342	600010	PIOx2 38:4	8.31264	12.9209	4.6358	12.1393	15.3924	4.80964	2.01979	13.0195	10.3154	9.5186	11.7898		0.0046871	0.00613346	0.00864475	0.00187505	0.00758607	0.00908627	0.0075711	0.00385835	0.0149244	0.0167183	0.0085775	0.0122804
915.525	H80 C47 O15 P1	1.05ppm	PIOx2 38:5	0	0	112490	101761	79905.3	84592.6	135656	40126.5	8672.9	68643	95881.6	148232	95173.8	PIOx2 38:5	2.02335	2.536	2.76924	1.86402	3.08352	0.714821	0.130218	1.51905	1.78437	3.01267	1.8701		0	0.00149292	0.00169672	0.00112008	0.00116486	0.00182023	0.00112524	0.000248751	0.00174131	0.00289195	0.00271481	0.00194793
947.588	H88 C49 O15 P1	1.94ppm	PIOx2 40:3	0	67123.9	10143.5	45468.5	0	0	10085.2	0	17910.6	15609.1	33273.5	24361.2	0	PIOx2 40:3	0.18245	1.13313	0	0	0.229242	0	0.268915	0.345425	0.619224	0.495118	0		0.00146375	0.00013462	0.000758122	0	0	0.000135324	0	0.0005137	0.000395966	0.00100358	0.000446166	0
967.554	H84 C51 O15 P1	-1.76ppm	PIOx2 42:7	0	166392	174421	94911.4	119471	147774	183953	67651.7	71858.8	100079	163942	112410	106212	PIOx2 42:7	3.13729	2.3653	4.14044	3.25623	4.18134	1.20516	1.07891	2.21473	3.05098	2.28463	2.08699		0.00362848	0.00231484	0.00158251	0.00167469	0.00203488	0.00246829	0.0018971	0.00206101	0.00253878	0.00494476	0.00205875	0.00217384
																		0	0	0	0	0	0	0	0	0	0	0
###	PhosphatidylinositolOx3																	0	0	0	0	0	0	0	0	0	0	0
905.505	H78 C45 O16 P1	1.46ppm	PIOx3 36:4	0	0	17597.4	28922.5	25340.4	0	9102.6	10417.9	0	9207.7	11669.1	0	18361.1	PIOx3 36:4	0.316522	0.720782	0.878209	0	0.206907	0.185586	0	0.203764	0.217163	0	0.360783		0	0.000233545	0.000482241	0.00035521	0	0.000122139	0.000292141	0	0.000233578	0.000351959	0	0.000375798
935.552	H84 C47 O16 P1	1.50ppm	PIOx3 38:3	0	11661.3	57038.6	45957.7	27209.1	74109.4	110749	27948	14040.3	67132.2	21361.6	147887	61998.6	PIOx3 38:3	1.02595	1.14532	0.942972	1.63302	2.51738	0.497871	0.210805	1.48562	0.397542	3.00566	1.21823		0.000254295	0.000756991	0.000766279	0.000381405	0.0010205	0.00148603	0.000783724	0.000402695	0.00170299	0.000644301	0.00270849	0.00126893
933.536	H82 C47 O16 P1	1.11ppm	PIOx3 38:4	0	290415	628309	570978	104705	569862	652039	367714	268933	470812	317718	415799	637308	PIOx3 38:4	11.3013	14.2294	3.6287	12.557	14.8212	6.55053	4.03784	10.419	5.91277	8.45071	12.5227		0.00633301	0.00833864	0.00952025	0.0014677	0.00784711	0.00874908	0.0103115	0.00771335	0.0119434	0.00958289	0.00761519	0.0130438
931.52	H80 C47 O16 P1	0.98ppm	PIOx3 38:5	0	49794.2	290894	342092	162939	288707	390998	153212	37861.1	192454	123503	223441	342862	PIOx3 38:5	5.23228	8.52533	5.6469	6.36173	8.8876	2.72935	0.568458	4.25895	2.29841	4.54122	6.73701		0.00108585	0.00386062	0.00570389	0.00228401	0.00397556	0.00524643	0.00429642	0.00108591	0.0048821	0.00372505	0.00409223	0.00701739
929.504	H78 C47 O16 P1	1.20ppm	PIOx3 38:6	0	0	16216.6	26247.3	54619.9	0	14557.4	0	0	0	0	0	0	PIOx3 38:6	0.291686	0.654113	1.89293	0	0.330897	0	0	0	0	0	0		0	0.000215219	0.000437636	0.000765637	0	0.000195332	0	0	0	0	0	0
981.535	H82 C51 O16 P1	0.17ppm	PIOx3 42:8	0	9261.2	0	0	79513	9924.2	15504.2	0	0	0	0	0	9093.5	PIOx3 42:8	0	0	2.75564	0.218682	0.352419	0	0	0	0	0	0.178681		0.000201957	0	0	0.00111458	0.000136658	0.000208036	0	0	0	0	0	0.000186117
																		0	0	0	0	0	0	0	0	0	0	0
																		0	0	0	0	0	0	0	0	0	0	0
###	PhosphatidylinositolOx4																	0	0	0	0	0	0	0	0	0	0	0
951.547	H84 C47 O17 P1	1.85ppm	PIOx4 38:3	0	0	22723.9	29909.9	115318	0	74749.5	0	0	19655.1	0	0	26435.8	PIOx4 38:3	0.408732	0.745389	3.99652	0	1.6991	0	0	0.434962	0	0	0.519445		0	0.000301581	0.000498705	0.00161648	0	0.00100299	0	0	0.000498604	0	0	0.000541063
949.53	H82 C47 O17 P1	0.92ppm	PIOx4 38:4	5254.8	83076.3	276197	279556	156424	334777	437478	136565	58067.5	187998	110264	221678	296458	PIOx4 38:4	4.96792	6.96687	5.42111	7.37688	9.94411	2.43279	0.871843	4.16034	2.05203	4.50539	5.8252		0.00181162	0.00366557	0.0046612	0.00219268	0.00460994	0.0058701	0.00382959	0.00166545	0.00476906	0.00332576	0.00405994	0.00606763
947.514	H80 C47 O17 P1	0.54ppm	PIOx4 38:5	0	8666.7	79871.9	84508.3	196280	66314.7	136457	17477.7	0	83410.3	31502.7	70709.3	92199.2	PIOx4 38:5	1.43665	2.10605	6.80236	1.46126	3.10175	0.311351	0	1.84585	0.586269	1.4371	1.81165		0.000188993	0.00106002	0.00140905	0.00275136	0.000913167	0.00183099	0.000490114	0	0.00211592	0.000950173	0.00129501	0.00188705
																		0	0	0	0	0	0	0	0	0	0	0
																		0	0	0	0	0	0	0	0	0	0	0
###	PhosphatidylinositolOx5																	0	0	0	0	0	0	0	0	0	0	0
967.542	H84 C47 O18 P1	1.81ppm	PIOx5 38:3	0	0	13136.3	14081.1	60906.1	27095.2	30421.8	0	0	8365.3	0	0	23150.1	PIOx5 38:3	0.236281	0.350917	2.11079	0.597049	0.691504	0	0	0.185122	0	0	0.454884		0	0.000174339	0.000234782	0.000853754	0.000373106	0.000408201	0	0	0.000212208	0	0	0.000473815
965.525	H82 C47 O18 P1	0.86ppm	PIOx5 38:4	0	0	87660	147487	242393	119108	143587	30886.2	0	82247.7	24905.6	62723.3	120820	PIOx5 38:4	1.57673	3.67556	8.40048	2.62458	3.2638	0.550212	0	1.82012	0.463496	1.27479	2.37404		0	0.00116338	0.00245914	0.00339775	0.00164015	0.00192665	0.000866118	0	0.00208643	0.000751194	0.00114875	0.00247284
963.51	H80 C47 O18 P1	0.94ppm	PIOx5 38:5	0	0	72437.3	66823.3	167358	47658.6	94146.3	9123.3	0	34198.2	16443	31539.5	66143.9	PIOx5 38:5	1.30292	1.66531	5.80002	1.05017	2.14	0.162524	0	0.756797	0.306006	0.64101	1.29968		0	0.000961356	0.00111418	0.00234594	0.000656269	0.00126326	0.000255838	0	0.000867528	0.000495948	0.000577633	0.00135377
																		0	0	0	0	0	0	0	0	0	0	0
																		0	0	0	0	0	0	0	0	0	0	0
###	PhosphatidylinositolOx6																	0	0	0	0	0	0	0	0	0	0	0
981.52	H82 C47 O19 P1	0.66ppm	PIOx6 38:4	0	0	45511.2	41143.3	90756.6	72614.5	112437	21923.2	7057.2	24189.3	17011	29877	51217.3	PIOx6 38:4	0.818604	1.02534	3.14531	1.60008	2.55575	0.390544	0.105959	0.535303	0.316577	0.607221	1.00638		0	0.000604004	0.000686006	0.00127218	0.000999916	0.00150868	0.000614775	0.00020241	0.000613626	0.00051308	0.000547185	0.00104827
979.505	H80 C47 O19 P1	1.86ppm	PIOx6 38:5	0	0	0	21221.8	61861.1	0	0	11925.2	0	11068.9	7394.3	0	15705.9	PIOx6 38:5	0	0.528872	2.14389	0	0	0.212438	0	0.244952	0.137609	0	0.30861		0	0	0.000353843	0.000867141	0	0	0.000334409	0	0.000280792	0.000223024	0	0.000321454
[truncated: 37 more columns]
