# Supplementary material for: Activation of lysosomal iron triggers ferroptosis in cancer
Source: Research Square preprint supplement (doi:10.21203/rs.3.rs-4165774/v1), 2024-04-08
Supplement: Supplementary file 6 [file b68d3c2e547259f797b1277e.xlsx]

## Sheet: Title
	Supplementary Table 1
	Quantitative mass spectrometry-based lipidomics of oxidised phospholipids in
	HT1080 cells treated with ferroptosis inducers

## Sheet: PC and PCOx
	precursorexpmz$A	sumcomposition	precursorppmdev$A	name	intensity:Exp6_Sebastian_10_00.mzML	intensity:Exp6_Sebastian_10_01.mzML	intensity:Exp6_Sebastian_10_02.mzML	intensity:Exp6_Sebastian_10_03.mzML	intensity:Exp6_Sebastian_10_04.mzML	intensity:Exp6_Sebastian_10_05.mzML	intensity:Exp6_Sebastian_10_06.mzML	intensity:Exp6_Sebastian_10_07.mzML	intensity:Exp6_Sebastian_10_08.mzML	intensity:Exp6_Sebastian_10_09.mzML	intensity:Exp6_Sebastian_10_10.mzML	intensity:Exp6_Sebastian_10_11.mzML	intensity:Exp6_Sebastian_10_12.mzML	intensity:Exp6_Sebastian_10_13.mzML	intensity:Exp6_Sebastian_10_14.mzML	intensity:Exp6_Sebastian_10_15.mzML	intensity:Exp6_Sebastian_10_16.mzML	intensity:Exp6_Sebastian_10_17.mzML	intensity:Exp6_Sebastian_10_18.mzML	intensity:Exp6_Sebastian_10_19.mzML	intensity:Exp6_Sebastian_10_20.mzML	intensity:Exp6_Sebastian_10_21.mzML	intensity:Exp6_Sebastian_10_22.mzML	intensity:Exp6_Sebastian_10_23.mzML	intensity:Exp6_Sebastian_10_24.mzML	intensity:Exp6_Sebastian_10_25.mzML	intensity:Exp6_Sebastian_10_26.mzML	intensity:Exp6_Sebastian_10_27.mzML	intensity:Exp6_Sebastian_10_28.mzML	intensity:Exp6_Sebastian_10_29.mzML	intensity:Exp6_Sebastian_10_30.mzML	name	intensity:Exp6_Sebastian_10_01.mzML	intensity:Exp6_Sebastian_10_02.mzML	intensity:Exp6_Sebastian_10_03.mzML	intensity:Exp6_Sebastian_10_04.mzML	intensity:Exp6_Sebastian_10_05.mzML	intensity:Exp6_Sebastian_10_06.mzML	intensity:Exp6_Sebastian_10_07.mzML	intensity:Exp6_Sebastian_10_08.mzML	intensity:Exp6_Sebastian_10_09.mzML	intensity:Exp6_Sebastian_10_10.mzML	intensity:Exp6_Sebastian_10_11.mzML	intensity:Exp6_Sebastian_10_12.mzML	intensity:Exp6_Sebastian_10_13.mzML
						Ctrl.	Fento 1 µM	Fento 2 µM	Erastin 10 µM	RSL3 100 nM	iFSP1 10 µM	Ctrl.	Fento 1 µM	Fento 2 µM	Erastin 10 µM	RSL3 100 nM	iFSP1 10 µM	Ctrl.	Fento 1 µM	Fento 2 µM	Erastin 10 µM	RSL3 100 nM	iFSP1 10 µM	Ctrl.	Fento 1 µM	Fento 2 µM	Erastin 10 µM	RSL3 100 nM	iFSP1 10 µM	Ctrl.	Fento 1 µM	Fento 2 µM	Erastin 10 µM	RSL3 100 nM	iFSP1 10 µM		Normalization
	###	Phosphatidylcholine			0	1	2	3	4	5	6	7	8	9	10	11	12	13	14	15	16	17	18	19	20	21	22	23	24	25	26	27	28	29	30
	762.6	H85 C42 N1 O8 P1	-1.03ppm	PC 34:0	1.85882e+08	1.08418e+08	1.34378e+08	1.13945e+08	1.18187e+08	1.28087e+08	1.3004e+08	1.22313e+08	1.12976e+08	1.36859e+08	1.17949e+08	1.19185e+08	1.46218e+08	1.52615e+08	1.18777e+08	1.35057e+08	1.38811e+08	1.27328e+08	1.29582e+08	1.51475e+08	126364887	1.26206e+08	1.34296e+08	1.42671e+08	9.01162e+07	1.47045e+08	1.26771e+08	1.13804e+08	1.38089e+08	1.44608e+08	1.37701e+08		1	2	3	4	5	6	7	8	9	10	11	12	13
	678.507	H73 C36 N1 O8 P1	0.07ppm	PC 28:0	0	2.04902e+06	2.22296e+06	2.6328e+06	2.67907e+06	3.43234e+06	2.68534e+06	2858498	3.05007e+06	2.86891e+06	2.767e+06	2.91394e+06	3378002	1.64688e+06	2.50642e+06	1.42461e+06	2.54241e+06	2.75299e+06	2.71775e+06	2.53841e+06	2.63702e+06	2.74447e+06	2.83716e+06	2.85095e+06	1.78443e+06	2.01384e+06	2.7078e+06	3.55946e+06	2.60167e+06	3.1112e+06	2.86505e+06	PC 28:0	5.66977	4.96276	6.93175	6.80042	8.0391	6.19501	7.0111	8.09926	6.28875	7.03777	7.33469	6.93073	3.23732
	706.538	H77 C38 N1 O8 P1	-0.23ppm	PC 30:0	0	3.19874e+07	3.08944e+07	3.86896e+07	3.63389e+07	4.69435e+07	3.98664e+07	4.24026e+07	4.3182e+07	4.30807e+07	3.85005e+07	3.98087e+07	5.3073e+07	2.87232e+07	3.58165e+07	2.1729e+07	4.1356e+07	4.37429e+07	4.17159e+07	4.05493e+07	3.89028e+07	4.18881e+07	4.55135e+07	4.51644e+07	2.80332e+07	3.36945e+07	3.97104e+07	4.79782e+07	4.39123e+07	4.94252e+07	4.41307e+07	PC 30:0	88.5111	68.9719	101.863	92.2406	109.949	91.971	104.002	114.667	94.4341	97.9249	100.203	108.891	56.462
	734.569	H81 C40 N1 O8 P1	-0.44ppm	PC 32:0	0	5.63764e+07	4.85231e+07	6.11066e+07	57684321	7.82883e+07	7.22694e+07	7.10619e+07	6.65946e+07	6.84644e+07	6.12726e+07	6.58975e+07	9.45106e+07	5.43581e+07	5.94675e+07	3.70527e+07	7.57952e+07	7.78426e+07	7.2727e+07	73676673	6.39664e+07	7.07045e+07	8.05589e+07	8.13669e+07	4.98885e+07	6.23837e+07	6.48285e+07	7.6401e+07	7.87459e+07	9.08289e+07	7.75215e+07	PC 32:0	155.997	108.328	160.884	146.423	183.364	166.724	174.295	176.838	150.076	155.845	165.871	193.91	106.853
	702.507	H73 C38 N1 O8 P1	0.40ppm	PC 30:2	0	178663	250273	226852	238556	321802	215872	262160	373349	254920	259815	248303	353298	169529	267560	134628	273936	279224	276839	262617	266932	349489	304211	294826	169485	196331	274695	375040	298169	283867	281790	PC 30:2	0.49437	0.558736	0.597265	0.605538	0.753712	0.498012	0.643005	0.991404	0.558793	0.660832	0.625004	0.724871	0.333248
	730.538	H77 C40 N1 O8 P1	0.10ppm	PC 32:2	0	7.954e+06	7.62845e+06	9.60507e+06	9.69087e+06	1.28525e+07	1.01449e+07	1.16242e+07	1.10671e+07	10876875	1.06347e+07	1.11444e+07	1.24896e+07	6.95405e+06	9.47479e+06	5.18308e+06	10625008	1.03759e+07	1.09504e+07	1.01028e+07	1.01073e+07	1.03482e+07	1.17095e+07	1.05134e+07	6.61647e+06	8.35559e+06	1.01194e+07	1.22588e+07	1.06926e+07	1.10505e+07	1.0821e+07	PC 32:2	22.0092	17.0306	25.2886	24.5988	30.1028	23.404	28.5108	29.388	23.8424	27.0489	28.0516	25.6253	13.6698
	758.57	H81 C42 N1 O8 P1	0.16ppm	PC 34:2	0	6.02036e+07	5.36206e+07	7.14509e+07	69630323	9.27074e+07	7.60857e+07	8.28482e+07	7.68814e+07	7.97925e+07	7.46123e+07	7.8895e+07	9.23556e+07	5.08645e+07	65587368	3.78693e+07	7.70546e+07	7.57287e+07	7.99612e+07	7.56704e+07	7.25994e+07	7.45685e+07	8.43906e+07	7.95469e+07	5.03959e+07	6.17157e+07	7.09634e+07	8.42316e+07	7.91561e+07	83651785	7.98324e+07	PC 34:2	166.587	119.708	188.119	176.746	217.136	175.528	203.204	204.154	174.907	189.774	198.587	189.488	99.9858
	786.6	H85 C44 N1 O8 P1	-0.64ppm	PC 36:2	0	98657841	9.40677e+07	1.2202e+08	1.09756e+08	1.5328e+08	1.26599e+08	1.36643e+08	1.3406e+08	1.36103e+08	1.1929e+08	1.26865e+08	1.62888e+08	9.71989e+07	1.17838e+08	6.47794e+07	1.40837e+08	1.37783e+08	1.44933e+08	1.38259e+08	1.28588e+08	1.24265e+08	1.54527e+08	1.44719e+08	9.22416e+07	1.13768e+08	1.28441e+08	1.47332e+08	1.45177e+08	1.5301e+08	1.47103e+08	PC 36:2	272.992	210.007	321.26	278.599	359.008	292.06	335.146	355.989	298.342	303.41	319.332	334.201	191.067
	814.631	H89 C46 N1 O8 P1	-0.80ppm	PC 38:2	0	5.3945e+06	5.65535e+06	6.6963e+06	5.85123e+06	8.73934e+06	7.00296e+06	7.70146e+06	7.84289e+06	7.59106e+06	6.36204e+06	6.78496e+06	8.65383e+06	5.3972e+06	6.82527e+06	3417939	8221195	8.29664e+06	8.3435e+06	7.95828e+06	7.46166e+06	6.77569e+06	8939173	8.32262e+06	5.28154e+06	6.52649e+06	7.25369e+06	8394344	8.15562e+06	9057165	8.73857e+06	PC 38:2	14.9269	12.6256	17.6303	14.8524	20.469	16.1557	18.8895	20.8263	16.6398	16.1816	17.0784	17.7553	10.6094
	842.663	H93 C48 N1 O8 P1	-0.75ppm	PC 40:2	0	760339	714686	925103	870025	1.14792e+06	1.00705e+06	1.10197e+06	1.02136e+06	1.16407e+06	890192	944784	1.16179e+06	742194	971370	392773	1024531	982923	1.11795e+06	1.05036e+06	994134	944848	1.29067e+06	1.02479e+06	739897	870750	1.04585e+06	1.21973e+06	1147506	1.14043e+06	1.15124e+06	PC 40:2	2.10391	1.59554	2.43565	2.20842	2.68862	2.32323	2.70282	2.71217	2.55167	2.26417	2.37812	2.38368	1.45895
	870.694	H97 C50 N1 O8 P1	-0.76ppm	PC 42:2	0	633430	802007	861197	763469	1.14668e+06	874325	954851	934927	889011	780890	917551	1.09835e+06	674976	889461	401856	957010	896401	1.20411e+06	968120	950962	740421	1.1922e+06	932838	701343	801593	922550	1.11606e+06	1.05328e+06	879710	1.16252e+06	PC 42:2	1.75274	1.79049	2.26739	1.93795	2.68571	2.01705	2.34198	2.48264	1.94874	1.98617	2.30957	2.25352	1.32682
	756.554	H79 C42 N1 O8 P1	0.26ppm	PC 34:3	0	5.67117e+06	4.93031e+06	6.68878e+06	6.31484e+06	8.33246e+06	7.18038e+06	7.94651e+06	7.07291e+06	6.96146e+06	6.91497e+06	7.62609e+06	8.94375e+06	5.31353e+06	6.34415e+06	4.00525e+06	7.66443e+06	7.91713e+06	8.2955e+06	8.00457e+06	6.64203e+06	7.23097e+06	8.56254e+06	8416495	7.09077e+06	6.29151e+06	6.3436e+06	7025502	7834579	8.8664e+06	7.85123e+06	PC 34:3	15.6925	11.007	17.6105	16.0293	19.516	16.565	19.4906	18.7817	15.2597	17.588	19.1957	18.3501	10.445
	784.585	H83 C44 N1 O8 P1	-0.73ppm	PC 36:3	1.22664e+06	27205449	2.31984e+07	3.18383e+07	3.02809e+07	4.07955e+07	3.39502e+07	3.78382e+07	3.08757e+07	34176985	3.29759e+07	3.57169e+07	4.37741e+07	2.49974e+07	2.8952e+07	2.00449e+07	37537705	3.95214e+07	37808307	3.59029e+07	3.19681e+07	3.722e+07	39814895	4.1432e+07	2.88749e+07	2.95991e+07	2.98788e+07	3.24667e+07	36568631	43513076	3.76202e+07	PC 36:3	75.2792	51.7905	83.825	76.8635	95.5498	78.3222	92.8065	81.9884	74.917	83.8732	89.903	89.8125	49.1382
	782.569	H81 C44 N1 O8 P1	-0.54ppm	PC 36:4	0	2.83605e+07	1.55697e+07	3.73256e+07	2.7515e+07	3.86898e+07	3.63675e+07	3.81069e+07	2.0408e+07	3.90308e+07	3.0314e+07	3.32011e+07	4.71915e+07	2.27546e+07	1.99122e+07	1.8673e+07	3.44085e+07	3.12709e+07	3.20699e+07	3.2788e+07	2.28766e+07	3.5217e+07	3.63739e+07	3.47181e+07	3.49558e+07	2.72169e+07	2.12777e+07	2.05622e+07	3.35546e+07	3.56889e+07	3.21678e+07	PC 36:4	78.4751	34.7594	98.2723	69.8425	90.6179	83.899	93.4656	54.1922	85.5567	77.1027	83.5706	96.824	44.7294
	780.553	H79 C44 N1 O8 P1	-0.45ppm	PC 36:5	0	4.24525e+06	2564842	5.42259e+06	4.14994e+06	6.15346e+06	5.58622e+06	6.04584e+06	3233736	5.95329e+06	4.70209e+06	5.1705e+06	6.96275e+06	4.14371e+06	3.35398e+06	2.88018e+06	6.46969e+06	6.14565e+06	5.92706e+06	6.24662e+06	3.93544e+06	5.35737e+06	7.01475e+06	6.3249e+06	5.99861e+06	4.92692e+06	3398596	3.16499e+06	6.5177e+06	6.81091e+06	5931978	PC 36:5	11.7469	5.72602	14.2768	10.534	14.4124	12.8873	14.8288	8.58698	13.0498	11.9596	13.0147	14.2856	8.14541
	778.538	H77 C44 N1 O8 P1	-0.47ppm	PC 36:6	0	703419	377918	779889	677488	1.06865e+06	970903	948752	510429	966626	785494	871012	1.1623e+06	724312	652204	540424	1.18413e+06	1.18435e+06	1.0607e+06	1048168	663911	982012	1.19959e+06	1.14703e+06	860869	834314	583690	528075	1.17175e+06	1.27952e+06	1131103	PC 36:6	1.9464	0.843703	2.05332	1.7197	2.50295	2.23985	2.32703	1.35541	2.11887	1.99788	2.19243	2.38472	1.4238
	754.538	H77 C42 N1 O8 P1	0.00ppm	PC 34:4	0	1.83491e+06	1.46989e+06	2468250	1.99481e+06	2481569	2.13919e+06	2367645	1.52807e+06	2.06664e+06	2.1353e+06	2.35932e+06	2904648	1.367e+06	1.41582e+06	1.3022e+06	2039464	2.13715e+06	2.45988e+06	2.04634e+06	1.51334e+06	2.14325e+06	2.25494e+06	2.02222e+06	4.83175e+06	1.6923e+06	1.57518e+06	1.44664e+06	2.19034e+06	2.15321e+06	2.03008e+06	PC 34:4	5.07732	3.28153	6.4985	5.06351	5.81224	4.93507	5.80718	4.0577	4.53014	5.43106	5.93866	5.95954	2.68715
	812.616	H87 C46 N1 O8 P1	-0.77ppm	PC 38:3	0	9.05925e+06	7.58684e+06	1.123e+07	9.50457e+06	1.37508e+07	1.19224e+07	1.24964e+07	1.03751e+07	1.255e+07	1.05811e+07	1.12774e+07	1.48005e+07	8.65837e+06	9.7641e+06	6.62097e+06	1.3237e+07	1.37993e+07	1.28053e+07	1.29817e+07	1.07326e+07	1.28149e+07	1.45282e+07	1.44143e+07	8.18377e+06	1.04413e+07	1.027e+07	1.07974e+07	13359954	1.58522e+07	1.31985e+07	PC 38:3	25.0675	16.9377	29.5667	24.1259	32.2065	27.5047	30.6502	27.5505	27.5099	26.9126	28.3865	30.3667	17.02
	810.6	H85 C46 N1 O8 P1	-0.66ppm	PC 38:4	115088	3.70102e+07	2.03903e+07	4.59823e+07	3.42203e+07	5.10105e+07	4.95228e+07	5.00135e+07	2.73484e+07	5.1206e+07	3.8344e+07	4.2139e+07	6.27904e+07	3.3862e+07	2.90009e+07	2.54906e+07	5.09262e+07	4.84416e+07	4.53954e+07	49409906	3.2608e+07	4.9876e+07	5.34329e+07	5.29565e+07	3.19695e+07	39460135	2.99893e+07	2.85557e+07	5.00574e+07	5.56989e+07	4.82905e+07	PC 38:4	102.409	45.5215	121.064	86.8631	119.475	114.248	122.669	72.6221	112.245	97.5267	106.068	128.829	66.5636
	808.584	H83 C46 N1 O8 P1	-0.79ppm	PC 38:5	0	3.35683e+07	1.64454e+07	4.19066e+07	2.8366e+07	4.54387e+07	4.30139e+07	44575933	2.08146e+07	4.57841e+07	3.39442e+07	3.76594e+07	5.49997e+07	3.04166e+07	2.38118e+07	2.08846e+07	4.70882e+07	4.28397e+07	4.13396e+07	4.44974e+07	2.75644e+07	42341152	4.95339e+07	4.66847e+07	3.30573e+07	3.57102e+07	2.42446e+07	2.10178e+07	4.50764e+07	4.76874e+07	4.44857e+07	PC 38:5	92.8855	36.7145	110.333	72.0027	106.425	99.2321	109.332	55.272	100.36	86.336	94.7927	112.844	59.7907
	806.569	H81 C46 N1 O8 P1	-0.33ppm	PC 38:6	0	1.19531e+07	6.75073e+06	1.47346e+07	1.04886e+07	1.68433e+07	1.56934e+07	1.62285e+07	8587545	1.60863e+07	1.22149e+07	1.42552e+07	2.0499e+07	1.19448e+07	9791145	8180103	19095502	1.88496e+07	1.68633e+07	1.74363e+07	1.11845e+07	1.71657e+07	2.05977e+07	1.98399e+07	1.25411e+07	1.39819e+07	9.76788e+06	8.38407e+06	18774286	2.04953e+07	1.82157e+07	PC 38:6	33.075	15.071	38.7939	26.6237	39.4499	36.2042	39.804	22.8037	35.2615	31.0683	35.8819	42.0583	23.4803
	752.523	H75 C42 N1 O8 P1	0.79ppm	PC 34:5	0	46419.7	0	53188.7	0	87225.5	104599	144988	26392.5	47637.8	112124	81298.7	85919.2	70767.5	135197	43521.3	111049	139696	19982.6	112155	96204	83167.2	211182	195171	262911	114517	72864.1	55895.2	154083	128490	148671	PC 34:5	0.128446	0	0.140037	0	0.204296	0.241308	0.355614	0.0700836	0.104423	0.285183	0.204637	0.176283	0.13911
	840.647	H91 C48 N1 O8 P1	-0.65ppm	PC 40:3	0	1.26859e+06	1.04598e+06	1.59012e+06	1.26329e+06	1.98766e+06	1.72578e+06	1.73755e+06	1.37857e+06	1.79569e+06	1.38828e+06	1.56786e+06	2.00319e+06	1.19012e+06	1.46386e+06	757871	1.97183e+06	1.79809e+06	1.79781e+06	1.91509e+06	1.5633e+06	1.6221e+06	2.16683e+06	1.90798e+06	1.15731e+06	1.4701e+06	1.44388e+06	1.52717e+06	1.89874e+06	2.15747e+06	2.02394e+06	PC 40:3	3.51028	2.33515	4.18652	3.20667	4.65544	3.98133	4.26174	3.66072	3.93621	3.53104	3.94648	4.11001	2.33946
	838.631	H89 C48 N1 O8 P1	-0.68ppm	PC 40:4	0	5.98951e+06	3.52815e+06	7.41553e+06	5.63766e+06	8.68202e+06	8.01115e+06	8.23418e+06	4.8933e+06	8307964	6325627	7.02282e+06	1.0284e+07	5.45643e+06	5.26754e+06	3.84338e+06	9024270	8.13775e+06	7.94206e+06	8.13082e+06	5.84529e+06	8.13983e+06	8.94896e+06	9.09309e+06	5249925	6.62914e+06	5.52917e+06	5.02562e+06	8.61345e+06	9.57379e+06	8.49547e+06	PC 40:4	16.5733	7.87662	19.5239	14.3103	20.3347	18.4815	20.1962	12.9938	18.2113	16.089	17.6772	21.0999	10.7259
	836.616	H87 C48 N1 O8 P1	-0.72ppm	PC 40:5	0	1.37582e+07	6.79584e+06	1.72536e+07	1.2036e+07	1.90927e+07	18393331	1.915e+07	9.01715e+06	1.94768e+07	1.42579e+07	1.58045e+07	2.3754e+07	1.35814e+07	1.03292e+07	8.92687e+06	2.04501e+07	1.93168e+07	1.80774e+07	1.99642e+07	1.20772e+07	18405673	2.22231e+07	2.09505e+07	1.22315e+07	1.63818e+07	1.06291e+07	9306391	2.03759e+07	2.20946e+07	2.04615e+07	PC 40:5	38.0697	15.1718	45.426	30.5516	44.7183	42.433	46.9696	23.9445	42.6937	36.2646	39.7815	48.7368	26.6973
	834.6	H85 C48 N1 O8 P1	-0.77ppm	PC 40:6	24780.3	1.35591e+07	6.76715e+06	1.73138e+07	1.07944e+07	1.8287e+07	1.83101e+07	1.86703e+07	8.40946e+06	1.88492e+07	13475010	1.43989e+07	2.33517e+07	1.43457e+07	1.07803e+07	8.99416e+06	2.23248e+07	21114838	19244136	2.20623e+07	1.22021e+07	1.9079e+07	2.49679e+07	2.34599e+07	1.37821e+07	1.78439e+07	1.05377e+07	8.69156e+06	2.27738e+07	2.53254e+07	22639348	PC 40:6	37.519	15.1077	45.5845	27.4	42.8311	42.2411	45.7932	22.3308	41.318	34.2733	36.2436	47.9113	28.1998
	832.585	H83 C48 N1 O8 P1	-0.74ppm	PC 40:7	0	7.02941e+06	2.56833e+06	8.95519e+06	4.91771e+06	8.66272e+06	9.03373e+06	9.29872e+06	3.17795e+06	9.72892e+06	6.13676e+06	6.88627e+06	1.17364e+07	7062585	4.26747e+06	4.70759e+06	1.09565e+07	1.07444e+07	9.38027e+06	1.07767e+07	5.29681e+06	9.65091e+06	1.22699e+07	1.17743e+07	7.5975e+06	8.50197e+06	4.18442e+06	2974825	1.07696e+07	1.20192e+07	1.1104e+07	PC 40:7	19.4508	5.73382	23.5776	12.4828	20.2895	20.8406	22.8072	8.43884	21.3261	15.6087	17.3335	24.0798	13.8831
	830.568	H81 C48 N1 O8 P1	-1.66ppm	PC 40:8	242142	1.00115e+06	488977	1.15806e+06	609248	998704	1.13148e+06	1.0506e+06	410951	1.12992e+06	832135	1.11226e+06	1.14023e+06	910806	561039	667112	1.13663e+06	1324511	1.11085e+06	1.18148e+06	630088	1.14838e+06	1.38934e+06	1.26004e+06	2.10769e+06	990257	552959	414691	1.30732e+06	1.23791e+06	1.16412e+06	PC 40:8	2.77023	1.09164	3.04899	1.54648	2.33913	2.61029	2.57683	1.09125	2.47682	2.11651	2.79968	2.33945	1.7904
	868.678	H95 C50 N1 O8 P1	-0.58ppm	PC 42:3	0	473732	434378	600731	465496	726323	628686	653958	641038	652367	548153	583370	735036	555894	562922	273129	768782	713712	683608	823533	701042	476754	914431	727564	471924	647710	690007	705345	832126	831308	761974	PC 42:3	1.31085	0.969752	1.58163	1.18159	1.70117	1.45036	1.60398	1.70224	1.43001	1.39421	1.4684	1.50809	1.09274
	866.663	H93 C50 N1 O8 P1	-0.57ppm	PC 42:4	0	1.05635e+06	738298	1342424	1.11367e+06	1523948	1.55348e+06	1.48774e+06	1.07154e+06	1.38287e+06	1.23512e+06	1.24319e+06	1.77704e+06	1.01999e+06	1.14206e+06	589670	1.77288e+06	1.56373e+06	1.56437e+06	1.82622e+06	1.23306e+06	1.27854e+06	1.85889e+06	1.6462e+06	1033928	1.32097e+06	1.00779e+06	941544	1.7483e+06	1.70827e+06	1.7889e+06	PC 42:4	2.92299	1.64825	3.53439	2.82689	3.56934	3.58383	3.649	2.84541	3.03128	3.1415	3.12923	3.64601	2.00501
	864.647	H91 C50 N1 O8 P1	-1.04ppm	PC 42:5	0	1.77174e+06	813930	2.34799e+06	1.6319e+06	2827450	2.54876e+06	2.48459e+06	1.15703e+06	2.4668e+06	2.05313e+06	2.23343e+06	3.45313e+06	1.59878e+06	1.47704e+06	915298	2.89382e+06	2.56784e+06	2.4742e+06	2.8392e+06	1.68921e+06	2.51943e+06	3.13858e+06	2.79293e+06	1.73301e+06	2.29301e+06	1.49577e+06	1.12314e+06	3.1124e+06	3.03916e+06	2.82848e+06	PC 42:5	4.9025	1.8171	6.18187	4.14232	6.62235	5.87994	6.09402	3.07241	5.40729	5.22207	5.62178	7.08487	3.14277
	862.632	H89 C50 N1 O8 P1	0.05ppm	PC 42:6	0	1.27186e+06	493395	1.70469e+06	1.02436e+06	2.00721e+06	1.84965e+06	1.84951e+06	705423	1.87487e+06	1.44923e+06	1.57118e+06	2.38284e+06	1.40185e+06	1.07369e+06	723505	2.28751e+06	2.26043e+06	1.85016e+06	2.24227e+06	1.15315e+06	1.74786e+06	2.47645e+06	2.23839e+06	1.33392e+06	1.72283e+06	979725	646525	2.25186e+06	2.27285e+06	2.27636e+06	PC 42:6	3.51933	1.10151	4.48817	2.60017	4.70122	4.2671	4.53633	1.87321	4.10977	3.68606	3.95482	4.88894	2.75566
	860.616	H87 C50 N1 O8 P1	-0.64ppm	PC 42:7	0	1.15048e+06	397795	1.54931e+06	873696	1.47759e+06	1.534e+06	1.57375e+06	462138	1.68944e+06	1.10052e+06	1.15357e+06	1.9423e+06	1.18349e+06	733251	736503	1757997	1511501	1.44994e+06	1832352	880304	1560867	2.08296e+06	1.81974e+06	1.19876e+06	1445118	689346	440041	1.81065e+06	1.96533e+06	1.81294e+06	PC 42:7	3.18344	0.888079	4.07908	2.21774	3.46077	3.53891	3.85998	1.22718	3.70329	2.79914	2.90366	3.98506	2.32642
	858.6	H85 C50 N1 O8 P1	-0.90ppm	PC 42:8	89507.7	1044894	336734	1.31726e+06	678715	1.30392e+06	1.2661e+06	1.35349e+06	374334	1.49406e+06	955596	976621	1.64989e+06	813843	480126	717389	1.32738e+06	1.26035e+06	1.14639e+06	1360094	609760	1.35204e+06	1.35676e+06	1325731	1.22504e+06	1.08401e+06	481598	389242	1.20749e+06	1.31374e+06	1.23127e+06	PC 42:8	2.89129	0.75176	3.46812	1.72281	3.05399	2.92086	3.31973	0.99402	3.27502	2.43053	2.45826	3.38512	1.5998
	856.585	H83 C50 N1 O8 P1	-0.73ppm	PC 42:9	0	756904	194000	831295	408564	794457	940574	809409	185424	909203	522313	556208	1.0866e+06	593552	314630	482372	993458	1.11964e+06	735536	896448	372231	973060	1007848	1.13419e+06	1.04566e+06	791891	262074	242604	879463	1.03525e+06	901701	PC 42:9	2.0944	0.433105	2.18867	1.03708	1.86075	2.16988	1.98526	0.492383	1.993	1.32849	1.40003	2.2294	1.16676
	854.569	H81 C50 N1 O8 P1	0.12ppm	PC 42:10	0	310372	64236.6	352444	149248	326022	420205	463700	75170.5	337080	246111	263465	434081	283603	154698	239552	502862	463812	373067	447403	132328	451264	527508	472210	593357	366266	153722	112929	506354	453069	480414	PC 42:10	0.85882	0.143409	0.927929	0.378843	0.763598	0.969402	1.13733	0.199611	0.738889	0.625975	0.663169	0.890615	0.557486
	728.523	H75 C40 N1 O8 P1	0.14ppm	PC 32:3	0	793010	864917	953822	872470	1.08035e+06	978548	1065313	1.07393e+06	941757	931982	1.00654e+06	1.22659e+06	822334	890671	621808	1.24364e+06	1.29061e+06	1.28587e+06	1.13893e+06	1.04652e+06	1.00694e+06	1.32932e+06	1.34489e+06	2.20459e+06	897105	911404	1.05133e+06	1.27711e+06	1.41561e+06	1.25851e+06	PC 32:3	2.19431	1.93093	2.51126	2.21463	2.53036	2.25749	2.61292	2.85175	2.06436	2.37047	2.53358	2.51663	1.61649
	760.585	H83 C42 N1 O8 P1	-0.33ppm	PC 34:1	0	2.47086e+08	232704871	3.06427e+08	2.77263e+08	3.71919e+08	3.18022e+08	3.36715e+08	3.3024e+08	3.41009e+08	2.97679e+08	3.14751e+08	3.82572e+08	2.30157e+08	2.80558e+08	1.60088e+08	3.38637e+08	3.30785e+08	3.43025e+08	3.30498e+08	307184563	3.07955e+08	3.71444e+08	352472030	2.24469e+08	2.74871e+08	3.11658e+08	3.71704e+08	3.53223e+08	3.8259e+08	3.59252e+08	PC 34:1	683.703	519.515	806.773	703.789	871.096	733.67	825.868	876.932	747.502	757.136	792.261	784.933	452.426
	872.71	H99 C50 N1 O8 P1	-0.63ppm	PC 42:1	0	633784	679730	903188	813678	1.02554e+06	805660	1.00903e+06	1.0624e+06	806833	853852	931147	1.08594e+06	691991	960128	417383	980081	961991	1.11978e+06	1034366	1.07219e+06	850132	1.15123e+06	972414	670874	886317	1.04913e+06	1.12042e+06	994714	1.10839e+06	1.15736e+06	PC 42:1	1.75372	1.5175	2.37795	2.0654	2.40198	1.85864	2.47488	2.82113	1.7686	2.17174	2.34379	2.22805	1.36027
	844.678	H95 C48 N1 O8 P1	-0.79ppm	PC 40:1	0	615240	644302	696414	635981	989315	753308	845111	863487	746292	725280	862646	958169	589926	851022	343318	931420	863742	949238	913268	857736	717457	1.0202e+06	935162	656288	676676	837454	1.03729e+06	905272	906408	982062	PC 40:1	1.70241	1.43841	1.83355	1.61434	2.31714	1.73786	2.07282	2.29294	1.63589	1.84473	2.17137	1.9659	1.15963
	816.647	H91 C46 N1 O8 P1	-0.56ppm	PC 38:1	0	1.18856e+06	1.28098e+06	1.77771e+06	1.25654e+06	1.72166e+06	1.56394e+06	1.87184e+06	1.95055e+06	1.76806e+06	1.42134e+06	1.54273e+06	2.00461e+06	1427519	1.68121e+06	797948	2.07003e+06	2.06873e+06	2.00951e+06	2.1787e+06	1.79155e+06	1.78298e+06	2.17564e+06	2.16667e+06	1.35002e+06	1.5541e+06	1.89093e+06	2.07843e+06	2.26625e+06	2.63173e+06	2.17772e+06	PC 38:1	3.28882	2.8598	4.68044	3.18953	4.03242	3.60797	4.59109	5.17957	3.87565	3.61514	3.8832	4.11291	2.80612
	788.616	H87 C44 N1 O8 P1	-1.04ppm	PC 36:1	0	3.79212e+07	3.98364e+07	4.85119e+07	4.05647e+07	5.52278e+07	4.94896e+07	5.04487e+07	5.53587e+07	5.46894e+07	4.31396e+07	4.58247e+07	6.35215e+07	4.22159e+07	4.69525e+07	2.7394e+07	6.23485e+07	6.26724e+07	5.8858e+07	5.79558e+07	5.1581e+07	5.26937e+07	6.63155e+07	6.55829e+07	3.8504e+07	4.94838e+07	5.24926e+07	6.15094e+07	6.2801e+07	7.32605e+07	6.32441e+07	PC 36:1	104.93	88.9349	127.724	102.967	129.353	114.171	123.737	147.001	119.881	109.724	115.346	130.329	82.985
	732.554	H79 C40 N1 O8 P1	-0.02ppm	PC 32:1	0	8.06767e+07	72239987	9.86801e+07	92646461	1.2243e+08	1.02362e+08	1.11189e+08	103233847	1.09978e+08	9.89263e+07	1.0404e+08	133196415	6.8061e+07	8.65886e+07	52791183	9.96842e+07	9.76882e+07	1.02758e+08	9.74989e+07	9.48041e+07	1.00052e+08	1.10051e+08	103258663	6.66739e+07	8.09581e+07	94581563	1.149e+08	1.03491e+08	1.1101e+08	1.05167e+08	PC 32:1	223.237	161.276	259.809	235.169	286.752	236.146	272.715	274.131	241.074	251.616	261.878	273.282	133.789
	704.522	H75 C38 N1 O8 P1	-0.08ppm	PC 30:1	0	5.85756e+06	5.70257e+06	7.48438e+06	7.56986e+06	9.91073e+06	7.40325e+06	8.7665e+06	8.28794e+06	8.08269e+06	8.26986e+06	8314561	9877796	4.88097e+06	6.65133e+06	3.91469e+06	6.82647e+06	6.82408e+06	7.61129e+06	6.9251e+06	7.16204e+06	7.69861e+06	7.83534e+06	7.29521e+06	4.74566e+06	5.53976e+06	7.22772e+06	9.21049e+06	7.3118e+06	7.75716e+06	7.27145e+06	PC 30:1	16.2082	12.731	19.7052	19.2149	23.2126	17.0791	21.5018	22.0081	17.7175	21.0341	20.9286	20.2665	9.59467
	676.491	H71 C36 N1 O8 P1	0.19ppm	PC 28:1	0	17930	0	0	0	22808.4	0	0	57530.6	43097.3	57081.8	0	0	0	38220.8	13890.6	20163.2	0	31926.5	0	36554.9	31933.6	22730.3	30231	0	0	26379.8	54377.4	0	0	36980.4	PC 28:1	0.0496134	0	0	0	0.053421	0	0	0.152769	0.0944706	0.145186	0	0	0
	###	PhosphatidylcholineOx																																			0	0	0	0	0	0	0	0	0	0	0	0	0
0	690.471	H69 C36 N1 O9 P1	0.26ppm	PCOx 28:2	0	0	13212.2	0	19110.5	0	0	0	34761.2	0	0	0	0	0	42426.4	0	0	0	27426.7	0	43141.7	0	0	16557.1	0	0	25233.7	107893	0	0	0	PCOx 28:2	0	0.0294963	0	0.0485091	0	0	0	0.0923062	0	0	0	0	0
0	774.564	H81 C42 N1 O9 P1	-0.37ppm	PCOx 34:2	0	324395	1.88947e+06	318991	1242598	1.11178e+06	260387	611941	2.62147e+06	277232	1.02776e+06	1.06879e+06	190015	181338	1.50721e+06	173440	174062	368907	824768	187351	1.56307e+06	254760	1.217e+06	369550	175554	72908.8	1652056	3.03092e+06	181531	93608.2	413927	PCOx 34:2	0.897622	4.21824	0.839852	3.15414	2.60398	0.600706	1.50092	6.96116	0.607701	2.61408	2.69024	0.389859	0.35646
0	746.534	H77 C40 N1 O9 P1	0.81ppm	PCOx 32:2	0	69194.5	423642	36835.4	454280	200795	53991.1	199118	667811	57052	366443	287400	0	0	368293	0	0	0	266649	0	411764	0	0	0	0	0	454246	823505	0	0	0	PCOx 32:2	0.191465	0.945784	0.0969817	1.15312	0.470295	0.124556	0.48838	1.77333	0.12506	0.932036	0.723416	0	0
0	802.595	H85 C44 N1 O9 P1	-1.00ppm	PCOx 36:2	0	27653.6	1.54264e+06	20963.4	859051	743852	35745.5	305928	2417949	0	740232	714892	0	0	1.37121e+06	19966.1	1.22333e+06	279050	674155	45610.6	1.40925e+06	88566.3	28197.6	234410	0	0	1.57191e+06	2.88822e+06	24838	0	335909	PCOx 36:2	0.0765192	3.44396	0.0551933	2.18057	1.74222	0.082464	0.750357	6.42071	0	1.88276	1.79946	0	0
0	830.626	H89 C46 N1 O9 P1	-0.78ppm	PCOx 38:2	0	0	28901.7	0	0	0	0	0	84928.4	0	0	0	0	0	25113.4	0	0	0	0	0	0	0	0	19964.3	0	0	0	72562.5	0	0	0	PCOx 38:2	0	0.0645232	0	0	0	0	0	0.225522	0	0	0	0	0
0	742.502	H73 C40 N1 O9 P1	0.91ppm	PCOx 32:4	0	0	0	0	0	0	0	0	33590.7	0	0	0	0	0	0	0	0	0	0	0	20531	0	0	0	0	0	22268.7	22590.7	0	0	0	PCOx 32:4	0	0	0	0	0	0	0	0.089198	0	0	0	0	0
0	716.486	H71 C38 N1 O9 P1	0.57ppm	PCOx 30:3	0	0	25154.5	0	0	0	0	0	47294.7	0	0	0	0	0	17285.1	0	0	0	0	0	32769	0	0	0	0	0	37468	137046	0	0	0	PCOx 30:3	0	0.0561576	0	0	0	0	0	0.125588	0	0	0	0	0
0	772.548	H79 C42 N1 O9 P1	-0.54ppm	PCOx 34:3	0	145424	969821	90298.5	661346	438531	54855.5	319961	1.49941e+06	67020.9	553935	513732	52038.7	0	820828	56192.8	28723	136875	434293	0	857346	102049	0	85356.4	0	40957.1	967974	1.67456e+06	0	0	81937.6	PCOx 34:3	0.402398	2.16513	0.237741	1.67872	1.02711	0.12655	0.784775	3.9816	0.146912	1.40892	1.29312	0.106769	0
0	770.533	H77 C42 N1 O9 P1	-0.26ppm	PCOx 34:4	0	54349.4	189228	106286	200543	159012	32716.5	74026	378727	33188.9	171594	132926	0	0	200378	0	0	0	110344	0	179309	45234.8	0	22312.6	0	0	235702	442236	36461.6	0	31232.2	PCOx 34:4	0.150388	0.422453	0.279833	0.509047	0.372433	0.0754762	0.181565	1.00569	0.072751	0.436444	0.334588	0	0
0	712.454	H67 C38 N1 O9 P1	-1.23ppm	PCOx 30:5	0	0	0	0	0	0	0	0	20186.6	0	0	0	0	0	19202.2	0	0	0	0	0	25310.8	0	0	0	0	0	0	41579	0	0	0	PCOx 30:5	0	0	0	0	0	0	0	0.0536043	0	0	0	0	0
0	744.517	H75 C40 N1 O9 P1	-0.33ppm	PCOx 32:3	0	0	79890.5	0	77872.9	25563.4	0	0	262284	0	62441.8	53623.3	0	0	102894	0	0	0	0	0	120411	0	0	0	0	0	93962.2	251949	0	0	23840.1	PCOx 32:3	0	0.178356	0	0.197668	0.0598737	0	0	0.69648	0	0.158819	0.134975	0	0
0	800.58	H83 C44 N1 O9 P1	-0.43ppm	PCOx 36:3	0	132034	2.06128e+06	25659.2	1.21565e+06	920143	42162.1	523058	3.05198e+06	59284.1	1.06552e+06	1.08071e+06	133009	0	1.67711e+06	0	1.10369e+06	355999	916249	144131	1.76486e+06	90069.7	1.14343e+06	397243	153548	74335.3	1.99716e+06	3.2926e+06	59273.2	160132	413227	PCOx 36:3	0.365345	4.60181	0.0675565	3.08574	2.15513	0.097267	1.28292	8.10434	0.129952	2.71012	2.72027	0.272897	0
0	798.564	H81 C44 N1 O9 P1	-0.09ppm	PCOx 36:4	0	179872	1.15945e+06	138706	960066	810147	135242	531405	1.69532e+06	161902	784215	839572	112205	32528.5	1.12825e+06	126586	1.12422e+06	304710	680711	120190	1.0776e+06	237932	2.12012e+06	281090	105288	85472.6	1.2121e+06	1.97841e+06	81336.2	146370	334046	PCOx 36:4	0.497718	2.58848	0.365191	2.43698	1.8975	0.312	1.30339	4.50183	0.354894	1.99463	2.11329	0.230213	0.0639422
0	796.549	H79 C44 N1 O9 P1	-0.09ppm	PCOx 36:5	0	262635	318895	274501	430440	480782	248544	327439	591912	227759	330434	362218	132110	76426	277650	96637.7	181244	243697	214429	139419	446399	130526	2.15112e+06	173822	46329.1	84484.6	400383	500964	138801	128955	178955	PCOx 36:5	0.726728	0.711934	0.722716	1.09261	1.12607	0.573385	0.803117	1.57179	0.499255	0.84045	0.91174	0.271053	0.150233
0	688.454	H67 C36 N1 O9 P1	-0.70ppm	PCOx 28:3	0	0	179841	0	87531.8	50374.4	0	0	530434	0	115146	53362.6	0	0	217835	0	0	18043	197938	0	362437	0	0	0	0	0	402481	694878	0	0	17364.5	PCOx 28:3	0	0.401497	0	0.222186	0.117985	0	0	1.40853	0	0.292869	0.134319	0	0
0	828.611	H87 C46 N1 O9 P1	-0.52ppm	PCOx 38:3	0	0	216055	0	118534	64617.9	0	32489.2	349165	0	114381	139569	0	0	195046	0	0	27631.7	120364	26773.6	220476	15287.7	31236.9	61496.8	27164.4	0	225864	453456	27601	110708	54085.2	PCOx 38:3	0	0.482345	0	0.30088	0.151346	0	0.079687	0.927186	0	0.290925	0.35131	0	0
0	826.595	H85 C46 N1 O9 P1	-0.61ppm	PCOx 38:4	0	-1.7	584425	36545.9	599383	490042	7912.7	220549	968119	-1.7	562163	515615	44959.8	0	703224	-1.7	48582.1	201070	477643	60294.1	771929	78072.9	53532.2	199384	36467.1	49709.8	698411	1.08546e+06	6034.6	59474.1	180229	PCOx 38:4	-4.70401e-06	1.30473	0.0962195	1.52144	1.14776	0.0182544	0.540945	2.57078	-3.72645e-06	1.42984	1.29786	0.0922452	0
0	824.579	H83 C46 N1 O9 P1	-1.03ppm	PCOx 38:5	0	459023	1.06421e+06	221136	1.06925e+06	1.07279e+06	246225	683072	1.32219e+06	298900	1.02038e+06	1.0478e+06	1.21351e+06	180398	1.04443e+06	378561	2.2382e+06	451024	868953	221742	1126421	279709	2.31685e+06	450374	256391	216172	1.22957e+06	1.48688e+06	285759	365428	541102	PCOx 38:5	1.27015	2.37586	0.582217	2.71412	2.51265	0.568036	1.67539	3.511	0.655197	2.59531	2.63742	2.48978	0.354613
0.0255993	822.564	H81 C46 N1 O9 P1	-0.07ppm	PCOx 38:6	12236.5	355359	547961	337217	589433	708646	257760	515554	740879	266232	531057	647624	235154	183236	614176	129699	239288	329385	570902	305110	627894	263803	2.27796e+06	337414	174641	211380	662618	819802	224010	284772	351077	PCOx 38:6	0.9833	1.22333	0.887838	1.49619	1.65977	0.594646	1.26451	1.96736	0.583588	1.35073	1.63014	0.482472	0.360193
0.070107	820.548	H79 C46 N1 O9 P1	-0.64ppm	PCOx 38:7	30968.2	522893	217008	560440	410340	526079	378428	466166	270979	482298	396431	311730	276854	247173	236962	247214	485007	341188	329448	375105	343784	388397	2.39891e+06	391135	261868	348260	307557	339785	483840	458374	448182	PCOx 38:7	1.44688	0.484471	1.47555	1.04158	1.23216	0.873025	1.14338	0.719567	1.05721	1.00831	0.784656	0.568028	0.485875
0	854.626	H89 C48 N1 O9 P1	-0.58ppm	PCOx 40:4	0	0	100066	0	55816.1	123787	0	0	206447	0	0	86677	0	0	111066	0	0	0	121436	0	186202	0	0	0	0	19133.6	182530	214716	0	0	37877.8	PCOx 40:4	0	0.223397	0	0.141681	0.289929	0	0	0.548208	0	0	0.218175	0	0
0	852.611	H87 C48 N1 O9 P1	-0.70ppm	PCOx 40:5	0	-1.8	209514	12170.6	352267	295095	0	140779	399501	27131.8	195814	313670	0	0	299401	0	26867.2	106412	195842	24312.6	332876	0	0	125947	40797.3	21658	322064	363685	18731.1	18201	99187.6	PCOx 40:5	-4.98071e-06	0.467742	0.0320432	0.894175	0.691161	0	0.345292	1.06085	0.0594737	0.498046	0.78954	0	0
0	850.594	H85 C48 N1 O9 P1	-1.44ppm	PCOx 40:6	0	109668	325592	56352.3	396820	462989	27617.8	220222	439684	37100.1	352002	433477	426903	0	408089	0	61816.1	164591	429796	47660	459115	34463.2	36667.9	116590	70387.9	23321.5	441740	527514	36355	54546.1	168499	PCOx 40:6	0.303459	0.726887	0.148367	1.00727	1.0844	0.0637136	0.540144	1.16755	0.0813245	0.895305	1.09111	0.875889	0
0	848.58	H83 C48 N1 O9 P1	-0.60ppm	PCOx 40:7	0	94105.9	222105	23775.2	232533	312653	0	166249	286274	12885.9	253939	294950	0	0	295046	64735.6	57434.9	32158.5	251824	6471.3	283515	63334.7	12128	85966.6	48684.9	0	317330	294804	38178.9	16396.8	85016.1	PCOx 40:7	0.260397	0.49585	0.0625963	0.59025	0.732285	0	0.407764	0.760183	0.0282463	0.645886	0.742419	0	0
0	846.563	H81 C48 N1 O9 P1	-1.32ppm	PCOx 40:8	0	37062.6	48211.1	87989.5	109408	81022.4	68741.6	152192	61501	52243.4	68372.1	126551	126223	0	94436.4	43169.6	30648.5	93779.9	113373	52213.8	84081.7	53231.3	81690.3	43580.4	97904.1	43848.9	71905.5	125705	45123.2	68062.9	32640.8	PCOx 40:8	0.102555	0.107632	0.231662	0.277715	0.189768	0.158585	0.373284	0.163312	0.114519	0.173902	0.318542	0.258975	0
0	844.547	H79 C48 N1 O9 P1	-1.76ppm	PCOx 40:9	0	121170	27771.4	145184	42962.4	0	128556	52383.8	19015.3	91376.8	21110.9	0	0	36339.6	0	46875.5	2.11448e+06	54896.6	37986.3	103796	33580.3	93555.3	133621	43053.6	95995.9	99762.7	55856.4	0	69191.8	115137	64736.8	PCOx 40:9	0.335286	0.0619998	0.382247	0.109053	0	0.296576	0.128483	0.0504939	0.200301	0.0536949	0	0	0.0714338
0	870.564	H81 C50 N1 O9 P1	-0.50ppm	PCOx 42:10	0	84151.2	2646.9	180886	10562.8	75092.4	100407	176472	18458.1	101779	51083.8	16181.3	76679.6	58331.5	7879.6	43766.4	2.12233e+06	116857	82260.9	118807	15708	122954	115950	87943.7	165319	184218	98454.4	9006.5	154613	153678	114434	PCOx 42:10	0.232852	0.00590922	0.476243	0.026812	0.175879	0.231636	0.432838	0.0490143	0.223103	0.12993	0.04073	0.157325	0.114664
0	868.548	H79 C50 N1 O9 P1	-1.36ppm	PCOx 42:11	0	188757	0	238818	23057.1	101256	109764	105607	110131	80903.7	70918.2	0	40918.4	49172.7	21957.3	46584.7	321284	129050	49092.2	285596	99675.6	111469	318630	219028	162316	259829	38042.9	107995	218007	403173	253686	PCOx 42:11	0.522301	0	0.628769	0.0585269	0.237159	0.253223	0.259024	0.292447	0.177343	0.180378	0	0.0839533	0.0966602
0	872.58	H83 C50 N1 O9 P1	0.06ppm	PCOx 42:9	0	50846	41261.5	0	0	0	19516.2	0	30235.5	-1.8	13360.6	87969.3	0	4332.6	0	20984	0	0	0	0	54044.1	0	0	22519.9	106172	-1.8	0	69526.2	0	-1.8	-1.8	PCOx 42:9	0.140694	0.0921165	0	0	0	0.0450234	0	0.0802885	-3.94565e-06	0.0339823	0.221428	0	0.00851672
0	748.549	H79 C40 N1 O9 P1	1.09ppm	PCOx 32:1	0	1.02841e+06	676445	960942	1.7095e+06	1.51323e+06	797354	976400	1.29936e+06	708602	1.11379e+06	920200	382927	353318	853722	414980	622827	694621	685830	462662	878921	848100	468079	497273	211175	274117	700188	1287490	289941	325074	318062	PCOx 32:1	2.84568	1.51017	2.53001	4.33931	3.54424	1.83948	2.39484	3.45037	1.55328	2.8329	2.31624	0.785662	0.694527
0	804.611	H87 C44 N1 O9 P1	-0.78ppm	PCOx 36:1	0	0	131839	0	81181.4	42983.2	0	0	299024	0	66921.9	0	65250.8	0	140104	0	0	13925.3	0	0	151267	0	0	0	0	0	157807	399934	0	0	29396.4	PCOx 36:1	0	0.294331	0	0.206067	0.100674	0	0	0.794039	0	0.170214	0	0.133877	0
	###	PhosphatidylcholineOx2																																			0	0	0	0	0	0	0	0	0	0	0	0	0
0	706.466	H69 C36 N1 O10 P1	0.54ppm	PCOx2 28:2	0	0	14761.8	0	0	0	0	0	90470.7	0	0	0	0	0	0	0	0	0	0	0	40147.3	0	0	0	0	0	31806.4	82707.5	0	0	0	PCOx2 28:2	0	0.0329558	0	0	0	0	0	0.240239	0	0	0	0	0
0	734.497	H73 C38 N1 O10 P1	0.17ppm	PCOx2 30:2	0	0	0	0	0	0	0	0	26644.1	0	0	0	0	0	17057.8	0	0	0	0	0	0	0	0	0	0	0	0	0	0	0	0	PCOx2 30:2	0	0	0	0	0	0	0	0.0707517	0	0	0	0	0
0	762.529	H77 C40 N1 O10 P1	0.65ppm	PCOx2 32:2	0	0	315230	0	77712.9	57340.2	0	0	611778	0	212055	55629.2	0	0	282213	0	0	0	34671.3	0	376070	0	0	0	0	0	403296	784635	0	0	0	PCOx2 32:2	0	0.703752	0	0.197262	0.1343	0	0	1.62454	0	0.539354	0.140024	0	0
0	790.559	H81 C42 N1 O10 P1	0.05ppm	PCOx2 34:2	0	0	2.12861e+06	0	1.06433e+06	709371	0	190619	3.62642e+06	0	1.10536e+06	728592	52132.3	0	1881128	0	0	98984.1	667974	0	2.02698e+06	17944.9	0	63213.8	96777.5	0	2.27401e+06	4.80035e+06	0	58400.4	56974.5	PCOx2 34:2	0	4.75212	0	2.70163	1.66146	0	0.467537	9.62974	0	2.81144	1.83394	0.106961	0
0	818.59	H85 C44 N1 O10 P1	-0.16ppm	PCOx2 36:2	0	0	2.77178e+06	0	1149311	860350	0	248484	5.33661e+06	0	1.29444e+06	892823	0	0	2.79685e+06	0	0	228570	1.05847e+06	0	3.03404e+06	0	0	96534.5	20699.8	0	3.34841e+06	6.82948e+06	0	0	118189	PCOx2 36:2	0	6.18802	0	2.91735	2.01508	0	0.609464	14.171	0	3.29236	2.24733	0	0
0	846.622	H89 C46 N1 O10 P1	-0.33ppm	PCOx2 38:2	0	0	31253.8	0	31597.1	0	0	0	196607	0	0	0	0	0	122999	0	0	0	12842.5	0	83002.9	0	0	0	0	0	113805	292422	0	0	0	PCOx2 38:2	0	0.0697743	0	0.0802044	0	0	0	0.522078	0	0	0	0	0
0	792.574	H83 C42 N1 O10 P1	-0.61ppm	PCOx2 34:1	0	0	1.91094e+06	0	720308	494729	0	78994.2	3.50068e+06	0	812930	528382	0	0	1.68948e+06	0	0	96112.4	650309	0	1.80163e+06	0	0	68373.2	0	0	2244042	5.02606e+06	0	0	82433.1	PCOx2 34:1	0	4.26618	0	1.82839	1.15874	0	0.193751	9.29583	0	2.06766	1.32999	0	0
0	736.513	H75 C38 N1 O10 P1	0.55ppm	PCOx2 30:1	0	0	35574.7	0	12189.3	0	0	0	74905.3	0	0	0	0	0	0	0	0	0	0	0	0	0	0	0	0	0	18207.1	114239	0	0	0	PCOx2 30:1	0	0.0794207	0	0.0309407	0	0	0	0.198906	0	0	0	0	0
0	820.61	H87 C44 N1 O10 P1	4.51ppm	PCOx2 36:1	0	72499.8	110918	127169	0	98000	188601	147312	364505	148354	33667.3	0	174000	99313.5	71251.4	63793.6	2119693	42910.9	35057.5	124267	132790	136574	38347.3	48063.7	94443.1	47670.6	123202	506656	119316	64270.5	64126.9	PCOx2 36:1	0.200611	0.247625	0.334815	0	0.229532	0.435098	0.361316	0.96792	0.325196	0.0856317	0	0.357	0.195223
0.218489	764.544	H79 C40 N1 O10 P1	0.09ppm	PCOx2 32:1	52295.6	0	690504	11770.5	356972	254083	0	28913.2	1246826	0	332266	186450	0	21362.9	609480	0	0	28606.3	264045	0	610351	0	0	0	0	0	748601	1.70037e+06	0	56713.3	33211.6	PCOx2 32:1	0	1.54156	0.0309898	0.906119	0.595103	0	0.0709161	3.31087	0	0.845108	0.469315	0	0.0419937
0	788.543	H79 C42 N1 O10 P1	-1.14ppm	PCOx2 34:3	0	17244.2	683101	0	401184	294959	28464.2	155924	1.07972e+06	29622.8	405658	293838	0	56908.9	639744	16061.3	259202	147840	249485	26881.4	635717	0	0	123922	0	0	734012	1.32292e+06	15980.8	57533.5	88625.9	PCOx2 34:3	0.0477158	1.52503	0	1.01834	0.690842	0.0656662	0.382438	2.86714	0.0649341	1.03178	0.739622	0	0.111867
0	786.528	H77 C42 N1 O10 P1	0.40ppm	PCOx2 34:4	0	0	38534.9	0	0	0	0	0	141574	0	0	0	0	0	32149.8	0	0	0	0	0	38430.5	0	0	0	0	0	25297.1	247269	0	0	0	PCOx2 34:4	0	0.0860294	0	0	0	0	0	0.37594	0	0	0	0	0
0	816.574	H83 C44 N1 O10 P1	-0.64ppm	PCOx2 36:3	0	64748.5	2.39202e+06	46790.7	1.29277e+06	910845	0	401313	3.76722e+06	0	1.20928e+06	1.02835e+06	24375	0	2.3138e+06	33438.6	67311.2	329012	1.01831e+06	31660.6	2.59185e+06	97803.2	23101	255409	46295.3	0	2.62562e+06	4.72563e+06	0	33320.6	242759	PCOx2 36:3	0.179163	5.3402	0.123192	3.2815	2.13335	0	0.984309	10.0036	0	3.07578	2.58848	0.0500108	0
0	814.559	H81 C44 N1 O10 P1	-0.38ppm	PCOx2 36:4	0	49449.5	1.25595e+06	0	880855	725451	24718.5	312883	1.93978e+06	43026.1	754888	781870	25342.8	0	1.30426e+06	26704.5	25861.4	248623	680285	23765.8	1.37335e+06	90036.4	41635.3	204181	26661.4	22082.7	1.38781e+06	2.28792e+06	18902.8	31970.8	234762	PCOx2 36:4	0.13683	2.80393	0	2.23592	1.69913	0.057025	0.767415	5.15096	0.0943145	1.92003	1.96805	0.0519965	0
0	812.543	H79 C44 N1 O10 P1	-0.76ppm	PCOx2 36:5	0	87499.2	386232	59939.1	313446	239273	77291.6	113436	551793	67609.8	295742	231877	256552	33663.6	472160	25083.6	95171.8	127056	288425	80991.3	383508	74195.4	53304.7	99513.5	102844	51840.5	488530	676778	71510.7	85172.7	129992	PCOx2 36:5	0.242116	0.862266	0.15781	0.795635	0.560416	0.17831	0.278227	1.46525	0.148203	0.752212	0.583659	0.526374	0.0661735
0	810.527	H77 C44 N1 O10 P1	-1.27ppm	PCOx2 36:6	0	0	81865.2	0	52750.5	0	0	0	156952	0	0	54124	0	0	48898.6	0	0	20052.8	28420.1	0	105230	0	0	0	64346.9	0	95058.9	132065	0	19980.4	0	PCOx2 36:6	0	0.182765	0	0.133899	0	0	0	0.416776	0	0	0.136236	0	0
0	844.606	H87 C46 N1 O10 P1	-0.50ppm	PCOx2 38:3	0	0	328739	0	168894	33699.2	0	-1.7	624128	0	153017	88629.6	0	0	265948	0	0	8710	221042	25301.4	366376	0	0	-1.7	-1.7	13728.5	404855	787106	0	17619	-1.7	PCOx2 38:3	0	0.733912	0	0.428713	0.0789291	0	-4.16963e-06	1.65733	0	0.389194	0.22309	0	0
0	842.59	H85 C46 N1 O10 P1	-0.42ppm	PCOx2 38:4	0	36150.5	1.34433e+06	22700.1	962430	910849	18834.1	325125	2.09076e+06	48160.1	881116	894760	0	0	1.44861e+06	33871.6	21634.2	273749	775796	70330.8	1.56619e+06	51685.6	71917.1	234218	102704	33364.8	1.71927e+06	2.65065e+06	55434	26684.1	168555	PCOx2 38:4	0.100031	3.00123	0.0597657	2.44298	2.13336	0.0434498	0.797441	5.55189	0.105568	2.24109	2.2522	0	0
0	840.575	H83 C46 N1 O10 P1	0.15ppm	PCOx2 38:5	0	64742.1	1.28274e+06	0	990464	909737	16775.8	387271	2.06183e+06	66572.8	897700	844008	0	38015.3	1.42098e+06	15525.2	23693.8	314355	1.06613e+06	0	1.70699e+06	64150	0	204911	85522.5	25253.3	1.688e+06	2319074	0	45797.5	187539	PCOx2 38:5	0.179145	2.86373	0	2.51414	2.13075	0.0387014	0.949868	5.47505	0.14593	2.28327	2.12446	0	0.0747278
0	838.558	H81 C46 N1 O10 P1	-0.97ppm	PCOx2 38:6	0	108210	636808	56173.4	427958	444252	107974	282591	957974	63389.3	453318	403805	178624	47449	631683	114994	92503.4	263393	498138	139874	734368	66936.5	125110	184110	96981.6	83206.6	765540	1.10158e+06	111305	192284	242222	PCOx2 38:6	0.299423	1.42168	0.147896	1.08631	1.04051	0.249094	0.693117	2.54384	0.138951	1.153	1.01642	0.366488	0.0932719
0	836.543	H79 C46 N1 O10 P1	-0.79ppm	PCOx2 38:7	0	20949.3	179226	35102.9	58655.8	33430.4	63464.1	21131.6	175943	0	88069.4	71555	0	20572.2	188068	43643.8	46960.7	55985.5	116288	36787	163914	22538.9	24582.6	29178.3	122742	43808.1	126902	259181	51157.8	92882.8	60175.4	PCOx2 38:7	0.057968	0.400124	0.0924203	0.148889	0.0782995	0.14641	0.05183	0.467205	0	0.224002	0.180111	0	0.0404394
0	872.637	H91 C48 N1 O10 P1	-0.55ppm	PCOx2 40:3	0	0	23427.7	0	29385.3	0	0	0	71804.3	0	0	0	0	0	78811.6	0	0	0	0	0	59026.2	0	0	0	0	0	58827	123914	0	0	0	PCOx2 40:3	0	0.0523025	0	0.0745901	0	0	0	0.190672	0	0	0	0	0
0	870.621	H89 C48 N1 O10 P1	-0.60ppm	PCOx2 40:4	0	0	142132	0	114709	36075.2	0	-1.8	208532	0	29731.5	84772.5	0	0	129565	0	0	0	52701.3	0	144417	0	0	0	0	0	191444	326900	0	0	0	PCOx2 40:4	0	0.317311	0	0.291172	0.0844941	0	-4.4149e-06	0.553742	0	0.0756211	0.213381	0	0
0	868.606	H87 C48 N1 O10 P1	-0.53ppm	PCOx2 40:5	0	0	477121	0	377549	315251	0	142330	706155	0	302181	298839	0	0	576352	17349.3	17125.2	66261.9	364723	0	648511	25975.8	18122	122368	32601.2	0	623414	805223	19086.5	43838.7	103241	PCOx2 40:5	0	1.06518	0	0.95835	0.738369	0	0.349096	1.87515	0	0.768588	0.752208	0	0
0	866.59	H85 C48 N1 O10 P1	-0.84ppm	PCOx2 40:6	0	0	456831	0	341074	418704	0	150099	746614	23952.9	329881	338599	322571	20862.7	560399	14418.2	47949.4	160162	374303	28971.2	580256	42076.5	24005.6	157118	67119.5	0	646922	790514	33005.4	0	39906.7	PCOx2 40:6	0	1.01988	0	0.865765	0.980673	0	0.368152	1.98259	0.0525055	0.839042	0.852288	0.661828	0.0410104
0	864.574	H83 C48 N1 O10 P1	-0.57ppm	PCOx2 40:7	0	0	258012	0	216502	173864	0	71810.2	430853	0	213280	208693	0	0	348500	17011.7	0	78462.7	223873	0	424775	13701.5	0	0	0	0	323235	395701	0	0	0	PCOx2 40:7	0	0.576013	0	0.549557	0.407219	0	0.17613	1.1441	0	0.542472	0.525301	0	0
0	704.45	H67 C36 N1 O10 P1	0.18ppm	PCOx2 28:3	0	0	64246.3	0	18154.3	0	0	0	186852	0	18711.8	0	0	0	27326.2	0	0	0	37709.2	0	72248.7	0	0	0	0	0	51833.5	212393	0	0	0	PCOx2 28:3	0	0.14343	0	0.0460819	0	0	0	0.496174	0	0.0475929	0	0	0
0	702.434	H65 C36 N1 O10 P1	-0.62ppm	PCOx2 28:4	0	0	30823.3	0	0	0	0	0	60476.8	0	17487	0	0	0	0	0	0	0	20810	0	34228.7	0	0	0	0	0	42055.7	144000	0	0	0	PCOx2 28:4	0	0.0688132	0	0	0	0	0	0.160592	0	0.0444776	0	0	0
0	794.59	H85 C42 N1 O10 P1	-1.08ppm	PCOx2 34:0	0	0	46796	0	0	0	0	0	64579.1	0	0	0	0	0	0	0	0	0	0	0	0	0	0	0	0	0	47216.4	163218	0	0	0	PCOx2 34:0	0	0.104472	0	0	0	0	0	0.171486	0	0	0	0	0
	###	PhosphatidylcholineOx3																																			0	0	0	0	0	0	0	0	0	0	0	0	0
0	806.553	H81 C42 N1 O11 P1	-1.14ppm	PCOx3 34:2	0	0	0	0	0	0	0	0	284702	0	0	0	0	0	0	0	0	0	0	0	0	0	0	0	0	0	0	407608	0	0	0	PCOx3 34:2	0	0	0	0	0	0	0	0.756008	0	0	0	0	0
0	834.585	H85 C44 N1 O11 P1	-0.65ppm	PCOx3 36:2	0	0	160141	0	0	0	0	0	377267	0	0	0	0	0	0	0	0	0	0	0	0	0	0	0	0	0	0	732459	0	0	0	PCOx3 36:2	0	0.357516	0	0	0	0	0	1.00181	0	0	0	0	0
0	778.523	H77 C40 N1 O11 P1	-0.32ppm	PCOx3 32:2	0	0	42912.5	0	0	0	0	0	111828	0	0	0	0	0	17056.5	0	0	0	0	0	24450	0	0	0	0	0	33814.6	153894	0	0	0	PCOx3 32:2	0	0.0958024	0	0	0	0	0	0.296953	0	0	0	0	0
0	776.507	H75 C40 N1 O11 P1	-0.21ppm	PCOx3 32:3	0	0	20700.5	0	0	0	0	0	53801.5	0	0	0	0	0	22515.8	0	0	0	0	0	0	0	0	0	19828.3	0	25100.5	86397.1	0	0	0	PCOx3 32:3	0	0.046214	0	0	0	0	0	0.142867	0	0	0	0	0
0	774.49	H73 C40 N1 O11 P1	-1.53ppm	PCOx3 32:4	0	0	0	0	0	0	0	0	0	0	0	0	0	0	0	0	0	0	0	0	0	0	0	0	0	0	23014	26875.3	0	0	0	PCOx3 32:4	0	0	0	0	0	0	0	0	0	0	0	0	0
0	800.507	H75 C42 N1 O11 P1	-0.81ppm	PCOx3 34:5	0	0	45141.1	0	0	0	0	0	49538	0	0	0	0	0	0	0	0	0	0	0	0	0	0	0	0	0	22472.5	117432	0	0	0	PCOx3 34:5	0	0.100778	0	0	0	0	0	0.131545	0	0	0	0	0
-2.45647e-05	804.538	H79 C42 N1 O11 P1	-0.14ppm	PCOx3 34:3	-1.7	0	225549	0	90130.8	22133.5	0	0	359396	0	101101	38657.7	0	0	214717	0	0	-1.7	0	0	248370	0	0	0	0	0	212048	558660	0	0	5386.6	PCOx3 34:3	0	0.503539	0	0.228783	0.0518403	0	0	0.954355	0	0.257147	0.0973054	0	0
0	802.522	H77 C42 N1 O11 P1	-0.56ppm	PCOx3 34:4	0	0	132569	0	0	0	0	0	233272	0	20053	0	0	0	50769	0	0	0	0	0	105718	0	0	0	0	0	119507	316183	0	0	0	PCOx3 34:4	0	0.295962	0	0	0	0	0	0.61944	0	0.0510042	0	0	0
1.66157	832.57	H83 C44 N1 O11 P1	0.17ppm	PCOx3 36:3	524186	0	1.10485e+06	0	485143	301509	0	38786.6	1.58526e+06	0	400428	336184	0	110604	943592	0	0	0	269530	0	848851	0	0	0	0	0	1061670	1.97789e+06	0	0	0	PCOx3 36:3	0	2.46658	0	1.23146	0.706184	0	0.0951328	4.20955	0	1.01848	0.846209	0	0.217418
0	830.554	H81 C44 N1 O11 P1	-0.17ppm	PCOx3 36:4	0	13167.6	979579	0	581474	443811	0	139650	1.4388e+06	0	542043	433957	0	0	834338	0	0	120118	431744	0	873891	0	0	79094.5	0	0	935115	1.71169e+06	0	0	72823.8	PCOx3 36:4	0.0364356	2.18692	0	1.47598	1.03948	0	0.342523	3.82064	0	1.37867	1.09232	0	0
0	828.538	H79 C44 N1 O11 P1	-1.03ppm	PCOx3 36:5	0	0	416496	0	211652	177879	0	23921.1	817647	0	175258	162337	0	0	403314	0	0	0	92573.7	0	488068	0	0	24506.8	0	0	514639	915087	0	0	0	PCOx3 36:5	0	0.929829	0	0.537247	0.416622	0	0.0586718	2.17121	0	0.445762	0.40862	0	0
0	826.522	H77 C44 N1 O11 P1	-0.83ppm	PCOx3 36:6	0	0	60477.7	0	0	23572.3	0	0	234207	0	41114	51497.8	0	0	77670.5	0	0	0	0	0	68625.6	0	0	0	0	0	97513.1	258787	0	0	0	PCOx3 36:6	0	0.135017	0	0	0.0552102	0	0	0.621923	0	0.104572	0.129625	0	0
0	860.601	H87 C46 N1 O11 P1	-0.52ppm	PCOx3 38:3	0	0	377074	0	78406	36623.9	0	0	507696	0	62548.8	20150.1	0	0	236562	0	0	0	20224.2	0	227301	0	0	0	0	0	279771	529157	0	0	0	PCOx3 38:3	0	0.84182	0	0.199022	0.0857792	0	0	1.34816	0	0.159091	0.0507199	0	0
0	858.587	H85 C46 N1 O11 P1	1.28ppm	PCOx3 38:4	0	0	1.13168e+06	-1.7	713643	354773	0	-1.7	1.57681e+06	0	590802	456746	-1.7	-1.7	945608	0	-1.7	-1.7	333284	0	1.01013e+06	-1.7	0	-1.7	-1.7	0	1048232	1.81139e+06	-1.7	0	-1.7	PCOx3 38:4	0	2.52649	-4.47583e-06	1.81147	0.830937	0	-4.16963e-06	4.18711	0	1.50269	1.14968	-3.48793e-06	-3.34174e-06
0	856.569	H83 C46 N1 O11 P1	-0.45ppm	PCOx3 38:5	0	15182	1.47619e+06	0	998180	766275	0	290007	2.18162e+06	0	831543	812657	0	0	1.34829e+06	0	0	144311	699167	0	1.51103e+06	21575.6	0	87781.6	27864.9	0	1.42645e+06	2.50728e+06	0	0	157837	PCOx3 38:5	0.0420095	3.2956	0	2.53373	1.79474	0	0.711306	5.79317	0	2.115	2.04554	0	0
0	854.554	H81 C46 N1 O11 P1	-0.37ppm	PCOx3 38:6	0	0	858490	0	533327	360213	0	97170.8	1.1776e+06	0	423175	445958	0	0	792382	14549.2	0	80161.3	428891	0	776541	0	0	49207.2	25262.7	0	911872	1.38123e+06	0	0	72021.4	PCOx3 38:6	0	1.91658	0	1.35377	0.843678	0	0.238333	3.12705	0	1.07633	1.12252	0	0
0	852.537	H79 C46 N1 O11 P1	-1.39ppm	PCOx3 38:7	0	0	127241	0	86226.6	0	0	21866.9	284635	0	93299.1	87892.2	0	0	140022	0	0	0	47968.9	0	191433	0	0	26616.5	274156	0	201236	390294	0	0	0	PCOx3 38:7	0	0.284066	0	0.218873	0	0	0.0536334	0.755831	0	0.237303	0.221234	0	0
0	886.617	H89 C48 N1 O11 P1	0.52ppm	PCOx3 40:4	0	0	180410	0	35439	0	0	0	336540	25588.6	29335.8	57515.6	0	0	155460	0	25418.7	0	0	0	117666	0	0	0	0	0	201981	326519	0	0	0	PCOx3 40:4	0	0.402767	0	0.0899565	0	0	0	0.89366	0.056091	0.0746147	0.144773	0	0
0	884.603	H87 C48 N1 O11 P1	1.94ppm	PCOx3 40:5	0	0	395984	41465.5	276562	143405	28500.3	0	626835	0	119915	177050	0	22605.4	415304	0	25343.8	0	39382.1	25200.5	395392	0	0	0	37967.1	0	445772	812646	0	0	0	PCOx3 40:5	0	0.884037	0.109172	0.702011	0.335879	0.0657495	0	1.66452	0	0.305001	0.445653	0	0.0444361
0	882.584	H85 C48 N1 O11 P1	-1.48ppm	PCOx3 40:6	0	0	501553	10865.7	308883	322787	0	36921.9	730484	0	226154	248064	0	12617.7	522990	0	0	54110.2	276784	0	557049	0	0	29999.8	0	0	561489	893195	0	0	0	PCOx3 40:6	0	1.11972	0.0286076	0.784053	0.75602	0	0.0905592	1.93975	0	0.575216	0.624402	0	0.024803
0	880.569	H83 C48 N1 O11 P1	-0.77ppm	PCOx3 40:7	0	0	337833	0	240005	98209.8	0	0	476728	0	178016	177842	0	0	328344	0	0	15996.2	173687	0	358577	0	0	0	0	0	368023	522998	0	0	0	PCOx3 40:7	0	0.754215	0	0.609216	0.230024	0	0	1.26592	0	0.452777	0.447648	0	0
0	878.553	H81 C48 N1 O11 P1	-0.97ppm	PCOx3 40:8	0	0	41999.1	0	15789.7	0	0	0	132651	0	36354	0	0	0	38095.2	0	31189.7	49692.5	28388.5	0	106558	0	0	0	0	0	114125	126306	0	63345.8	0	PCOx3 40:8	0	0.0937632	0	0.0400797	0	0	0	0.352247	0	0.0924652	0	0	0
0	718.429	H65 C36 N1 O11 P1	-0.58ppm	PCOx3 28:4	0	0	41324.7	0	0	0	0	0	85637.4	0	0	0	0	0	0	0	0	0	0	0	32199.9	0	0	0	0	0	49533.7	167393	0	0	0	PCOx3 28:4	0	0.0922576	0	0	0	0	0	0.227405	0	0	0	0	0
1.87723	746.46	H69 C38 N1 O11 P1	-0.40ppm	PCOx3 30:4	22134.6	0	14315.7	0	18826.7	0	0	0	76671	0	0	0	0	0	23663.3	14628.1	0	0	0	0	45739.8	0	0	0	0	0	46251.7	113636	0	0	0	PCOx3 30:4	0	0.0319599	0	0.0477887	0	0	0	0.203595	0	0	0	0	0
	###	PhosphatidylcholineOx4																																			0	0	0	0	0	0	0	0	0	0	0	0	0
	792.501	H75 C40 N1 O12 P1	-1.67ppm	PCOx4 32:3	0	0	0	0	0	0	0	0	35662.4	0	0	0	0	0	0	0	0	0	0	0	0	0	0	0	0	0	39795.3	62288	0	0	0	PCOx4 32:3	0	0	0	0	0	0	0	0.0946993	0	0	0	0	0
	790.485	H73 C40 N1 O12 P1	-1.73ppm	PCOx4 32:4	0	0	33021.6	0	0	0	0	0	30353	0	0	0	21209	0	0	0	0	0	0	0	0	0	0	0	0	0	39595.4	29626.9	0	0	0	PCOx4 32:4	0	0.0737209	0	0	0	0	0	0.0806005	0	0	0	0.043515	0
	788.469	H71 C40 N1 O12 P1	-1.92ppm	PCOx4 32:5	0	0	0	0	0	0	0	0	0	0	0	0	0	0	0	0	0	0	0	0	0	0	0	0	0	0	0	70121	0	0	0	PCOx4 32:5	0	0	0	0	0	0	0	0	0	0	0	0	0
	820.533	H79 C42 N1 O12 P1	-0.33ppm	PCOx4 34:3	0	0	360771	0	74270.4	89522.1	0	21964.5	377683	15944.2	79698.1	25693.2	0	18575.4	280298	30887.4	0	22829.6	191537	35635.5	220199	0	0	27699.8	0	0	305226	531839	33855.1	0	0	PCOx4 34:3	0	0.805424	0	0.188524	0.209675	0	0.0538728	1.00291	0.0349502	0.20271	0.0646725	0	0.0365142
	818.517	H77 C42 N1 O12 P1	-0.73ppm	PCOx4 34:4	-1.7	0	49735.6	0	7071.7	0	0	0	125688	0	9794.6	12332.6	0	0	49852.4	0	0	0	0	0	11023.8	0	0	0	0	0	34279.6	195296	0	0	0	PCOx4 34:4	0	0.111035	0	0.0179504	0	0	0	0.333756	0	0.0249122	0.0310424	0	0
	848.564	H83 C44 N1 O12 P1	-0.34ppm	PCOx4 36:3	0	0	868971	18673	366459	224701	0	26931.8	1.44879e+06	0	399936	297275	0	0	782225	21423.5	0	89086.3	292512	0	864121	0	0	69648.5	0	0	984730	2.04043e+06	0	0	0	PCOx4 36:3	0	1.93998	0.049163	0.9302	0.526288	0	0.0660562	3.84718	0	1.01723	0.748271	0	0
	846.549	H81 C44 N1 O12 P1	0.18ppm	PCOx4 36:4	38863.7	0	1.15099e+06	0	652759	431920	0	56914	1.69235e+06	0	562128	422052	0	14539.5	973778	0	0	22031.1	471545	0	1.07654e+06	0	0	46689.5	0	0	1.14374e+06	2.17305e+06	0	0	25468.3	PCOx4 36:4	0	2.56958	0	1.65693	1.01163	0	0.139594	4.49392	0	1.42975	1.06235	0	0.0285807
	844.535	H79 C44 N1 O12 P1	1.44ppm	PCOx4 36:5	0	-1.7	313832	0	76161	48051.5	-1.7	0	455064	-1.7	83004.2	20617.8	0	-1.7	253630	-1.7	0	0	63875.2	0	245207	-1.7	0	0	-1.7	0	281935	602584	0	4294.4	0	PCOx4 36:5	-4.70401e-06	0.700632	0	0.193323	0.112545	-3.92186e-06	0	1.20839	-3.72645e-06	0.211119	0.0518971	0	-3.34174e-06
	876.596	H87 C46 N1 O12 P1	-0.45ppm	PCOx4 38:3	0	0	335742	0	83361.3	56329.8	0	0	593414	0	96958	0	0	0	242943	0	0	0	80580.5	0	321344	0	0	0	0	0	299145	715280	0	0	0	PCOx4 38:3	0	0.749546	0	0.2116	0.131934	0	0	1.57577	0	0.24661	0	0	0
	874.58	H85 C46 N1 O12 P1	-0.57ppm	PCOx4 38:4	0	0	1.53765e+06	0	854646	607143	0	219884	2.39349e+06	0	802841	656514	0	0	1.56807e+06	0	0	172930	731977	0	1.73753e+06	31863.4	0	126491	0	0	1.78946e+06	3.26844e+06	0	0	104713	PCOx4 38:4	0	3.4328	0	2.16939	1.42203	0	0.539313	6.35576	0	2.042	1.65251	0	0
	872.564	H83 C46 N1 O12 P1	-0.88ppm	PCOx4 38:5	0	0	1.68198e+06	0	937396	764306	0	252798	2.41903e+06	0	939802	754980	0	0	1.52641e+06	18991.6	0	206658	891861	0	1.75294e+06	0	0	127570	0	0	1.65906e+06	2.82107e+06	0	0	135472	PCOx4 38:5	0	3.75503	0	2.37944	1.79013	0	0.620043	6.42359	0	2.39036	1.90036	0	0
	870.548	H81 C46 N1 O12 P1	-1.14ppm	PCOx4 38:6	0	23779	795084	0	397742	202566	0	129038	965554	0	310953	302212	0	63148.9	695607	0	140670	119882	345824	38614.4	664366	0	68808.7	82916.1	37569	176077	628928	1.08143e+06	66774.8	79297.5	0	PCOx4 38:6	0.065798	1.77503	0	1.00961	0.474443	0	0.316493	2.56397	0	0.7909	0.7607	0	0.124134
	868.533	H79 C46 N1 O12 P1	-1.05ppm	PCOx4 38:7	0	0	92306.8	0	46892.1	0	0	0	200371	0	53142.8	23050.2	0	0	113079	0	0	0	16135.8	0	85850.6	0	0	0	0	0	49567.7	226822	0	0	0	PCOx4 38:7	0	0.206075	0	0.119028	0	0	0	0.532072	0	0.135167	0.0580197	0	0
	904.628	H91 C48 N1 O12 P1	0.18ppm	PCOx4 40:3	0	0	22158.7	0	0	0	0	0	43565.3	0	0	0	0	0	0	0	0	0	0	0	0	0	0	0	0	0	0	28285.9	0	0	0	PCOx4 40:3	0	0.0494694	0	0	0	0	0	0.115685	0	0	0	0	0
	902.611	H89 C48 N1 O12 P1	-0.26ppm	PCOx4 40:4	0	0	272619	0	124880	107074	0	0	516163	0	137037	133312	0	0	300113	0	0	0	71622.3	0	361867	0	0	0	0	0	372241	615940	0	0	0	PCOx4 40:4	0	0.608623	0	0.31699	0.250784	0	0	1.37064	0	0.348549	0.335559	0	0
	900.596	H87 C48 N1 O12 P1	-0.51ppm	PCOx4 40:5	0	0	566064	0	314297	217890	0	33878.6	846064	0	279853	245214	0	0	547863	0	0	0	304366	0	697371	0	0	0	0	0	595324	1.00888e+06	0	0	19340.6	PCOx4 40:5	0	1.26374	0	0.797795	0.510334	0	0.0830948	2.24667	0	0.711797	0.61723	0	0
	898.58	H85 C48 N1 O12 P1	-0.80ppm	PCOx4 40:6	0	0	557131	0	304526	298943	0	31811.2	922499	0	235777	242315	36201.5	0	606093	0	0	55993.4	357534	0	669375	0	0	0	0	0	627242	931733	0	0	69388.7	PCOx4 40:6	0	1.2438	0	0.772993	0.700173	0	0.078024	2.44964	0	0.599692	0.609931	0.0742755	0
	896.564	H83 C48 N1 O12 P1	-0.58ppm	PCOx4 40:7	0	0	405014	0	174614	142114	0	59399.8	532106	0	234770	166467	0	0	397572	0	0	0	233600	0	394784	0	0	76007.3	0	0	419937	511682	0	0	0	PCOx4 40:7	0	0.904197	0	0.443231	0.332854	0	0.145691	1.41298	0	0.59713	0.419014	0	0
	930.643	H93 C50 N1 O12 P1	-0.40ppm	PCOx4 42:4	0	0	0	0	0	0	0	0	32043.6	0	0	0	0	0	0	0	0	0	0	0	21577.4	0	0	0	0	0	58320.7	78104.1	0	0	0	PCOx4 42:4	0	0	0	0	0	0	0	0.0850898	0	0	0	0	0
	928.627	H91 C50 N1 O12 P1	-0.67ppm	PCOx4 42:5	0	0	23885.8	0	0	0	0	0	74263.4	0	0	0	0	0	0	0	0	0	0	0	60302.4	0	0	0	0	0	26311.7	84521.2	0	0	0	PCOx4 42:5	0	0.0533252	0	0	0	0	0	0.197202	0	0	0	0	0
	926.611	H89 C50 N1 O12 P1	-0.42ppm	PCOx4 42:6	0	0	0	0	0	0	0	0	104178	0	0	0	0	0	35009.9	0	0	0	27881.7	0	20782.2	0	0	0	0	0	37944.8	75062.1	0	0	0	PCOx4 42:6	0	0	0	0	0	0	0	0.276639	0	0	0	0	0
	924.596	H87 C50 N1 O12 P1	-0.28ppm	PCOx4 42:7	0	0	0	0	0	0	0	0	17393.5	0	0	0	0	0	0	0	0	0	0	0	0	0	0	0	0	0	17733.3	34412.6	0	0	0	PCOx4 42:7	0	0	0	0	0	0	0	0.0461874	0	0	0	0	0
	822.549	H81 C42 N1 O12 P1	-0.63ppm	PCOx4 34:2	0	0	102906	0	0	0	0	0	400023	0	72011.5	0	0	0	120341	0	0	0	33614.2	0	178551	0	0	0	0	0	219727	617957	0	0	0	PCOx4 34:2	0	0.229737	0	0	0	0	0	1.06224	0	0.183159	0	0	0
																																					0	0	0	0	0	0	0	0	0	0	0	0	0
	###	PhosphatidylcholineOx5																																			0	0	0	0	0	0	0	0	0	0	0	0	0
	864.559	H83 C44 N1 O13 P1	-0.64ppm	PCOx5 36:3	0	0	185322	0	78237.9	27518.4	0	19908.1	243250	0	94005.1	-1.7	24871.9	9168.6	135765	0	0	23609.6	91707.3	0	184894	25907.5	0	23977.3	0	22008.2	118130	401914	0	0	0	PCOx5 36:3	0	0.413733	0	0.198595	0.0644526	0	0.048829	0.645934	0	0.239099	-4.27908e-06	0.0510303	0.018023
	862.543	H81 C44 N1 O13 P1	-1.42ppm	PCOx5 36:4	0	0	416574	0	252694	138703	14707.4	17363.4	693187	0	313534	138843	0	22377.9	445771	0	0	0	147357	13082.4	457260	0	0	22217.9	0	0	490744	880242	0	0	12384.2	PCOx5 36:4	0	0.930003	0	0.641425	0.324866	0.0339296	0.0425876	1.84072	0	0.797464	0.349481	0	0.0439889
	892.591	H87 C46 N1 O13 P1	-0.27ppm	PCOx5 38:3	0	0	92850.4	0	0	0	0	0	156910	0	0	30301	0	0	65732	0	0	19948.3	0	0	131844	0	0	0	0	0	148002	222458	0	0	0	PCOx5 38:3	0	0.207289	0	0	0	0	0	0.416663	0	0	0.0762708	0	0
	890.575	H85 C46 N1 O13 P1	-0.61ppm	PCOx5 38:4	0	0	638294	0	362453	294540	0	26722.8	960258	0	346632	318016	0	0	597192	0	0	81944.8	279986	0	639994	0	0	65165	0	0	784372	1.3852e+06	0	0	83700.9	PCOx5 38:4	0	1.42499	0	0.920032	0.689862	0	0.0655436	2.5499	0	0.881649	0.80048	0	0
	888.559	H83 C46 N1 O13 P1	-0.65ppm	PCOx5 38:5	0	0	911941	0	532231	401987	0	63244.9	1.28446e+06	0	515991	457093	0	0	771071	0	0	54023.3	449082	0	990304	0	0	42734.3	0	0	948444	1.56727e+06	0	0	87689.4	PCOx5 38:5	0	2.03591	0	1.35099	0.94152	0	0.155122	3.4108	0	1.31241	1.15055	0	0
	886.543	H81 C46 N1 O13 P1	-1.13ppm	PCOx5 38:6	0	0	462215	0	118886	102259	0	0	692995	0	164197	130783	0	0	405330	0	0	0	175550	0	410298	0	0	0	0	0	456146	797917	0	0	17925.9	PCOx5 38:6	0	1.0319	0	0.301775	0.239507	0	0	1.8402	0	0.417629	0.329195	0	0
	884.526	H79 C46 N1 O13 P1	-2.18ppm	PCOx5 38:7	0	26854.5	85362.5	0	14411.1	0	0	0	156600	0	0	0	0	0	103314	0	0	0	43879.7	0	84803.2	0	0	0	0	0	50594.1	184760	13592	0	0	PCOx5 38:7	0.0743081	0.190572	0	0.0365804	0	0	0	0.415842	0	0	0	0	0
	916.591	H87 C48 N1 O13 P1	-0.42ppm	PCOx5 40:5	0	0	356734	0	232772	115048	0	73031	632408	0	201551	243812	0	22355.7	408737	19115.3	0	63920.1	218396	0	409461	0	0	97731.6	0	50027.4	464128	688552	29040.3	81862.7	102791	PCOx5 40:5	0	0.796411	0	0.590857	0.26946	0	0.179125	1.67932	0	0.512639	0.613699	0	0.0439452
	914.575	H85 C48 N1 O13 P1	-0.47ppm	PCOx5 40:6	0	0	305916	0	222554	147109	0	32942.2	516646	16684.1	152985	168113	0	17968.1	367671	0	0	0	237440	0	420071	0	0	36023	0	31446.6	396053	690812	0	23674.8	30673.8	PCOx5 40:6	0	0.68296	0	0.564918	0.344553	0	0.0807981	1.37192	0.036572	0.389113	0.423159	0	0.0353204
	912.559	H83 C48 N1 O13 P1	-0.61ppm	PCOx5 40:7	0	0	341599	0	107048	0	0	0	419088	0	62206.4	92989.1	0	0	262658	0	0	0	79521.7	0	290306	0	0	0	0	0	262945	414183	0	0	0	PCOx5 40:7	0	0.762622	0	0.271724	0	0	0	1.11286	0	0.15822	0.234063	0	0
	910.543	H81 C48 N1 O13 P1	-1.48ppm	PCOx5 40:8	0	24777.8	0	0	0	0	0	0	60753.8	0	0	0	0	0	28200.9	0	0	0	0	0	37865.9	0	0	0	0	0	34978.5	65948.8	0	0	0	PCOx5 40:8	0.0685617	0	0	0	0	0	0	0.161328	0	0	0	0	0
	944.622	H91 C50 N1 O13 P1	0.02ppm	PCOx5 42:5	0	0	121743	0	0	0	0	0	101956	0	0	32838.4	0	0	58940.3	0	0	0	51108.8	0	84145.1	0	0	25044.8	0	28026.4	68246.3	115754	0	0	0	PCOx5 42:5	0	0.271792	0	0	0	0	0	0.270736	0	0	0.0826577	0	0
	942.606	H89 C50 N1 O13 P1	-0.09ppm	PCOx5 42:6	0	0	0	0	15471	0	0	0	46832.7	0	0	0	0	0	0	0	0	0	0	0	18390.8	0	0	0	0	0	41051.5	22735.9	0	0	0	PCOx5 42:6	0	0	0	0.0392708	0	0	0	0.124361	0	0	0	0	0
	940.591	H87 C50 N1 O13 P1	0.33ppm	PCOx5 42:7	0	0	0	0	0	0	0	0	38941.3	0	0	0	0	0	0	0	0	0	0	0	0	0	0	0	0	0	0	25191.4	0	0	0	PCOx5 42:7	0	0	0	0	0	0	0	0.103406	0	0	0	0	0
																																					0	0	0	0	0	0	0	0	0	0	0	0	0
																																					0	0	0	0	0	0	0	0	0	0	0	0	0
	###	PhosphatidylcholineOx6																																			0	0	0	0	0	0	0	0	0	0	0	0	0
	858.568	H85 C42 N1 O14 P1	-2.55ppm	PCOx6 34:0	0	0	39986.1	0	0	0	0	0	44693.7	0	0	33808.4	0	0	51022.6	0	0	0	0	0	12959.6	0	0	0	0	0	105211	115321	0	0	0	PCOx6 34:0	0	0.0892692	0	0	0	0	0	0.118681	0	0	0.0850993	0	0
	856.556	H83 C42 N1 O14 P1	1.75ppm	PCOx6 34:1	0	22220.5	-1.7	122604	-1.7	-1.7	39562.2	118561	-1.7	58722	61229.8	7546.2	64726.6	114703	-1.7	136464	0	0	0	0	-1.7	68033.8	0	0	0	0	-1.7	-1.7	0	0	0	PCOx6 34:1	0.0614855	-3.79526e-06	0.322796	-4.31519e-06	-3.98168e-06	0.0912691	0.290797	-4.51424e-06	0.12872	0.155736	0.0189946	0.132801	0.225474
	878.538	H81 C44 N1 O14 P1	-0.78ppm	PCOx6 36:4	0	44197	468686	0	191775	176892	0	36967.9	646073	0	285814	176331	36544.6	0	404454	0	0	0	212108	0	508400	0	0	0	37492.1	0	523228	975101	0	0	29927.5	PCOx6 36:4	0.122296	1.04634	0	0.486791	0.41431	0	0.090672	1.71561	0	0.726959	0.443844	0.0749795	0
	876.522	H79 C44 N1 O14 P1	-1.51ppm	PCOx6 36:5	0	0	34226.4	0	0	0	0	0	162834	0	0	0	0	0	0	0	0	0	0	0	92950	0	0	0	0	0	90232.3	181496	0	0	0	PCOx6 36:5	0	0.0764106	0	0	0	0	0	0.432394	0	0	0	0	0
	872.492	H75 C44 N1 O14 P1	0.07ppm	PCOx6 36:7	0	0	56419	0	80293.4	68350.4	0	0	309583	0	51208.7	70821.6	0	0	95886.2	0	0	0	15294.4	0	102248	0	0	0	0	0	35046.7	254409	0	0	0	PCOx6 36:7	0	0.125956	0	0.203812	0.160088	0	0	0.822078	0	0.130248	0.178265	0	0
	908.586	H87 C46 N1 O14 P1	-0.20ppm	PCOx6 38:3	0	0	0	0	0	0	0	0	0	0	0	0	0	0	0	0	0	0	0	0	31168.4	0	0	0	0	0	29951.4	71289.6	0	0	0	PCOx6 38:3	0	0	0	0	0	0	0	0	0	0	0	0	0
	906.57	H85 C46 N1 O14 P1	-0.32ppm	PCOx6 38:4	0	0	465916	0	300620	215490	0	0	787566	0	271551	162933	0	0	454543	0	0	75446.3	260405	0	580187	0	0	0	487662	0	606012	1.19258e+06	0	0	25124.7	PCOx6 38:4	0	1.04016	0	0.763077	0.504713	0	0	2.09133	0	0.690681	0.410119	0	0
	904.554	H83 C46 N1 O14 P1	-1.05ppm	PCOx6 38:5	0	0	653840	0	345060	262055	15622.8	26681.9	1.1687e+06	0	426988	306666	0	0	648905	13010	0	31273.5	313207	0	939303	0	0	23531.9	0	0	796967	1.5238e+06	0	0	0	PCOx6 38:5	0	1.4597	0	0.875881	0.613776	0.0360414	0.0654433	3.10341	0	1.08603	0.771911	0	0
	902.539	H81 C46 N1 O14 P1	-0.40ppm	PCOx6 38:6	0	0	429807	0	103205	106039	0	0	576368	0	93855.4	63558.3	0	0	335599	0	0	0	89065.7	0	398160	0	0	0	0	0	302434	794417	0	0	0	PCOx6 38:6	0	0.959546	0	0.261971	0.248361	0	0	1.53051	0	0.238718	0.159983	0	0
	900.524	H79 C46 N1 O14 P1	0.39ppm	PCOx6 38:7	0	0	43777.3	0	48192.6	0	0	16618	249097	0	19392.8	43783.2	0	0	20961.1	0	0	0	0	0	97565.3	0	0	0	0	0	32428	293479	0	0	0	PCOx6 38:7	0	0.0977331	0	0.12233	0	0	0.0407593	0.661462	0	0.049325	0.110207	0	0
	898.506	H77 C46 N1 O14 P1	-1.29ppm	PCOx6 38:8	0	0	43096.2	0	0	0	0	0	24028.9	0	21830.9	0	0	0	0	0	0	0	0	0	0	0	0	0	0	0	0	44271	0	0	0	PCOx6 38:8	0	0.0962125	0	0	0	0	0	0.0638072	0	0.0555262	0	0	0
	934.602	H89 C48 N1 O14 P1	0.12ppm	PCOx6 40:4	0	0	18151.9	0	31926.1	0	0	0	21422.3	0	83171	44937.2	28331.5	0	6487.1	0	0	0	0	0	94756.2	0	0	0	0	0	24552.1	146914	0	0	0	PCOx6 40:4	0	0.0405242	0	0.0810395	0	0	0	0.0568856	0	0.211543	0.113112	0.0581285	0
	932.585	H87 C48 N1 O14 P1	-0.51ppm	PCOx6 40:5	0	0	241841	0	151190	79254.9	0	0	452484	0	62464.7	47334.1	0	0	205273	0	0	0	97021.8	0	365715	0	0	0	0	0	400433	627574	0	0	0	PCOx6 40:5	0	0.539912	0	0.383774	0.185628	0	0	1.20154	0	0.158877	0.119145	0	0
	930.57	H85 C48 N1 O14 P1	-0.14ppm	PCOx6 40:6	0	0	393015	0	147948	76627.6	0	22538.9	604269	0	206194	128737	0	0	399319	0	0	0	152087	0	475229	0	0	0	0	0	459921	831716	0	0	16167	PCOx6 40:6	0	0.877409	0	0.375544	0.179474	0	0.0552817	1.6046	0	0.524448	0.324045	0	0
	928.554	H83 C48 N1 O14 P1	-0.60ppm	PCOx6 40:7	0	0	272414	0	64743.9	54455.7	0	0	325362	0	32377.1	29234.2	0	0	223388	0	0	0	97761.2	0	292908	0	0	0	0	0	212446	389280	0	0	0	PCOx6 40:7	0	0.608166	0	0.164342	0.127544	0	0	0.863978	0	0.0823501	0.0735855	0	0
	960.616	H91 C50 N1 O14 P1	-0.75ppm	PCOx6 42:5	0	0	22003.8	0	0	0	0	0	74895.9	0	0	0	0	0	18860.7	131995	0	0	0	0	19416	0	0	0	0	0	36997.1	89427.5	0	0	0	PCOx6 42:5	0	0.0491236	0	0	0	0	0	0.198881	0	0	0	0	0
	958.601	H89 C50 N1 O14 P1	-0.41ppm	PCOx6 42:6	0	0	0	0	0	0	0	0	11414.9	0	0	0	0	0	0	0	0	0	0	0	53321.9	0	0	0	0	0	0	41328.2	0	0	0	PCOx6 42:6	0	0	0	0	0	0	0	0.0303116	0	0	0	0	0
	956.585	H87 C50 N1 O14 P1	-0.68ppm	PCOx6 42:7	0	0	0	0	0	0	0	0	15145.1	0	0	0	0	0	0	0	0	0	0	0	20392.7	0	0	0	0	0	0	0	0	0	0	PCOx6 42:7	0	0	0	0	0	0	0	0.0402169	0	0	0	0	0
																																					0	0	0	0	0	0	0	0	0	0	0	0	0
																																					0	0	0	0	0	0	0	0	0	0	0	0	0
	###	PhosphatidylcholineOx7																																			0	0	0	0	0	0	0	0	0	0	0	0	0
	894.533	H81 C44 N1 O15 P1	-1.44ppm	PCOx7 36:4	0	0	0	0	0	0	0	0	14605.7	0	0	0	0	0	0	0	0	0	0	0	0	0	0	0	0	0	20880.9	29033.5	0	0	0	PCOx7 36:4	0	0	0	0	0	0	0	0.0387845	0	0	0	0	0
	892.517	H79 C44 N1 O15 P1	-1.00ppm	PCOx7 36:5	0	0	41012.7	0	35980.6	0	0	0	93152.3	0	16285.1	0	0	0	0	0	0	0	0	0	43194.6	0	0	0	0	0	60365.4	158419	0	0	0	PCOx7 36:5	0	0.0915611	0	0.0913312	0	0	0	0.24736	0	0.0414206	0	0	0
	920.548	H83 C46 N1 O15 P1	-1.06ppm	PCOx7 38:5	0	0	198087	0	0	0	0	0	311426	0	0	0	0	0	74047.8	0	0	0	0	0	232383	0	0	0	0	0	166013	424159	0	0	0	PCOx7 38:5	0	0.442231	0	0	0	0	0	0.826972	0	0	0	0	0
	918.533	H81 C46 N1 O15 P1	-0.42ppm	PCOx7 38:6	0	0	146000	0	0	0	0	0	298741	0	46341.1	18145.3	0	0	138450	0	0	0	20177.9	0	195324	0	0	0	0	0	158244	350520	0	0	0	PCOx7 38:6	0	0.325945	0	0	0	0	0	0.793288	0	0.117867	0.0456736	0	0
	916.518	H79 C46 N1 O15 P1	-0.02ppm	PCOx7 38:7	0	0	41608	0	0	0	0	0	46063.5	0	0	0	0	0	0	0	0	0	20942.8	0	0	0	0	0	0	0	0	127210	0	0	0	PCOx7 38:7	0	0.0928901	0	0	0	0	0	0.122319	0	0	0	0	0
	948.58	H87 C48 N1 O15 P1	-0.39ppm	PCOx7 40:5	0	0	43633.6	0	0	0	0	0	121042	0	0	0	0	0	23420.3	0	0	0	0	0	73980.7	0	0	0	0	0	9148.3	125905	0	0	0	PCOx7 40:5	0	0.0974123	0	0	0	0	0	0.321421	0	0	0	0	0
	946.565	H85 C48 N1 O15 P1	-0.32ppm	PCOx7 40:6	0	0	74250.3	0	31841.5	0	0	0	202797	0	71020.5	0	0	0	197454	0	0	0	40339.9	0	215449	0	0	0	0	0	230550	363431	0	0	0	PCOx7 40:6	0	0.165764	0	0.0808248	0	0	0	0.538514	0	0.180638	0	0	0
	944.549	H83 C48 N1 O15 P1	-0.62ppm	PCOx7 40:7	0	0	150533	0	0	0	0	0	144702	0	0	21774.1	0	0	95900.4	0	0	0	0	0	60745	0	0	0	0	0	45385.1	227422	0	0	0	PCOx7 40:7	0	0.336066	0	0	0	0	0	0.384248	0	0	0.0548077	0	0
[truncated: 17 more columns]

## Sheet: PE and PEOx
precursorexpmz$A	sumcomposition	precursorppmdev$A	name	intensity:Exp6_Sebastian_10_00.mzML	intensity:Exp6_Sebastian_10_01.mzML	intensity:Exp6_Sebastian_10_02.mzML	intensity:Exp6_Sebastian_10_03.mzML	intensity:Exp6_Sebastian_10_04.mzML	intensity:Exp6_Sebastian_10_05.mzML	intensity:Exp6_Sebastian_10_06.mzML	intensity:Exp6_Sebastian_10_07.mzML	intensity:Exp6_Sebastian_10_08.mzML	intensity:Exp6_Sebastian_10_09.mzML	intensity:Exp6_Sebastian_10_10.mzML	intensity:Exp6_Sebastian_10_11.mzML	intensity:Exp6_Sebastian_10_12.mzML	intensity:Exp6_Sebastian_10_13.mzML	intensity:Exp6_Sebastian_10_14.mzML	intensity:Exp6_Sebastian_10_15.mzML	intensity:Exp6_Sebastian_10_16.mzML	intensity:Exp6_Sebastian_10_17.mzML	intensity:Exp6_Sebastian_10_18.mzML	intensity:Exp6_Sebastian_10_19.mzML	intensity:Exp6_Sebastian_10_20.mzML	intensity:Exp6_Sebastian_10_21.mzML	intensity:Exp6_Sebastian_10_22.mzML	intensity:Exp6_Sebastian_10_23.mzML	intensity:Exp6_Sebastian_10_24.mzML	intensity:Exp6_Sebastian_10_25.mzML	intensity:Exp6_Sebastian_10_26.mzML	intensity:Exp6_Sebastian_10_27.mzML	intensity:Exp6_Sebastian_10_28.mzML	intensity:Exp6_Sebastian_10_29.mzML	intensity:Exp6_Sebastian_10_30.mzML	name	intensity:Exp6_Sebastian_10_01.mzML	intensity:Exp6_Sebastian_10_02.mzML	intensity:Exp6_Sebastian_10_03.mzML	intensity:Exp6_Sebastian_10_04.mzML	intensity:Exp6_Sebastian_10_05.mzML	intensity:Exp6_Sebastian_10_06.mzML	intensity:Exp6_Sebastian_10_07.mzML	intensity:Exp6_Sebastian_10_08.mzML	intensity:Exp6_Sebastian_10_09.mzML	intensity:Exp6_Sebastian_10_10.mzML	intensity:Exp6_Sebastian_10_11.mzML	intensity:Exp6_Sebastian_10_12.mzML	intensity:Exp6_Sebastian_10_13.mzML	intensity:Exp6_Sebastian_10_14.mzML
					Ctrl.	Fento 1 µM	Fento 2 µM	Erastin 10 µM	RSL3 100 nM	iFSP1 10 µM	Ctrl.	Fento 1 µM	Fento 2 µM	Erastin 10 µM	RSL3 100 nM	iFSP1 10 µM	Ctrl.	Fento 1 µM	Fento 2 µM	Erastin 10 µM	RSL3 100 nM	iFSP1 10 µM	Ctrl.	Fento 1 µM	Fento 2 µM	Erastin 10 µM	RSL3 100 nM	iFSP1 10 µM	Ctrl.	Fento 1 µM	Fento 2 µM	Erastin 10 µM	RSL3 100 nM	iFSP1 10 µM
###	Phosphatidylethanolamine			0	1	2	3	4	5	6	7	8	9	10	11	12	13	14	15	16	17	18	19	20	21	22	23	24	25	26	27	28	29	30		Normalization
720.554	H79 C39 N1 O8 P1	-0.05ppm	PE 34:0	1.93163e+06	7.52642e+06	8.71807e+06	5018103	8.15819e+06	1.04881e+07	9.61466e+06	9.66247e+06	9.54408e+06	1.01207e+07	9.20708e+06	9.06106e+06	1.19853e+07	7.6811e+06	6.67383e+06	8.68931e+06	1.05499e+07	1.10505e+07	1.00253e+07	1.10591e+07	9.89293e+06	9.52136e+06	1.18445e+07	1.12104e+07	6.91125e+06	9.41199e+06	11260167	9.35372e+06	1.16396e+07	1.31684e+07	1.12241e+07		1	2	3	4	5	6	7	8	9	10	11	12	13	14
692.523	H75 C37 N1 O8 P1	0.01ppm	PE 32:0	73818.2	1.33739e+06	1.51966e+06	925021	1.5356e+06	1.88429e+06	1692554	1.74923e+06	1.73636e+06	1.85954e+06	1.64887e+06	1.63859e+06	2.20771e+06	1.3234e+06	1285927	1.46762e+06	1.71795e+06	1.81802e+06	1.78748e+06	1.72537e+06	1.83174e+06	1.7164e+06	1.9435e+06	2.00319e+06	1.16992e+06	1.41575e+06	2.0078e+06	1.7431e+06	1.88118e+06	2.17683e+06	1.83914e+06	PE 32:0	8.88464	8.71556	9.21684	9.41143	8.98298	8.80195	9.05168	9.09652	9.18687	8.95433	9.04194	9.21007	8.61467	9.6341
688.491	H71 C37 N1 O8 P1	-0.03ppm	PE 32:2	0	0	0	0	21144.6	0	28461.3	14624.4	18474.9	0	0	22200.9	0	0	0	0	0	13420.6	0	24717.8	29089.6	33822.9	14236.9	0	0	0	26388.9	0	0	15434.8	0	PE 32:2	0	0	0	0.129591	0	0.14801	0.0756763	0.0967872	0	0	0.122507	0	0	0
744.554	H79 C41 N1 O8 P1	0.13ppm	PE 36:2	0	5.36978e+06	4.5842e+06	3807222	5.67125e+06	8.77273e+06	7.31972e+06	8.16117e+06	7.1463e+06	7.29546e+06	7.32998e+06	6.71625e+06	8.87822e+06	4.38902e+06	3.26109e+06	6.41218e+06	6.24153e+06	6.52828e+06	6.10019e+06	6.47917e+06	7.1143e+06	5.8498e+06	7409743	5.70276e+06	4.7204e+06	5.11755e+06	7.64949e+06	5.84019e+06	7.60337e+06	7.99419e+06	6.97626e+06	PE 36:2	35.6729	26.2914	37.9349	34.758	41.8223	38.0654	42.2313	37.4384	36.0424	39.8062	37.0611	37.0379	28.5703	24.4319
772.585	H83 C43 N1 O8 P1	-0.78ppm	PE 38:2	0	1.02902e+07	1.1859e+07	6.28509e+06	1.09816e+07	15384915	1.272e+07	14031203	1.25492e+07	1.38376e+07	12174870	1.25422e+07	1.65914e+07	1.03858e+07	9.65384e+06	1.25994e+07	1.49832e+07	1.44643e+07	1.4816e+07	1.48227e+07	1.44743e+07	1.41296e+07	1.6447e+07	1.49187e+07	9.72437e+06	1.19227e+07	1.58039e+07	1.36246e+07	15460185	1.60492e+07	1.55086e+07	PE 38:2	68.3606	68.014	62.6241	67.3038	73.3446	66.1488	72.6067	65.7434	68.3631	66.1169	69.2093	69.2154	67.6062	72.3261
800.616	H87 C45 N1 O8 P1	-0.81ppm	PE 40:2	0	3.72243e+06	3397369	1.79491e+06	3.28907e+06	5.25988e+06	4.01331e+06	4544944	4400978	4.84921e+06	4.07611e+06	3.96045e+06	5.47931e+06	3.66674e+06	2.73179e+06	4.15189e+06	4.99684e+06	5.71197e+06	4.86526e+06	5.09435e+06	4.85304e+06	5.12437e+06	6.18774e+06	5.22011e+06	3.71897e+06	4.66985e+06	5.24428e+06	4.87372e+06	5.60618e+06	5.6797e+06	5.60406e+06	PE 40:2	24.7291	19.4846	17.8843	20.1581	25.0754	20.8708	23.5185	23.0561	23.957	22.1357	21.8542	22.8584	23.8686	20.4664
716.523	H75 C39 N1 O8 P1	0.49ppm	PE 34:2	0	715459	431285	545350	664162	1.13859e+06	984557	1.09132e+06	1.00143e+06	945294	1.01971e+06	837457	1.36122e+06	466972	302043	711911	645958	754776	641030	670104	737222	592082	843809	598793	489020	648424	878808	639995	973318	998298	800189	PE 34:2	4.75298	2.47351	5.43383	4.07052	5.42802	5.12009	5.64719	5.24635	4.67012	5.53765	4.62119	5.67871	3.03975	2.26289
828.647	H91 C47 N1 O8 P1	-0.91ppm	PE 42:2	0	329840	322375	162273	273724	539262	381496	460042	379766	449301	374255	371011	730482	381850	192964	402368	476292	497538	453205	481068	483614	481610	541763	517597	344351	379291	537282	426846	552390	585418	534200	PE 42:2	2.19121	1.84889	1.61688	1.6776	2.57083	1.98393	2.38056	1.98954	2.21972	2.03243	2.04729	3.0474	2.48565	1.44568
770.569	H81 C43 N1 O8 P1	-0.80ppm	PE 38:3	0	1.95573e+06	1.91719e+06	1.32232e+06	2.08997e+06	2.97284e+06	2.48966e+06	2.80446e+06	2451793	2.4927e+06	2.43457e+06	2.32958e+06	3.09367e+06	1.72681e+06	1.27426e+06	2.14888e+06	2.40501e+06	2.7909e+06	2.42917e+06	2.51352e+06	2.27258e+06	2.13097e+06	2.92172e+06	2.50543e+06	2.06518e+06	2.09821e+06	2.45952e+06	2.00839e+06	2.75324e+06	3.1571e+06	2.69203e+06	PE 38:3	12.9925	10.9955	13.1755	12.809	14.1725	12.9472	14.5121	12.8446	12.3149	13.2212	12.8549	12.9061	11.2406	9.54672
768.553	H79 C43 N1 O8 P1	-1.05ppm	PE 38:4	0	3.79449e+06	2332321	3.20667e+06	3.42864e+06	6135447	5.47929e+06	6034779	5.78821e+06	5.59318e+06	5.34508e+06	4.3331e+06	7.04839e+06	2.55171e+06	880557	3.44542e+06	3.66852e+06	4.03227e+06	3.4442e+06	3854172	3.02391e+06	3.03435e+06	4.79811e+06	3.1855e+06	3.78741e+06	3.33781e+06	3.37695e+06	2.54332e+06	4.8301e+06	5.70516e+06	4.22018e+06	PE 38:4	25.2078	13.3764	31.951	21.0135	29.2496	28.4945	31.2279	30.3236	27.6325	29.027	23.9106	29.4043	16.6103	6.59709
766.538	H77 C43 N1 O8 P1	-0.74ppm	PE 38:5	0	1271315	658556	980107	883920	2.14731e+06	1.79719e+06	2.06323e+06	1.786e+06	2.03437e+06	1.92679e+06	1.27235e+06	7.02951e+06	754000	150786	1.12265e+06	954459	1.15318e+06	1.04304e+06	1.36829e+06	764588	863250	1.68475e+06	903470	1.52261e+06	897376	818819	581496	1.69422e+06	1.73899e+06	1.40812e+06	PE 38:5	8.44568	3.77696	9.76572	5.41738	10.2369	9.34609	10.6765	9.35659	10.0506	10.4636	7.02096	29.3255	4.90815	1.12968
764.522	H75 C43 N1 O8 P1	-1.06ppm	PE 38:6	0	404878	175179	330919	313998	755037	537818	675508	606612	580192	660676	399300	776775	249311	0	375245	296994	367144	328517	407264	239606	327476	488118	273709	321689	270427	312108	253044	487056	562393	467432	PE 38:6	2.68971	1.00469	3.29725	1.92444	3.59949	2.79687	3.49552	3.17795	2.86637	3.58787	2.20338	3.24053	1.62289	0
742.537	H77 C41 N1 O8 P1	-1.05ppm	PE 36:3	12509.8	504489	440731	440838	519178	941071	776284	771508	816768	779285	741758	694609	962904	444600	284401	569485	618530	678061	631926	665149	603637	520763	772674	674046	864683	552773	612461	509074	855404	861550	731102	PE 36:3	3.35145	2.52769	4.39248	3.18194	4.48637	4.03698	3.99229	4.27892	3.84997	4.02819	3.83294	4.01701	2.89411	2.13072
740.522	H75 C41 N1 O8 P1	-0.97ppm	PE 36:4	0	548605	259502	422717	476888	921583	708313	855261	816894	748674	814154	604363	984450	276758	84665.2	438542	444190	476854	441628	401809	432720	409412	569636	328130	597705	392287	440340	377162	609486	689792	557873	PE 36:4	3.64453	1.4883	4.21192	2.92275	4.39347	3.68351	4.42568	4.27958	3.69874	4.42135	3.33495	4.1069	1.80155	0.634308
798.6	H85 C45 N1 O8 P1	-0.98ppm	PE 40:3	124984	2.23073e+06	2.40252e+06	1.26228e+06	2.11958e+06	3.13793e+06	2.80397e+06	3.03136e+06	2882537	2.89845e+06	2.3029e+06	2.3786e+06	3.75053e+06	2.14455e+06	1.69425e+06	2.37751e+06	3.11129e+06	3.45135e+06	2.97594e+06	3.08e+06	2.22541e+06	2.63478e+06	3.56007e+06	3381611	2.20384e+06	2657425	2.66121e+06	2535820	3.29404e+06	3.59313e+06	3.33186e+06	PE 40:3	14.8193	13.779	12.5773	12.9905	14.9595	14.5817	15.6862	15.1012	14.3195	12.5061	13.1254	15.6464	13.9599	12.6932
796.585	H83 C45 N1 O8 P1	-0.34ppm	PE 40:4	3.02599e+06	2.6328e+06	2.70787e+06	2.30398e+06	2281020	4.21905e+06	3.94106e+06	4.07423e+06	3.90339e+06	4.18963e+06	3.20096e+06	3.11944e+06	4.78642e+06	2.2813e+06	1889052	2.11548e+06	3.54486e+06	3.80317e+06	2.88182e+06	3.70036e+06	2.05235e+06	2.35028e+06	4.28679e+06	3.55375e+06	2.66479e+06	2.97368e+06	2.07149e+06	2.02869e+06	3.87692e+06	4.44003e+06	3.53953e+06	PE 40:4	17.4904	15.5302	22.9567	13.9799	20.1135	20.4951	21.0827	20.4493	20.6984	17.3831	17.2134	19.9679	14.8501	14.1527
794.57	H81 C45 N1 O8 P1	1.06ppm	PE 40:5	22029.2	2.36555e+06	2.68582e+06	1.66745e+06	2.13041e+06	3.38864e+06	3.44989e+06	3.63987e+06	3.19634e+06	3.4825e+06	2.76218e+06	2317951	4488722	1.97146e+06	1.80121e+06	1.90564e+06	2.56912e+06	2.5543e+06	2.18666e+06	2.74939e+06	1.86972e+06	1.84378e+06	3.3379e+06	2.53929e+06	2.18366e+06	2.31649e+06	2.24187e+06	1.92323e+06	3.0972e+06	3.34949e+06	2.83587e+06	PE 40:5	15.7149	15.4038	16.6143	13.0569	16.1547	17.9408	18.8351	16.7452	17.2049	15.0003	12.7907	18.7259	12.8332	13.4946
792.553	H79 C45 N1 O8 P1	-1.46ppm	PE 40:6	35747.8	1.63361e+06	983275	1.33303e+06	1.32962e+06	2641747	2.5802e+06	2.91469e+06	2.37058e+06	2626156	2.46412e+06	1.85171e+06	3.61285e+06	1.32835e+06	248844	1.7021e+06	1.99536e+06	1.99971e+06	1.77073e+06	2.10335e+06	1.21758e+06	1374548	2.75222e+06	1.54189e+06	1.61486e+06	1.78215e+06	1.4355e+06	1.22411e+06	2.76593e+06	3.10066e+06	2.26848e+06	PE 40:6	10.8525	5.63929	13.2822	8.14898	12.594	13.418	15.0825	12.4191	12.9742	13.3817	10.218	15.072	8.64691	1.86433
790.537	H77 C45 N1 O8 P1	-1.34ppm	PE 40:7	73153.2	537930	239144	449112	427437	901897	848602	989877	897971	859508	726558	566382	1.17614e+06	473805	32868.7	394553	525036	533048	507436	691970	268747	269458	829435	433585	572394	589513	232207	200630	791336	774928	642500	PE 40:7	3.57361	1.37154	4.47492	2.61968	4.29962	4.41307	5.12228	4.70433	4.2463	3.94564	3.12536	4.90659	3.08423	0.246251
714.506	H73 C39 N1 O8 P1	-0.66ppm	PE 34:3	0	0	18727.9	0	15682.8	25569.2	20599.9	28143.9	18168.9	0	35583.3	41687.9	19928	0	0	29175.5	19125.6	0	21254.4	20220.2	0	22574.7	0	0	41681.9	0	27184.6	0	0	0	0	PE 34:3	0	0.107409	0	0.0961169	0.121896	0.107128	0.145635	0.0951841	0	0.193239	0.230039	0.083135	0	0
826.631	H89 C47 N1 O8 P1	-0.81ppm	PE 42:3	0	553195	614515	320432	487104	788315	632119	640651	760092	774741	619143	636500	810736	564342	387424	579530	771143	846311	734070	904713	640283	750324	910800	823140	562961	714659	716359	623001	919586	906961	854109	PE 42:3	3.67502	3.52438	3.19277	2.98537	3.75814	3.28727	3.31515	3.98201	3.82752	3.36232	3.51228	3.3822	3.67358	2.90257
824.616	H87 C47 N1 O8 P1	-0.36ppm	PE 42:4	0	1.43252e+06	1.31845e+06	767358	1.14875e+06	1960629	1724843	1.80863e+06	1.91933e+06	2.05533e+06	1.36773e+06	1.44554e+06	2367090	1.47128e+06	536770	1.12392e+06	1.91439e+06	2.10282e+06	1579761	2.08221e+06	1.03168e+06	1.31696e+06	2424109	1.96519e+06	1.29957e+06	1.7703e+06	1.04116e+06	1.23034e+06	2105462	2229454	2.05837e+06	PE 42:4	9.51659	7.56157	7.64589	7.04049	9.34692	8.96986	9.35905	10.0551	10.1541	7.42759	7.97669	9.87495	9.57726	4.02145
830.663	H93 C47 N1 O8 P1	-0.58ppm	PE 42:1	0	136485	104888	52639.5	111971	240441	209640	270941	212434	199814	148752	83976.3	271842	149750	43287.8	191343	172743	214838	189094	272986	241001	175008	294413	146964	160433	156516	224837	169010	295230	245104	251787	PE 42:1	0.906706	0.601557	0.524496	0.686249	1.14626	1.09021	1.40203	1.11291	0.987158	0.807812	0.463391	1.13406	0.974794	0.32431
802.631	H89 C45 N1 O8 P1	-0.70ppm	PE 40:1	0	1.36447e+06	1.17494e+06	688784	1.18181e+06	1.66401e+06	1.38676e+06	1.52567e+06	1.61911e+06	1794591	1.3019e+06	1257803	1.90542e+06	1.42049e+06	904448	1.48484e+06	1.75931e+06	2.20857e+06	1.67305e+06	2.11057e+06	1.80174e+06	1.82718e+06	2.33713e+06	2046483	1.50401e+06	1.80919e+06	1828864	1.74748e+06	2.2556e+06	2.32769e+06	2.15517e+06	PE 40:1	9.06455	6.73851	6.86299	7.24311	7.93282	7.21168	7.89481	8.48227	8.86597	7.0701	6.94071	7.94898	9.24663	6.77609
774.6	H85 C43 N1 O8 P1	-0.74ppm	PE 38:1	0	1.26595e+07	13070506	7.53324e+06	1.2441e+07	1.74378e+07	1.53404e+07	1.60244e+07	1.65928e+07	1.78887e+07	1.39949e+07	1.3377e+07	2.00257e+07	1.33609e+07	11243561	1.52671e+07	1.82966e+07	2.00147e+07	1.80759e+07	1.91709e+07	1.7959e+07	1.78788e+07	2.16302e+07	1.97877e+07	13420196	16556516	1.95981e+07	1.78937e+07	2.04003e+07	2.21687e+07	20508799	PE 38:1	84.1002	74.9621	75.0606	76.2487	83.1315	79.776	82.9207	86.9269	88.377	76.0007	73.8157	83.5426	86.9729	84.2362
746.569	H81 C41 N1 O8 P1	0.06ppm	PE 36:1	0	2.06636e+07	2.362e+07	1.41853e+07	2.3381e+07	3.15253e+07	2.71175e+07	2.857e+07	27713392	29447870	2.64214e+07	2.57894e+07	3.30889e+07	2.00774e+07	1.90182e+07	2.57914e+07	2.93351e+07	3.00979e+07	2.96027e+07	2.88932e+07	2.97512e+07	2.71629e+07	3.27847e+07	2.99562e+07	1.99749e+07	2.42412e+07	3.30679e+07	2.75918e+07	3.13898e+07	3.41829e+07	3.05356e+07	PE 36:1	137.273	135.466	141.341	143.298	150.291	141.022	147.84	145.186	145.484	143.484	142.309	138.039	130.693	142.484
718.538	H77 C39 N1 O8 P1	0.02ppm	PE 34:1	0	5070305	4.94595e+06	3.57765e+06	5.57889e+06	8.0934e+06	6.75678e+06	7.25818e+06	6.74754e+06	7.05533e+06	6.79453e+06	6.28507e+06	8.44746e+06	4.00902e+06	3.48555e+06	5.7745e+06	5.89917e+06	6.08411e+06	5.73657e+06	6.11095e+06	6.50557e+06	5.62004e+06	6.93959e+06	5.73723e+06	4.15554e+06	4.79778e+06	7.0971e+06	5.57052e+06	6.81486e+06	7.26684e+06	6.5403e+06	PE 34:1	33.6834	28.3661	35.6474	34.1919	38.5837	35.1379	37.5586	35.3494	34.8561	36.8984	34.6818	35.2408	26.0966	26.1136
690.506	H73 C37 N1 O8 P1	-0.50ppm	PE 32:1	0	284125	199607	261974	350883	535094	466240	539507	466004	435936	503404	354679	638855	187696	89828.3	283386	277397	288973	272065	318870	365009	236955	371951	247211	242617	220799	429383	283958	369810	333802	361274	PE 32:1	1.88752	1.14479	2.61029	2.15049	2.55096	2.42463	2.79176	2.44133	2.15369	2.73379	1.95716	2.66516	1.22181	0.672989
###	PhosphatidylethanolamineOx																																			0	0	0	0	0	0	0	0	0	0	0	0	0	0
704.486	H71 C37 N1 O9 P1	-0.14ppm	PEOx 32:2	0	0	0	0	0	0	0	0	0	0	0	0	0	0	0	16447.4	0	0	0	0	73191.3	49935.5	0	0	0	0	58944.3	0	0	0	0	PEOx 32:2	0	0	0	0	0	0	0	0	0	0	0	0	0	0
788.58	H83 C43 N1 O9 P1	0.45ppm	PEOx 38:2	0	0	0	0	0	0	0	0	0	0	0	0	0	0	166973	98990.5	0	0	0	0	213357	0	0	0	0	0	353746	231270	0	0	0	PEOx 38:2	0	0	0	0	0	0	0	0	0	0	0	0	0	1.25095
816.611	H87 C45 N1 O9 P1	-0.47ppm	PEOx 40:2	0	0	0	0	0	0	0	0	0	0	0	0	0	0	16642	19612.7	0	0	13054.8	0	20674.6	0	0	0	0	0	22380.9	10331.2	0	0	0	PEOx 40:2	0	0	0	0	0	0	0	0	0	0	0	0	0	0.124681
756.518	H75 C41 N1 O9 P1	0.94ppm	PEOx 36:4	0	0	0	0	26190.5	0	0	0	0	0	27477	17023.9	0	0	0	81381.7	0	0	26714.6	0	125922	69670	0	0	0	0	145625	41418.2	0	0	0	PEOx 36:4	0	0	0	0.160517	0	0	0	0	0	0.149217	0.0939399	0	0	0
754.502	H73 C41 N1 O9 P1	0.71ppm	PEOx 36:5	0	0	0	0	0	0	0	0	0	0	0	-1.6	0	0	0	0	0	0	0	0	53473.8	37553	0	0	0	0	33891.9	29903.2	0	0	0	PEOx 36:5	0	0	0	0	0	0	0	0	0	0	-8.82899e-06	0	0	0
730.502	H73 C39 N1 O9 P1	0.78ppm	PEOx 34:3	0	0	0	0	0	0	0	0	0	0	0	0	0	0	0	0	0	0	0	0	63763.4	0	0	0	0	0	46617	22131.4	0	0	0	PEOx 34:3	0	0	0	0	0	0	0	0	0	0	0	0	0	0
784.549	H79 C43 N1 O9 P1	-0.00ppm	PEOx 38:4	0	0	139014	341780	252581	190229	0	0	649030	51011.5	169367	135078	0	0	152376	263258	41242.7	172229	114244	0	276727	111672	56049	302016	0	0	262181	200939	0	309586	0	PEOx 38:4	0	0.797278	3.40547	1.54802	0.906882	0	0	3.40017	0.252017	0.919766	0.745377	0	0	1.1416
782.533	H77 C43 N1 O9 P1	0.42ppm	PEOx 38:5	0	1.43884e+06	2.13501e+06	1.02654e+06	1.4649e+06	1.66701e+06	1.54731e+06	1.64281e+06	1.60404e+06	1.81848e+06	1.37957e+06	1.63761e+06	1.69489e+06	1.35484e+06	1.04707e+06	1.12701e+06	1.77942e+06	1420624	1.55581e+06	1.57425e+06	1.13809e+06	1.26949e+06	1.78595e+06	1.73739e+06	1.14153e+06	1.55703e+06	1228743	1.23262e+06	1.75796e+06	1.72941e+06	1.55046e+06	PEOx 38:5	9.55857	12.2448	10.2284	8.97807	7.94715	8.04662	8.501	8.40332	8.98399	7.4919	9.03654	7.07067	8.81933	7.84463
780.518	H75 C43 N1 O9 P1	0.18ppm	PEOx 38:6	0	0	26141.5	0	90495.6	108478	25471.4	59045.4	27115.1	42358.6	80209.2	106082	0	67035.2	156863	181955	25059.6	65736.3	59926.4	43674.6	190897	177860	116014	102134	21309.1	75946	189430	186779	101855	86415.9	72556	PEOx 38:6	0	0.149927	0	0.55463	0.51715	0.132461	0.30554	0.142052	0.209268	0.435584	0.585375	0	0.436365	1.17521
778.501	H73 C43 N1 O9 P1	-0.31ppm	PEOx 38:7	0	0	0	17568.8	0	0	0	0	0	0	22523.3	0	0	21467.6	0	37651.2	0	0	0	24047.4	56286.8	0	0	0	0	0	30125	47270.4	0	0	0	PEOx 38:7	0	0	0.175054	0	0	0	0	0	0	0.122315	0	0	0.139743	0
702.47	H69 C37 N1 O9 P1	-0.47ppm	PEOx 32:3	0	0	0	0	18495.8	0	0	0	0	0	0	0	0	0	52412.4	0	0	0	0	0	166347	72272.3	0	0	0	0	181136	80174.8	0	0	0	PEOx 32:3	0	0	0	0.113357	0	0	0	0	0	0	0	0	0	0.392671
814.596	H85 C45 N1 O9 P1	0.00ppm	PEOx 40:3	0	0	0	16825.9	0	33190.7	20154.6	0	0	0	0	45304.5	0	0	89739.2	0	0	40132.3	60632.3	0	157919	94642	0	0	0	0	150752	79435	0	34019.5	0	PEOx 40:3	0	0	0.167652	0	0.15823	0.104812	0	0	0	0	0.249996	0	0	0.672322
812.58	H83 C45 N1 O9 P1	-0.54ppm	PEOx 40:4	0	125984	266672	485666	294101	284601	206829	234725	720776	196285	272920	271039	149576	138108	234506	267149	241403	405231	225643	247301	316539	312923	147028	537927	96105.7	194212	365596	273823	119294	628852	174233	PEOx 40:4	0.836947	1.52942	4.83914	1.80249	1.35678	1.07559	1.21462	3.77603	0.969724	1.48212	1.49562	0.623998	0.899012	1.75691
810.565	H81 C45 N1 O9 P1	0.29ppm	PEOx 40:5	0	1.04692e+06	1.77674e+06	1.02891e+06	1.10119e+06	1.37172e+06	1.3645e+06	1.40934e+06	1.51329e+06	1.38185e+06	1.01318e+06	1.26502e+06	1.21149e+06	1.06282e+06	846755	1.05592e+06	1.16753e+06	1.31379e+06	1.13639e+06	1.24601e+06	898163	1.00478e+06	1.3028e+06	1.55493e+06	615896	1.08099e+06	1.0804e+06	911872	1.52829e+06	1.80367e+06	1.24661e+06	PEOx 40:5	6.95496	10.19	10.252	6.74899	6.5394	7.09595	7.29288	7.92787	6.82688	5.50215	6.98054	5.05407	6.91844	6.34385
808.549	H79 C45 N1 O9 P1	-0.14ppm	PEOx 40:6	0	1.15458e+06	1.72367e+06	901872	1.18208e+06	1.32053e+06	1.44494e+06	1.37784e+06	1.40457e+06	1.50173e+06	1.03062e+06	1.33306e+06	1.31566e+06	1.28167e+06	874344	982764	1.57863e+06	1.40581e+06	1.25792e+06	1.45392e+06	840302	932124	1.5431e+06	1.63208e+06	817721	1.34448e+06	909050	1.05218e+06	1.55713e+06	1.65476e+06	1.38799e+06	PEOx 40:6	7.67018	9.88561	8.98619	7.24475	6.29535	7.51425	7.12985	7.35833	7.41914	5.59689	7.35598	5.48862	8.343	6.55054
806.533	H77 C45 N1 O9 P1	-0.48ppm	PEOx 40:7	0	608009	893605	393530	651269	627817	687661	739402	587585	809684	667934	776997	711829	714513	572656	616036	831194	757655	827387	765200	503400	604471	798904	803506	465198	679224	559644	593843	891998	944961	790723	PEOx 40:7	4.03916	5.12501	3.92111	3.9915	2.993	3.57611	3.82616	3.07827	4.00015	3.62728	4.28756	2.96959	4.65111	4.29031
836.58	H83 C47 N1 O9 P1	-0.61ppm	PEOx 42:6	0	424630	627204	346798	423647	460679	499624	388484	564735	496061	390873	388784	417371	397976	364821	404488	509991	616237	504893	494033	315129	360800	499308	681797	298500	429176	430948	388488	528804	669777	564051	PEOx 42:6	2.82093	3.59715	3.45547	2.59645	2.1962	2.59824	2.01027	2.95856	2.45073	2.12267	2.14536	1.74118	2.59062	2.73322
834.564	H81 C47 N1 O9 P1	-0.33ppm	PEOx 42:7	0	360286	601146	349118	333261	423531	455017	429374	460342	490534	396005	471547	450294	426221	330012	330896	625710	459832	536911	613579	210324	333579	588794	596272	427237	555432	236370	363717	594952	639579	564995	PEOx 42:7	2.39347	3.4477	3.47859	2.04249	2.0191	2.36627	2.22186	2.41166	2.42343	2.15054	2.60205	1.87852	2.77448	2.47244
																																				0	0	0	0	0	0	0	0	0	0	0	0	0	0
###	PhosphatidylethanolamineOx2																																			0	0	0	0	0	0	0	0	0	0	0	0	0	0
720.482	H71 C37 N1 O10 P1	0.82ppm	PEOx2 32:2	0	0	0	0	0	0	0	0	0	0	0	0	0	0	0	0	0	0	0	0	52697.6	0	0	0	0	0	50924.4	0	0	0	0	PEOx2 32:2	0	0	0	0	0	0	0	0	0	0	0	0	0	0
748.512	H75 C39 N1 O10 P1	-0.05ppm	PEOx2 34:2	0	136700	219724	94259.7	173326	169686	148457	192848	162378	203278	121500	159286	142510	79700.6	131268	101202	131251	118657	124386	142562	141488	112000	161265	148950	13009.9	103014	226155	121686	133784	215234	168572	PEOx2 34:2	0.908136	1.26017	0.939197	1.06228	0.808947	0.772034	0.99792	0.850674	1.00427	0.659819	0.878957	0.59452	0.51881	0.983451
776.544	H79 C41 N1 O10 P1	0.28ppm	PEOx2 36:2	0	680324	1.08212e+06	477400	1.00023e+06	931616	899592	830001	910874	836450	826130	916415	998961	698978	768988	883148	868087	744817	884272	757740	1115025	802129	862055	952822	452043	748155	1.33472e+06	938591	818462	959745	905344	PEOx2 36:2	4.51957	6.20618	4.75678	6.13024	4.4413	4.67823	4.29497	4.77193	4.13238	4.48638	5.05689	4.16744	4.54999	5.76123
804.575	H83 C43 N1 O10 P1	0.36ppm	PEOx2 38:2	0	609526	1.02211e+06	364700	1.10492e+06	944474	747991	887767	926080	704776	913306	940956	1.03489e+06	682135	1187402	1.02722e+06	916272	892374	998045	785364	1.61679e+06	1103088	988627	958560	639029	765670	1.94004e+06	1.2483e+06	900000	1.13222e+06	844150	PEOx2 38:2	4.04924	5.86203	3.63384	6.77185	4.5026	3.88985	4.59389	4.85159	3.48186	4.9598	5.19231	4.31732	4.44035	8.89596
832.606	H87 C45 N1 O10 P1	-0.27ppm	PEOx2 40:2	0	0	0	0	0	0	0	0	0	0	0	0	0	0	37228.4	41309.3	0	0	0	0	181765	61608.2	0	0	0	0	218351	72628.6	0	0	0	PEOx2 40:2	0	0	0	0	0	0	0	0	0	0	0	0	0	0.278913
714.434	H65 C37 N1 O10 P1	0.45ppm	PEOx2 32:5	0	0	0	0	0	0	0	0	0	0	0	0	0	0	16017.2	0	0	0	0	0	17783.8	0	0	0	0	0	26249.9	0	0	0	0	PEOx2 32:5	0	0	0	0	0	0	0	0	0	0	0	0	0	0.12
774.528	H77 C41 N1 O10 P1	-0.41ppm	PEOx2 36:3	0	121507	203953	30244	252858	280292	230889	167322	219200	183592	197658	317219	223772	101269	221585	177687	213833	124566	133004	101274	300196	184587	192827	206109	-1.6	160448	350602	213660	127033	205258	217004	PEOx2 36:3	0.807202	1.16971	0.301349	1.54972	1.33624	1.20072	0.865834	1.14836	0.907013	1.0734	1.75045	0.933524	0.659207	1.66011
716.449	H67 C37 N1 O10 P1	-0.34ppm	PEOx2 32:4	0	0	0	0	0	0	0	0	0	0	0	0	0	0	16422.5	0	0	20212.6	0	0	86110.6	26267.6	0	0	0	0	100801	43537.7	0	0	0	PEOx2 32:4	0	0	0	0	0	0	0	0	0	0	0	0	0	0.123037
798.527	H77 C43 N1 O10 P1	-1.37ppm	PEOx2 38:5	0	350483	600921	311889	468576	499462	395471	419267	329199	304750	480502	541858	343267	248169	455245	349647	298927	319689	478028	292819	452345	324957	272899	383996	822485	304603	423986	400062	362464	273716	248352	PEOx2 38:5	2.32835	3.44641	3.10764	2.87181	2.38109	2.05661	2.16956	1.72462	1.50558	2.60941	2.99004	1.43203	1.61545	3.41067
794.496	H73 C43 N1 O10 P1	-0.40ppm	PEOx2 38:7	0	0	0	0	0	0	0	0	0	0	0	0	0	0	11887	0	0	0	0	0	40274.3	0	0	0	0	0	27597.5	0	0	0	0	PEOx2 38:7	0	0	0	0	0	0	0	0	0	0	0	0	0	0.0890568
718.465	H69 C37 N1 O10 P1	-0.30ppm	PEOx2 32:3	0	0	0	0	0	0	0	0	0	0	20445.6	0	0	0	26574.7	48725.7	0	0	0	0	109929	31041.7	0	0	0	0	131786	29440.2	0	0	0	PEOx2 32:3	0	0	0	0	0	0	0	0	0	0.111032	0	0	0	0.199096
830.59	H85 C45 N1 O10 P1	-0.87ppm	PEOx2 40:3	0	4763	59259.9	9541.9	165102	111144	90300.4	165219	114160	125144	154202	145980	81081.9	46672.8	215538	215814	47923.1	95708.3	168413	2681.9	350965	226385	25438.9	95307.9	81979.7	19798.9	464230	281815	15688.1	0	87001.6	PEOx2 40:3	0.0316419	0.339868	0.0950748	1.01188	0.529859	0.469598	0.85495	0.598069	0.61826	0.837408	0.805538	0.338255	0.303816	1.6148
828.574	H83 C45 N1 O10 P1	-0.52ppm	PEOx2 40:4	0	192077	301427	135538	416004	422204	380396	349298	325530	418478	324327	520248	396904	241866	294878	463180	235960	236293	296854	160495	573937	324236	285992	293186	150764	206020	508766	300610	276030	239167	268212	PEOx2 40:4	1.27602	1.72875	1.35049	2.54961	2.01277	1.97821	1.8075	1.7054	2.06744	1.76129	2.87079	1.65579	1.57442	2.20921
826.559	H81 C45 N1 O10 P1	-0.84ppm	PEOx2 40:5	0	1.23185e+06	1.96935e+06	987206	1.41154e+06	1.5372e+06	1421187	1.51246e+06	1.52347e+06	1.40332e+06	1.271e+06	1.64998e+06	1.58965e+06	1.25711e+06	1.22483e+06	1.22367e+06	1.47328e+06	1.3439e+06	1.42678e+06	1.32305e+06	1.14862e+06	1.20524e+06	1.40443e+06	1.56216e+06	1.79593e+06	1.36694e+06	1.28456e+06	1.26653e+06	1.49906e+06	1.61481e+06	1.34881e+06	PEOx2 40:5	8.18347	11.2947	9.83645	8.65107	7.32832	7.39073	7.82647	7.9812	6.93296	6.90228	9.10478	6.63165	8.18316	9.17635
824.543	H79 C45 N1 O10 P1	-0.90ppm	PEOx2 40:6	0	591957	1.06609e+06	550052	738140	772666	681298	781749	657990	774421	733434	776224	780622	558977	721657	561039	677841	738961	893976	639202	619921	589351	705880	844857	1.40911e+06	673153	568139	629538	763556	782992	691955	PEOx2 40:6	3.93253	6.11424	5.48067	4.52392	3.68354	3.54302	4.04528	3.44711	3.82594	3.98299	4.2833	3.25657	3.63865	5.40662
822.527	H77 C45 N1 O10 P1	-1.27ppm	PEOx2 40:7	0	142860	234110	141397	187702	246908	183209	240916	187991	137038	170336	243166	159267	164004	155778	217586	181624	124500	289088	211633	280328	241091	209267	248390	397051	174622	217614	154889	237554	170997	231364	PEOx2 40:7	0.949059	1.34267	1.40887	1.15039	1.17709	0.952761	1.24666	0.984854	0.677019	0.925025	1.34182	0.664425	1.06758	1.16708
854.59	H85 C47 N1 O10 P1	-0.38ppm	PEOx2 42:5	0	183395	463591	107785	300673	318016	313521	391880	347866	434144	234446	302748	0	216738	188811	435071	112805	138700	303648	257960	269019	268119	380262	262960	101222	83467.3	250860	219935	355680	206356	177184	PEOx2 42:5	1.21834	2.65879	1.07396	1.84277	1.51608	1.63043	2.02785	1.82242	2.14484	1.27318	1.6706	0	1.41085	1.41457
852.575	H83 C47 N1 O10 P1	-0.40ppm	PEOx2 42:6	0	756558	1.16074e+06	558484	712257	881251	1.18307e+06	1.11682e+06	1.07697e+06	1.32508e+06	596310	982553	1.49448e+06	1.0623e+06	528114	706293	823741	664077	754088	700262	525456	506510	1.07151e+06	839202	662090	675489	463740	608502	1.04117e+06	865451	729573	PEOx2 42:6	5.02601	6.6571	5.56469	4.36528	4.20119	6.15241	5.77918	5.6421	6.54639	3.23832	5.42185	6.23464	6.91502	3.9566
850.559	H81 C47 N1 O10 P1	-0.73ppm	PEOx2 42:7	0	578875	813657	391881	558195	685321	746719	746901	681358	782909	478529	683560	859309	724523	427277	513256	796566	696901	609428	627644	406058	492950	829684	729011	533993	688349	469737	449785	805763	828870	685232	PEOx2 42:7	3.84562	4.6665	3.90467	3.42107	3.26713	3.88323	3.86496	3.56953	3.86787	2.5987	3.77197	3.58484	4.71627	3.20114
806.589	H85 C43 N1 O10 P1	-1.53ppm	PEOx2 38:1	41176.8	0	0	0	234341	0	0	0	0	61095.5	101876	102433	140186	0	190479	103564	0	0	0	0	425120	202440	0	0	0	0	485988	210931	0	0	0	PEOx2 38:1	0	0	0	1.43623	0	0	0	0	0.301835	0.553246	0.565238	0.584821	0	1.42706
750.529	H77 C39 N1 O10 P1	1.58ppm	PEOx2 34:1	0	58778.6	138452	0	35292	43750.1	43890.5	47126.4	37208.8	54116	26697.4	49351.3	0	0	70272.8	0	22884	23465.9	48898.4	35810.4	117909	31397.3	18232.9	45519.8	21084.8	21189.2	143838	34997	25707.9	52504	0	PEOx2 34:1	0.390482	0.794054	0	0.216298	0.20857	0.228248	0.243863	0.194931	0.267354	0.144983	0.272326	0	0	0.526481
808.604	H87 C43 N1 O10 P1	-3.31ppm	PEOx2 38:0	16933.4	0	0	0	0	0	0	0	0	0	0	0	0	0	321903	179303	0	0	0	0	417811	128649	0	0	0	0	489624	422682	0	137544	122261	PEOx2 38:0	0	0	0	0	0	0	0	0	0	0	0	0	0	2.41168
780.575	H83 C41 N1 O10 P1	0.00ppm	PEOx2 36:0	0	595980	1.17294e+06	252109	2.02765e+06	1.61648e+06	1.01155e+06	1.55558e+06	1.43719e+06	1.71078e+06	1.8926e+06	2.04572e+06	1.9225e+06	1.04924e+06	1.72048e+06	1.87933e+06	1.57555e+06	2.04338e+06	1.66684e+06	1.31299e+06	3.02642e+06	2.50345e+06	1.85853e+06	2.36213e+06	1.5479e+06	1.52181e+06	4.19255e+06	2.77297e+06	1807255	2433438	2.08839e+06	PEOx2 36:0	3.95925	6.72707	2.512	12.4271	7.70624	5.26048	8.04962	7.5292	8.45189	10.278	11.2885	8.02021	6.83	12.8898
###	PhosphatidylethanolamineOx3																																			0	0	0	0	0	0	0	0	0	0	0	0	0	0
760.476	H71 C39 N1 O11 P1	-0.62ppm	PEOx3 34:4	0	0	0	0	0	0	0	24448.2	0	0	0	19020.3	0	0	26881.5	19059.3	0	0	20448.5	0	164004	60553.2	11520.8	0	0	0	151810	77738.5	0	0	0	PEOx3 34:4	0	0	0	0	0	0	0.126511	0	0	0	0.104956	0	0	0.201395
758.46	H69 C39 N1 O11 P1	0.13ppm	PEOx3 34:5	0	0	0	0	0	0	0	0	0	0	0	0	28361.9	0	0	0	0	0	0	0	72662.9	0	0	0	0	0	135137	42687.1	0	0	0	PEOx3 34:5	0	0	0	0	0	0	0	0	0	0	0	0.118319	0	0
790.522	H77 C41 N1 O11 P1	-0.55ppm	PEOx3 36:3	0	0	0	0	0	0	0	0	0	0	0	0	0	0	0	0	0	0	0	0	0	0	0	0	0	0	60438.8	0	0	0	0	PEOx3 36:3	0	0	0	0	0	0	0	0	0	0	0	0	0	0
788.506	H75 C41 N1 O11 P1	-0.99ppm	PEOx3 36:4	0	0	0	0	35748.8	0	0	0	0	0	0	29132	0	0	0	92458.2	0	0	0	0	194464	47778.9	0	0	0	0	201081	56140.8	0	0	0	PEOx3 36:4	0	0	0	0.219098	0	0	0	0	0	0	0.160754	0	0	0
786.492	H73 C41 N1 O11 P1	0.21ppm	PEOx3 36:5	0	0	0	0	0	0	0	0	0	0	0	0	0	0	0	0	0	0	0	0	74397.4	0	0	0	0	0	70459.7	39354	0	0	0	PEOx3 36:5	0	0	0	0	0	0	0	0	0	0	0	0	0	0
816.538	H79 C43 N1 O11 P1	-0.58ppm	PEOx3 38:4	0	0	0	0	91404	48584.7	0	0	0	0	70934.6	39577	0	0	131929	178705	0	0	0	0	283339	102110	0	0	0	0	325778	123014	0	0	0	PEOx3 38:4	0	0	0	0.560198	0.231618	0	0	0	0	0.385217	0.218391	0	0	0.988405
814.522	H77 C43 N1 O11 P1	-0.62ppm	PEOx3 38:5	0	0	0	0	101138	18669	0	26702.3	0	0	77890	63731.4	0	0	51663	306183	0	0	25864.6	0	343502	186674	0	0	0	0	367984	190442	0	0	0	PEOx3 38:5	0	0	0	0.619854	0.0890008	0	0.138175	0	0	0.422989	0.351678	0	0	0.387057
812.506	H75 C43 N1 O11 P1	-0.89ppm	PEOx3 38:6	0	0	0	0	0	0	0	0	0	0	45168.4	0	0	0	57572	93334.1	0	0	0	0	179022	53917.3	0	0	0	0	138681	84627.5	0	0	0	PEOx3 38:6	0	0	0	0	0	0	0	0	0	0.245292	0	0	0	0.431327
810.49	H73 C43 N1 O11 P1	-1.64ppm	PEOx3 38:7	0	0	0	0	0	0	0	0	0	0	0	0	0	0	0	0	0	0	0	0	46769.9	18866.1	0	0	0	0	36504.9	28442.5	0	0	0	PEOx3 38:7	0	0	0	0	0	0	0	0	0	0	0	0	0	0
846.585	H85 C45 N1 O11 P1	-0.37ppm	PEOx3 40:3	0	0	0	0	0	0	0	0	0	0	0	0	0	0	0	8944.4	0	0	0	0	91627.5	0	0	0	0	0	93839.2	0	0	0	0	PEOx3 40:3	0	0	0	0	0	0	0	0	0	0	0	0	0	0
844.57	H83 C45 N1 O11 P1	-0.03ppm	PEOx3 40:4	0	0	0	0	0	0	0	0	0	0	22940.8	0	0	0	81919.1	99381.8	0	0	0	0	170181	55276.8	0	0	0	0	226243	66301.4	0	0	0	PEOx3 40:4	0	0	0	0	0	0	0	0	0	0.124582	0	0	0	0.613734
842.554	H81 C45 N1 O11 P1	-0.31ppm	PEOx3 40:5	0	0	0	0	61545.5	46873.2	0	0	0	0	56085	48555.3	0	0	120508	213292	0	0	31793.3	0	289290	75157.2	0	0	0	0	300940	92358.2	0	0	0	PEOx3 40:5	0	0	0	0.377201	0.223459	0	0	0	0	0.304575	0.267934	0	0	0.902837
840.538	H79 C45 N1 O11 P1	-0.97ppm	PEOx3 40:6	0	0	0	0	74268.9	54748.8	0	0	0	0	21188.4	55719.9	0	0	109526	128942	0	0	22591.5	0	292238	66670.4	0	0	0	0	236863	138431	0	0	0	PEOx3 40:6	0	0	0	0.45518	0.261004	0	0	0	0	0.115066	0.307469	0	0	0.820564
870.585	H85 C47 N1 O11 P1	-0.70ppm	PEOx3 42:5	0	0	0	0	0	0	0	0	0	0	44731.3	0	0	0	0	23040.9	0	0	0	0	64334.8	0	0	0	0	0	86177.7	11251.1	0	0	0	PEOx3 42:5	0	0	0	0	0	0	0	0	0	0.242918	0	0	0	0
868.569	H83 C47 N1 O11 P1	-1.11ppm	PEOx3 42:6	0	0	0	0	0	0	0	0	0	0	0	0	0	0	58871.9	44121.7	0	0	0	0	52428.9	23942.8	0	0	0	0	80146.4	81257.2	0	26967.1	0	PEOx3 42:6	0	0	0	0	0	0	0	0	0	0	0	0	0	0.441066
																																				0	0	0	0	0	0	0	0	0	0	0	0	0	0
																																				0	0	0	0	0	0	0	0	0	0	0	0	0	0
###	PhosphatidylethanolamineOx4																																			0	0	0	0	0	0	0	0	0	0	0	0	0	0
866.611	H89 C45 N1 O12 P1	-0.58ppm	PEOx4 40:1	0	43851.9	133390	28111.7	212010	143314	77829.4	138383	193593	131335	115418	150226	151658	93589.3	167782	99132.8	215921	309774	249421	270808	265007	184024	305364	327338	122322	219312	290833	262993	257714	364507	330562	PEOx4 40:1	0.29132	0.765023	0.280103	1.29937	0.683222	0.404744	0.716084	1.01421	0.648845	0.62679	0.828968	0.632682	0.609218	1.25702
836.563	H83 C43 N1 O12 P1	-1.61ppm	PEOx4 38:2	0	0	0	0	0	0	10412.8	0	0	0	23167.8	0	0	0	31401.9	28993.5	0	0	0	0	94709.2	37365.8	0	0	8119.8	0	134473	65251.6	0	0	0	PEOx4 38:2	0	0	0	0	0	0.0541507	0	0	0	0.125815	0	0	0	0.235262
864.596	H87 C45 N1 O12 P1	-0.27ppm	PEOx4 40:2	0	0	34959.8	0	102604	20323.4	34285.6	55033.6	39005.5	48456.1	91776.6	53154.5	45365.9	0	23717.9	32098	41042.3	38739	36446.1	0	121535	68424.1	46428.7	44080.2	70620.6	27071	62171.6	42525.7	27429.2	46534.5	26257.4	PEOx4 40:2	0	0.200502	0	0.628838	0.0968879	0.178299	0.28478	0.204344	0.239392	0.498402	0.293313	0.189256	0	0.177693
802.487	H73 C41 N1 O12 P1	0.83ppm	PEOx4 36:5	0	0	0	0	0	0	0	0	0	0	0	0	0	0	0	21948.3	0	0	0	0	21899.4	0	0	0	0	0	0	0	0	0	0	PEOx4 36:5	0	0	0	0	0	0	0	0	0	0	0	0	0	0
832.536	H79 C43 N1 O12 P1	2.96ppm	PEOx4 38:4	0	107186	0	0	36447.3	58939.3	52683.8	25036.8	51099.7	10205.8	41255.6	0	67835	29191.2	13587	147029	0	42373.1	0	78046	299166	93351.9	20125.6	0	0	0	331445	125286	51776.5	19766.4	17051.7	PEOx4 38:4	0.712063	0	0	0.223378	0.280982	0.273977	0.129557	0.267704	0.0504206	0.224043	0	0.282992	0.19002	0.101793
828.502	H75 C43 N1 O12 P1	0.34ppm	PEOx4 38:6	0	0	0	0	13205.2	0	0	23945.7	0	0	0	0	0	0	22686.1	54754.6	0	0	0	0	158256	52055.2	0	0	0	0	147196	97114	0	17198.3	0	PEOx4 38:6	0	0	0	0.0809321	0	0	0.123911	0	0	0	0	0	0	0.169963
804.504	H75 C41 N1 O12 P1	1.69ppm	PEOx4 36:4	0	36783	0	0	15671	0	0	0	0	0	11880	43159.1	28699.1	0	0	0	0	0	0	0	62901.9	29597.4	0	0	0	0	21812	50886.8	0	0	0	PEOx4 36:4	0.244359	0	0	0.0960445	0	0	0	0	0	0.0645155	0.238157	0.119726	0	0
774.455	H69 C39 N1 O12 P1	-0.47ppm	PEOx4 34:5	0	0	0	0	0	0	0	0	0	0	21812.4	0	0	0	0	0	0	0	0	0	45421.4	0	0	0	0	0	40102.5	0	0	0	0	PEOx4 34:5	0	0	0	0	0	0	0	0	0	0.118454	0	0	0	0
856.535	H79 C45 N1 O12 P1	2.21ppm	PEOx4 40:6	0	136929	16517.9	20244.9	65770.5	37295.7	70752.4	53581.5	55703	38399.7	85548.3	61977.2	164520	0	110965	141051	0	60950.8	50774.9	41661.9	212901	112840	16685.1	22588.3	15338.4	0	329795	165377	0	0	0	PEOx4 40:6	0.909658	0.0947337	0.201719	0.403095	0.1778	0.36794	0.277266	0.29182	0.189709	0.464579	0.341998	0.68634	0	0.831344
854.518	H77 C45 N1 O12 P1	-0.38ppm	PEOx4 40:7	0	0	0	0	0	0	0	0	0	0	0	0	0	0	36225.7	69458.2	0	0	0	0	103958	41762.6	0	0	19478.4	0	95526.3	59799.9	0	0	0	PEOx4 40:7	0	0	0	0	0	0	0	0	0	0	0	0	0	0.271401
888.596	H87 C47 N1 O12 P1	-0.36ppm	PEOx4 42:4	0	0	0	0	0	0	0	0	0	0	25530.8	0	0	0	35329.3	43546.2	0	0	25340.8	0	88503.9	83211.9	0	0	0	0	160165	56610.5	0	0	0	PEOx4 42:4	0	0	0	0	0	0	0	0	0	0.138648	0	0	0	0.264685
886.58	H85 C47 N1 O12 P1	-0.02ppm	PEOx4 42:5	12987.9	0	0	0	49463.1	0	3967.5	21394.4	0	0	0	52594	0	0	77122.5	15882.5	0	0	0	0	57364.3	57228	0	0	0	0	61416.3	-1.8	0	0	0	PEOx4 42:5	0	0	0	0.30315	0	0.0206326	0.110709	0	0	0	0.29022	0	0	0.577798
																																				0	0	0	0	0	0	0	0	0	0	0	0	0	0
###	PhosphatidylethanolamineOx5																																			0	0	0	0	0	0	0	0	0	0	0	0	0	0
828.558	H83 C41 N1 O13 P1	-1.90ppm	PEOx5 36:0	0	0	0	0	0	0	0	0	0	0	0	0	0	0	16825.9	18951.1	0	0	0	0	0	0	0	0	0	0	24231.3	0	0	0	0	PEOx5 36:0	0	0	0	0	0	0	0	0	0	0	0	0	0	0.126059
848.528	H79 C43 N1 O13 P1	-0.08ppm	PEOx5 38:4	0	0	0	0	27162.2	0	0	0	0	0	0	0	0	0	0	73274.3	0	0	0	0	104398	11919.9	0	0	0	0	152376	63969.1	0	0	12832.3	PEOx5 38:4	0	0	0	0.166472	0	0	0	0	0	0	0	0	0	0
846.512	H77 C43 N1 O13 P1	-0.37ppm	PEOx5 38:5	0	0	0	0	0	0	0	0	0	0	0	0	0	0	17585.5	64753.5	0	0	0	0	170114	40999.6	0	0	0	0	289014	58644.3	0	0	0	PEOx5 38:5	0	0	0	0	0	0	0	0	0	0	0	0	0	0.13175
844.496	H75 C43 N1 O13 P1	-1.13ppm	PEOx5 38:6	0	0	0	0	0	0	0	0	0	0	0	0	0	0	20389	23861.7	0	0	0	0	66975.4	0	0	0	0	0	65877.3	0	0	0	0	PEOx5 38:6	0	0	0	0	0	0	0	0	0	0	0	0	0	0.152753
876.56	H83 C45 N1 O13 P1	0.80ppm	PEOx5 40:4	0	25356.7	26657	18708.9	26367.6	0	0	0	0	0	0	0	0	0	26702.9	40062.1	0	0	0	0	67013.4	21225.5	0	0	0	0	84326.8	0	0	0	0	PEOx5 40:4	0.168451	0.152884	0.186414	0.161602	0	0	0	0	0	0	0	0	0	0.200057
874.545	H81 C45 N1 O13 P1	1.12ppm	PEOx5 40:5	0	0	0	0	106149	0	0	22464.3	0	0	44594.3	113186	77490.8	0	63403.5	146864	0	0	0	0	111323	58742.4	0	0	51234.5	0	203246	52360.6	0	0	0	PEOx5 40:5	0	0	0	0.650566	0	0	0.116245	0	0	0.242174	0.624576	0.323274	0	0.475016
872.528	H79 C45 N1 O13 P1	-0.09ppm	PEOx5 40:6	0	0	0	0	0	0	0	0	0	0	27637.7	27702.2	0	0	74848.6	69672.7	0	23646.8	0	0	158957	73965.7	0	0	0	0	190421	46835.1	0	0	0	PEOx5 40:6	0	0	0	0	0	0	0	0	0	0.150089	0.152864	0	0	0.560762
870.511	H77 C45 N1 O13 P1	-1.34ppm	PEOx5 40:7	0	0	0	0	0	0	0	0	0	0	0	0	0	0	0	58441.6	0	0	0	0	65377.7	16228.7	0	0	0	0	90476.8	21777.2	0	0	0	PEOx5 40:7	0	0	0	0	0	0	0	0	0	0	0	0	0	0
868.495	H75 C45 N1 O13 P1	-2.34ppm	PEOx5 40:8	0	0	0	0	0	0	0	0	0	0	0	0	0	0	0	0	0	0	0	0	21394.4	0	0	0	0	0	29920.1	0	0	0	0	PEOx5 40:8	0	0	0	0	0	0	0	0	0	0	0	0	0	0
906.606	H89 C47 N1 O13 P1	-0.70ppm	PEOx5 42:3	0	0	0	0	0	0	0	0	0	0	0	0	0	0	20120.7	0	0	0	0	0	22587.8	0	0	0	0	0	0	0	0	0	0	PEOx5 42:3	0	0	0	0	0	0	0	0	0	0	0	0	0	0.150743
904.59	H87 C47 N1 O13 P1	-0.61ppm	PEOx5 42:4	0	0	199686	258002	53838	47233.1	218176	68982.7	50198.4	0	99285.2	40591.5	0	0	390592	196210	0	97365.4	149617	23716.6	135240	118619	28748.4	106346	0	37925.3	273088	75915.9	70621	613766	142275	PEOx5 42:4	0	1.14524	2.57072	0.329963	0.225175	1.1346	0.356962	0.262982	0	0.539178	0.223989	0	0	2.92629
902.576	H85 C47 N1 O13 P1	0.38ppm	PEOx5 42:5	0	0	0	0	0	0	0	0	0	0	0	0	0	0	18238.2	0	0	0	0	0	27164.8	0	0	0	0	0	0	14377.9	0	0	0	PEOx5 42:5	0	0	0	0	0	0	0	0	0	0	0	0	0	0.13664
898.544	H81 C47 N1 O13 P1	-0.37ppm	PEOx5 42:7	0	0	0	0	0	0	0	0	0	0	0	0	0	0	0	24292.6	0	0	0	0	0	0	0	0	0	0	15461.5	0	0	0	0	PEOx5 42:7	0	0	0	0	0	0	0	0	0	0	0	0	0	0
																																				0	0	0	0	0	0	0	0	0	0	0	0	0	0
																																				0	0	0	0	0	0	0	0	0	0	0	0	0	0
###	PhosphatidylethanolamineOx6																																			0	0	0	0	0	0	0	0	0	0	0	0	0	0
788.494	H75 C37 N1 O14 P1	2.18ppm	PEOx6 32:0	0	0	61728.7	50039.1	14515.1	0	0	0	22129.4	0	0	0	0	0	18127.9	0	0	0	0	0	0	0	0	0	0	0	0	0	0	0	0	PEOx6 32:0	0	0.354027	0.498586	0.0889603	0	0	0	0.115933	0	0	0	0	0	0.135813
812.493	H75 C39 N1 O14 P1	1.61ppm	PEOx6 34:2	0	206634	0	219808	489973	1.09369e+06	0	287529	181118	0	672575	423850	0	0	654567	600363	0	197250	384775	0	726190	633558	0	148511	142068	0	864362	697747	0	0	154102	PEOx6 34:2	1.37272	0	2.19015	3.00295	5.21393	0	1.48786	0.948848	0	3.65248	2.33886	0	0	4.90398
862.508	H77 C43 N1 O14 P1	0.11ppm	PEOx6 38:5	0	0	0	0	0	0	0	0	0	0	0	0	0	0	0	0	0	0	0	0	54358.6	18262.1	0	0	0	0	80725.4	30568.3	0	0	0	PEOx6 38:5	0	0	0	0	0	0	0	0	0	0	0	0	0	0
860.491	H75 C43 N1 O14 P1	-0.56ppm	PEOx6 38:6	0	0	0	0	0	0	0	0	0	0	0	0	0	0	0	0	0	0	0	0	46941.1	0	0	0	0	0	54163.9	0	0	0	0	PEOx6 38:6	0	0	0	0	0	0	0	0	0	0	0	0	0	0
890.539	H81 C45 N1 O14 P1	0.28ppm	PEOx6 40:5	0	0	0	0	0	0	0	0	0	0	0	0	0	0	20265.6	18697.4	0	0	0	0	123164	36321.1	0	0	0	0	76705.2	62507.7	0	0	0	PEOx6 40:5	0	0	0	0	0	0	0	0	0	0	0	0	0	0.151829
888.524	H79 C45 N1 O14 P1	1.18ppm	PEOx6 40:6	0	0	0	0	0	0	0	0	0	0	0	0	0	0	0	0	0	0	0	0	0	20794.3	0	0	24074.9	0	28516.8	0	0	0	0	PEOx6 40:6	0	0	0	0	0	0	0	0	0	0	0	0	0	0
886.508	H77 C45 N1 O14 P1	0.03ppm	PEOx6 40:7	0	0	0	0	413485	512609	0	87153.7	48548.2	0	252811	423386	0	0	374429	432672	0	47011.2	249152	0	916841	417994	0	35452.6	0	0	819121	348216	0	0	18015.4	PEOx6 40:7	0	0	0	2.53417	2.44376	0	0.450991	0.254337	0	1.37291	2.3363	0	0	2.80521
918.571	H85 C47 N1 O14 P1	1.22ppm	PEOx6 42:5	0	0	0	171586	0	0	0	0	37573.2	0	0	0	0	0	25583.8	0	0	0	0	0	16053.3	25047.8	0	0	0	0	65909.9	25232.1	0	0	0	PEOx6 42:5	0	0	1.70967	0	0	0	0	0.19684	0	0	0	0	0	0.191673
910.507	H77 C47 N1 O14 P1	-0.73ppm	PEOx6 42:9	0	0	0	0	0	0	0	0	0	0	0	0	0	0	0	0	0	0	0	0	27896.6	0	0	0	0	0	0	31212.9	0	0	0	PEOx6 42:9	0	0	0	0	0	0	0	0	0	0	0	0	0	0
																																				0	0	0	0	0	0	0	0	0	0	0	0	0	0
																																				0	0	0	0	0	0	0	0	0	0	0	0	0	0
[truncated: 16 more columns]

## Sheet: PS and PSOx
precursorexpmz$A	sumcomposition	precursorppmdev$A	name	intensity:Exp6_Sebastian_2_00.mzML	intensity:Exp6_Sebastian_2_01.mzML	intensity:Exp6_Sebastian_2_02.mzML	intensity:Exp6_Sebastian_2_03.mzML	intensity:Exp6_Sebastian_2_04.mzML	intensity:Exp6_Sebastian_2_05.mzML	intensity:Exp6_Sebastian_2_06.mzML	intensity:Exp6_Sebastian_2_07.mzML	intensity:Exp6_Sebastian_2_08.mzML	intensity:Exp6_Sebastian_2_09.mzML	intensity:Exp6_Sebastian_2_10.mzML	intensity:Exp6_Sebastian_2_11.mzML	intensity:Exp6_Sebastian_2_12.mzML	intensity:Exp6_Sebastian_2_13.mzML	intensity:Exp6_Sebastian_2_14.mzML	intensity:Exp6_Sebastian_2_15.mzML	intensity:Exp6_Sebastian_2_16.mzML	intensity:Exp6_Sebastian_2_17.mzML	intensity:Exp6_Sebastian_2_18.mzML	intensity:Exp6_Sebastian_2_19.mzML	intensity:Exp6_Sebastian_2_20.mzML	intensity:Exp6_Sebastian_2_21.mzML	intensity:Exp6_Sebastian_2_22.mzML	intensity:Exp6_Sebastian_2_23.mzML	intensity:Exp6_Sebastian_2_24.mzML	intensity:Exp6_Sebastian_2_25.mzML	intensity:Exp6_Sebastian_2_26.mzML	intensity:Exp6_Sebastian_2_27.mzML	intensity:Exp6_Sebastian_2_28.mzML	intensity:Exp6_Sebastian_2_29.mzML	intensity:Exp6_Sebastian_2_30.mzML	name	intensity:Exp6_Sebastian_2_01.mzML	intensity:Exp6_Sebastian_2_02.mzML	intensity:Exp6_Sebastian_2_03.mzML	intensity:Exp6_Sebastian_2_04.mzML	intensity:Exp6_Sebastian_2_05.mzML	intensity:Exp6_Sebastian_2_06.mzML	intensity:Exp6_Sebastian_2_07.mzML	intensity:Exp6_Sebastian_2_08.mzML	intensity:Exp6_Sebastian_2_09.mzML	intensity:Exp6_Sebastian_2_10.mzML	intensity:Exp6_Sebastian_2_11.mzML	intensity:Exp6_Sebastian_2_12.mzML	intensity:Exp6_Sebastian_2_13.mzML	intensity:Exp6_Sebastian_2_14.mzML
					Ctrl.	Fento 1 µM	Fento 2 µM	Erastin 10 µM	RSL3 100 nM	iFSP1 10 µM	Ctrl.	Fento 1 µM	Fento 2 µM	Erastin 10 µM	RSL3 100 nM	iFSP1 10 µM	Ctrl.	Fento 1 µM	Fento 2 µM	Erastin 10 µM	RSL3 100 nM	iFSP1 10 µM	Ctrl.	Fento 1 µM	Fento 2 µM	Erastin 10 µM	RSL3 100 nM	iFSP1 10 µM	Ctrl.	Fento 1 µM	Fento 2 µM	Erastin 10 µM	RSL3 100 nM	iFSP1 10 µM
###	Phosphatidylserine			0	1	2	3	4	5	6	7	8	9	10	11	12	13	14	15	16	17	18	19	20	21	22	23	24	25	26	27	28	29	30
762.529	H77 C40 N1 O10 P1	0.32ppm	PS 34:0	6909193	4.33483e+06	4.62892e+06	4.04212e+06	4.44377e+06	4.7192e+06	5063924	4694865	4.75764e+06	5.69999e+06	4.93027e+06	4.98685e+06	6.19397e+06	5.63897e+06	4.78687e+06	3.42497e+06	6.07048e+06	5.56607e+06	4.85036e+06	6.83114e+06	5.87025e+06	4.97954e+06	6.33117e+06	6.74306e+06	4.56482e+06	6.16349e+06	3.75385e+06	5.16147e+06	5975537	6.51024e+06	6.83321e+06		1	2	3	4	5	6	7	8	9	10	11	12	13	14
734.498	H73 C38 N1 O10 P1	0.69ppm	PS 32:0	0	271130	370923	305559	296407	465542	390630	374711	328377	300555	278222	400440	584393	211392	377115	248410	333635	365111	303013	424175	324050	299613	341851	419064	413659	303900	304933	342217	378120	445951	488263	PS 32:0	3.12734	4.00658	3.77968	3.33509	4.93242	3.85699	3.99064	3.45105	2.63645	2.82157	4.01496	4.71743	1.87438	3.93906
732.483	H71 C38 N1 O10 P1	0.75ppm	PS 32:1	0	259676	290518	288600	359826	347372	307342	253834	280831	372995	357275	385483	408444	155828	210632	251514	226947	296537	217866	237536	205210	219063	220445	245137	155476	204478	214301	194827	209402	165916	328905	PS 32:1	2.99523	3.13807	3.5699	4.04867	3.6804	3.03462	2.70331	2.95137	3.27189	3.62328	3.865	3.2971	1.3817	2.2001
760.514	H75 C40 N1 O10 P1	0.44ppm	PS 34:1	0	3.21818e+06	3.79934e+06	3.78545e+06	3.83831e+06	4.86021e+06	4.33689e+06	4.14336e+06	4006997	4.43722e+06	4.07935e+06	4.75945e+06	5646987	2.5413e+06	4443733	3.16262e+06	4.22457e+06	4.12853e+06	3.76416e+06	4.18475e+06	3.84606e+06	4.12054e+06	4.126e+06	4.14616e+06	3.71515e+06	2.9276e+06	3.77912e+06	3.37045e+06	3.7756e+06	4.35715e+06	4.60302e+06	PS 34:1	37.1201	41.0392	46.825	43.1876	51.494	42.8214	44.1265	42.1112	38.923	41.3705	47.7201	45.5845	22.5333	46.4158
788.545	H79 C42 N1 O10 P1	0.53ppm	PS 36:1	0	9.27992e+06	1.12819e+07	1.1121e+07	1.10485e+07	1.42471e+07	1.29145e+07	1.24836e+07	12642602	13456229	1.23824e+07	1.35018e+07	1.74556e+07	9356010	1.66121e+07	1.3373e+07	1.43384e+07	1.43962e+07	14569064	1.55571e+07	1.43631e+07	1.50885e+07	1.48546e+07	1.62279e+07	1.39478e+07	1.14385e+07	1.45555e+07	1.30568e+07	1.4994e+07	1.82166e+07	17708897	PS 36:1	107.039	121.864	137.564	124.314	150.948	127.515	132.949	132.866	118.037	125.576	135.374	140.908	82.9585	173.517
816.577	H83 C44 N1 O10 P1	0.83ppm	PS 38:1	0	2.64651e+06	2.37621e+06	1776301	1758424	2.63729e+06	2.36424e+06	2.4476e+06	1.68282e+06	2.03667e+06	2169662	2.34713e+06	3.01272e+06	1.39534e+06	4.25408e+06	3.65044e+06	2.09038e+06	2.0298e+06	2.41065e+06	2.32489e+06	1.94088e+06	3.14603e+06	2.11696e+06	1.94941e+06	2.57658e+06	1737345	2.47551e+06	2.18279e+06	2494499	2.19613e+06	2.09177e+06	PS 38:1	30.5261	25.667	21.9724	19.7853	27.9421	23.344	26.0668	17.6854	17.8655	22.0035	23.5332	24.3198	12.3723	44.4349
844.608	H87 C46 N1 O10 P1	0.45ppm	PS 40:1	0	3.71155e+06	2.65173e+06	2.25847e+06	2.23167e+06	3.22591e+06	3.30437e+06	3.07975e+06	2.08204e+06	2807902	3.03875e+06	3.50811e+06	3.78132e+06	1.98282e+06	6.84915e+06	5.68912e+06	2.73281e+06	2.94066e+06	3.72142e+06	3711671	2.77962e+06	4.61006e+06	2.90752e+06	2.73709e+06	3421920	2.42481e+06	3.29851e+06	3.34753e+06	3.47167e+06	3.19442e+06	2.75335e+06	PS 40:1	42.8108	28.6431	27.9367	25.1101	34.1786	32.6266	32.7992	21.881	24.6307	30.8173	35.1736	30.5242	17.5815	71.541
872.639	H91 C48 N1 O10 P1	0.84ppm	PS 42:1	0	353742	302794	215688	241301	352195	322177	310714	304331	314847	314306	275288	434437	304292	557310	396749	310795	288015	431617	407820	289108	562391	311625	322474	339725	283907	356859	352982	436095	486269	363699	PS 42:1	4.08023	3.27068	2.668	2.71505	3.73151	3.1811	3.30908	3.19834	2.76182	3.18751	2.76014	3.50693	2.69812	5.82123
842.592	H85 C46 N1 O10 P1	0.45ppm	PS 40:2	0	1.17976e+06	934758	750424	783277	1047329	969864	1.08265e+06	709700	740671	958932	1.00642e+06	1.13609e+06	580344	1.48286e+06	1.37292e+06	907108	959813	1.17355e+06	827851	899060	1.17431e+06	791082	875936	909909	692746	775016	843227	1.09538e+06	909540	935902	PS 40:2	13.608	10.0969	9.28254	8.81321	11.0965	9.57621	11.5302	7.45854	6.49712	9.72494	10.0907	9.17093	5.14584	15.4888
870.624	H89 C48 N1 O10 P1	0.67ppm	PS 42:2	0	401859	373551	306350	269251	360364	396038	412106	306549	373059	376665	329846	450515	210670	593570	435611	365153	379077	403810	387882	289219	443112	410070	426631	380011	271117	314614	369086	479683	415568	430722	PS 42:2	4.63524	4.03497	3.78947	3.02954	3.81806	3.91039	4.3889	3.22166	3.27245	3.81992	3.30716	3.63672	1.86798	6.19998
758.498	H73 C40 N1 O10 P1	0.57ppm	PS 34:2	0	249108	301112	244863	295860	341993	275762	284677	273327	230576	276965	338948	368630	184018	359212	208319	276203	234790	246292	304503	227912	302572	308371	212201	286164	161949	270554	257695	314176	267266	307627	PS 34:2	2.87333	3.2525	3.02889	3.32894	3.62342	2.72281	3.03179	2.8725	2.0226	2.80883	3.39842	2.97572	1.63166	3.75206
786.53	H77 C42 N1 O10 P1	0.65ppm	PS 36:2	0	1.69761e+06	2237846	2.03306e+06	2.27935e+06	2761729	2271565	2.70413e+06	2.20363e+06	2.76681e+06	2.56032e+06	2.72293e+06	3.26535e+06	1.57801e+06	2.9989e+06	2.29927e+06	2.61303e+06	2.63599e+06	2.65289e+06	2.53337e+06	2.43261e+06	2.62128e+06	2.67323e+06	2.96932e+06	2.49347e+06	1.8521e+06	2.56217e+06	2.37259e+06	2679320	3.00566e+06	3.40323e+06	PS 36:2	19.5811	24.1724	25.1484	25.6466	29.2605	22.4289	28.7988	23.1589	24.2703	25.9654	27.3011	26.3591	13.992	31.3242
812.545	H79 C44 N1 O10 P1	0.76ppm	PS 38:3	0	1.03065e+06	1.28852e+06	1.07745e+06	1.2106e+06	1.44267e+06	1.59207e+06	1.42928e+06	1.18088e+06	1382928	1.13656e+06	1.32751e+06	1.90205e+06	884966	1.42825e+06	967071	1.31276e+06	1303549	1.38019e+06	1.58192e+06	1.15172e+06	1.18989e+06	1.37251e+06	1.43821e+06	1.41332e+06	1.17439e+06	1.17786e+06	1025366	1.36315e+06	1.6928e+06	1.74109e+06	PS 38:3	11.888	13.9182	13.3278	13.6214	15.2851	15.7197	15.2217	12.4104	12.131	11.5264	13.3101	15.3541	7.84688	14.9184
810.53	H77 C44 N1 O10 P1	0.80ppm	PS 38:4	0	986043	888731	816587	907297	1.27665e+06	1247042	1.35892e+06	777542	1.25128e+06	1.21346e+06	991089	1.5549e+06	435090	1.018e+06	496449	924858	788565	635140	1.03069e+06	570453	0	985632	0	820003	552769	397880	474905	749572	1231542	704915	PS 38:4	11.3735	9.59977	10.101	10.2087	13.5261	12.313	14.4724	8.17151	10.9762	12.3063	9.93703	12.5517	3.85789	10.6333
808.515	H75 C44 N1 O10 P1	2.03ppm	PS 38:5	0	221582	281704	193155	185716	327586	289727	301563	201878	229859	249435	192140	364155	120613	133984	108199	199562	159384	184428	270815	176941	116493	225838	266126	239968	173698	87079.5	143502	237562	148466	201513	PS 38:5	2.55584	3.04287	2.38928	2.08962	3.47077	2.86069	3.21163	2.12162	2.01631	2.52963	1.92647	2.93959	1.06946	1.3995
806.498	H73 C44 N1 O10 P1	0.76ppm	PS 38:6	0	72594.4	123783	99258.7	41799.2	232362	106190	147323	112608	142479	106373	121002	204562	61840.7	72162.3	48252.1	58894.7	112664	97604.6	114452	86883.2	53196.4	94944	81819.9	83634.9	88629.4	60550.9	0	97790.7	105976	146091	PS 38:6	0.837339	1.33706	1.2278	0.470313	2.46187	1.04849	1.56898	1.18345	1.24981	1.07877	1.21321	1.6513	0.548334	0.753752
784.514	H75 C42 N1 O10 P1	0.49ppm	PS 36:3	22411.8	162455	229697	181839	189887	273699	253926	189830	214632	191706	272774	214972	285118	90759.4	246024	148560	233885	235203	169866	198797	162540	166103	210344	229769	168202	176733	153490	143559	244100	321286	230395	PS 36:3	1.87383	2.48111	2.2493	2.13656	2.89984	2.50721	2.02168	2.25566	1.68163	2.76632	2.15539	2.30157	0.804752	2.56978
782.498	H73 C42 N1 O10 P1	0.52ppm	PS 36:4	0	60759.2	122574	119940	85235.6	73580	100022	94341.7	68070.2	95721.8	70577.5	60544.7	145704	36193	92578	66970.5	0	47787.6	49608.4	39913.4	40032.3	81770.9	32113.9	106955	40676.7	39093.9	101946	46096.7	0	78688.7	0	PS 36:4	0.700826	1.324	1.48363	0.959047	0.779581	0.98759	1.00473	0.715378	0.839666	0.715757	0.607044	1.17618	0.320919	0.966999
840.576	H83 C46 N1 O10 P1	0.44ppm	PS 40:3	0	1.19384e+06	974745	779085	556596	952793	1.00357e+06	1.12675e+06	651878	804689	782565	917578	1.17406e+06	609908	1.11921e+06	993707	751311	805218	991077	1.06639e+06	671502	801637	898803	742247	1.12009e+06	909751	575650	703492	993689	1.00394e+06	823838	PS 40:3	13.7704	10.5289	9.63707	6.26266	10.0949	9.909	11.9998	6.85086	7.05868	7.93633	9.19999	9.47745	5.40798	11.6905
838.561	H81 C46 N1 O10 P1	0.47ppm	PS 40:4	0	2438648	2.70267e+06	2.5398e+06	2.27896e+06	3.36244e+06	3.09221e+06	3.16765e+06	2.49254e+06	3.14677e+06	2.80077e+06	3.00472e+06	4.1764e+06	1.75577e+06	2.70985e+06	1.61886e+06	2.68068e+06	2.46975e+06	2.50741e+06	2.80219e+06	2181414	2.13346e+06	2.7307e+06	2716700	2.18052e+06	1.99993e+06	1.67244e+06	1.77327e+06	2.84835e+06	3.17551e+06	2.76975e+06	PS 40:4	28.1286	29.1933	31.4167	25.6422	35.6251	30.5318	33.7353	26.1951	27.6032	28.4038	30.1264	33.7134	15.5682	28.3051
836.545	H79 C46 N1 O10 P1	0.21ppm	PS 40:5	0	2316762	3.15121e+06	2751931	2.3311e+06	2.80975e+06	3.39436e+06	3.4439e+06	3.02893e+06	3.34728e+06	2.73791e+06	3.31898e+06	4.64822e+06	2.38165e+06	3.28331e+06	1753711	3.73267e+06	3047425	3.28434e+06	3.82154e+06	2.68268e+06	1.98565e+06	3.86612e+06	3.95489e+06	3.36153e+06	2.87788e+06	1.66778e+06	2.11615e+06	3.77368e+06	4.17255e+06	3.80066e+06	PS 40:5	26.7227	34.0383	34.0406	26.2289	29.7693	33.5152	36.6773	31.8323	29.3621	27.7663	33.2773	37.5221	21.1177	34.295
834.53	H77 C46 N1 O10 P1	1.72ppm	PS 40:6	36168.2	1.97786e+06	2.34488e+06	2.31052e+06	1.88342e+06	2.6107e+06	2.60529e+06	3.01356e+06	2.35402e+06	2.98579e+06	2434331	2.65563e+06	3.72466e+06	1.9723e+06	2.84926e+06	1.68707e+06	2.95986e+06	2.60975e+06	2.66938e+06	3174411	2.21857e+06	1.84419e+06	2.85935e+06	3.10813e+06	2.83063e+06	2.22683e+06	1.61283e+06	1.74977e+06	3011031	3.74369e+06	3.19258e+06	PS 40:6	22.8136	25.3286	28.5806	21.1917	27.6604	25.7241	32.0942	24.7394	26.1911	24.6876	26.6263	30.0668	17.4881	29.7612
832.514	H75 C46 N1 O10 P1	1.12ppm	PS 40:7	0	137377	123615	114831	82643.2	70634.4	128303	135043	66165.4	117133	109616	87586.6	146782	82179.2	55346.1	42166.8	112427	140978	79666.3	138857	68616.3	0	124511	61097	154704	49463.1	0	64378.9	58220.3	110178	117816	PS 40:7	1.58457	1.33525	1.42043	0.929878	0.748372	1.26684	1.4382	0.69536	1.02748	1.11166	0.878176	1.18488	0.728672	0.578103
756.482	H71 C40 N1 O10 P1	0.42ppm	PS 34:3	0	0	0	30976.7	0	36116	0	36594.8	0	0	0	0	59337.1	0	0	32475.6	0	0	30358.6	0	35277.9	0	0	36549.7	0	0	0	0	0	30617.3	28066.7	PS 34:3	0	0	0.383173	0	0.382649	0	0.389732	0	0	0	0	0.478991	0	0
814.561	H81 C44 N1 O10 P1	0.86ppm	PS 38:2	0	491903	585193	680359	614131	781405	619146	677438	555565	661741	660624	693095	724122	453784	1.09211e+06	713122	685298	492369	705619	686504	516264	732425	798217	698911	616102	616477	754399	522031	779381	815744	761346	PS 38:2	5.67384	6.32105	8.41585	6.91003	8.27899	6.1133	7.21467	5.83867	5.80475	6.69968	6.94923	5.84537	4.02364	11.4073
868.608	H87 C48 N1 O10 P1	0.74ppm	PS 42:3	0	1.25988e+06	929234	730083	646670	990077	1.1324e+06	1.20079e+06	595892	915464	773998	947004	1.22121e+06	555002	1239859	1.12888e+06	937487	847606	942889	1.20332e+06	679382	833567	798622	708176	892482	731961	555830	632578	1.00442e+06	1.01537e+06	908396	PS 42:3	14.5321	10.0373	9.03093	7.27615	10.4899	11.1811	12.7883	6.26248	8.03039	7.84944	9.49502	9.85807	4.92114	12.9506
866.592	H85 C48 N1 O10 P1	0.48ppm	PS 42:4	0	1.15309e+06	881001	631708	489605	853501	1.07961e+06	1.04752e+06	628062	720835	764671	711203	1.06111e+06	500958	1029674	678229	849867	753189	747575	900946	434540	531658	770970	656189	874707	647561	392386	576637	977886	1.01879e+06	656068	PS 42:4	13.3003	9.51627	7.81406	5.50889	9.04285	10.6598	11.156	6.60057	6.32312	7.75486	7.13079	8.56568	4.44193	10.7552
###	PhosphatidylserineOx1																																			0	0	0	0	0	0	0	0	0	0	0	0	0	0
834.588	H85 C44 N1 O11 P1	1.23ppm	PSOx1 38:0	0	0	33052.1	0	64046.6	28185.9	0	0	0	0	0	46026	0	0	87863.9	114493	0	0	46122	0	0	215487	0	0	0	0	91061.3	58526.6	0	0	0	PSOx1 38:0	0	0.357017	0	0.720634	0.29863	0	0	0	0	0	0.461474	0	0	0.917759
804.54	H79 C42 N1 O11 P1	0.83ppm	PSOx1 36:1	0	0	110638	71126.9	115666	135180	0	99489.1	96463.2	91411.6	61872.8	45683.6	60214.3	0	141804	95194.3	0	78790.6	0	0	153274	138632	56582.1	110191	0	36118.6	186438	117162	0	0	200727	PSOx1 36:1	0	1.19508	0.879821	1.30144	1.43223	0	1.05955	1.01377	0.801857	0.627479	0.458041	0.486072	0	1.48118
832.572	H83 C44 N1 O11 P1	0.74ppm	PSOx1 38:1	0	40642.6	0	47297.3	52062.4	0	0	42896.7	27486.1	0	55052.7	0	0	0	81443.8	127068	48255.9	0	48160.8	0	53123.5	111758	33989	0	33819.6	28440.7	164631	84829.3	0	0	0	PSOx1 38:1	0.468792	0	0.585055	0.585792	0	0	0.456847	0.288863	0	0.558313	0	0	0	0.8507
860.602	H87 C46 N1 O11 P1	0.19ppm	PSOx1 40:1	0	0	31944.4	0	0	0	52364.8	0	42311	0	104572	60475.1	53973.7	72132.5	148661	161972	0	0	0	0	55043.4	105627	0	0	52354.1	0	141125	70935.3	0	0	0	PSOx1 40:1	0	0.345052	0	0	0	0.517038	0	0.444664	0	1.06051	0.606346	0.435695	0.63959	1.5528
858.587	H85 C46 N1 O11 P1	0.64ppm	PSOx1 40:2	0	0	0	0	0	0	0	0	0	0	0	0	0	0	48906.1	132734	0	0	0	0	39788.6	92837.2	0	0	0	0	88836.2	61990.8	0	0	0	PSOx1 40:2	0	0	0	0	0	0	0	0	0	0	0	0	0	0.510836
802.525	H77 C42 N1 O11 P1	1.70ppm	PSOx1 36:2	0	0	0	0	38543.1	0	0	0	0	0	43841.7	37210.7	0	37373.9	45895.9	67220.9	0	0	0	0	68339.5	101386	0	0	57181.6	0	82328.9	49608.1	0	62101.3	0	PSOx1 36:2	0	0	0	0.433676	0	0	0	0	0	0.444618	0.373089	0	0.33139	0.479394
790.43	H65 C42 N1 O11 P1	-0.57ppm	PSOx1 36:8	0	0	28612	52042.1	0	0	0	0	0	0	37483.3	0	0	30661.5	83550.8	0	0	0	0	0	42761.5	0	0	0	0	0	0	0	0	0	0	PSOx1 36:8	0	0.309057	0.643747	0	0	0	0	0	0	0.380134	0	0	0.271872	0.872708
826.525	H77 C44 N1 O11 P1	0.97ppm	PSOx1 38:4	0	0	0	0	57581.7	0	0	0	0	0	56423.1	0	0	0	58109.1	53348.6	0	0	0	0	26907.5	46118.5	0	0	0	0	27995.5	0	0	0	0	PSOx1 38:4	0	0	0	0.647893	0	0	0	0	0	0.572211	0	0	0	0.606963
856.572	H83 C46 N1 O11 P1	1.03ppm	PSOx1 40:3	0	0	0	0	0	0	0	0	0	0	0	0	0	0	0	41038.1	0	0	0	0	33127.5	73996.2	0	0	0	0	82494.9	0	0	0	0	PSOx1 40:3	0	0	0	0	0	0	0	0	0	0	0	0	0	0
854.556	H81 C46 N1 O11 P1	0.70ppm	PSOx1 40:4	0	0	0	0	62377.5	55909.7	0	0	46805.5	0	44836.7	37527.5	0	0	87572.6	46483.3	43714.9	0	33806.8	0	67468.3	75305.9	0	38265.5	0	0	88839.7	79638.7	0	0	0	PSOx1 40:4	0	0	0	0.701854	0.592364	0	0	0.491899	0	0.454708	0.376265	0	0	0.914717
852.54	H79 C46 N1 O11 P1	0.99ppm	PSOx1 40:5	0	0	0	0	62727.9	77372	0	0	33128.1	44426.2	0	64597.1	35791.5	0	97981	98417.6	0	52765.8	56697.2	0	76379.8	93744.7	0	0	0	0	98980	91985.6	0	0	0	PSOx1 40:5	0	0	0	0.705797	0.819757	0	0	0.348157	0.389704	0	0.647675	0.288922	0	1.02343
850.525	H77 C46 N1 O11 P1	1.12ppm	PSOx1 40:6	0	0	0	0	0	55234.6	0	0	0	0	40099.3	68830.9	0	0	96638.2	40664.1	0	29396.8	0	0	45342.5	69516	0	0	0	0	0	64315.3	0	0	0	PSOx1 40:6	0	0	0	0	0.585211	0	0	0	0	0.406664	0.690125	0	0	1.00941
884.603	H87 C48 N1 O11 P1	0.60ppm	PSOx1 42:3	0	0	0	0	0	0	0	0	0	0	0	0	0	0	61328.7	76653.8	0	0	0	0	0	0	0	0	0	0	0	0	0	0	0	PSOx1 42:3	0	0	0	0	0	0	0	0	0	0	0	0	0	0.640593
882.587	H85 C48 N1 O11 P1	0.68ppm	PSOx1 42:4	0	0	0	0	0	0	0	0	36070.8	0	0	0	0	0	62255	46769.6	0	0	0	0	0	65535.1	0	0	0	0	53604.1	0	36510.8	0	0	PSOx1 42:4	0	0	0	0	0	0	0	0.379083	0	0	0	0	0	0.650268
																																				0	0	0	0	0	0	0	0	0	0	0	0	0	0
###	PhosphatidylserineOx2																																			0	0	0	0	0	0	0	0	0	0	0	0	0	0
850.581	H85 C44 N1 O12 P1	-0.37ppm	PSOx2 38:0	0	0	0	0	49201.6	0	0	0	0	0	0	0	0	0	139979	86013.3	0	0	0	0	0	93955.1	0	0	0	0	100126	31107.4	0	45389.8	0	PSOx2 38:0	0	0	0	0.553603	0	0	0	0	0	0	0	0	0	1.46211
792.504	H75 C40 N1 O12 P1	0.66ppm	PSOx2 34:1	0	44257.5	81057.8	104884	59842	124605	112357	111336	139451	79267	99874.4	92837.8	142763	64192.1	90370.8	44352.7	122252	188585	95439.4	139143	104762	81909	103705	92842.2	124807	136090	196491	98036.9	100489	117301	151136	PSOx2 34:1	0.510488	0.875558	1.29738	0.673325	1.32019	1.10938	1.18572	1.46555	0.695325	1.01287	0.930827	1.15243	0.569183	0.943944
848.567	H83 C44 N1 O12 P1	0.73ppm	PSOx2 38:1	16661.8	0	0	0	51772.6	36661	0	48949.8	0	0	0	0	0	0	140345	210900	0	0	30915.1	51593.1	73654.3	103190	0	0	46957.3	0	57703.6	76476.4	0	0	0	PSOx2 38:1	0	0	0	0.582531	0.388424	0	0.521312	0	0	0	0	0	0	1.46593
876.598	H87 C46 N1 O12 P1	0.70ppm	PSOx2 40:1	0	0	0	0	52553.3	51031.5	37055.2	0	0	0	53442.9	41682	0	0	179394	195599	0	0	43550.3	0	0	181272	0	0	0	0	190889	99046.9	0	0	0	PSOx2 40:1	0	0	0	0.591315	0.540679	0.365874	0	0	0	0.541987	0.41792	0	0	1.87381
790.488	H73 C40 N1 O12 P1	0.67ppm	PSOx2 34:2	0	59803.9	67428.5	136291	88854.1	140051	79162	92648.6	81639.8	105625	85108.3	85594.4	109846	0	51568.1	74879.4	88934	75330.4	50921	38763.1	82378	74356.2	58689.1	74208	75421	77941.4	134646	98339.8	97538.7	112534	105484	PSOx2 34:2	0.689807	0.728339	1.68588	0.999761	1.48384	0.781627	0.986701	0.857987	0.926533	0.86312	0.858202	0.886716	0	0.538641
846.551	H81 C44 N1 O12 P1	0.41ppm	PSOx2 38:2	0	1.56699e+06	3.18709e+06	3.75437e+06	3.09354e+06	3968299	3.14148e+06	3735985	4.16305e+06	3.82375e+06	3.55243e+06	3.71278e+06	4.58423e+06	3.02249e+06	3.4575e+06	2.56541e+06	5.00852e+06	4.49218e+06	4.23953e+06	4.53359e+06	4.48525e+06	4.46635e+06	4.86226e+06	4.88933e+06	4.82916e+06	3.76787e+06	4.9025e+06	4.02002e+06	5.24783e+06	6.35516e+06	5.85918e+06	PSOx2 38:2	18.0744	34.4259	46.4406	34.8076	42.0442	31.0183	39.788	43.7513	33.5417	36.0267	37.2258	37.0056	26.8	36.1144
874.582	H85 C46 N1 O12 P1	0.52ppm	PSOx2 40:2	0	85201.2	69039.2	161305	117641	170083	93277.5	116004	143700	125335	122630	136804	198774	74516.5	321635	355100	77858.9	176971	117078	140088	185968	290277	163376	133019	184850	73073.5	306254	234223	151426	146245	239343	PSOx2 40:2	0.982752	0.745737	1.9953	1.32366	1.80203	0.921	1.23543	1.51021	1.09943	1.24364	1.37164	1.60458	0.660728	3.35955
762.457	H69 C38 N1 O12 P1	0.50ppm	PSOx2 32:2	0	196064	329715	233118	225171	344998	168586	235918	208456	249220	145381	279055	378710	182830	317085	224347	403266	354255	492191	468486	264747	442163	256519	342675	207541	236569	363141	283119	355160	277695	365876	PSOx2 32:2	2.2615	3.56147	2.88361	2.53356	3.65525	1.66458	2.51251	2.19075	2.18615	1.47438	2.79791	3.05708	1.62113	3.31203
838.488	H73 C44 N1 O12 P1	0.15ppm	PSOx2 38:6	0	0	0	0	0	82709.6	0	30344.6	0	52510.1	0	0	0	0	0	0	0	0	42584	0	0	0	0	0	0	0	0	0	0	0	0	PSOx2 38:6	0	0	0	0	0.876309	0	0.323168	0	0.460615	0	0	0	0	0
844.535	H79 C44 N1 O12 P1	0.26ppm	PSOx2 38:3	-1.7	224978	496080	568071	697462	757221	451604	686608	526032	629426	562327	622289	587756	357954	521433	426767	759001	643518	706961	626917	748418	707014	786077	736643	720986	499390	821896	634084	901101	853164	955630	PSOx2 38:3	2.59501	5.35849	7.02689	7.84765	8.02276	4.45903	7.31233	5.5283	5.52129	5.7028	6.23931	4.74458	3.17393	5.44649
840.504	H75 C44 N1 O12 P1	0.82ppm	PSOx2 38:5	0	0	0	0	0	32161.8	0	0	0	0	0	0	0	0	71105.2	63356.8	0	0	37009.3	0	0	48233.3	56458.8	0	59926.4	0	69674	0	0	0	0	PSOx2 38:5	0	0	0	0	0.340754	0	0	0	0	0	0	0	0	0.742711
872.566	H83 C46 N1 O12 P1	0.32ppm	PSOx2 40:3	0	83213	113434	139692	73644.2	131820	88759.5	93461	121075	118438	171182	113151	145607	95070.5	167843	217585	143023	159145	201360	158685	165299	244713	173026	194384	109984	138385	272244	223176	131988	138521	242812	PSOx2 40:3	0.959819	1.22527	1.72795	0.828624	1.39664	0.876391	0.995353	1.27242	1.03893	1.73603	1.1345	1.1754	0.842978	1.75316
870.551	H81 C46 N1 O12 P1	0.42ppm	PSOx2 40:4	0	172762	272891	469177	400989	451976	402082	434147	432029	358876	407425	377413	437520	321848	423325	359656	458132	408656	440534	487201	465130	463135	459018	500605	541074	485736	412438	397419	482279	656191	520093	PSOx2 40:4	1.99272	2.94767	5.80359	4.51182	4.78869	3.97006	4.62364	4.54037	3.14803	4.13187	3.78409	3.53182	2.85378	4.42173
868.535	H79 C46 N1 O12 P1	0.66ppm	PSOx2 40:5	0	197528	468378	452102	484366	529113	436084	452124	575736	375986	493236	545557	709622	304486	350243	291718	614670	479206	333841	410664	463417	453446	485027	492777	536701	333137	481897	263032	441847	652004	615566	PSOx2 40:5	2.27838	5.05926	5.59238	5.44994	5.60596	4.30579	4.81509	6.05066	3.29813	5.00212	5.46996	5.72833	2.69984	3.65837
866.519	H77 C46 N1 O12 P1	0.49ppm	PSOx2 40:6	0	43061.7	80641.4	116841	115292	106170	69115.5	92319.4	76192.9	85633.3	129348	160630	146872	55349.1	80921.1	83721.1	76039.5	66738.3	62727.2	97427.9	110311	137614	87630.8	106456	64123.8	62159.8	112415	80978.8	66868.9	124794	103307	PSOx2 40:6	0.496695	0.87106	1.4453	1.29723	1.12487	0.68243	0.983195	0.800743	0.75117	1.31177	1.61053	1.1856	0.490773	0.84524
864.504	H75 C46 N1 O12 P1	0.69ppm	PSOx2 40:7	0	0	41242.6	50381.5	0	43905.5	40797.9	40180.4	36410	53002.9	40112.5	0	83932.8	0	79285.5	48106.5	0	37867.1	0	0	0	30942.5	0	0	0	0	68983.7	50043.6	36007.2	0	43130.6	PSOx2 40:7	0	0.445488	0.623206	0	0.465179	0.402829	0.427919	0.382648	0.464938	0.406798	0	0.677536	0	0.828156
902.613	H89 C48 N1 O12 P1	0.39ppm	PSOx2 42:2	18201.9	46834.4	65339.6	84317.8	0	80346.3	58756.6	18535.3	74004.7	42152.9	67498.3	39299.6	90925.2	40223.5	106868	22000.5	34274.1	58775.7	104316	33207.3	53415.3	125049	77338.4	42696.1	97095.1	64819.4	93743.5	51474.1	59180	93890.8	97788.6	PSOx2 42:2	0.540211	0.705775	1.04299	0	0.85127	0.580149	0.1974	0.777746	0.369763	0.684529	0.394033	0.733981	0.356657	1.11627
900.597	H87 C48 N1 O12 P1	0.06ppm	PSOx2 42:3	0	87196.1	91828.5	65152.6	110822	64967.8	0	133354	65371.9	68438.3	69539.1	126768	116242	91147.2	169947	121121	61717.3	65169.5	64961.6	101088	80147	232775	53193.7	7982.1	60854	71084.5	155885	117497	129524	63049.6	133502	PSOx2 42:3	1.00576	0.991899	0.80592	1.24694	0.688334	0	1.42021	0.687021	0.600337	0.705226	1.27102	0.938345	0.80819	1.77514
898.583	H85 C48 N1 O12 P1	2.11ppm	PSOx2 42:4	0	71435.9	207269	133017	108621	175066	85802.5	94527.4	155094	187970	128436	136278	253382	152640	211063	242209	207546	183397	207548	223167	217459	322778	232869	258713	228111	212768	262905	201707	211940	163703	180606	PSOx2 42:4	0.823977	2.23885	1.64539	1.22218	1.85483	0.847194	1.00671	1.62994	1.64886	1.30252	1.36637	2.04539	1.35344	2.20461
896.567	H83 C48 N1 O12 P1	0.86ppm	PSOx2 42:5	0	396537	859508	913074	756048	1093251	820836	927679	920726	967484	816251	965660	1118921	687208	596208	439121	916611	943180	781552	958158	858282	684855	1.1277e+06	894371	1.0313e+06	766034	624701	629300	930337	1.19966e+06	1.26779e+06	PSOx2 42:5	4.57385	9.28411	11.2945	8.50685	11.583	8.10474	9.87972	9.6763	8.48671	8.27795	9.68207	9.03234	6.09338	6.22754
894.551	H81 C48 N1 O12 P1	0.76ppm	PSOx2 42:6	0	610500	1.09344e+06	1428941	1.06237e+06	1.36411e+06	1.30626e+06	1.39064e+06	1.5564e+06	1.3505e+06	1.17435e+06	1.25262e+06	2.02843e+06	1099857	1.1082e+06	521390	1.74046e+06	1.53172e+06	1.38707e+06	1.82288e+06	1244199	1.02978e+06	1569366	1409482	1.71231e+06	1.21492e+06	1.04667e+06	901691	1.5477e+06	2.04172e+06	1.95253e+06	PSOx2 42:6	7.04181	11.8109	17.6756	11.9535	14.4528	12.8977	14.8102	16.3569	11.8465	11.9096	12.5592	16.3742	9.75229	11.5754
892.535	H79 C48 N1 O12 P1	0.61ppm	PSOx2 42:7	0	469717	822137	1041344	725496	865964	882818	954945	1.1174e+06	878742	862877	889559	1.26557e+06	888464	665370	410701	1.05863e+06	954376	1.02867e+06	1.15632e+06	853954	747745	1.28737e+06	929378	1.38142e+06	1.05519e+06	711695	659633	1050646	1.61558e+06	1.31938e+06	PSOx2 42:7	5.41794	8.88044	12.8811	8.16308	9.17489	8.71673	10.1701	11.7432	7.70827	8.75081	8.91905	10.2162	7.8779	6.94995
890.519	H77 C48 N1 O12 P1	-0.17ppm	PSOx2 42:8	0	80120.3	103762	57765.7	56977.7	78138.9	96439.8	50852.3	59805.7	115050	48779.9	48072.8	137646	61550.3	51920.8	0	101169	79868.4	50278.7	106334	0	0	45413.5	78531.8	148261	71856.9	0	46197.3	55250.6	101808	58443.2	PSOx2 42:8	0.924147	1.12081	0.714546	0.641097	0.827882	0.952224	0.541574	0.628523	1.00921	0.494698	0.481996	1.11113	0.545759	0.542325
																																				0	0	0	0	0	0	0	0	0	0	0	0	0	0
###	PhosphatidylserineOx3																																			0	0	0	0	0	0	0	0	0	0	0	0	0	0
922.638	H93 C48 N1 O13 P1	-0.81ppm	PSOx3 42:0	0	0	0	61264.3	0	98752.8	87542.4	79613.9	88306.2	80115	0	76382.8	110890	41246.3	87611.1	72813.3	0	111103	72143.3	54387.7	66477.5	71227.6	88688.1	46767.7	44724	94743.4	75755.2	57660.9	0	0	79494.5	PSOx3 42:0	0	0	0.757823	0	1.04629	0.864373	0.847883	0.928047	0.702764	0	0.765843	0.895145	0.365726	0.915119
892.592	H87 C46 N1 O13 P1	-0.36ppm	PSOx3 40:1	0	0	0	0	0	0	0	0	0	0	0	0	0	0	0	0	0	0	0	0	0	27104.4	0	0	0	0	0	39127.2	0	0	0	PSOx3 40:1	0	0	0	0	0	0	0	0	0	0	0	0	0	0
918.609	H89 C48 N1 O13 P1	1.04ppm	PSOx3 42:2	0	0	0	41150.3	0	0	36364.3	0	38383	0	0	0	0	0	0	60759.6	0	0	0	0	0	0	0	0	0	0	0	0	0	0	0	PSOx3 42:2	0	0	0.509018	0	0	0.359053	0	0.403383	0	0	0	0	0	0
882.514	H77 C46 N1 O13 P1	0.27ppm	PSOx3 40:6	0	0	0	0	0	0	0	0	0	0	0	0	0	0	76254.5	0	0	0	0	0	0	0	0	0	0	0	41076.1	55909.8	0	0	0	PSOx3 40:6	0	0	0	0	0	0	0	0	0	0	0	0	0	0.796496
856.499	H75 C44 N1 O13 P1	0.59ppm	PSOx3 38:5	0	0	0	0	0	0	0	0	0	0	0	0	0	0	0	0	0	0	0	0	0	31370.8	0	0	0	0	0	0	0	0	0	PSOx3 38:5	0	0	0	0	0	0	0	0	0	0	0	0	0	0
860.528	H79 C44 N1 O13 P1	-1.88ppm	PSOx3 38:3	0	0	0	0	51498	0	0	27731.4	0	0	0	0	0	0	0	0	0	0	0	0	0	74284.8	0	0	0	0	83088.7	0	0	0	0	PSOx3 38:3	0	0	0	0.579441	0	0	0.295338	0	0	0	0	0	0	0
916.591	H87 C48 N1 O13 P1	-0.63ppm	PSOx3 42:3	0	0	30681	87007.1	0	33479.6	39289.8	48826.7	0	51892.5	0	46021.2	115882	0	63999.3	53960.3	69134.7	0	60607.2	0	38447.6	86814.3	72186.8	105832	0	55599.7	77810.9	75077.6	0	67715	54618.8	PSOx3 42:3	0	0.331405	1.07625	0	0.354717	0.387938	0.520001	0	0.455198	0	0.461426	0.935442	0	0.668488
[truncated: 16 more columns]

## Sheet: PA and PAOx
precursorexpmz$A	sumcomposition	precursorppmdev$A	name	intensity:Exp6_Sebastian_2_00.mzML	intensity:Exp6_Sebastian_2_01.mzML	intensity:Exp6_Sebastian_2_02.mzML	intensity:Exp6_Sebastian_2_03.mzML	intensity:Exp6_Sebastian_2_04.mzML	intensity:Exp6_Sebastian_2_05.mzML	intensity:Exp6_Sebastian_2_06.mzML	intensity:Exp6_Sebastian_2_07.mzML	intensity:Exp6_Sebastian_2_08.mzML	intensity:Exp6_Sebastian_2_09.mzML	intensity:Exp6_Sebastian_2_10.mzML	intensity:Exp6_Sebastian_2_11.mzML	intensity:Exp6_Sebastian_2_12.mzML	intensity:Exp6_Sebastian_2_13.mzML	intensity:Exp6_Sebastian_2_14.mzML	intensity:Exp6_Sebastian_2_15.mzML	intensity:Exp6_Sebastian_2_16.mzML	intensity:Exp6_Sebastian_2_17.mzML	intensity:Exp6_Sebastian_2_18.mzML	intensity:Exp6_Sebastian_2_19.mzML	intensity:Exp6_Sebastian_2_20.mzML	intensity:Exp6_Sebastian_2_21.mzML	intensity:Exp6_Sebastian_2_22.mzML	intensity:Exp6_Sebastian_2_23.mzML	intensity:Exp6_Sebastian_2_24.mzML	intensity:Exp6_Sebastian_2_25.mzML	intensity:Exp6_Sebastian_2_26.mzML	intensity:Exp6_Sebastian_2_27.mzML	intensity:Exp6_Sebastian_2_28.mzML	intensity:Exp6_Sebastian_2_29.mzML	intensity:Exp6_Sebastian_2_30.mzML	name	intensity:Exp6_Sebastian_2_01.mzML	intensity:Exp6_Sebastian_2_02.mzML	intensity:Exp6_Sebastian_2_03.mzML	intensity:Exp6_Sebastian_2_04.mzML	intensity:Exp6_Sebastian_2_05.mzML	intensity:Exp6_Sebastian_2_06.mzML	intensity:Exp6_Sebastian_2_07.mzML	intensity:Exp6_Sebastian_2_08.mzML	intensity:Exp6_Sebastian_2_09.mzML	intensity:Exp6_Sebastian_2_10.mzML	intensity:Exp6_Sebastian_2_11.mzML	intensity:Exp6_Sebastian_2_12.mzML	intensity:Exp6_Sebastian_2_13.mzML	intensity:Exp6_Sebastian_2_14.mzML
					Ctrl.	Fento 1 µM	Fento 2 µM	Erastin 10 µM	RSL3 100 nM	iFSP1 10 µM	Ctrl.	Fento 1 µM	Fento 2 µM	Erastin 10 µM	RSL3 100 nM	iFSP1 10 µM	Ctrl.	Fento 1 µM	Fento 2 µM	Erastin 10 µM	RSL3 100 nM	iFSP1 10 µM	Ctrl.	Fento 1 µM	Fento 2 µM	Erastin 10 µM	RSL3 100 nM	iFSP1 10 µM	Ctrl.	Fento 1 µM	Fento 2 µM	Erastin 10 µM	RSL3 100 nM	iFSP1 10 µM
###	PhosphatidicAcid			0	1	2	3	4	5	6	7	8	9	10	11	12	13	14	15	16	17	18	19	20	21	22	23	24	25	26	27	28	29	30		Normalization
675.497	H72 C37 O8 P1	0.23ppm	PA 34:0	1.13613e+06	1.64248e+06	1.57954e+06	1.14892e+06	1.55419e+06	1.31268e+06	1.62331e+06	1.59752e+06	1.55723e+06	1.72581e+06	1.67927e+06	1880191	1.84456e+06	1.57801e+06	1.45656e+06	1.22825e+06	1.81488e+06	1.13981e+06	1400070	2.31628e+06	1.89404e+06	1594864	1.55574e+06	1.60155e+06	1.43888e+06	1.75532e+06	1.68795e+06	1.09696e+06	1.48538e+06	1.72778e+06	1.59037e+06		1	2	3	4	5	6	7	8	9	10	11	12	13	14
619.434	H64 C33 O8 P1	-0.05ppm	PA 30:0	0	44379.7	0	65005.9	37512.4	107359	36266.6	81876.9	27529.3	58807.4	64829.3	39083.9	56129.1	0	78330.6	36268.3	55589.7	0	33517.7	35854.3	0	38005.6	33098.1	28830.5	38261.5	46228.4	24481.9	31479.3	0	33723.6	88180.3	PA 30:0	0.8106	0	1.6974	0.724089	2.45358	0.670233	1.53757	0.530353	1.02225	1.15817	0.623616	0.912888	0	1.61333
647.466	H68 C35 O8 P1	0.58ppm	PA 32:0	0	156638	129803	224694	212131	243123	190234	141684	218449	168151	185137	150908	204182	79883	125382	120413	69347.7	90994.4	126891	77237.1	70209.7	161232	150200	94860.4	89601.4	99048	74697.8	119602	128750	107628	110824	PA 32:0	2.86101	2.46533	5.8671	4.09469	5.55632	3.51566	2.6607	4.20843	2.92298	3.30747	2.40786	3.32083	1.51868	2.58244
645.45	H66 C35 O8 P1	0.52ppm	PA 32:1	0	182222	83000	187191	61124.7	111342	137460	148735	104834	158014	108128	103201	144050	95688.6	65725.7	82327.5	140099	62969.6	73268.2	145685	37426.7	74594.7	106323	100946	77306	84615.1	132256	71514.6	136372	127275	130991	PA 32:1	3.3283	1.57641	4.88784	1.17987	2.5446	2.54036	2.79311	2.01963	2.74678	1.9317	1.64666	2.34283	1.81916	1.35372
673.481	H70 C37 O8 P1	0.20ppm	PA 34:1	0	469624	284594	528453	311064	487136	391384	384000	440836	522284	360077	444471	476060	150617	380018	325381	373230	299522	294058	544501	315083	262818	377240	299527	255072	325384	250175	249759	306895	333287	422455	PA 34:1	8.57773	5.40526	13.7987	6.00437	11.133	7.23305	7.21118	8.49273	9.07891	6.43276	7.0919	7.74267	2.86343	7.82703
701.513	H74 C39 O8 P1	0.47ppm	PA 36:1	0	118177	161458	209188	178894	246296	183534	178418	253874	149300	159109	179674	209860	136131	230070	271664	195755	211964	157272	237630	164414	244000	239474	145143	206020	255372	174137	244856	154611	268386	214085	PA 36:1	2.15852	3.06654	5.46221	3.45312	5.62884	3.39184	3.35053	4.89089	2.5953	2.84247	2.86685	3.41318	2.58802	4.73863
671.466	H68 C37 O8 P1	0.70ppm	PA 34:2	0	145616	94258.9	175625	89741.4	130550	141275	147226	188257	152022	140438	121620	166662	119804	92334	87877.2	130817	93204.1	88920.8	228588	69840.6	85217.5	157376	142436	104258	104659	72131.9	38654.1	126523	89981.9	176296	PA 34:2	2.65969	1.79025	4.58583	1.73225	2.98358	2.61086	2.76476	3.62677	2.64261	2.50892	1.94055	2.71061	2.27763	1.90175
699.497	H72 C39 O8 P1	0.45ppm	PA 36:2	0	255367	245607	282402	213640	291323	394663	265377	300091	313981	217344	251688	414032	207018	264905	264108	311911	191800	272356	317838	227836	231291	365715	237043	177392	249741	207248	131716	256445	262328	285210	PA 36:2	4.66431	4.66479	7.37394	4.12382	6.65788	7.29365	4.98354	5.78125	5.45797	3.88284	4.01588	6.73385	3.93567	5.45611
697.482	H70 C39 O8 P1	0.52ppm	PA 36:3	0	29920.1	51557.8	64923.3	54795	28098.8	93055.1	84504.3	101192	109501	63886.5	91668.5	87012.6	88981.5	59144.3	42489.9	92394.7	66324.2	34504.6	74054.7	79687.3	43752.4	68448.5	52571.6	81943.2	68942.9	28795.2	0	48332	94566	74894.3	PA 36:3	0.546494	0.979231	1.69525	1.05769	0.642169	1.71973	1.58691	1.94947	1.90347	1.14133	1.46265	1.41518	1.69165	1.21816
695.466	H68 C39 O8 P1	0.64ppm	PA 36:4	0	91701.2	30591.9	57991.7	40318.6	41662.1	61362.5	63012	83110.5	91122	30374.4	49593.3	40663.4	20633.6	79928.6	0	0	25074.1	72578.6	82520.4	32166.7	0	39307.3	27795.8	50891.1	35127.5	0	0	35710	49148.8	0	PA 36:4	1.67493	0.581028	1.51425	0.778257	0.952144	1.13402	1.18331	1.60113	1.58398	0.542637	0.791302	0.661352	0.392271	1.64625
727.529	H76 C41 O8 P1	0.73ppm	PA 38:2	0	0	69253.5	50989.8	0	36035.2	98804.7	31921.2	48444.8	37192.8	38738	48322.3	53418.3	37220.4	86055.7	55276.3	83492.9	71763.1	37414.8	63413.6	46333.3	0	102129	26407.2	42897.3	91930.4	0	0	101342	83819.5	83544.9	PA 38:2	0	1.31532	1.33142	0	0.823547	1.82598	0.599451	0.933291	0.646526	0.692052	0.771022	0.868799	0.707608	1.77244
725.513	H74 C41 O8 P1	0.33ppm	PA 38:3	0	61067.3	57057.8	0	0	38213.8	53408.6	0	0	47843	0	0	33912.7	41295.7	0	76685.6	37453.7	25302.8	27612.2	36825.4	0	0	33242.6	44495.7	34805.3	0	0	37734.9	28023.3	34420.3	38436.4	PA 38:3	1.1154	1.08369	0	0	0.873336	0.987029	0	0	0.831659	0	0	0.551558	0.785085	0
723.498	H72 C41 O8 P1	1.08ppm	PA 38:4	0	141954	136672	146356	124228	112013	130212	86419.6	141524	148469	105217	113246	142959	56535.7	112448	69997.2	120548	99830.8	116329	133788	53746.4	63731.6	146942	131514	96629.6	90415.4	40059.9	96077.1	118043	102904	69952.9	PA 38:4	2.59281	2.5958	3.82158	2.39792	2.55995	2.40642	1.62288	2.72647	2.58085	1.87969	1.80693	2.3251	1.07482	2.31602
721.482	H70 C41 O8 P1	0.33ppm	PA 38:5	0	130188	118592	160669	36482.5	169454	101342	119172	150074	205849	85194.6	87415.9	217415	81924	97330	0	123270	45783.9	84673.1	157252	0	42040.9	155748	90419.4	124198	106020	0	49410.2	70499.2	55108.4	52730.2	PA 38:5	2.3779	2.2524	4.19532	0.70421	3.8727	1.87286	2.23795	2.89117	3.57829	1.522	1.39479	3.53605	1.55748	2.00465
719.466	H68 C41 O8 P1	0.56ppm	PA 38:6	0	77342.1	19869.1	0	0	0	80917.6	28032.2	15129.6	68013.5	0	0	62765.3	0	9032.1	0	37866.4	0	51084.2	49462.4	0	26613.2	46434.7	0	42911.8	24128.5	0	0	42141.2	0	0	PA 38:6	1.41266	0.377371	0	0	0	1.49542	0.526419	0.291472	1.18229	0	0	1.02082	0	0.186029
717.45	H66 C41 O8 P1	-0.19ppm	PA 38:7	18961.2	90184.7	107025	127716	0	104366	110682	88514	120826	64612.7	102861	128892	148083	36131.9	184958	98935.3	62480.3	30318.1	40388.1	34309.9	43252.2	0	33827.1	0	0	38712	60555.2	0	0	37805.1	0	PA 38:7	1.64723	2.03271	3.33487	0	2.38518	2.04547	1.66221	2.32773	1.12317	1.83761	2.05658	2.40843	0.686914	3.80948
749.515	H74 C43 O8 P1	2.53ppm	PA 40:5	0	86323.5	97680	77241.7	0	92817.2	69293.1	0	90348.4	75728.6	0	50301	128805	64273.2	74563	0	45086.8	78665.8	70174.7	93206.3	44690.3	57255.1	0	61719.1	44877.9	51654.8	90613.8	42173.9	52438.4	201825	49954.9	PA 40:5	1.57671	1.85522	2.0169	0	2.12124	1.28059	0	1.74056	1.3164	0	0.802594	2.0949	1.22192	1.53573
745.482	H70 C43 O8 P1	1.05ppm	PA 40:7	0	0	67511.5	41757.1	0	34028.1	24716.9	32844.2	71436	40855.1	45922.6	34867.4	0	53816.8	0	0	0	0	0	31400.2	0	0	0	0	55493.4	0	0	0	36417.7	0	0	PA 40:7	0	1.28224	1.09034	0	0.777677	0.456786	0.616784	1.37622	0.710188	0.820404	0.556338	0	1.02313	0
																																				0	0	0	0	0	0	0	0	0	0	0	0	0	0
																																				0	0	0	0	0	0	0	0	0	0	0	0	0	0
																																				0	0	0	0	0	0	0	0	0	0	0	0	0	0
###	PhosphatidicAcidOx2																																			0	0	0	0	0	0	0	0	0	0	0	0	0	0
679.455	H68 C35 O10 P1	-0.20ppm	PAOx2 32:0	0	0	0	0	32023.7	0	0	0	0	26354.8	0	0	42559.2	0	0	29214.4	30689.2	26407.2	34671.4	26610.1	0	0	0	30952.1	0	0	0	0	0	0	0	PAOx2 32:0	0	0	0	0.618143	0	0	0	0	0.458128	0	0	0.692186	0	0
705.472	H70 C37 O10 P1	0.64ppm	PAOx2 34:1	0	12311	0	14533	0	0	24717.4	18765	0	38481.5	37710.9	34681.2	0	12675	39146.5	36644.3	39298.5	39847.6	0	23007.2	0	32875.1	0	0	0	0	0	79631.3	0	0	31488.2	PAOx2 34:1	0.224862	0	0.379479	0	0	0.456795	0.35239	0	0.668928	0.673703	0.553367	0	0.240968	0.80628
761.534	H78 C41 O10 P1	-0.44ppm	PAOx2 38:1	0	1	38781.9	0	38906.2	96836.8	78092.3	0	63824.4	66532.8	94418.4	70901.8	111795	0	60239.3	-1.6	46089	44065	34155.3	0	8043.3	17761.2	13009.2	12899.3	66982.1	41609	38893.3	0	66156.9	72486.3	0	PAOx2 38:1	1.82651e-05	0.73658	0	0.750994	2.2131	1.4432	0	1.22958	1.15655	1.68678	1.1313	1.81824	0	1.24072
731.487	H72 C39 O10 P1	0.78ppm	PAOx2 36:2	0	105717	0	32447	132060	83387.4	74718	83877.7	66289.7	82384.8	133789	61749.3	72166.3	53704.3	183532	260445	51483.2	92773.7	107490	198840	231467	256148	77827.3	66973.4	76677.5	78068.2	211452	318226	78595.3	0	89276.1	PAOx2 36:2	1.93094	0	0.847241	2.54911	1.90573	1.38084	1.57515	1.27707	1.4321	2.39013	0.985261	1.17372	1.02099	3.78012
703.456	H68 C37 O10 P1	0.28ppm	PAOx2 34:2	0	34194.5	23907.4	38287.1	0	0	0	0	28913.8	0	0	38450.4	0	0	0	0	0	0	0	0	0	32212.8	43402.1	0	0	23551.5	0	29884.8	0	0	0	PAOx2 34:2	0.624566	0.45407	0.999735	0	0	0	0	0.557025	0	0	0.613508	0	0	0
759.518	H76 C41 O10 P1	0.36ppm	PAOx2 38:2	0	40941.1	0	31389.4	107636	92803.1	83187.2	44494.7	0	37404.8	125446	96358.1	0	0	724354	914426	0	94660.9	218312	0	479043	664839	26455.1	106712	62153.2	35812	423078	1.05904e+06	0	0	106454	PAOx2 38:2	0.747794	0	0.819625	2.07767	2.12092	1.53736	0.83557	0	0.650211	2.24108	1.53747	0	0	14.9191
729.472	H70 C39 O10 P1	0.62ppm	PAOx2 36:3	0	0	0	0	0	0	0	0	0	0	0	0	34600.8	21825.4	28443.6	0	0	0	0	0	29948.4	0	0	0	34875.8	0	0	84455.5	0	0	40457.4	PAOx2 36:3	0	0	0	0	0	0	0	0	0	0	0	0.56275	0.414929	0.585838
757.503	H74 C41 O10 P1	0.38ppm	PAOx2 38:3	0	68580.3	53341.4	64441.3	50612.4	53784.6	62724	26294.9	50725.9	71338.1	81237.7	42244.4	0	37704	154673	163105	39444.1	56259.3	71733	36699.9	143470	106941	37562.9	73958.3	47568	27014.3	140644	216954	27722.1	43196.7	81592.2	PAOx2 38:3	1.25263	1.01311	1.68266	0.976954	1.22919	1.15918	0.493794	0.977236	1.24008	1.45131	0.674044	0	0.716802	3.18571
783.518	H76 C43 O10 P1	-0.03ppm	PAOx2 40:4	0	0	0	0	0	0	0	0	0	0	0	0	0	0	70837.4	43411.9	0	0	0	0	24274.3	62984.3	0	0	0	0	39225.1	96261.5	0	0	0	PAOx2 40:4	0	0	0	0	0	0	0	0	0	0	0	0	0	1.459
781.503	H74 C43 O10 P1	0.78ppm	PAOx2 40:5	0	0	31724.1	44473.8	40816.8	35543.6	35140.1	0	0	0	0	37987.7	54553	0	61839.8	80384	0	0	0	0	40199	39085.2	0	38989.1	45289.4	30136.5	51583.1	0	47650.3	0	0	PAOx2 40:5	0	0.602532	1.16128	0.787873	0.812312	0.649414	0	0	0	0	0.606125	0.887254	0	1.27368
[truncated: 16 more columns]

## Sheet: PI and PIOx
precursorexpmz$A	sumcomposition	precursorppmdev$A	name	intensity:Exp6_Sebastian_2_00.mzML	intensity:Exp6_Sebastian_2_01.mzML	intensity:Exp6_Sebastian_2_02.mzML	intensity:Exp6_Sebastian_2_03.mzML	intensity:Exp6_Sebastian_2_04.mzML	intensity:Exp6_Sebastian_2_05.mzML	intensity:Exp6_Sebastian_2_06.mzML	intensity:Exp6_Sebastian_2_07.mzML	intensity:Exp6_Sebastian_2_08.mzML	intensity:Exp6_Sebastian_2_09.mzML	intensity:Exp6_Sebastian_2_10.mzML	intensity:Exp6_Sebastian_2_11.mzML	intensity:Exp6_Sebastian_2_12.mzML	intensity:Exp6_Sebastian_2_13.mzML	intensity:Exp6_Sebastian_2_14.mzML	intensity:Exp6_Sebastian_2_15.mzML	intensity:Exp6_Sebastian_2_16.mzML	intensity:Exp6_Sebastian_2_17.mzML	intensity:Exp6_Sebastian_2_18.mzML	intensity:Exp6_Sebastian_2_19.mzML	intensity:Exp6_Sebastian_2_20.mzML	intensity:Exp6_Sebastian_2_21.mzML	intensity:Exp6_Sebastian_2_22.mzML	intensity:Exp6_Sebastian_2_23.mzML	intensity:Exp6_Sebastian_2_24.mzML	intensity:Exp6_Sebastian_2_25.mzML	intensity:Exp6_Sebastian_2_26.mzML	intensity:Exp6_Sebastian_2_27.mzML	intensity:Exp6_Sebastian_2_28.mzML	intensity:Exp6_Sebastian_2_29.mzML	intensity:Exp6_Sebastian_2_30.mzML	name	intensity:Exp6_Sebastian_2_01.mzML	intensity:Exp6_Sebastian_2_02.mzML	intensity:Exp6_Sebastian_2_03.mzML	intensity:Exp6_Sebastian_2_04.mzML	intensity:Exp6_Sebastian_2_05.mzML	intensity:Exp6_Sebastian_2_06.mzML	intensity:Exp6_Sebastian_2_07.mzML	intensity:Exp6_Sebastian_2_08.mzML	intensity:Exp6_Sebastian_2_09.mzML	intensity:Exp6_Sebastian_2_10.mzML	intensity:Exp6_Sebastian_2_11.mzML	intensity:Exp6_Sebastian_2_12.mzML	intensity:Exp6_Sebastian_2_13.mzML	intensity:Exp6_Sebastian_2_14.mzML
					Ctrl.	Fento 1 µM	Fento 2 µM	Erastin 10 µM	RSL3 100 nM	iFSP1 10 µM	Ctrl.	Fento 1 µM	Fento 2 µM	Erastin 10 µM	RSL3 100 nM	iFSP1 10 µM	Ctrl.	Fento 1 µM	Fento 2 µM	Erastin 10 µM	RSL3 100 nM	iFSP1 10 µM	Ctrl.	Fento 1 µM	Fento 2 µM	Erastin 10 µM	RSL3 100 nM	iFSP1 10 µM	Ctrl.	Fento 1 µM	Fento 2 µM	Erastin 10 µM	RSL3 100 nM	iFSP1 10 µM
###	Phosphatidylinositol			0	1	2	3	4	5	6	7	8	9	10	11	12	13	14	15	16	17	18	19	20	21	22	23	24	25	26	27	28	29	30		Normalization
809.519	H78 C41 O13 P1	0.62ppm	PI 32:0	5.51513e+06	3.70618e+06	3.04849e+06	3.7635e+06	3.54595e+06	3.71078e+06	3.99159e+06	3.72788e+06	3.50211e+06	4.46242e+06	4.22392e+06	3.54878e+06	4.39689e+06	4.51489e+06	2.96176e+06	3.41665e+06	5.16509e+06	4580783	5.0765e+06	6.07164e+06	5.41804e+06	1.27053e+07	4.80031e+06	1.19009e+07	4.37685e+06	5.23791e+06	5.12732e+06	4.28378e+06	5.5638e+06	5.82768e+06	6.82488e+06		1	2	3	4	5	6	7	8	9	10	11	12	13	14
837.549	H82 C43 O13 P1	-0.91ppm	PI 34:0	0	2.29957e+06	1.85843e+06	2.11153e+06	1.81019e+06	2.58918e+06	2.88631e+06	2.42364e+06	2.80531e+06	2.64769e+06	2.4552e+06	2.49937e+06	3.44497e+06	1.78901e+06	2.67823e+06	1.71013e+06	2.66771e+06	2.57676e+06	2.57223e+06	2.8195e+06	2.2535e+06	2.03903e+06	2.90289e+06	3.26415e+06	2.61262e+06	2184530	1.95103e+06	2.05609e+06	2.70672e+06	3.4267e+06	3096059	PI 34:0	31.0234	30.4811	28.0528	25.5247	34.8873	36.1549	32.5069	40.0517	29.6666	29.063	35.2145	39.1751	19.8123	45.2135
805.488	H74 C41 O13 P1	0.73ppm	PI 32:2	0	30093.5	0	41520.9	0	68051.3	0	55052.7	0	45190.5	0	40515.8	59753.5	29599.1	48286.1	46995.7	0	33273	36028.4	0	45894.5	61967	48013	103557	0	0	0	56391	0	0	43169.9	PI 32:2	0.40599	0	0.551626	0	0.916941	0	0.738392	0	0.506345	0	0.570841	0.679497	0.327794	0.815159
833.519	H78 C43 O13 P1	0.82ppm	PI 34:2	0	1309736	705888	1.30469e+06	1200048	1.68909e+06	1.59131e+06	1.39124e+06	1.14462e+06	1.38857e+06	1.46182e+06	1468475	1965147	827002	1.2769e+06	1.08516e+06	1.48459e+06	1.12731e+06	1.38196e+06	1.50877e+06	1.44566e+06	1.37313e+06	1.54709e+06	1.47653e+06	1.20584e+06	1.00483e+06	1.14892e+06	1.52964e+06	1.49942e+06	1.41354e+06	1.78897e+06	PI 34:2	17.6696	11.5777	17.3335	16.9214	22.7593	19.9333	18.66	16.3419	15.5584	17.304	20.6898	22.347	9.1586	21.5564
861.55	H82 C45 O13 P1	0.41ppm	PI 36:2	0	4.35808e+06	2.91069e+06	4.71122e+06	4.36005e+06	6177212	5.03358e+06	5.2654e+06	4.49022e+06	5.33515e+06	4.9781e+06	5.22142e+06	7.10203e+06	3.38085e+06	6.01122e+06	4574344	6.47223e+06	5.46538e+06	6.65218e+06	6.64944e+06	5.75607e+06	5841289	6.07305e+06	5.92421e+06	5.80842e+06	4875536	5.13331e+06	6.39377e+06	6.37326e+06	6.79471e+06	7.71404e+06	PI 36:2	58.7947	47.7399	62.5909	61.4792	83.2334	63.0524	70.6219	64.1074	59.7787	58.9274	73.5663	80.7619	37.4411	101.481
889.582	H86 C47 O13 P1	1.10ppm	PI 38:2	0	159356	240669	201610	202579	244612	284331	244826	257918	304760	205682	242812	256224	188328	329553	263782	340827	327086	416714	229779	197754	339507	385945	378651	362382	284678	299326	320955	444732	442623	392058	PI 38:2	2.14987	3.94734	2.67849	2.85649	3.29597	3.56162	3.28372	3.68232	3.41474	2.43473	3.42106	2.91369	2.08563	5.56347
807.503	H76 C41 O13 P1	0.50ppm	PI 32:1	0	393665	346841	515691	449928	683586	554079	562790	453367	494514	611450	529027	717130	309814	515626	515836	545868	389324	496292	597671	469538	539016	537293	437210	527109	363072	490604	611112	538057	604041	574550	PI 32:1	5.31092	5.68873	6.85122	6.34425	9.21082	6.94059	7.5484	6.47277	5.54087	7.23794	7.45364	8.15497	3.43103	8.70474
835.535	H80 C43 O13 P1	0.46ppm	PI 34:1	0	6.11812e+06	4.00227e+06	6344883	5.62761e+06	7.67293e+06	7000767	6.14537e+06	6069413	7.20785e+06	6.61305e+06	6.84233e+06	9.25051e+06	4.32325e+06	6.83809e+06	5.63932e+06	7.19082e+06	6.44545e+06	7.25269e+06	6.96881e+06	6.88041e+06	7.03176e+06	7.37883e+06	7.43107e+06	6.82465e+06	5.44523e+06	6.25483e+06	7.24137e+06	7.69421e+06	8.35585e+06	9421117	PI 34:1	82.5394	65.6434	84.295	79.3526	103.387	87.694	82.4246	86.6537	80.7617	78.2809	96.4039	105.194	47.8776	115.44
891.597	H88 C47 O13 P1	-0.27ppm	PI 38:1	19850.7	85593.5	144180	127266	104559	114319	127595	121642	171230	100448	0	95088.5	153890	71502	120218	82883.9	105029	159593	99023.2	110944	99409.3	86245.1	124640	132763	116604	97323.9	70498.1	57797.9	185591	163559	103004	PI 38:1	1.15474	2.36478	1.6908	1.47434	1.54037	1.5983	1.63152	2.44468	1.12549	0	1.33973	1.74999	0.791846	2.0295
863.566	H84 C45 O13 P1	0.42ppm	PI 36:1	0	5.43843e+06	3.85763e+06	5.97875e+06	5.21966e+06	7.33851e+06	5.99219e+06	5.9303e+06	5.97289e+06	6.45267e+06	6.07948e+06	6.53444e+06	7.903e+06	4.37354e+06	7.24797e+06	5.40186e+06	7.35766e+06	7109679	7.71065e+06	7.38296e+06	7.41029e+06	7.34062e+06	6.77158e+06	7.9063e+06	7.37508e+06	5.79526e+06	7.04274e+06	8.1603e+06	7.70832e+06	8.94185e+06	9.81083e+06	PI 36:1	73.3697	63.2712	79.4308	73.6002	98.8811	75.0602	79.5399	85.2757	72.3001	71.9649	92.0659	89.8704	48.4346	122.359
831.504	H76 C43 O13 P1	0.74ppm	PI 34:3	0	38790.6	69574.7	93347.6	48234	135943	106288	57550.4	108346	85349.1	75516.2	96260.9	123132	99537.6	81850.8	84079.5	91096.8	92225.7	94082.4	114820	95819.4	77906.3	129141	145542	77840.5	44009.9	73910.2	181307	45361.2	141007	92578.2	PI 34:3	0.523323	1.14113	1.24017	0.680127	1.83173	1.3314	0.771892	1.54687	0.956309	0.893911	1.35625	1.40022	1.10233	1.38179
859.535	H80 C45 O13 P1	0.51ppm	PI 36:3	70795.6	1.04894e+06	760923	965699	951949	1.2006e+06	1.11058e+06	1.05206e+06	1.17971e+06	1.08246e+06	1.14782e+06	1.17011e+06	1.48249e+06	564568	1.00707e+06	996362	1.37113e+06	1.11455e+06	1.25699e+06	1.21825e+06	963920	989895	1.19292e+06	1.21291e+06	1.17207e+06	919353	900170	1.14392e+06	1.13239e+06	1.54528e+06	1.41632e+06	PI 36:3	14.1512	12.4803	12.8298	13.423	16.1772	13.9115	14.1107	16.8429	12.1286	13.5871	16.4861	16.8584	6.25229	17.0013
857.519	H78 C45 O13 P1	0.60ppm	PI 36:4	52602.5	1.6843e+06	1.12415e+06	1.90888e+06	1.25553e+06	2183709	1.93404e+06	1.98354e+06	1.83172e+06	2.09011e+06	1.67405e+06	1.81838e+06	2.58005e+06	1.11358e+06	1.43591e+06	867584	1.87059e+06	1853027	1.89601e+06	1.83249e+06	1.31859e+06	1.3806e+06	2.00467e+06	2.05621e+06	1532025	1.49669e+06	1.1927e+06	1.28419e+06	1.86287e+06	2219962	2.26434e+06	PI 36:4	22.7228	18.4378	25.3605	17.7037	29.4239	24.2264	26.6041	26.1517	23.419	19.8163	25.6198	29.3395	12.3323	24.2408
829.488	H74 C43 O13 P1	0.56ppm	PI 34:4	0	45861.2	29103.5	0	0	0	0	32421.9	42108.1	0	46695.1	56707.4	55912.8	22124.8	45035.5	54073.9	0	0	42376.3	0	75017.3	41100	0	0	0	0	38121.9	36455.7	56512.9	46735.9	45026.7	PI 34:4	0.618712	0.477343	0	0	0	0	0.434857	0.601182	0	0.552746	0.798969	0.635822	0.24502	0.760283
887.566	H84 C47 O13 P1	0.32ppm	PI 38:3	0	2.41451e+06	1.77597e+06	2.24922e+06	2306294	2.9032e+06	2.21103e+06	2.32162e+06	3.19046e+06	2.59215e+06	2.33175e+06	2.37819e+06	3.12329e+06	1.54385e+06	3.13311e+06	2.62261e+06	2.86554e+06	3.75633e+06	3.28992e+06	2.93204e+06	2.80595e+06	3.37181e+06	3.02097e+06	4.177e+06	3.05117e+06	2325195	3.02412e+06	3.55241e+06	3.48263e+06	4.7778e+06	4.22452e+06	PI 38:3	32.5741	29.1287	29.8821	32.5201	39.1186	27.6962	31.1386	45.5506	29.0442	27.6017	33.5071	35.517	17.0973	52.8928
885.55	H82 C47 O13 P1	0.37ppm	PI 38:4	0	3.34823e+07	23244345	3.65052e+07	2.9568e+07	4.204e+07	3.62317e+07	3.5561e+07	3.79414e+07	4.0313e+07	3.50057e+07	36638463	4.97058e+07	2.34017e+07	3.06654e+07	2.34673e+07	4.15151e+07	3.74697e+07	3.86185e+07	4.17701e+07	3.0546e+07	2.91983e+07	3.99746e+07	4.37425e+07	3.8045e+07	3.1367e+07	2.8641e+07	3.06337e+07	4.22589e+07	4.83099e+07	4.92892e+07	PI 38:4	451.709	381.243	484.991	416.926	566.458	453.851	476.961	541.693	451.694	414.374	516.212	565.238	259.161	517.688
883.535	H80 C47 O13 P1	0.56ppm	PI 38:5	0	5.37999e+06	3.48852e+06	6.08071e+06	4.12209e+06	6.1167e+06	6.36053e+06	6.00887e+06	6.09302e+06	6.57157e+06	5.12622e+06	5.21695e+06	8.95952e+06	3.87802e+06	3.59131e+06	2.44941e+06	6.91935e+06	5.69466e+06	5.86382e+06	6.90774e+06	3.95656e+06	3.11909e+06	6.55599e+06	6174313	6.0245e+06	5.39842e+06	3.39371e+06	2.84757e+06	6.66283e+06	8.26803e+06	8.35941e+06	PI 38:5	72.5813	57.2171	80.7853	58.1239	82.418	79.6742	80.5937	86.9907	73.6323	60.6809	73.5033	101.885	42.947	60.628
881.519	H78 C47 O13 P1	0.84ppm	PI 38:6	0	310826	195270	353752	285198	394265	331452	403251	289524	298452	281767	348899	576864	251948	316331	191389	433952	424014	396030	456817	315246	250870	302384	506451	464192	329579	233323	182088	485975	534364	577002	PI 38:6	4.19335	3.20273	4.69977	4.02145	5.31243	4.15189	5.40859	4.13356	3.34406	3.33537	4.91575	6.5599	2.79019	5.34026
915.599	H88 C49 O13 P1	2.48ppm	PI 40:3	50193.6	479390	428517	499752	320189	277278	505990	430647	525957	469138	774750	612783	777416	276129	877483	682886	274847	255797	252668	359546	275894	181018	274528	311579	386830	254362	217071	367332	330163	293683	396803	PI 40:3	6.46744	7.02835	6.63946	4.51485	3.73612	6.33821	5.77603	7.50915	5.25654	9.17098	8.63371	8.84051	3.05798	14.8136
913.582	H86 C49 O13 P1	0.86ppm	PI 40:4	0	1.78807e+06	1.09305e+06	1.9403e+06	1408125	2.20143e+06	1.66806e+06	1.76558e+06	1.93262e+06	1.91667e+06	1.7993e+06	1.98684e+06	2.62077e+06	1.20101e+06	1.62948e+06	1.29033e+06	2.04946e+06	1.94009e+06	2.01915e+06	2.08036e+06	1.74674e+06	1.58411e+06	1.84226e+06	2.22054e+06	1.91167e+06	1.48628e+06	1.35773e+06	1.52143e+06	1.98898e+06	2.47272e+06	2.57616e+06	PI 40:4	24.1228	17.9277	25.7779	19.8554	29.6626	20.8947	23.6807	27.5923	21.4757	21.2989	27.9933	29.8025	13.3005	27.5086
911.566	H84 C49 O13 P1	0.69ppm	PI 40:5	0	2.2074e+06	1.75327e+06	2.52398e+06	1970269	2.88629e+06	2.80661e+06	2.70714e+06	2.70142e+06	3.05281e+06	2.43583e+06	2.57187e+06	3681099	1.78853e+06	2.29239e+06	1.50596e+06	3030362	3.25403e+06	2.88755e+06	3129611	2.35733e+06	2.16654e+06	3.52861e+06	3.73978e+06	2.87698e+06	2.28729e+06	2.03559e+06	2.14227e+06	3.27899e+06	4.26314e+06	3.96988e+06	PI 40:5	29.78	28.7563	33.5324	27.7819	38.8906	35.1565	36.3094	38.5685	34.2057	28.8337	36.236	41.8602	19.8071	38.6999
909.55	H82 C49 O13 P1	0.60ppm	PI 40:6	0	1.51618e+06	1090296	1.45196e+06	1.05274e+06	1.70872e+06	1.6363e+06	1.4955e+06	1.79353e+06	1.83362e+06	1.38856e+06	1.48314e+06	2.02428e+06	1.21843e+06	1181217	1.02175e+06	2.15799e+06	1.99873e+06	2.04981e+06	2.04514e+06	1334977	990126	2.05007e+06	2.32224e+06	1.91577e+06	1.61754e+06	1.21483e+06	1.10462e+06	2.20416e+06	2.78612e+06	2.45084e+06	PI 40:6	20.4547	17.8826	19.2901	14.8442	23.0237	20.4969	20.0584	25.6064	20.5451	16.4369	20.8965	23.0195	13.4935	19.9411
907.535	H80 C49 O13 P1	0.41ppm	PI 40:7	0	225682	179063	294711	167404	345945	225800	207141	274396	300930	269617	263597	334300	273233	199084	118717	394944	334784	411571	315666	157541	146766	394578	390975	266734	387167	138207	91343.7	401206	432631	432083	PI 40:7	3.04467	2.93691	3.91539	2.3605	4.66136	2.82844	2.77827	3.91758	3.37182	3.19155	3.71391	3.80155	3.02591	3.36092
																																				0	0	0	0	0	0	0	0	0	0	0	0	0	0
###	PhosphatidylinositolOx1																																			0	0	0	0	0	0	0	0	0	0	0	0	0	0
853.544	H82 C43 O14 P1	-1.24ppm	PIOx1 34:0	0	0	0	38882.8	38199.4	41592.1	0	0	0	0	38801	0	0	38074.7	71730.7	0	0	0	0	0	46528.4	106708	0	0	31841.3	0	0	45931.6	0	0	0	PIOx1 34:0	0	0	0.516578	0.538634	0.560423	0	0	0	0	0.459301	0	0	0.421657	1.21095
851.529	H80 C43 O14 P1	-0.48ppm	PIOx1 34:1	0	0	0	0	0	47189.7	0	0	0	0	40092.6	0	0	0	0	71049.6	0	0	38204.3	0	100306	146389	0	0	0	0	66087.7	90503.6	0	0	37652.5	PIOx1 34:1	0	0	0	0	0.635847	0	0	0	0	0.47459	0	0	0	0
849.514	H78 C43 O14 P1	0.55ppm	PIOx1 34:2	0	0	0	0	0	0	0	0	0	0	0	0	0	0	49870.2	57041.3	0	0	0	0	29793.9	62034.6	0	0	0	0	48146.1	63026.8	0	0	0	PIOx1 34:2	0	0	0	0	0	0	0	0	0	0	0	0	0	0.841902
877.545	H82 C45 O14 P1	0.87ppm	PIOx1 36:2	0	0	0	0	0	0	0	0	0	0	0	0	0	0	90589.1	55327.1	0	0	0	0	87151.6	182538	0	0	0	0	96197.5	147429	0	0	0	PIOx1 36:2	0	0	0	0	0	0	0	0	0	0	0	0	0	1.52931
875.531	H80 C45 O14 P1	1.83ppm	PIOx1 36:3	0	324723	266076	485712	214802	157639	265930	179977	167627	324061	358283	291332	368822	131596	306081	457019	92604.1	36960.5	32585.1	33009.9	126451	146281	37994.3	76126.2	64777.9	24298.8	142835	211376	86273.6	48610	98361.1	PIOx1 36:3	4.38082	4.36406	6.45293	3.02883	2.12407	3.33113	2.41393	2.39323	3.631	4.24112	4.10467	4.19413	1.45735	5.16722
903.561	H84 C47 O14 P1	0.82ppm	PIOx1 38:3	0	0	0	0	0	0	0	0	0	0	0	0	0	0	0	0	0	0	0	0	53244.4	88668.5	0	55526	0	0	54554.8	77074.3	0	0	0	PIOx1 38:3	0	0	0	0	0	0	0	0	0	0	0	0	0	0
901.545	H82 C47 O14 P1	0.53ppm	PIOx1 38:4	0	69314.1	38251.4	0	488327	411011	0	136821	72719.8	34256.7	523986	359814	42409.8	39740.5	503136	466937	0	102741	353650	0	527361	815740	0	112116	65172.7	50487.6	659085	1.02074e+06	0	45289	152640	PIOx1 38:4	0.935114	0.627383	0	6.8857	5.53807	0	1.83511	1.03823	0.383835	6.2026	5.06954	0.48227	0.440105	8.49387
899.529	H80 C47 O14 P1	0.25ppm	PIOx1 38:5	0	46850.6	43732.7	0	234106	199841	0	86716.3	0	0	277178	229486	0	0	215416	236975	0	58565.8	220917	0	322269	436717	0	58327.6	44718.8	0	326793	379159	0	0	104181	PIOx1 38:5	0.63206	0.717284	0	3.30104	2.69271	0	1.16308	0	0	3.28105	3.23331	0	0	3.63662
927.561	H84 C49 O14 P1	0.49ppm	PIOx1 40:5	0	0	0	0	59212.3	0	0	43584.2	0	0	84564.9	95395.1	0	0	88871.7	60263.2	0	0	0	0	41977.8	111504	0	0	0	0	50793.3	63465	0	0	0	PIOx1 40:5	0	0	0	0.834928	0	0	0.584571	0	0	1.00102	1.34405	0	0	1.50032
925.545	H82 C49 O14 P1	0.23ppm	PIOx1 40:6	0	0	0	0	50464.9	47996	0	0	0	0	0	0	0	0	0	72685.2	0	0	0	0	77308.3	46275	0	0	0	0	53204.2	0	0	0	0	PIOx1 40:6	0	0	0	0.711584	0.646711	0	0	0	0	0	0	0	0	0
																																				0	0	0	0	0	0	0	0	0	0	0	0	0	0
																																				0	0	0	0	0	0	0	0	0	0	0	0	0	0
###	PhosphatidylinositolOx2																																			0	0	0	0	0	0	0	0	0	0	0	0	0	0
891.524	H80 C45 O15 P1	-0.15ppm	PIOx2 36:3	0	45665.2	34412	79735	58905.9	43899.8	44735.5	37595.2	0	46658.4	46185.2	62957.9	48303.6	0	110133	141051	0	81254.4	32027.9	0	58099	127414	0	71552.1	38314	44168.2	73805	158584	33552.7	0	74604	PIOx2 36:3	0.616068	0.56441	1.05932	0.830607	0.591518	0.560372	0.504244	0	0.522792	0.54671	0.887035	0.549293	0	1.85926
889.51	H78 C45 O15 P1	2.42ppm	PIOx2 36:4	0	68584.7	46020	74590.8	0	44281.1	41464.8	0	0	107867	89690.2	57585.1	95570.9	0	63722.3	155879	0	0	0	0	30741.2	46650.5	0	0	0	0	56828	76511.1	0	0	0	PIOx2 36:4	0.925274	0.7548	0.990977	0	0.596655	0.519402	0	0	1.20862	1.06169	0.811336	1.0868	0	1.07575
919.557	H84 C47 O15 P1	2.04ppm	PIOx2 38:3	0	71003.3	0	76602.2	0	44249.8	0	30675.6	0	0	47198.5	0	56821.3	48031	123083	98659.8	0	0	0	0	50471.2	124899	0	0	0	0	70333.7	102883	0	0	0	PIOx2 38:3	0.957903	0	1.0177	0	0.596234	0	0.411435	0	0	0.558705	0	0.646153	0.531918	2.07787
917.54	H82 C47 O15 P1	0.22ppm	PIOx2 38:4	0	46945.9	0	0	262312	134946	0	119610	47577	40381.5	197609	165399	63846.7	0	641419	582496	41855.4	35930.2	162859	44411.7	439057	808758	0	42394.4	0	0	473486	842927	33148.6	46586.4	51580.3	PIOx2 38:4	0.633345	0	0	3.69875	1.8183	0	1.60427	0.679262	0.452462	2.33916	2.33036	0.726044	0	10.8283
915.525	H80 C47 O15 P1	1.26ppm	PIOx2 38:5	0	0	0	0	0	111566	0	0	0	0	133870	139715	0	0	250279	160269	0	0	47581.5	0	133870	217176	0	40566.8	0	0	210372	281725	0	0	0	PIOx2 38:5	0	0	0	0	1.50326	0	0	0	0	1.58467	1.96849	0	0	4.22518
																																				0	0	0	0	0	0	0	0	0	0	0	0	0	0
																																				0	0	0	0	0	0	0	0	0	0	0	0	0	0
###	PhosphatidylinositolOx3																																			0	0	0	0	0	0	0	0	0	0	0	0	0	0
905.505	H78 C45 O16 P1	1.41ppm	PIOx3 36:4	0	0	0	66008.7	0	0	0	0	0	0	69129.5	0	41394	0	46438.5	114098	0	36115	74393.9	0	49348.9	96693.6	0	0	35279.4	0	37105	106356	0	0	0	PIOx3 36:4	0	0	0.87696	0	0	0	0	0	0	0.818309	0	0.470719	0	0.783969
935.552	H84 C47 O16 P1	1.86ppm	PIOx3 38:3	0	0	0	0	57432.5	0	0	0	43593.6	0	52382.2	55553.8	0	0	131633	84651.8	0	45563.4	42284.9	31951.9	140758	215247	0	0	0	0	105305	242449	0	0	0	PIOx3 38:3	0	0	0	0.809832	0	0	0	0.622391	0	0.620066	0.782716	0	0	2.22222
933.535	H82 C47 O16 P1	0.79ppm	PIOx3 38:4	0	84269.4	97295.2	70574	430051	429475	129761	213483	135324	111071	443560	492900	116802	164264	749818	767268	231218	300296	449666	222083	830893	1.46605e+06	186184	235790	252754	181190	848450	1579166	191587	185371	351727	PIOx3 38:4	1.13688	1.59579	0.937612	6.06397	5.78686	1.62543	2.86333	1.93204	1.24452	5.25057	6.94464	1.32824	1.81914	12.6583
931.52	H80 C47 O16 P1	0.94ppm	PIOx3 38:5	0	0	0	39063.5	243489	228618	0	45981.5	47978	0	223682	230412	40167.3	0	392233	381668	0	100323	207195	0	386977	793796	0	102511	51146.8	0	349954	730700	0	73636.5	67229.6	PIOx3 38:5	0	0	0.518979	3.43333	3.08047	0	0.616725	0.684987	0	2.6478	3.24635	0.456769	0	6.62163
929.504	H78 C47 O16 P1	0.45ppm	PIOx3 38:6	0	0	0	0	0	0	0	0	0	0	0	0	0	0	88905.2	98021.3	0	0	0	0	52175.7	91386.9	0	0	0	0	79287.7	158646	0	0	0	PIOx3 38:6	0	0	0	0	0	0	0	0	0	0	0	0	0	1.50089
																																				0	0	0	0	0	0	0	0	0	0	0	0	0	0
																																				0	0	0	0	0	0	0	0	0	0	0	0	0	0
###	PhosphatidylinositolOx4																																			0	0	0	0	0	0	0	0	0	0	0	0	0	0
921.499	H78 C45 O17 P1	0.81ppm	PIOx4 36:4	0	0	0	0	0	0	0	0	0	0	0	0	0	0	0	101234	0	0	0	0	38836.8	44344.7	34954.9	0	0	0	0	102411	0	0	0	PIOx4 36:4	0	0	0	0	0	0	0	0	0	0	0	0	0	0
951.547	H84 C47 O17 P1	1.76ppm	PIOx4 38:3	0	0	0	0	0	62062.4	0	0	0	0	37671.8	0	0	0	149952	144049	0	0	0	0	97573.9	139929	0	0	0	0	70073.4	168299	0	0	0	PIOx4 38:3	0	0	0	0	0.836245	0	0	0	0	0.445934	0	0	0	2.53147
949.53	H82 C47 O17 P1	0.31ppm	PIOx4 38:4	0	0	0	0	215332	134709	0	82638.7	0	0	185809	182797	0	0	685707	830498	0	76916.9	150727	0	520135	1.07044e+06	0	32810.8	0	37236.9	506050	1.22364e+06	0	0	42183.5	PIOx4 38:4	0	0	0	3.0363	1.81511	0	1.10839	0	0	2.19948	2.57549	0	0	11.576
947.514	H80 C47 O17 P1	-0.21ppm	PIOx4 38:5	0	0	0	0	172076	116431	0	0	48808.5	0	96979.8	61205.4	36110.7	0	318784	272087	0	40160.7	124850	0	164213	392834	0	0	0	0	268194	367916	0	0	68201	PIOx4 38:5	0	0	0	2.42638	1.56882	0	0	0.696845	0	1.14798	0.862343	0.410639	0	5.38167
977.562	H86 C49 O17 P1	1.37ppm	PIOx4 40:4	0	0	0	0	0	0	0	0	0	46575	47715.4	0	66798	0	26670	88636.7	0	0	0	0	37176.3	90821.1	0	0	0	0	20661	61742.7	0	0	0	PIOx4 40:4	0	0	0	0	0	0	0	0	0.521858	0.564823	0	0.759605	0	0.450239
975.546	H84 C49 O17 P1	0.48ppm	PIOx4 40:5	0	0	0	0	0	0	0	0	0	0	0	0	0	0	59861.9	70858.9	0	0	35385	0	70817.7	123582	0	0	0	0	84077.1	104941	0	0	0	PIOx4 40:5	0	0	0	0	0	0	0	0	0	0	0	0	0	1.01058
973.53	H82 C49 O17 P1	0.81ppm	PIOx4 40:6	0	0	0	0	0	0	0	0	0	0	0	0	0	0	79588.5	0	0	0	0	0	37126	0	0	0	0	0	67324.9	82416.6	0	0	0	PIOx4 40:6	0	0	0	0	0	0	0	0	0	0	0	0	0	1.3436
																																				0	0	0	0	0	0	0	0	0	0	0	0	0	0
																																				0	0	0	0	0	0	0	0	0	0	0	0	0	0
###	PhosphatidylinositolOx5																																			0	0	0	0	0	0	0	0	0	0	0	0	0	0
967.541	H84 C47 O18 P1	0.89ppm	PIOx5 38:3	0	0	0	0	0	0	0	0	0	0	0	0	0	0	61828.2	0	0	0	43009.1	0	0	81178.2	0	0	0	0	0	60458.4	0	0	0	PIOx5 38:3	0	0	0	0	0	0	0	0	0	0	0	0	0	1.04378
965.525	H82 C47 O18 P1	1.06ppm	PIOx5 38:4	0	0	0	0	230436	164687	0	0	0	0	191612	184948	0	0	377374	360389	0	42738.5	198740	0	490702	756479	0	47914.5	0	0	418374	937366	0	0	0	PIOx5 38:4	0	0	0	3.24928	2.21903	0	0	0	0	2.26817	2.60579	0	0	6.37078
963.509	H80 C47 O18 P1	0.38ppm	PIOx5 38:5	0	0	0	0	63692.3	48779.8	0	0	0	0	86977.9	49786	0	0	175785	246312	0	0	65836.5	0	183223	337516	0	0	0	0	187847	373859	0	0	0	PIOx5 38:5	0	0	0	0.898098	0.657272	0	0	0	0	1.02959	0.701452	0	0	2.96758
993.558	H86 C49 O18 P1	1.90ppm	PIOx5 40:4	0	0	0	0	0	0	0	0	0	0	43191.7	0	0	0	0	0	0	0	0	0	49628.3	43617.9	0	0	0	0	0	62182.6	0	0	0	PIOx5 40:4	0	0	0	0	0	0	0	0	0	0.511275	0	0	0	0
991.54	H84 C49 O18 P1	0.39ppm	PIOx5 40:5	0	0	0	0	0	0	0	0	0	0	0	0	0	0	0	35877.6	0	0	0	0	42012.8	0	0	0	0	0	0	100446	0	0	0	PIOx5 40:5	0	0	0	0	0	0	0	0	0	0	0	0	0	0
989.525	H82 C49 O18 P1	0.29ppm	PIOx5 40:6	0	0	0	0	0	0	0	0	0	0	0	0	0	0	0	38915	0	0	0	0	0	0	0	0	0	0	68078.7	46247.5	0	0	0	PIOx5 40:6	0	0	0	0	0	0	0	0	0	0	0	0	0	0
																																				0	0	0	0	0	0	0	0	0	0	0	0	0	0
																																				0	0	0	0	0	0	0	0	0	0	0	0	0	0
###	PhosphatidylinositolOx6																																			0	0	0	0	0	0	0	0	0	0	0	0	0	0
981.52	H82 C47 O19 P1	0.57ppm	PIOx6 38:4	0	0	0	0	91428.4	0	0	0	0	0	113717	92750.9	0	0	255497	345953	0	32765.9	37551.3	0	162475	450767	0	0	0	0	201762	383624	0	0	0	PIOx6 38:4	0	0	0	1.28919	0	0	0	0	0	1.3461	1.3068	0	0	4.31326
979.504	H80 C47 O19 P1	0.24ppm	PIOx6 38:5	0	0	0	0	0	40661.4	0	0	0	0	0	0	0	0	112653	114644	0	0	0	0	74137.4	145472	0	0	0	0	68849.6	137460	0	0	0	PIOx6 38:5	0	0	0	0	0.547883	0	0	0	0	0	0	0	0	1.90179
1007.53	H84 C49 O19 P1	0.02ppm	PIOx6 40:5	0	0	0	0	0	0	0	0	0	0	0	0	0	0	71746.6	0	0	0	0	0	0	76042.2	0	0	0	0	0	93143.1	0	0	0	PIOx6 40:5	0	0	0	0	0	0	0	0	0	0	0	0	0	1.21122
[truncated: 16 more columns]
